# Supplementary material for: Barrier-to-Autointegration Factor Proteome Reveals Chromatin-Regulatory Partners
Source: PLoS One. 2009 Sep 16;4(9):e7050. doi: 10.1371/journal.pone.0007050 (PMC2739719; doi:10.1371/journal.pone.0007050)
Supplement: Table S1 — Excel spreadsheet showing peptides used to identify proteins with at least 89% confidence, as determined by Scaffold analysis of LC-MS/MS results for each eluate (0.3 M no BAF, 0.3 M BAF, 1 M no BAF, 1 M BAF). (1.53 MB XLS) [file pone.0007050.s001.xls]

## Sheet: Identification Results
Biological sample name	Protein name	Protein accession numbers	Protein molecular weight (Da)	Protein identification probability	Number of unique peptides	Percentage sequence coverage	Peptide sequence	Best Peptide identification probability	Other Proteins
300mM no BAF	PREDICTED: similar to Small nuclear ribonucleoprotein Sm D1 (snRNP	gi|109486880,gi|32959908,gi|5902102	13263.9	0.908	1	0.168	YFILPDSLPLDTLLVDVEPK	0.95	0
300mM no BAF	PREDICTED: thyroid hormone receptor associated protein 3 [Macaca	gi|109001986,gi|167234419,gi|27370586,gi|32450532,gi|33872162,gi|41350841,gi|4530441,gi|55725214,gi|73976859,gi|73976861	108651	0.908	1	0.0105	ASAVSELSPR	0.95	0
300mM no BAF	pannexin 3 [Homo sapiens], gi|20139071|sp|Q96QZ0|PANX3_HUMAN Pannexin-3, gi|15341532|gb|AAK95655.1|AF406650_1 putative gap junction protein pannexin 3 [Homo sapiens], gi|119587992|gb|EAW67588.1| pannexin 3 [Homo sapiens], gi|157170156|gb|AAI52945.1| Pannexin 3 [synthetic construct] [MASS=44683]	gi|16418453	44668.1	0.908	1	0.0204	QDGPGQDK	0.95	0
300mM no BAF	Keratin 10 [Homo sapiens].	gi|21961605,gi|28317	58810.8	1	8	0.183	ALEESNYELEGK	0.95	0
300mM no BAF	Keratin 10 [Homo sapiens].	gi|21961605,gi|28317	58810.8	1	8	0.183	GSLGGGFSSGGFSGGSFSR	0.95	0
300mM no BAF	Keratin 10 [Homo sapiens].	gi|21961605,gi|28317	58810.8	1	8	0.183	LASYLDK	0.858	gi|55956899,gi|81175178,gi|24430192,gi|15431310,gi|1195531,gi|386848,gi|21754583,gi|4557701,gi|12803709
300mM no BAF	Keratin 10 [Homo sapiens].	gi|21961605,gi|28317	58810.8	1	8	0.183	LKYENEVALR	0.902	0
300mM no BAF	Keratin 10 [Homo sapiens].	gi|21961605,gi|28317	58810.8	1	8	0.183	NQILNLTTDNANILLQIDNAR	0.95	0
300mM no BAF	Keratin 10 [Homo sapiens].	gi|21961605,gi|28317	58810.8	1	8	0.183	QSLEASLAETEGR	0.95	0
300mM no BAF	Keratin 10 [Homo sapiens].	gi|21961605,gi|28317	58810.8	1	8	0.183	SLLEGEGSSGGGGR	0.95	0
300mM no BAF	Keratin 10 [Homo sapiens].	gi|21961605,gi|28317	58810.8	1	8	0.183	SQYEQLAEQNR	0.95	0
300mM no BAF	non-POU domain containing, octamer-binding [Bos taurus].	gi|114053303,gi|34932414,gi|407308,gi|67970671,gi|74007632,gi|74007640,gi|74007642	54233.6	1	8	0.185	AAPGAEFAPNKR	0.95	0
300mM no BAF	non-POU domain containing, octamer-binding [Bos taurus].	gi|114053303,gi|34932414,gi|407308,gi|67970671,gi|74007632,gi|74007640,gi|74007642	54233.6	1	8	0.185	AGEVFIHK	0.95	0
300mM no BAF	non-POU domain containing, octamer-binding [Bos taurus].	gi|114053303,gi|34932414,gi|407308,gi|67970671,gi|74007632,gi|74007640,gi|74007642	54233.6	1	8	0.185	AVVIVDDR	0.884	gi|4826998,gi|38014635,gi|29881667
300mM no BAF	non-POU domain containing, octamer-binding [Bos taurus].	gi|114053303,gi|34932414,gi|407308,gi|67970671,gi|74007632,gi|74007640,gi|74007642	54233.6	1	8	0.185	FACHSASLTVR	0.921	0
300mM no BAF	non-POU domain containing, octamer-binding [Bos taurus].	gi|114053303,gi|34932414,gi|407308,gi|67970671,gi|74007632,gi|74007640,gi|74007642	54233.6	1	8	0.185	FGQAATMEGIGAIGGTPPAFNR	0.95	0
300mM no BAF	non-POU domain containing, octamer-binding [Bos taurus].	gi|114053303,gi|34932414,gi|407308,gi|67970671,gi|74007632,gi|74007640,gi|74007642	54233.6	1	8	0.185	MEELHNQEVQK	0.95	0
300mM no BAF	non-POU domain containing, octamer-binding [Bos taurus].	gi|114053303,gi|34932414,gi|407308,gi|67970671,gi|74007632,gi|74007640,gi|74007642	54233.6	1	8	0.185	TFNLEK	0.755	0
300mM no BAF	non-POU domain containing, octamer-binding [Bos taurus].	gi|114053303,gi|34932414,gi|407308,gi|67970671,gi|74007632,gi|74007640,gi|74007642	54233.6	1	8	0.185	VELDNMPLR	0.95	0
300mM no BAF	PREDICTED: similar to DNA topoisomerase I [Macaca mulatta].	gi|109092040,gi|11225260,gi|12018294,gi|12654247,gi|220618,gi|23200355,gi|27065157,gi|28948850,gi|297079,gi|309523,gi|339806,gi|38503303,gi|40889577,gi|41056366,gi|473581,gi|473583,gi|50513401,gi|57639320,gi|586107,gi|66360105,gi|73992436,gi|74183500	115324	0.908	1	0.00996	AVAILCNHQR	0.95	0
300mM no BAF	PREDICTED: similar to splicing factor, arginine/serine-rich 1	gi|109114623,gi|118582269,gi|118582271,gi|179074,gi|197099026,gi|5902076,gi|62088696,gi|73966546,gi|73966552,gi|73966554	27727.1	1	5	0.202	DAEDAVYGR	0.721	0
300mM no BAF	PREDICTED: similar to splicing factor, arginine/serine-rich 1	gi|109114623,gi|118582269,gi|118582271,gi|179074,gi|197099026,gi|5902076,gi|62088696,gi|73966546,gi|73966552,gi|73966554	27727.1	1	5	0.202	DGTGVVEFVR	0.902	0
300mM no BAF	PREDICTED: similar to splicing factor, arginine/serine-rich 1	gi|109114623,gi|118582269,gi|118582271,gi|179074,gi|197099026,gi|5902076,gi|62088696,gi|73966546,gi|73966552,gi|73966554	27727.1	1	5	0.202	EAGDVCYADVYR	0.95	0
300mM no BAF	PREDICTED: similar to splicing factor, arginine/serine-rich 1	gi|109114623,gi|118582269,gi|118582271,gi|179074,gi|197099026,gi|5902076,gi|62088696,gi|73966546,gi|73966552,gi|73966554	27727.1	1	5	0.202	KEDMTYAVR	0.501	0
300mM no BAF	PREDICTED: similar to splicing factor, arginine/serine-rich 1	gi|109114623,gi|118582269,gi|118582271,gi|179074,gi|197099026,gi|5902076,gi|62088696,gi|73966546,gi|73966552,gi|73966554	27727.1	1	5	0.202	TKDIEDVFYK	0.692	0
300mM no BAF	PREDICTED: similar to 60S ribosomal protein L35 [Rattus	gi|109506402,gi|13385044,gi|15012043,gi|45384769,gi|47523710,gi|55632305,gi|57160644,gi|6005860,gi|77735941	14532.5	0.908	1	0.0813	VLTVINQTQK	0.95	0
300mM no BAF	PREDICTED: similar to histone 1, H2ai (predicted) isoform 1 [Canis	gi|74003971	28977.8	1	7	0.239	AMGIMNSFVNDIFER	0.95	gi|10800140,gi|27693390,gi|46049029,gi|13386452,gi|109017921,gi|55589506,gi|109070012,gi|74004213,gi|4504277,gi|61835422,gi|68532405,gi|61827353,gi|20336754,gi|31979,gi|184086,gi|68226431,gi|28173554,gi|32113,gi|73975428,gi|16306566
300mM no BAF	PREDICTED: similar to histone 1, H2ai (predicted) isoform 1 [Canis	gi|74003971	28977.8	1	7	0.239	DIQLAR	0.898	gi|109073005
300mM no BAF	PREDICTED: similar to histone 1, H2ai (predicted) isoform 1 [Canis	gi|74003971	28977.8	1	7	0.239	EIAQDFK	0.95	gi|109073005
300mM no BAF	PREDICTED: similar to histone 1, H2ai (predicted) isoform 1 [Canis	gi|74003971	28977.8	1	7	0.239	KESYSVYVYK	0.95	gi|126165296
300mM no BAF	PREDICTED: similar to histone 1, H2ai (predicted) isoform 1 [Canis	gi|74003971	28977.8	1	7	0.239	KLPFQR	0.777	0
300mM no BAF	PREDICTED: similar to histone 1, H2ai (predicted) isoform 1 [Canis	gi|74003971	28977.8	1	7	0.239	QVHPDTGISSK	0.95	gi|10800140,gi|27693390,gi|46049029,gi|13386452,gi|109017921,gi|55589506,gi|109070012,gi|74004213,gi|4504277,gi|61835422,gi|68532405,gi|61827353,gi|20336754,gi|31979,gi|184086,gi|68226431,gi|28173554,gi|32113,gi|73975428,gi|16306566,gi|126165296
300mM no BAF	PREDICTED: similar to histone 1, H2ai (predicted) isoform 1 [Canis	gi|74003971	28977.8	1	7	0.239	STELLIR	0.632	gi|109073005
300mM no BAF	lamin A/C isoform 1 precursor [Homo sapiens], gi|125962|sp|P02545|LMNA_HUMAN Lamin-A/C (70 kDa lamin) (Renal carcinoma antigen NY-REN-32), gi|54035059|gb|AAH14507.1| Lamin A/C [Homo sapiens], gi|55957498|emb|CAI15522.1| lamin A/C [Homo sapiens], gi|190690113|gb|ACE86831.1| lamin A/C protein [synthetic construct], gi|190691485|gb|ACE87517.1| lamin A/C protein [synthetic construct] [MASS=74139]	gi|27436946,gi|57014043	74122.6	1	24	0.381	AQNTWGCGNSLR	0.95	0
300mM no BAF	lamin A/C isoform 1 precursor [Homo sapiens], gi|125962|sp|P02545|LMNA_HUMAN Lamin-A/C (70 kDa lamin) (Renal carcinoma antigen NY-REN-32), gi|54035059|gb|AAH14507.1| Lamin A/C [Homo sapiens], gi|55957498|emb|CAI15522.1| lamin A/C [Homo sapiens], gi|190690113|gb|ACE86831.1| lamin A/C protein [synthetic construct], gi|190691485|gb|ACE87517.1| lamin A/C protein [synthetic construct] [MASS=74139]	gi|27436946,gi|57014043	74122.6	1	24	0.381	ASASGSGAQVGGPISSGSSASSVTVTR	0.95	0
300mM no BAF	lamin A/C isoform 1 precursor [Homo sapiens], gi|125962|sp|P02545|LMNA_HUMAN Lamin-A/C (70 kDa lamin) (Renal carcinoma antigen NY-REN-32), gi|54035059|gb|AAH14507.1| Lamin A/C [Homo sapiens], gi|55957498|emb|CAI15522.1| lamin A/C [Homo sapiens], gi|190690113|gb|ACE86831.1| lamin A/C protein [synthetic construct], gi|190691485|gb|ACE87517.1| lamin A/C protein [synthetic construct] [MASS=74139]	gi|27436946,gi|57014043	74122.6	1	24	0.381	DLEDSLAR	0.95	gi|74220835
300mM no BAF	lamin A/C isoform 1 precursor [Homo sapiens], gi|125962|sp|P02545|LMNA_HUMAN Lamin-A/C (70 kDa lamin) (Renal carcinoma antigen NY-REN-32), gi|54035059|gb|AAH14507.1| Lamin A/C [Homo sapiens], gi|55957498|emb|CAI15522.1| lamin A/C [Homo sapiens], gi|190690113|gb|ACE86831.1| lamin A/C protein [synthetic construct], gi|190691485|gb|ACE87517.1| lamin A/C protein [synthetic construct] [MASS=74139]	gi|27436946,gi|57014043	74122.6	1	24	0.381	EDLQELNDR	0.932	gi|74220835
300mM no BAF	lamin A/C isoform 1 precursor [Homo sapiens], gi|125962|sp|P02545|LMNA_HUMAN Lamin-A/C (70 kDa lamin) (Renal carcinoma antigen NY-REN-32), gi|54035059|gb|AAH14507.1| Lamin A/C [Homo sapiens], gi|55957498|emb|CAI15522.1| lamin A/C [Homo sapiens], gi|190690113|gb|ACE86831.1| lamin A/C protein [synthetic construct], gi|190691485|gb|ACE87517.1| lamin A/C protein [synthetic construct] [MASS=74139]	gi|27436946,gi|57014043	74122.6	1	24	0.381	EELDFQK	0.95	gi|74220835
300mM no BAF	lamin A/C isoform 1 precursor [Homo sapiens], gi|125962|sp|P02545|LMNA_HUMAN Lamin-A/C (70 kDa lamin) (Renal carcinoma antigen NY-REN-32), gi|54035059|gb|AAH14507.1| Lamin A/C [Homo sapiens], gi|55957498|emb|CAI15522.1| lamin A/C [Homo sapiens], gi|190690113|gb|ACE86831.1| lamin A/C protein [synthetic construct], gi|190691485|gb|ACE87517.1| lamin A/C protein [synthetic construct] [MASS=74139]	gi|27436946,gi|57014043	74122.6	1	24	0.381	ITESEEVVSR	0.95	gi|74220835
300mM no BAF	lamin A/C isoform 1 precursor [Homo sapiens], gi|125962|sp|P02545|LMNA_HUMAN Lamin-A/C (70 kDa lamin) (Renal carcinoma antigen NY-REN-32), gi|54035059|gb|AAH14507.1| Lamin A/C [Homo sapiens], gi|55957498|emb|CAI15522.1| lamin A/C [Homo sapiens], gi|190690113|gb|ACE86831.1| lamin A/C protein [synthetic construct], gi|190691485|gb|ACE87517.1| lamin A/C protein [synthetic construct] [MASS=74139]	gi|27436946,gi|57014043	74122.6	1	24	0.381	KEGDLIAAQAR	0.805	gi|74220835
300mM no BAF	lamin A/C isoform 1 precursor [Homo sapiens], gi|125962|sp|P02545|LMNA_HUMAN Lamin-A/C (70 kDa lamin) (Renal carcinoma antigen NY-REN-32), gi|54035059|gb|AAH14507.1| Lamin A/C [Homo sapiens], gi|55957498|emb|CAI15522.1| lamin A/C [Homo sapiens], gi|190690113|gb|ACE86831.1| lamin A/C protein [synthetic construct], gi|190691485|gb|ACE87517.1| lamin A/C protein [synthetic construct] [MASS=74139]	gi|27436946,gi|57014043	74122.6	1	24	0.381	KLLEGEEER	0.95	gi|5031877,gi|73987493,gi|74220835,gi|27436951
300mM no BAF	lamin A/C isoform 1 precursor [Homo sapiens], gi|125962|sp|P02545|LMNA_HUMAN Lamin-A/C (70 kDa lamin) (Renal carcinoma antigen NY-REN-32), gi|54035059|gb|AAH14507.1| Lamin A/C [Homo sapiens], gi|55957498|emb|CAI15522.1| lamin A/C [Homo sapiens], gi|190690113|gb|ACE86831.1| lamin A/C protein [synthetic construct], gi|190691485|gb|ACE87517.1| lamin A/C protein [synthetic construct] [MASS=74139]	gi|27436946,gi|57014043	74122.6	1	24	0.381	KQLQDEMLR	0.95	gi|74220835
300mM no BAF	lamin A/C isoform 1 precursor [Homo sapiens], gi|125962|sp|P02545|LMNA_HUMAN Lamin-A/C (70 kDa lamin) (Renal carcinoma antigen NY-REN-32), gi|54035059|gb|AAH14507.1| Lamin A/C [Homo sapiens], gi|55957498|emb|CAI15522.1| lamin A/C [Homo sapiens], gi|190690113|gb|ACE86831.1| lamin A/C protein [synthetic construct], gi|190691485|gb|ACE87517.1| lamin A/C protein [synthetic construct] [MASS=74139]	gi|27436946,gi|57014043	74122.6	1	24	0.381	LADALQELR	0.95	gi|74220835
300mM no BAF	lamin A/C isoform 1 precursor [Homo sapiens], gi|125962|sp|P02545|LMNA_HUMAN Lamin-A/C (70 kDa lamin) (Renal carcinoma antigen NY-REN-32), gi|54035059|gb|AAH14507.1| Lamin A/C [Homo sapiens], gi|55957498|emb|CAI15522.1| lamin A/C [Homo sapiens], gi|190690113|gb|ACE86831.1| lamin A/C protein [synthetic construct], gi|190691485|gb|ACE87517.1| lamin A/C protein [synthetic construct] [MASS=74139]	gi|27436946,gi|57014043	74122.6	1	24	0.381	LEAALGEAK	0.95	gi|74220835
300mM no BAF	lamin A/C isoform 1 precursor [Homo sapiens], gi|125962|sp|P02545|LMNA_HUMAN Lamin-A/C (70 kDa lamin) (Renal carcinoma antigen NY-REN-32), gi|54035059|gb|AAH14507.1| Lamin A/C [Homo sapiens], gi|55957498|emb|CAI15522.1| lamin A/C [Homo sapiens], gi|190690113|gb|ACE86831.1| lamin A/C protein [synthetic construct], gi|190691485|gb|ACE87517.1| lamin A/C protein [synthetic construct] [MASS=74139]	gi|27436946,gi|57014043	74122.6	1	24	0.381	LLEGEEER	0.95	gi|5031877,gi|73987493,gi|74220835,gi|27436951
300mM no BAF	lamin A/C isoform 1 precursor [Homo sapiens], gi|125962|sp|P02545|LMNA_HUMAN Lamin-A/C (70 kDa lamin) (Renal carcinoma antigen NY-REN-32), gi|54035059|gb|AAH14507.1| Lamin A/C [Homo sapiens], gi|55957498|emb|CAI15522.1| lamin A/C [Homo sapiens], gi|190690113|gb|ACE86831.1| lamin A/C protein [synthetic construct], gi|190691485|gb|ACE87517.1| lamin A/C protein [synthetic construct] [MASS=74139]	gi|27436946,gi|57014043	74122.6	1	24	0.381	LQEKEDLQELNDR	0.95	gi|74220835
300mM no BAF	lamin A/C isoform 1 precursor [Homo sapiens], gi|125962|sp|P02545|LMNA_HUMAN Lamin-A/C (70 kDa lamin) (Renal carcinoma antigen NY-REN-32), gi|54035059|gb|AAH14507.1| Lamin A/C [Homo sapiens], gi|55957498|emb|CAI15522.1| lamin A/C [Homo sapiens], gi|190690113|gb|ACE86831.1| lamin A/C protein [synthetic construct], gi|190691485|gb|ACE87517.1| lamin A/C protein [synthetic construct] [MASS=74139]	gi|27436946,gi|57014043	74122.6	1	24	0.381	LQLELSK	0.95	gi|74220835
300mM no BAF	lamin A/C isoform 1 precursor [Homo sapiens], gi|125962|sp|P02545|LMNA_HUMAN Lamin-A/C (70 kDa lamin) (Renal carcinoma antigen NY-REN-32), gi|54035059|gb|AAH14507.1| Lamin A/C [Homo sapiens], gi|55957498|emb|CAI15522.1| lamin A/C [Homo sapiens], gi|190690113|gb|ACE86831.1| lamin A/C protein [synthetic construct], gi|190691485|gb|ACE87517.1| lamin A/C protein [synthetic construct] [MASS=74139]	gi|27436946,gi|57014043	74122.6	1	24	0.381	LRDLEDSLAR	0.941	gi|74220835
300mM no BAF	lamin A/C isoform 1 precursor [Homo sapiens], gi|125962|sp|P02545|LMNA_HUMAN Lamin-A/C (70 kDa lamin) (Renal carcinoma antigen NY-REN-32), gi|54035059|gb|AAH14507.1| Lamin A/C [Homo sapiens], gi|55957498|emb|CAI15522.1| lamin A/C [Homo sapiens], gi|190690113|gb|ACE86831.1| lamin A/C protein [synthetic construct], gi|190691485|gb|ACE87517.1| lamin A/C protein [synthetic construct] [MASS=74139]	gi|27436946,gi|57014043	74122.6	1	24	0.381	LVEIDNGK	0.95	gi|74220835
300mM no BAF	lamin A/C isoform 1 precursor [Homo sapiens], gi|125962|sp|P02545|LMNA_HUMAN Lamin-A/C (70 kDa lamin) (Renal carcinoma antigen NY-REN-32), gi|54035059|gb|AAH14507.1| Lamin A/C [Homo sapiens], gi|55957498|emb|CAI15522.1| lamin A/C [Homo sapiens], gi|190690113|gb|ACE86831.1| lamin A/C protein [synthetic construct], gi|190691485|gb|ACE87517.1| lamin A/C protein [synthetic construct] [MASS=74139]	gi|27436946,gi|57014043	74122.6	1	24	0.381	MQQQLDEYQELLDIK	0.635	gi|74220835
300mM no BAF	lamin A/C isoform 1 precursor [Homo sapiens], gi|125962|sp|P02545|LMNA_HUMAN Lamin-A/C (70 kDa lamin) (Renal carcinoma antigen NY-REN-32), gi|54035059|gb|AAH14507.1| Lamin A/C [Homo sapiens], gi|55957498|emb|CAI15522.1| lamin A/C [Homo sapiens], gi|190690113|gb|ACE86831.1| lamin A/C protein [synthetic construct], gi|190691485|gb|ACE87517.1| lamin A/C protein [synthetic construct] [MASS=74139]	gi|27436946,gi|57014043	74122.6	1	24	0.381	NSNLVGAAHEELQQSR	0.95	gi|74220835
300mM no BAF	lamin A/C isoform 1 precursor [Homo sapiens], gi|125962|sp|P02545|LMNA_HUMAN Lamin-A/C (70 kDa lamin) (Renal carcinoma antigen NY-REN-32), gi|54035059|gb|AAH14507.1| Lamin A/C [Homo sapiens], gi|55957498|emb|CAI15522.1| lamin A/C [Homo sapiens], gi|190690113|gb|ACE86831.1| lamin A/C protein [synthetic construct], gi|190691485|gb|ACE87517.1| lamin A/C protein [synthetic construct] [MASS=74139]	gi|27436946,gi|57014043	74122.6	1	24	0.381	SGAQASSTPLSPTR	0.95	gi|74220835
300mM no BAF	lamin A/C isoform 1 precursor [Homo sapiens], gi|125962|sp|P02545|LMNA_HUMAN Lamin-A/C (70 kDa lamin) (Renal carcinoma antigen NY-REN-32), gi|54035059|gb|AAH14507.1| Lamin A/C [Homo sapiens], gi|55957498|emb|CAI15522.1| lamin A/C [Homo sapiens], gi|190690113|gb|ACE86831.1| lamin A/C protein [synthetic construct], gi|190691485|gb|ACE87517.1| lamin A/C protein [synthetic construct] [MASS=74139]	gi|27436946,gi|57014043	74122.6	1	24	0.381	SLETENAGLR	0.95	gi|74220835
300mM no BAF	lamin A/C isoform 1 precursor [Homo sapiens], gi|125962|sp|P02545|LMNA_HUMAN Lamin-A/C (70 kDa lamin) (Renal carcinoma antigen NY-REN-32), gi|54035059|gb|AAH14507.1| Lamin A/C [Homo sapiens], gi|55957498|emb|CAI15522.1| lamin A/C [Homo sapiens], gi|190690113|gb|ACE86831.1| lamin A/C protein [synthetic construct], gi|190691485|gb|ACE87517.1| lamin A/C protein [synthetic construct] [MASS=74139]	gi|27436946,gi|57014043	74122.6	1	24	0.381	SNEDQSMGNWQIK	0.95	0
300mM no BAF	lamin A/C isoform 1 precursor [Homo sapiens], gi|125962|sp|P02545|LMNA_HUMAN Lamin-A/C (70 kDa lamin) (Renal carcinoma antigen NY-REN-32), gi|54035059|gb|AAH14507.1| Lamin A/C [Homo sapiens], gi|55957498|emb|CAI15522.1| lamin A/C [Homo sapiens], gi|190690113|gb|ACE86831.1| lamin A/C protein [synthetic construct], gi|190691485|gb|ACE87517.1| lamin A/C protein [synthetic construct] [MASS=74139]	gi|27436946,gi|57014043	74122.6	1	24	0.381	SVGGSGGGSFGDNLVTR	0.95	0
300mM no BAF	lamin A/C isoform 1 precursor [Homo sapiens], gi|125962|sp|P02545|LMNA_HUMAN Lamin-A/C (70 kDa lamin) (Renal carcinoma antigen NY-REN-32), gi|54035059|gb|AAH14507.1| Lamin A/C [Homo sapiens], gi|55957498|emb|CAI15522.1| lamin A/C [Homo sapiens], gi|190690113|gb|ACE86831.1| lamin A/C protein [synthetic construct], gi|190691485|gb|ACE87517.1| lamin A/C protein [synthetic construct] [MASS=74139]	gi|27436946,gi|57014043	74122.6	1	24	0.381	TALINSTGEEVAMR	0.95	gi|74220835
300mM no BAF	lamin A/C isoform 1 precursor [Homo sapiens], gi|125962|sp|P02545|LMNA_HUMAN Lamin-A/C (70 kDa lamin) (Renal carcinoma antigen NY-REN-32), gi|54035059|gb|AAH14507.1| Lamin A/C [Homo sapiens], gi|55957498|emb|CAI15522.1| lamin A/C [Homo sapiens], gi|190690113|gb|ACE86831.1| lamin A/C protein [synthetic construct], gi|190691485|gb|ACE87517.1| lamin A/C protein [synthetic construct] [MASS=74139]	gi|27436946,gi|57014043	74122.6	1	24	0.381	TVLCGTCGQPADK	0.95	0
300mM no BAF	RecName: Full=Serum albumin; AltName: Full=BSA; AltName:	gi|1351907,gi|30794280,gi|74267962	69306.2	0.908	1	0.0181	HLVDEPQNLIK	0.95	gi|229552
300mM no BAF	RecName: Full=Histone H1.1; AltName: Full=CTL-1.	gi|121903,gi|45479844,gi|4885375,gi|68534962,gi|74003979	21347.8	0.998	2	0.0939	ALAAAGYDVEK	0.95	gi|57110429,gi|74004254
300mM no BAF	RecName: Full=Histone H1.1; AltName: Full=CTL-1.	gi|121903,gi|45479844,gi|4885375,gi|68534962,gi|74003979	21347.8	0.998	2	0.0939	SGVSLAALK	0.95	0
300mM no BAF	Snrpf protein [Mus musculus].	gi|41946811,gi|4507131,gi|73978207,gi|74189295,gi|74353864,gi|83027678,gi|94372795	30516.6	0.908	1	0.0464	GVEEEEEDGEMRE	0.95	0
300mM no BAF	histone cluster 1, H2bn [Bos taurus].	gi|126165296	13905.5	0.908	1	0.286	AMGNMNSFVNDIFER	0.95	0
300mM no BAF	histone cluster 1, H2bn [Bos taurus].	gi|126165296	13905.5	0.908	1	0.286	KESYSVYVYK	0.95	gi|74003971
300mM no BAF	histone cluster 1, H2bn [Bos taurus].	gi|126165296	13905.5	0.908	1	0.286	QVHPDTGISSK	0.95	gi|10800140,gi|27693390,gi|46049029,gi|13386452,gi|109017921,gi|55589506,gi|109070012,gi|74004213,gi|4504277,gi|74003971,gi|61835422,gi|68532405,gi|61827353,gi|20336754,gi|31979,gi|184086,gi|68226431,gi|28173554,gi|32113,gi|73975428,gi|16306566
300mM no BAF	Try10-like trypsinogen [Mus musculus]	gi|51092303,gi|84781771	26202.7	0.908	1	0.0407	TLDNDIMLIK	0.95	0
300mM no BAF	Keratin, type II cytoskeletal 1 (Cytokeratin-1) (CK-1) (Keratin-1) (K1) (Type II keratin Kb1)	gi|81891716	0	0.908	1	0	DYQELMNTK	0.95	gi|11935049,gi|109096823,gi|109096825,gi|109096827,gi|109096829
300mM no BAF	Keratin, type II cytoskeletal 1 (Cytokeratin-1) (CK-1) (Keratin-1) (K1) (Type II keratin Kb1)	gi|81891716	0	0.908	1	0	FASFIDK	0.818	gi|109096781,gi|18999435,gi|109096797,gi|47132620,gi|109096795,gi|109096789,gi|547754,gi|109096793,gi|293686
300mM no BAF	Keratin, type II cytoskeletal 1 (Cytokeratin-1) (CK-1) (Keratin-1) (K1) (Type II keratin Kb1)	gi|81891716	0	0.908	1	0	SLNDKFASFIDK	0.95	0
300mM no BAF	Keratin, type II cytoskeletal 1 (Cytokeratin-1) (CK-1) (Keratin-1) (K1) (Type II keratin Kb1)	gi|81891716	0	0.908	1	0	TNAENEFVTIK	0.95	gi|11935049,gi|109096823,gi|109096825,gi|109096827,gi|109096829
300mM no BAF	unnamed protein product [Mus musculus].	gi|12843046,gi|71043961	26404.1	0.908	1	0.0486	YVNWIQQTIAAN	0.95	0
300mM no BAF	unnamed protein product [Homo sapiens].	gi|28590	69277.9	0.908	1	0.0246	KVPEVSTPTLVEVSR	0.95	0
300mM no BAF	Chain A, Crystal Structure Of Enhancer Of Rudimentary Homologue	gi|66360372	12734	0.908	1	0.252	ADTQTYQPYNK	0.934	gi|4758302,gi|73964238
300mM no BAF	Chain A, Crystal Structure Of Enhancer Of Rudimentary Homologue	gi|66360372	12734	0.908	1	0.252	TYADYESVNECXEGVCK	0.95	0
300mM no BAF	PREDICTED: similar to 60S ribosomal protein L17 (L23) [Macaca	gi|109048490,gi|109111503,gi|109113585,gi|22001904,gi|28174920,gi|28189725,gi|28189865,gi|42542645,gi|42627879,gi|4506617,gi|57095306,gi|62638830,gi|63101541,gi|73962149,gi|73962151,gi|73962154,gi|73962156,gi|73974342,gi|73977961,gi|73977963,gi|73990257,gi|73990259	21379.5	0.908	1	0.0543	YSLDPENPTK	0.95	0
300mM no BAF	heterogeneous nuclear ribonucleoprotein A2/B1 isoform 1 [Mus	gi|109134362,gi|124028629,gi|14043072,gi|197101465,gi|32880197,gi|3329498,gi|37747847,gi|4504447,gi|73976110,gi|73976114,gi|73976122,gi|73976124,gi|73976128,gi|73976130,gi|73976132,gi|75074832	32442.9	0.998	2	0.133	GGGGNFGPGPGSNFR	0.95	0
300mM no BAF	heterogeneous nuclear ribonucleoprotein A2/B1 isoform 1 [Mus	gi|109134362,gi|124028629,gi|14043072,gi|197101465,gi|32880197,gi|3329498,gi|37747847,gi|4504447,gi|73976110,gi|73976114,gi|73976122,gi|73976124,gi|73976128,gi|73976130,gi|73976132,gi|75074832	32442.9	0.998	2	0.133	NMGGPYGGGNYGPGGSGGSGGYGGR	0.95	0
300mM no BAF	PREDICTED: RNA, U3 small nucleolar interacting protein 2 [Macaca	gi|109039317,gi|21704248,gi|4759276	51822.9	0.996	2	0.04	AFEEDQVAGR	0.95	0
300mM no BAF	PREDICTED: RNA, U3 small nucleolar interacting protein 2 [Macaca	gi|109039317,gi|21704248,gi|4759276	51822.9	0.996	2	0.04	DAVSGLAFR	0.912	0
300mM no BAF	PREDICTED: similar to heterogeneous nuclear ribonucleoprotein L isoform a isoform 3 [Macaca mulatta]	gi|109124618,gi|11527777,gi|133274,gi|52632383,gi|52632385,gi|57036575,gi|67971924,gi|73947704	60169.1	1	4	0.131	ASLNGADIYSGCCTLK	0.95	0
300mM no BAF	PREDICTED: similar to heterogeneous nuclear ribonucleoprotein L isoform a isoform 3 [Macaca mulatta]	gi|109124618,gi|11527777,gi|133274,gi|52632383,gi|52632385,gi|57036575,gi|67971924,gi|73947704	60169.1	1	4	0.131	NDQDTWDYTNPNLSGQGDPGSNPNKR	0.95	0
300mM no BAF	PREDICTED: similar to heterogeneous nuclear ribonucleoprotein L isoform a isoform 3 [Macaca mulatta]	gi|109124618,gi|11527777,gi|133274,gi|52632383,gi|52632385,gi|57036575,gi|67971924,gi|73947704	60169.1	1	4	0.131	QPAIMPGQSYGLEDGSCSYK	0.95	0
300mM no BAF	PREDICTED: similar to heterogeneous nuclear ribonucleoprotein L isoform a isoform 3 [Macaca mulatta]	gi|109124618,gi|11527777,gi|133274,gi|52632383,gi|52632385,gi|57036575,gi|67971924,gi|73947704	60169.1	1	4	0.131	SSSGLLEWESK	0.95	0
300mM no BAF	PREDICTED: similar to Histone H1.5 (Histone H1a) [Canis familiaris]	gi|57110429,gi|74004254	0	0.908	1	0	ALAAAGYDVEK	0.95	gi|68534962,gi|4885375,gi|121903,gi|74003979,gi|45479844
300mM no BAF	PREDICTED: similar to Histone H1.5 (Histone H1a) [Canis familiaris]	gi|57110429,gi|74004254	0	0.908	1	0	NGLSLAALK	0.95	gi|4885381,gi|109070064,gi|55626268
300mM no BAF	unnamed protein product [Homo sapiens]	gi|527578	16574.2	0.908	1	0.0929	DLTTAGAVTQCYR	0.95	0
300mM no BAF	PREDICTED: similar to Histone H1.5 (Histone H1a) [Macaca mulatta].	gi|109070064,gi|4885381,gi|55626268	22563.7	1	3	0.146	ALAAGGYDVEK	0.95	0
300mM no BAF	PREDICTED: similar to Histone H1.5 (Histone H1a) [Macaca mulatta].	gi|109070064,gi|4885381,gi|55626268	22563.7	1	3	0.146	ATGPPVSELITK	0.907	0
300mM no BAF	PREDICTED: similar to Histone H1.5 (Histone H1a) [Macaca mulatta].	gi|109070064,gi|4885381,gi|55626268	22563.7	1	3	0.146	KATGPPVSELITK	0.95	0
300mM no BAF	PREDICTED: similar to Histone H1.5 (Histone H1a) [Macaca mulatta].	gi|109070064,gi|4885381,gi|55626268	22563.7	1	3	0.146	NGLSLAALK	0.95	gi|57110429,gi|74004254
300mM no BAF	PREDICTED: similar to ribosomal protein L19 [Macaca mulatta].	gi|109048759,gi|109072118,gi|109086675,gi|109114839,gi|16798651,gi|24059826,gi|26224758,gi|31873372,gi|4506609,gi|62897725,gi|6677773,gi|73966132	23449.4	0.908	1	0.0867	VWLDPNETNEIANANSR	0.95	0
300mM no BAF	splicing factor 3b, subunit 4 [Mus musculus].	gi|23346437,gi|5032069,gi|62898205,gi|73981537,gi|75948207,gi|94398719	44368.5	0.908	1	0.033	NQDATVYVGGLDEK	0.95	0
300mM no BAF	RecName: Full=Endophilin-A3; AltName: Full=Endophilin-3; AltName:	gi|10720275,gi|109082177,gi|13676845,gi|20071321,gi|28144914,gi|66794529,gi|73951677,gi|84000273	0	0.908	1	0	IKEILSK	0.95	0
300mM no BAF	PREDICTED: similar to tropomyosin 1, alpha isoform c isoform 13	gi|109081379,gi|109081385,gi|109081389,gi|109081393,gi|109081409,gi|109081413,gi|207353,gi|27597085,gi|339958,gi|63252900,gi|78000192,gi|82469907,gi|854189	32831.1	0.998	2	0.0775	AELSEGQVR	0.95	0
300mM no BAF	PREDICTED: similar to tropomyosin 1, alpha isoform c isoform 13	gi|109081379,gi|109081385,gi|109081389,gi|109081393,gi|109081409,gi|109081413,gi|207353,gi|27597085,gi|339958,gi|63252900,gi|78000192,gi|82469907,gi|854189	32831.1	0.998	2	0.0775	ATDAEADVASLNR	0.95	0
300mM no BAF	enhancer of rudimentary homolog [Homo sapiens], gi|6679685|ref|NP_031977.1| enhancer of rudimentary homolog [Mus musculus], gi|77735625|ref|NP_001029508.1| enhancer of rudimentary homolog [Bos taurus], gi|147900462|ref|NP_001083823.1| enhancer of rudimentary homologue ERH [Xenopus laevis], gi|55640957|ref|XP_510031.1| PREDICTED: enhancer of rudimentary homolog isoform 2 [Pan troglodytes], gi|1090…	gi|4758302,gi|73964238	12241.3	0.997	2	0.269	ADTQTYQPYNK	0.934	gi|66360372
300mM no BAF	enhancer of rudimentary homolog [Homo sapiens], gi|6679685|ref|NP_031977.1| enhancer of rudimentary homolog [Mus musculus], gi|77735625|ref|NP_001029508.1| enhancer of rudimentary homolog [Bos taurus], gi|147900462|ref|NP_001083823.1| enhancer of rudimentary homologue ERH [Xenopus laevis], gi|55640957|ref|XP_510031.1| PREDICTED: enhancer of rudimentary homolog isoform 2 [Pan troglodytes], gi|1090…	gi|4758302,gi|73964238	12241.3	0.997	2	0.269	TYADYESVNECMEGVCK	0.95	0
300mM no BAF	PREDICTED: similar to heat shock protein 8 [Rattus norvegicus].	gi|109464859,gi|123647,gi|13242237,gi|13399491,gi|16041102,gi|24234686,gi|309319,gi|347019,gi|42542422,gi|428,gi|56403676,gi|5729877,gi|6137547,gi|6137549,gi|62896815,gi|62897129,gi|63101351,gi|6729733,gi|6729825,gi|73954621,gi|73954623,gi|74012289,gi|74012291,gi|74142813,gi|74143862,gi|74181586,gi|74184057,gi|74186087,gi|74190799,gi|74191381,gi|74198978,gi|74208631,gi|74211667,gi|74214176,gi|742…	0	1	4	0	FDDAVVQSDMK	0.891	0
300mM no BAF	PREDICTED: similar to heat shock protein 8 [Rattus norvegicus].	gi|109464859,gi|123647,gi|13242237,gi|13399491,gi|16041102,gi|24234686,gi|309319,gi|347019,gi|42542422,gi|428,gi|56403676,gi|5729877,gi|6137547,gi|6137549,gi|62896815,gi|62897129,gi|63101351,gi|6729733,gi|6729825,gi|73954621,gi|73954623,gi|74012289,gi|74012291,gi|74142813,gi|74143862,gi|74181586,gi|74184057,gi|74186087,gi|74190799,gi|74191381,gi|74198978,gi|74208631,gi|74211667,gi|74214176,gi|742…	0	1	4	0	FEELNADLFR	0.548	0
300mM no BAF	PREDICTED: similar to heat shock protein 8 [Rattus norvegicus].	gi|109464859,gi|123647,gi|13242237,gi|13399491,gi|16041102,gi|24234686,gi|309319,gi|347019,gi|42542422,gi|428,gi|56403676,gi|5729877,gi|6137547,gi|6137549,gi|62896815,gi|62897129,gi|63101351,gi|6729733,gi|6729825,gi|73954621,gi|73954623,gi|74012289,gi|74012291,gi|74142813,gi|74143862,gi|74181586,gi|74184057,gi|74186087,gi|74190799,gi|74191381,gi|74198978,gi|74208631,gi|74211667,gi|74214176,gi|742…	0	1	4	0	SQIHDIVLVGGSTR	0.95	0
300mM no BAF	PREDICTED: similar to heat shock protein 8 [Rattus norvegicus].	gi|109464859,gi|123647,gi|13242237,gi|13399491,gi|16041102,gi|24234686,gi|309319,gi|347019,gi|42542422,gi|428,gi|56403676,gi|5729877,gi|6137547,gi|6137549,gi|62896815,gi|62897129,gi|63101351,gi|6729733,gi|6729825,gi|73954621,gi|73954623,gi|74012289,gi|74012291,gi|74142813,gi|74143862,gi|74181586,gi|74184057,gi|74186087,gi|74190799,gi|74191381,gi|74198978,gi|74208631,gi|74211667,gi|74214176,gi|742…	0	1	4	0	TTPSYVAFTDTER	0.95	gi|32451998,gi|40254806,gi|56749085,gi|193983,gi|73853769,gi|6016261,gi|47523308,gi|6729803,gi|50978734,gi|14010867,gi|75077423,gi|56757663,gi|197098904,gi|124339829,gi|124339826,gi|74178877,gi|47059179,gi|42543698,gi|167466173,gi|2495339,gi|386785,gi|4529892,gi|62089222,gi|4529893
300mM no BAF	PREDICTED: similar to Myosin regulatory light chain 2,	gi|109121665,gi|15809016,gi|197100396,gi|2119367,gi|21326175,gi|228542,gi|5453740,gi|57089773,gi|62751407,gi|73961895,gi|74226082,gi|8393781	20440	0.998	3	0.226	DGFIDKEDLHDMLASLGK	0.727	0
300mM no BAF	PREDICTED: similar to Myosin regulatory light chain 2,	gi|109121665,gi|15809016,gi|197100396,gi|2119367,gi|21326175,gi|228542,gi|5453740,gi|57089773,gi|62751407,gi|73961895,gi|74226082,gi|8393781	20440	0.998	3	0.226	FTDEEVDELYR	0.95	0
300mM no BAF	PREDICTED: similar to Myosin regulatory light chain 2,	gi|109121665,gi|15809016,gi|197100396,gi|2119367,gi|21326175,gi|228542,gi|5453740,gi|57089773,gi|62751407,gi|73961895,gi|74226082,gi|8393781	20440	0.998	3	0.226	LNGTDPEDVIR	0.82	0
300mM no BAF	DEAD (Asp-Glu-Ala-Asp) box polypeptide 5 [Pongo abelii]	gi|197099326,gi|226021,gi|33096800,gi|4758138,gi|62089424,gi|73965221,gi|73965223,gi|73965225,gi|73965227,gi|73965229,gi|73965233,gi|73965239,gi|73965241,gi|73965243,gi|74354729,gi|75076425	69131.7	0.998	2	0.0342	APILIATDVASR	0.95	0
300mM no BAF	DEAD (Asp-Glu-Ala-Asp) box polypeptide 5 [Pongo abelii]	gi|197099326,gi|226021,gi|33096800,gi|4758138,gi|62089424,gi|73965221,gi|73965223,gi|73965225,gi|73965227,gi|73965229,gi|73965233,gi|73965239,gi|73965241,gi|73965243,gi|74354729,gi|75076425	69131.7	0.998	2	0.0342	TAQEVETYR	0.95	0
300mM no BAF	PREDICTED: heat shock 70kDa protein 5 (glucose-regulated protein,	gi|109112233,gi|16507237,gi|197101513	72316.7	0.998	2	0.0367	DAGTIAGLNVMR	0.95	0
300mM no BAF	PREDICTED: heat shock 70kDa protein 5 (glucose-regulated protein,	gi|109112233,gi|16507237,gi|197101513	72316.7	0.998	2	0.0367	TWNDPSVQQDIK	0.95	0
300mM no BAF	breakpoint cluster region protein 1 [Homo sapiens]	gi|10120888,gi|3002951,gi|4502389	10000.3	1	3	0.213	AYVVLGQFLVLK	0.95	gi|88953904
300mM no BAF	breakpoint cluster region protein 1 [Homo sapiens]	gi|10120888,gi|3002951,gi|4502389	10000.3	1	3	0.213	DEDLFR	0.926	0
300mM no BAF	breakpoint cluster region protein 1 [Homo sapiens]	gi|10120888,gi|3002951,gi|4502389	10000.3	1	3	0.213	KDEDLFR	0.95	0
300mM no BAF	PREDICTED: similar to structure specific recognition protein 1	gi|109106294,gi|111154063,gi|27502780,gi|4507241,gi|54020668,gi|60552474	81059.6	0.98	2	0.0296	SDHPGISITDLSK	0.95	0
300mM no BAF	PREDICTED: similar to structure specific recognition protein 1	gi|109106294,gi|111154063,gi|27502780,gi|4507241,gi|54020668,gi|60552474	81059.6	0.98	2	0.0296	VALGHGLK	0.597	0
300mM no BAF	ribosomal protein S28 [Cricetulus griseus].	gi|12239511,gi|4506715,gi|45268967	7822.9	0.998	2	0.304	EGDVLTLLESER	0.95	0
300mM no BAF	ribosomal protein S28 [Cricetulus griseus].	gi|12239511,gi|4506715,gi|45268967	7822.9	0.998	2	0.304	VEFMDDTSR	0.95	0
300mM no BAF	histone cluster 1, H2ae [Homo sapiens], gi|19557656|ref|NP_003504.2| histone cluster 1, H2ab [Homo sapiens], gi|30061357|ref|NP_835495.1| histone cluster 1, H2ad [Mus musculus], gi|30061361|ref|NP_835493.1| histone cluster 1, H2ag [Mus musculus], gi|30061363|ref|NP_835496.1| histone cluster 1, H2ac [Mus musculus], gi|30061365|ref|NP_835491.1| histone cluster 1, H2an [Mus musculus], gi|30061367|re…	gi|10645195,gi|10800130,gi|10800144,gi|109069903,gi|109070062,gi|109070072,gi|109095827,gi|109157563,gi|109505979,gi|109505989,gi|12025520,gi|149431856,gi|15617199,gi|157821615,gi|18105045,gi|224567,gi|24638446,gi|28316756,gi|29244126,gi|29553970,gi|30061327,gi|30061371,gi|30061379,gi|32111,gi|387182,gi|4504239,gi|4504245,gi|4504251,gi|51304,gi|57096146,gi|57106965,gi|57110393,gi|57110409,gi|5711…	0	0.908	1	0	AGLQFPVGR	0.95	gi|6912616,gi|109066680,gi|62087582,gi|74195793,gi|4504255,gi|56238118,gi|109500010
300mM no BAF	histone cluster 1, H2ae [Homo sapiens], gi|19557656|ref|NP_003504.2| histone cluster 1, H2ab [Homo sapiens], gi|30061357|ref|NP_835495.1| histone cluster 1, H2ad [Mus musculus], gi|30061361|ref|NP_835493.1| histone cluster 1, H2ag [Mus musculus], gi|30061363|ref|NP_835496.1| histone cluster 1, H2ac [Mus musculus], gi|30061365|ref|NP_835491.1| histone cluster 1, H2an [Mus musculus], gi|30061367|re…	gi|10645195,gi|10800130,gi|10800144,gi|109069903,gi|109070062,gi|109070072,gi|109095827,gi|109157563,gi|109505979,gi|109505989,gi|12025520,gi|149431856,gi|15617199,gi|157821615,gi|18105045,gi|224567,gi|24638446,gi|28316756,gi|29244126,gi|29553970,gi|30061327,gi|30061371,gi|30061379,gi|32111,gi|387182,gi|4504239,gi|4504245,gi|4504251,gi|51304,gi|57096146,gi|57106965,gi|57110393,gi|57110409,gi|5711…	0	0.908	1	0	HLQLAIR	0.842	gi|6912616,gi|109066680,gi|62087582,gi|74195793,gi|4504255,gi|56238118,gi|74207672,gi|109500010
300mM no BAF	histone cluster 1, H2ae [Homo sapiens], gi|19557656|ref|NP_003504.2| histone cluster 1, H2ab [Homo sapiens], gi|30061357|ref|NP_835495.1| histone cluster 1, H2ad [Mus musculus], gi|30061361|ref|NP_835493.1| histone cluster 1, H2ag [Mus musculus], gi|30061363|ref|NP_835496.1| histone cluster 1, H2ac [Mus musculus], gi|30061365|ref|NP_835491.1| histone cluster 1, H2an [Mus musculus], gi|30061367|re…	gi|10645195,gi|10800130,gi|10800144,gi|109069903,gi|109070062,gi|109070072,gi|109095827,gi|109157563,gi|109505979,gi|109505989,gi|12025520,gi|149431856,gi|15617199,gi|157821615,gi|18105045,gi|224567,gi|24638446,gi|28316756,gi|29244126,gi|29553970,gi|30061327,gi|30061371,gi|30061379,gi|32111,gi|387182,gi|4504239,gi|4504245,gi|4504251,gi|51304,gi|57096146,gi|57106965,gi|57110393,gi|57110409,gi|5711…	0	0.908	1	0	VTIAQGGVLPNIQAVLLPK	0.95	0
300mM no BAF	Ribosomal protein L14 [Homo sapiens].	gi|12653649	23485.3	0.908	1	0.0556	LVAIVDVIDQNR	0.95	0
300mM no BAF	PREDICTED: THO complex 4 [Macaca mulatta]	gi|109119121,gi|109492372,gi|109492374,gi|26339222,gi|34810642,gi|48474967,gi|55770864,gi|6755763,gi|68534069,gi|7159943,gi|73964741,gi|78369418	23828.4	0.908	1	0.0505	SLGTADVHFER	0.95	0
300mM no BAF	PREDICTED: similar to 40S ribosomal protein S25 [Rattus	gi|109483864	15890.4	0.908	1	0.0694	LITPAVVSER	0.95	0
300mM no BAF	SRp55-3.	gi|1049086,gi|1049088,gi|20127499,gi|62087532,gi|73992466,gi|78369222	39570.4	1	3	0.0872	DADDAVYELNGK	0.95	0
300mM no BAF	SRp55-3.	gi|1049086,gi|1049088,gi|20127499,gi|62087532,gi|73992466,gi|78369222	39570.4	1	3	0.0872	LIVENLSSR	0.95	0
300mM no BAF	SRp55-3.	gi|1049086,gi|1049088,gi|20127499,gi|62087532,gi|73992466,gi|78369222	39570.4	1	3	0.0872	TNEGVIEFR	0.95	0
300mM no BAF	PREDICTED: similar to small nuclear ribonucleoparticle-associated	gi|109080354,gi|109080392,gi|109092660,gi|109505083,gi|112307,gi|119331232,gi|12643865,gi|134545,gi|190247,gi|206694,gi|207008,gi|3142634,gi|337459,gi|337461,gi|36495,gi|38150007,gi|4507125,gi|4507135,gi|53690154,gi|57045593,gi|5870129,gi|5870130,gi|62896825,gi|6678053,gi|6730226,gi|73950978,gi|75057373,gi|77020260,gi|77736407,gi|86438323	24596.4	0.908	1	0.0625	GENLVSMTVEGPPPK	0.95	0
300mM no BAF	PREDICTED: similar to 60S ribosomal protein L23a [Macaca mulatta].	gi|109076051,gi|109113784,gi|109120362,gi|109148510,gi|109464365,gi|109500504,gi|16741485,gi|17105394,gi|20071865,gi|306549,gi|404015,gi|73950692,gi|76625673,gi|76634831	17535.2	0.99	2	0.122	LDHYAIIK	0.799	0
300mM no BAF	PREDICTED: similar to 60S ribosomal protein L23a [Macaca mulatta].	gi|109076051,gi|109113784,gi|109120362,gi|109148510,gi|109464365,gi|109500504,gi|16741485,gi|17105394,gi|20071865,gi|306549,gi|404015,gi|73950692,gi|76625673,gi|76634831	17535.2	0.99	2	0.122	VNTLIRPDGEK	0.95	0
300mM no BAF	unnamed protein product [Homo sapiens].	gi|21754583,gi|4557701	48088.7	0.998	2	0.118	ASLEGNLAETENR	0.95	0
300mM no BAF	unnamed protein product [Homo sapiens].	gi|21754583,gi|4557701	48088.7	0.998	2	0.118	CEMEQQNQEYK	0.874	gi|15431310,gi|386848,gi|12803709
300mM no BAF	unnamed protein product [Homo sapiens].	gi|21754583,gi|4557701	48088.7	0.998	2	0.118	LASYLDK	0.858	gi|55956899,gi|81175178,gi|24430192,gi|15431310,gi|1195531,gi|386848,gi|28317,gi|21961605,gi|12803709
300mM no BAF	unnamed protein product [Homo sapiens].	gi|21754583,gi|4557701	48088.7	0.998	2	0.118	LEQEIATYR	0.91	gi|24430192,gi|15431310,gi|1195531,gi|386848,gi|12803709
300mM no BAF	unnamed protein product [Homo sapiens].	gi|21754583,gi|4557701	48088.7	0.998	2	0.118	LSGGLGAGSCR	0.95	0
300mM no BAF	PREDICTED: similar to 40S ribosomal protein S6 isoform 1 [Macaca	gi|109111441,gi|109124488,gi|15342049,gi|20381196,gi|225901,gi|26389925,gi|337514,gi|337516,gi|34785048,gi|57101416,gi|62752040,gi|6677809,gi|74177679,gi|82885362,gi|82955311	28663.7	0.995	2	0.0803	DIPGLTDTTVPR	0.95	0
300mM no BAF	PREDICTED: similar to 40S ribosomal protein S6 isoform 1 [Macaca	gi|109111441,gi|109124488,gi|15342049,gi|20381196,gi|225901,gi|26389925,gi|337514,gi|337516,gi|34785048,gi|57101416,gi|62752040,gi|6677809,gi|74177679,gi|82885362,gi|82955311	28663.7	0.995	2	0.0803	LIEVDDER	0.898	0
300mM no BAF	ribosomal protein S5 [Homo sapiens], gi|62751703|ref|NP_001015531.1| ribosomal protein S5 [Bos taurus], gi|57036143|ref|XP_533568.1| PREDICTED: similar to ribosomal protein S5 isoform 1 [Canis familiaris], gi|73946777|ref|XP_861863.1| PREDICTED: similar to ribosomal protein S5 isoform 5 [Canis familiaris], gi|109126282|ref|XP_001096993.1| PREDICTED: similar to ribosomal protein S5 isoform 1 [Maca…	gi|13904870,gi|3088336,gi|3717978,gi|550021,gi|55824584,gi|62897773,gi|73946771,gi|73946773	22759.8	0.908	1	0.0735	TIAECLADELINAAK	0.95	0
300mM no BAF	keratin 1 [Homo sapiens].	gi|11935049	66050.3	1	17	0.3	AEAESLYQSK	0.95	gi|109096823,gi|109096825,gi|109096827,gi|109096829
300mM no BAF	keratin 1 [Homo sapiens].	gi|11935049	66050.3	1	17	0.3	AQYEDIAQK	0.936	0
300mM no BAF	keratin 1 [Homo sapiens].	gi|11935049	66050.3	1	17	0.3	DVDGAYMTK	0.873	0
300mM no BAF	keratin 1 [Homo sapiens].	gi|11935049	66050.3	1	17	0.3	DYQELMNTK	0.95	gi|109096823,gi|109096825,gi|81891716,gi|109096827,gi|109096829
300mM no BAF	keratin 1 [Homo sapiens].	gi|11935049	66050.3	1	17	0.3	FSSCGGGGGSFGAGGGFGSR	0.909	0
300mM no BAF	keratin 1 [Homo sapiens].	gi|11935049	66050.3	1	17	0.3	IEISELNR	0.95	gi|109096823,gi|109096825,gi|47132620,gi|547754,gi|109096827,gi|109096829
300mM no BAF	keratin 1 [Homo sapiens].	gi|11935049	66050.3	1	17	0.3	LNDLEDALQQAK	0.95	gi|109096823,gi|109096825,gi|109096827,gi|109096829
300mM no BAF	keratin 1 [Homo sapiens].	gi|11935049	66050.3	1	17	0.3	MSGECAPNVSVSVSTSHTTISGGGSR	0.95	0
300mM no BAF	keratin 1 [Homo sapiens].	gi|11935049	66050.3	1	17	0.3	NMQDMVEDYR	0.905	gi|109096823,gi|109096825,gi|109096827,gi|109096829
300mM no BAF	keratin 1 [Homo sapiens].	gi|11935049	66050.3	1	17	0.3	QISNLQQSISDAEQR	0.95	0
300mM no BAF	keratin 1 [Homo sapiens].	gi|11935049	66050.3	1	17	0.3	SKAEAESLYQSK	0.95	gi|109096823,gi|109096825,gi|109096827,gi|109096829
300mM no BAF	keratin 1 [Homo sapiens].	gi|11935049	66050.3	1	17	0.3	SLDLDSIIAEVK	0.95	gi|109096823,gi|109096825,gi|109096827,gi|109096829
300mM no BAF	keratin 1 [Homo sapiens].	gi|11935049	66050.3	1	17	0.3	SLNNQFASFIDK	0.95	gi|109096823,gi|109096825,gi|109096827,gi|109096829
300mM no BAF	keratin 1 [Homo sapiens].	gi|11935049	66050.3	1	17	0.3	SLVNLGGSK	0.655	gi|109096823,gi|109096825,gi|109096827,gi|109096829
300mM no BAF	keratin 1 [Homo sapiens].	gi|11935049	66050.3	1	17	0.3	TLLEGEESR	0.891	gi|109096823,gi|109096825,gi|109096827,gi|109096829
300mM no BAF	keratin 1 [Homo sapiens].	gi|11935049	66050.3	1	17	0.3	TNAENEFVTIK	0.95	gi|109096823,gi|109096825,gi|81891716,gi|109096827,gi|109096829
300mM no BAF	keratin 1 [Homo sapiens].	gi|11935049	66050.3	1	17	0.3	YEELQITAGR	0.95	gi|109096781,gi|109096823,gi|109096825,gi|109096827,gi|109096829
300mM no BAF	ribosomal protein S14 [Rattus norvegicus].	gi|12083607,gi|3097244,gi|5032051,gi|5441523,gi|63680339,gi|74226871,gi|82958328	16254.9	0.984	2	0.159	IEDVTPIPSDSTR	0.676	0
300mM no BAF	ribosomal protein S14 [Rattus norvegicus].	gi|12083607,gi|3097244,gi|5032051,gi|5441523,gi|63680339,gi|74226871,gi|82958328	16254.9	0.984	2	0.159	TPGPGAQSALR	0.95	0
300mM no BAF	lamin B1 [Homo sapiens], gi|125953|sp|P20700|LMNB1_HUMAN Lamin-B1, gi|307106|gb|AAA36162.1| lamin B, gi|576840|gb|AAC37575.1| lamin B1 [Homo sapiens], gi|74354337|gb|AAI03724.1| Lamin B1 [Homo sapiens], gi|119569231|gb|EAW48846.1| lamin B1, isoform CRA_b [Homo sapiens], gi|189069155|dbj|BAG35493.1| unnamed protein product [Homo sapiens] [MASS=66408]	gi|5031877	66391.6	0.908	1	0.0392	KLLEGEEER	0.95	gi|27436946,gi|57014043,gi|73987493,gi|74220835,gi|27436951
300mM no BAF	lamin B1 [Homo sapiens], gi|125953|sp|P20700|LMNB1_HUMAN Lamin-B1, gi|307106|gb|AAA36162.1| lamin B, gi|576840|gb|AAC37575.1| lamin B1 [Homo sapiens], gi|74354337|gb|AAI03724.1| Lamin B1 [Homo sapiens], gi|119569231|gb|EAW48846.1| lamin B1, isoform CRA_b [Homo sapiens], gi|189069155|dbj|BAG35493.1| unnamed protein product [Homo sapiens] [MASS=66408]	gi|5031877	66391.6	0.908	1	0.0392	LLEGEEER	0.95	gi|27436946,gi|57014043,gi|73987493,gi|74220835,gi|27436951
300mM no BAF	lamin B1 [Homo sapiens], gi|125953|sp|P20700|LMNB1_HUMAN Lamin-B1, gi|307106|gb|AAA36162.1| lamin B, gi|576840|gb|AAC37575.1| lamin B1 [Homo sapiens], gi|74354337|gb|AAI03724.1| Lamin B1 [Homo sapiens], gi|119569231|gb|EAW48846.1| lamin B1, isoform CRA_b [Homo sapiens], gi|189069155|dbj|BAG35493.1| unnamed protein product [Homo sapiens] [MASS=66408]	gi|5031877	66391.6	0.908	1	0.0392	LSSEMNTSTVNSAR	0.95	0
300mM no BAF	PREDICTED: similar to heterogeneous nuclear ribonucleoprotein A3	gi|109100194,gi|109100196,gi|109100198,gi|157277969,gi|197098694,gi|31559916,gi|34740329,gi|38328278,gi|51769129,gi|55250278,gi|62027493,gi|73959030,gi|73959032,gi|74004682,gi|74004690,gi|74004692,gi|74004694,gi|74004696,gi|74004700,gi|74004702,gi|74004704,gi|74004706,gi|74228812,gi|82801284,gi|82918359,gi|82918363,gi|82956957,gi|82957137,gi|94371439,gi|94400765	39634.2	0.999	3	0.103	DYFEKYGK	0.783	gi|14043070,gi|74204146,gi|149714872,gi|109098438,gi|74220381,gi|73993824,gi|73993822,gi|8393547,gi|85060507,gi|109131409,gi|75517570,gi|38328245,gi|133254,gi|112421201,gi|13436308,gi|4504445,gi|73996141
300mM no BAF	PREDICTED: similar to heterogeneous nuclear ribonucleoprotein A3	gi|109100194,gi|109100196,gi|109100198,gi|157277969,gi|197098694,gi|31559916,gi|34740329,gi|38328278,gi|51769129,gi|55250278,gi|62027493,gi|73959030,gi|73959032,gi|74004682,gi|74004690,gi|74004692,gi|74004694,gi|74004696,gi|74004700,gi|74004702,gi|74004704,gi|74004706,gi|74228812,gi|82801284,gi|82918359,gi|82918363,gi|82956957,gi|82957137,gi|94371439,gi|94400765	39634.2	0.999	3	0.103	EDTEEYNLR	0.95	0
300mM no BAF	PREDICTED: similar to heterogeneous nuclear ribonucleoprotein A3	gi|109100194,gi|109100196,gi|109100198,gi|157277969,gi|197098694,gi|31559916,gi|34740329,gi|38328278,gi|51769129,gi|55250278,gi|62027493,gi|73959030,gi|73959032,gi|74004682,gi|74004690,gi|74004692,gi|74004694,gi|74004696,gi|74004700,gi|74004702,gi|74004704,gi|74004706,gi|74228812,gi|82801284,gi|82918359,gi|82918363,gi|82956957,gi|82957137,gi|94371439,gi|94400765	39634.2	0.999	3	0.103	SSGSPYGGGYGSGGGSGGYGSR	0.95	0
300mM no BAF	RecName: Full=Eukaryotic translation initiation factor 6;	gi|118593822,gi|13785574,gi|41386715,gi|4504771,gi|57104176,gi|73991736	26580.2	0.997	2	0.131	ASFENNCEIGCFAK	0.95	0
300mM no BAF	RecName: Full=Eukaryotic translation initiation factor 6;	gi|118593822,gi|13785574,gi|41386715,gi|4504771,gi|57104176,gi|73991736	26580.2	0.997	2	0.131	HGLLVPNNTTDQELQHIR	0.937	0
300mM no BAF	PREDICTED: similar to ribosomal protein S19 isoform 2 [Macaca	gi|109124932,gi|109483232,gi|12963511,gi|16924231,gi|2500494,gi|38083674,gi|4506695,gi|50981396,gi|56541224,gi|61815543,gi|73948285,gi|82886943,gi|94397093	16410	0.991	2	0.069	RVLQALEGLK	0.858	0
300mM no BAF	PREDICTED: similar to ribosomal protein S19 isoform 2 [Macaca	gi|109124932,gi|109483232,gi|12963511,gi|16924231,gi|2500494,gi|38083674,gi|4506695,gi|50981396,gi|56541224,gi|61815543,gi|73948285,gi|82886943,gi|94397093	16410	0.991	2	0.069	VLQALEGLK	0.939	0
300mM no BAF	PREDICTED: similar to ribosomal protein S18 isoform 1 [Macaca	gi|109073771,gi|149263957,gi|28189422,gi|28189549,gi|6755368,gi|74197062	15380.7	1	3	0.244	AGELTEDEVER	0.95	0
300mM no BAF	PREDICTED: similar to ribosomal protein S18 isoform 1 [Macaca	gi|109073771,gi|149263957,gi|28189422,gi|28189549,gi|6755368,gi|74197062	15380.7	1	3	0.244	VLNTNIDGR	0.95	0
300mM no BAF	PREDICTED: similar to ribosomal protein S18 isoform 1 [Macaca	gi|109073771,gi|149263957,gi|28189422,gi|28189549,gi|6755368,gi|74197062	15380.7	1	3	0.244	YSQVLANGLDNK	0.95	0
300mM no BAF	PREDICTED: similar to ribosomal protein L4 isoform 2 [Macaca mulatta]	gi|109081576,gi|75076107	47690.9	0.908	1	0.0468	AAAAAAALEAK	0.95	0
300mM no BAF	PREDICTED: similar to ribosomal protein L4 isoform 2 [Macaca mulatta]	gi|109081576,gi|75076107	47690.9	0.908	1	0.0468	LDELYGTWR	0.95	gi|62087534,gi|197097764,gi|16579885
300mM no BAF	PREDICTED: similar to ribosomal protein S8 [Macaca mulatta].	gi|109075664,gi|13542987,gi|26353710,gi|27689323,gi|28491531,gi|4506743,gi|73977177,gi|73977179,gi|73977181,gi|73977183,gi|73977185,gi|82922494,gi|94387984	24188.4	0.998	2	0.106	ADGYVLEGK	0.95	0
300mM no BAF	PREDICTED: similar to ribosomal protein S8 [Macaca mulatta].	gi|109075664,gi|13542987,gi|26353710,gi|27689323,gi|28491531,gi|4506743,gi|73977177,gi|73977179,gi|73977181,gi|73977183,gi|73977185,gi|82922494,gi|94387984	24188.4	0.998	2	0.106	ISSLLEEQFQQGK	0.95	0
300mM no BAF	PREDICTED: similar to splicing factor, arginine/serine-rich 7 [Macaca mulatta]	gi|109102749,gi|15928796,gi|20071765,gi|21749793,gi|22122585,gi|26328639,gi|26350021,gi|71162370,gi|72534660,gi|73980752,gi|77735509,gi|84781668	37354.1	0.908	1	0.0365	VYVGNLGTGAGK	0.95	0
300mM no BAF	spectrin, alpha, non-erythrocytic 1 (alpha-fodrin) isoform 2 [Homo sapiens], gi|94730425|sp|Q13813|SPTA2_HUMAN Spectrin alpha chain, brain (Spectrin, non-erythroid alpha chain) (Alpha-II spectrin) (Fodrin alpha chain), gi|55663122|emb|CAH71405.1| spectrin, alpha, non-erythrocytic 1 (alpha-fodrin) [Homo sapiens] [MASS=284537]	gi|154759259,gi|17380501,gi|1805280,gi|194595509,gi|31543764,gi|31565122,gi|47477769,gi|62089306	0	1	6	0	ASAFNSWFENAEEDLTDPVR	0.878	0
300mM no BAF	spectrin, alpha, non-erythrocytic 1 (alpha-fodrin) isoform 2 [Homo sapiens], gi|94730425|sp|Q13813|SPTA2_HUMAN Spectrin alpha chain, brain (Spectrin, non-erythroid alpha chain) (Alpha-II spectrin) (Fodrin alpha chain), gi|55663122|emb|CAH71405.1| spectrin, alpha, non-erythrocytic 1 (alpha-fodrin) [Homo sapiens] [MASS=284537]	gi|154759259,gi|17380501,gi|1805280,gi|194595509,gi|31543764,gi|31565122,gi|47477769,gi|62089306	0	1	6	0	DCEQAENWMAAR	0.95	0
300mM no BAF	spectrin, alpha, non-erythrocytic 1 (alpha-fodrin) isoform 2 [Homo sapiens], gi|94730425|sp|Q13813|SPTA2_HUMAN Spectrin alpha chain, brain (Spectrin, non-erythroid alpha chain) (Alpha-II spectrin) (Fodrin alpha chain), gi|55663122|emb|CAH71405.1| spectrin, alpha, non-erythrocytic 1 (alpha-fodrin) [Homo sapiens] [MASS=284537]	gi|154759259,gi|17380501,gi|1805280,gi|194595509,gi|31543764,gi|31565122,gi|47477769,gi|62089306	0	1	6	0	IDGITIQAR	0.95	0
300mM no BAF	spectrin, alpha, non-erythrocytic 1 (alpha-fodrin) isoform 2 [Homo sapiens], gi|94730425|sp|Q13813|SPTA2_HUMAN Spectrin alpha chain, brain (Spectrin, non-erythroid alpha chain) (Alpha-II spectrin) (Fodrin alpha chain), gi|55663122|emb|CAH71405.1| spectrin, alpha, non-erythrocytic 1 (alpha-fodrin) [Homo sapiens] [MASS=284537]	gi|154759259,gi|17380501,gi|1805280,gi|194595509,gi|31543764,gi|31565122,gi|47477769,gi|62089306	0	1	6	0	SSEEIESAFR	0.95	0
300mM no BAF	spectrin, alpha, non-erythrocytic 1 (alpha-fodrin) isoform 2 [Homo sapiens], gi|94730425|sp|Q13813|SPTA2_HUMAN Spectrin alpha chain, brain (Spectrin, non-erythroid alpha chain) (Alpha-II spectrin) (Fodrin alpha chain), gi|55663122|emb|CAH71405.1| spectrin, alpha, non-erythrocytic 1 (alpha-fodrin) [Homo sapiens] [MASS=284537]	gi|154759259,gi|17380501,gi|1805280,gi|194595509,gi|31543764,gi|31565122,gi|47477769,gi|62089306	0	1	6	0	VLETAEDIQER	0.95	0
300mM no BAF	spectrin, alpha, non-erythrocytic 1 (alpha-fodrin) isoform 2 [Homo sapiens], gi|94730425|sp|Q13813|SPTA2_HUMAN Spectrin alpha chain, brain (Spectrin, non-erythroid alpha chain) (Alpha-II spectrin) (Fodrin alpha chain), gi|55663122|emb|CAH71405.1| spectrin, alpha, non-erythrocytic 1 (alpha-fodrin) [Homo sapiens] [MASS=284537]	gi|154759259,gi|17380501,gi|1805280,gi|194595509,gi|31543764,gi|31565122,gi|47477769,gi|62089306	0	1	6	0	VNDVCTNGQDLIK	0.65	0
300mM no BAF	myosin, heavy polypeptide 9, non-muscle [Homo sapiens], gi|6166599|sp|P35579.4|MYH9_HUMAN Myosin-9 (Myosin heavy chain 9) (Myosin heavy chain, non-muscle IIa) (Non-muscle myosin heavy chain IIa) (NMMHC II-a) (NMMHC-IIA) (Cellular myosin heavy chain, type A) (Non-muscle myosin heavy chain-A) (NMMHC-A), gi|3169000|emb|CAB05105.1| myosin, heavy chain 9, non-muscle [Homo sapiens], gi|47678583|emb|CAG…	gi|12667788	226520	1	15	0.0949	ADFCIIHYAGK	0.58	gi|30268331
300mM no BAF	myosin, heavy polypeptide 9, non-muscle [Homo sapiens], gi|6166599|sp|P35579.4|MYH9_HUMAN Myosin-9 (Myosin heavy chain 9) (Myosin heavy chain, non-muscle IIa) (Non-muscle myosin heavy chain IIa) (NMMHC II-a) (NMMHC-IIA) (Cellular myosin heavy chain, type A) (Non-muscle myosin heavy chain-A) (NMMHC-A), gi|3169000|emb|CAB05105.1| myosin, heavy chain 9, non-muscle [Homo sapiens], gi|47678583|emb|CAG…	gi|12667788	226520	1	15	0.0949	ALEEAMEQK	0.95	gi|30268331
300mM no BAF	myosin, heavy polypeptide 9, non-muscle [Homo sapiens], gi|6166599|sp|P35579.4|MYH9_HUMAN Myosin-9 (Myosin heavy chain 9) (Myosin heavy chain, non-muscle IIa) (Non-muscle myosin heavy chain IIa) (NMMHC II-a) (NMMHC-IIA) (Cellular myosin heavy chain, type A) (Non-muscle myosin heavy chain-A) (NMMHC-A), gi|3169000|emb|CAB05105.1| myosin, heavy chain 9, non-muscle [Homo sapiens], gi|47678583|emb|CAG…	gi|12667788	226520	1	15	0.0949	ASITALEAK	0.95	gi|30268331
300mM no BAF	myosin, heavy polypeptide 9, non-muscle [Homo sapiens], gi|6166599|sp|P35579.4|MYH9_HUMAN Myosin-9 (Myosin heavy chain 9) (Myosin heavy chain, non-muscle IIa) (Non-muscle myosin heavy chain IIa) (NMMHC II-a) (NMMHC-IIA) (Cellular myosin heavy chain, type A) (Non-muscle myosin heavy chain-A) (NMMHC-A), gi|3169000|emb|CAB05105.1| myosin, heavy chain 9, non-muscle [Homo sapiens], gi|47678583|emb|CAG…	gi|12667788	226520	1	15	0.0949	DELADEIANSSGK	0.95	gi|30268331
300mM no BAF	myosin, heavy polypeptide 9, non-muscle [Homo sapiens], gi|6166599|sp|P35579.4|MYH9_HUMAN Myosin-9 (Myosin heavy chain 9) (Myosin heavy chain, non-muscle IIa) (Non-muscle myosin heavy chain IIa) (NMMHC II-a) (NMMHC-IIA) (Cellular myosin heavy chain, type A) (Non-muscle myosin heavy chain-A) (NMMHC-A), gi|3169000|emb|CAB05105.1| myosin, heavy chain 9, non-muscle [Homo sapiens], gi|47678583|emb|CAG…	gi|12667788	226520	1	15	0.0949	DLEAHIDSANK	0.95	gi|30268331
300mM no BAF	myosin, heavy polypeptide 9, non-muscle [Homo sapiens], gi|6166599|sp|P35579.4|MYH9_HUMAN Myosin-9 (Myosin heavy chain 9) (Myosin heavy chain, non-muscle IIa) (Non-muscle myosin heavy chain IIa) (NMMHC II-a) (NMMHC-IIA) (Cellular myosin heavy chain, type A) (Non-muscle myosin heavy chain-A) (NMMHC-A), gi|3169000|emb|CAB05105.1| myosin, heavy chain 9, non-muscle [Homo sapiens], gi|47678583|emb|CAG…	gi|12667788	226520	1	15	0.0949	EDQSILCTGESGAGK	0.95	gi|30268331
300mM no BAF	myosin, heavy polypeptide 9, non-muscle [Homo sapiens], gi|6166599|sp|P35579.4|MYH9_HUMAN Myosin-9 (Myosin heavy chain 9) (Myosin heavy chain, non-muscle IIa) (Non-muscle myosin heavy chain IIa) (NMMHC II-a) (NMMHC-IIA) (Cellular myosin heavy chain, type A) (Non-muscle myosin heavy chain-A) (NMMHC-A), gi|3169000|emb|CAB05105.1| myosin, heavy chain 9, non-muscle [Homo sapiens], gi|47678583|emb|CAG…	gi|12667788	226520	1	15	0.0949	ELEDATETADAMNR	0.95	0
300mM no BAF	myosin, heavy polypeptide 9, non-muscle [Homo sapiens], gi|6166599|sp|P35579.4|MYH9_HUMAN Myosin-9 (Myosin heavy chain 9) (Myosin heavy chain, non-muscle IIa) (Non-muscle myosin heavy chain IIa) (NMMHC II-a) (NMMHC-IIA) (Cellular myosin heavy chain, type A) (Non-muscle myosin heavy chain-A) (NMMHC-A), gi|3169000|emb|CAB05105.1| myosin, heavy chain 9, non-muscle [Homo sapiens], gi|47678583|emb|CAG…	gi|12667788	226520	1	15	0.0949	IAQLEEQLDNETK	0.95	gi|30268331
300mM no BAF	myosin, heavy polypeptide 9, non-muscle [Homo sapiens], gi|6166599|sp|P35579.4|MYH9_HUMAN Myosin-9 (Myosin heavy chain 9) (Myosin heavy chain, non-muscle IIa) (Non-muscle myosin heavy chain IIa) (NMMHC II-a) (NMMHC-IIA) (Cellular myosin heavy chain, type A) (Non-muscle myosin heavy chain-A) (NMMHC-A), gi|3169000|emb|CAB05105.1| myosin, heavy chain 9, non-muscle [Homo sapiens], gi|47678583|emb|CAG…	gi|12667788	226520	1	15	0.0949	KFDQLLAEEK	0.95	gi|30268331
300mM no BAF	myosin, heavy polypeptide 9, non-muscle [Homo sapiens], gi|6166599|sp|P35579.4|MYH9_HUMAN Myosin-9 (Myosin heavy chain 9) (Myosin heavy chain, non-muscle IIa) (Non-muscle myosin heavy chain IIa) (NMMHC II-a) (NMMHC-IIA) (Cellular myosin heavy chain, type A) (Non-muscle myosin heavy chain-A) (NMMHC-A), gi|3169000|emb|CAB05105.1| myosin, heavy chain 9, non-muscle [Homo sapiens], gi|47678583|emb|CAG…	gi|12667788	226520	1	15	0.0949	MEDSVGCLETAEEVK	0.887	0
300mM no BAF	myosin, heavy polypeptide 9, non-muscle [Homo sapiens], gi|6166599|sp|P35579.4|MYH9_HUMAN Myosin-9 (Myosin heavy chain 9) (Myosin heavy chain, non-muscle IIa) (Non-muscle myosin heavy chain IIa) (NMMHC II-a) (NMMHC-IIA) (Cellular myosin heavy chain, type A) (Non-muscle myosin heavy chain-A) (NMMHC-A), gi|3169000|emb|CAB05105.1| myosin, heavy chain 9, non-muscle [Homo sapiens], gi|47678583|emb|CAG…	gi|12667788	226520	1	15	0.0949	NTDQASMPDNTAAQK	0.95	gi|30268331
300mM no BAF	myosin, heavy polypeptide 9, non-muscle [Homo sapiens], gi|6166599|sp|P35579.4|MYH9_HUMAN Myosin-9 (Myosin heavy chain 9) (Myosin heavy chain, non-muscle IIa) (Non-muscle myosin heavy chain IIa) (NMMHC II-a) (NMMHC-IIA) (Cellular myosin heavy chain, type A) (Non-muscle myosin heavy chain-A) (NMMHC-A), gi|3169000|emb|CAB05105.1| myosin, heavy chain 9, non-muscle [Homo sapiens], gi|47678583|emb|CAG…	gi|12667788	226520	1	15	0.0949	QLLQANPILEAFGNAK	0.95	gi|30268331
300mM no BAF	myosin, heavy polypeptide 9, non-muscle [Homo sapiens], gi|6166599|sp|P35579.4|MYH9_HUMAN Myosin-9 (Myosin heavy chain 9) (Myosin heavy chain, non-muscle IIa) (Non-muscle myosin heavy chain IIa) (NMMHC II-a) (NMMHC-IIA) (Cellular myosin heavy chain, type A) (Non-muscle myosin heavy chain-A) (NMMHC-A), gi|3169000|emb|CAB05105.1| myosin, heavy chain 9, non-muscle [Homo sapiens], gi|47678583|emb|CAG…	gi|12667788	226520	1	15	0.0949	THEAQIQEMR	0.658	0
300mM no BAF	myosin, heavy polypeptide 9, non-muscle [Homo sapiens], gi|6166599|sp|P35579.4|MYH9_HUMAN Myosin-9 (Myosin heavy chain 9) (Myosin heavy chain, non-muscle IIa) (Non-muscle myosin heavy chain IIa) (NMMHC II-a) (NMMHC-IIA) (Cellular myosin heavy chain, type A) (Non-muscle myosin heavy chain-A) (NMMHC-A), gi|3169000|emb|CAB05105.1| myosin, heavy chain 9, non-muscle [Homo sapiens], gi|47678583|emb|CAG…	gi|12667788	226520	1	15	0.0949	VEAQLQELQVK	0.95	0
300mM no BAF	myosin, heavy polypeptide 9, non-muscle [Homo sapiens], gi|6166599|sp|P35579.4|MYH9_HUMAN Myosin-9 (Myosin heavy chain 9) (Myosin heavy chain, non-muscle IIa) (Non-muscle myosin heavy chain IIa) (NMMHC II-a) (NMMHC-IIA) (Cellular myosin heavy chain, type A) (Non-muscle myosin heavy chain-A) (NMMHC-A), gi|3169000|emb|CAB05105.1| myosin, heavy chain 9, non-muscle [Homo sapiens], gi|47678583|emb|CAG…	gi|12667788	226520	1	15	0.0949	VISGVLQLGNIVFK	0.95	gi|30268331
300mM no BAF	beta-actin [Mustela putorius furo]	gi|2724046	35820.4	0.908	1	0.183	EITALAPSTMK	0.95	gi|15277503,gi|66735458,gi|1351867,gi|62897409,gi|14250401,gi|73964667,gi|2318133,gi|73958059,gi|74151948,gi|62897625,gi|809561,gi|74191399,gi|74190672,gi|60389477,gi|109492380,gi|73958065,gi|73958067,gi|74191566,gi|74191564,gi|74213524,gi|47116231,gi|45269029,gi|16924319,gi|62897671,gi|67971314,gi|74187644,gi|197099682,gi|4501887,gi|4501885,gi|28336
300mM no BAF	beta-actin [Mustela putorius furo]	gi|2724046	35820.4	0.908	1	0.183	QEYDESGPSIVHR	0.95	gi|15277503,gi|66735458,gi|1351867,gi|62897409,gi|74178273,gi|14250401,gi|73964667,gi|2318133,gi|73958059,gi|74151948,gi|62897625,gi|809561,gi|74191399,gi|74190672,gi|60389477,gi|109492380,gi|73958065,gi|73958067,gi|74191566,gi|74191564,gi|74213524,gi|47116231,gi|45269029,gi|16924319,gi|62897671,gi|67971314,gi|74187644,gi|197099682,gi|4501887,gi|4501885,gi|28336
300mM no BAF	beta-actin [Mustela putorius furo]	gi|2724046	35820.4	0.908	1	0.183	TVLSGGTTMYPGIADR	0.95	0
300mM no BAF	beta-actin [Mustela putorius furo]	gi|2724046	35820.4	0.908	1	0.183	VAPEEHPVLLTEAPLNPK	0.95	gi|15277503,gi|66735458,gi|1351867,gi|62897409,gi|14250401,gi|73964667,gi|2318133,gi|73958059,gi|74151948,gi|62897625,gi|809561,gi|74191399,gi|74190672,gi|60389477,gi|109492380,gi|73958065,gi|73958067,gi|74191566,gi|74191564,gi|74213524,gi|47116231,gi|45269029,gi|16924319,gi|62897671,gi|67971314,gi|74187644,gi|197099682,gi|4501887,gi|4501885,gi|28336
300mM no BAF	ribosomal protein L4 [Homo sapiens], gi|114657764|ref|XP_001174726.1| PREDICTED: similar to ribosomal protein isoform 2 [Pan troglodytes], gi|22002063|sp|P36578|RL4_HUMAN 60S ribosomal protein L4 (L1), gi|432359|dbj|BAA04887.1| ribosomal protein [Homo sapiens], gi|12655035|gb|AAH01365.1| Ribosomal protein L4 [Homo sapiens], gi|13543304|gb|AAH05817.1| Ribosomal protein L4 [Homo sapiens], gi|140435…	gi|16579885,gi|197097764,gi|62087534	47681.1	0.908	1	0.0211	LDELYGTWR	0.95	gi|75076107,gi|109081576
300mM no BAF	PREDICTED: similar to eukaryotic translation elongation factor 1	gi|109071712,gi|109071714,gi|109071716,gi|109107440,gi|109107442,gi|197102737,gi|4503471,gi|48734733,gi|48734966,gi|55824554,gi|56403849,gi|62896589,gi|62896605,gi|62896661,gi|62897525,gi|62897621,gi|62897653,gi|73994092,gi|74001312,gi|74746925	50123.2	0.908	1	0.0238	IGGIGTVPVGR	0.95	0
300mM no BAF	PREDICTED: scaffold attachment factor B2 isoform 3 [Macaca	gi|109123038,gi|109123040,gi|109123042,gi|19263680,gi|40788876,gi|7661936	107456	0.998	2	0.0399	NLWVSGLSSTTR	0.95	0
300mM no BAF	PREDICTED: scaffold attachment factor B2 isoform 3 [Macaca	gi|109123038,gi|109123040,gi|109123042,gi|19263680,gi|40788876,gi|7661936	107456	0.998	2	0.0399	SEPVKEESSELEQPFAQDTSSVGPDR	0.95	0
300mM no BAF	PREDICTED: similar to ribosomal protein L3 isoform a isoform 5	gi|109080468,gi|109080470,gi|149270989,gi|337580,gi|38454246,gi|4506649,gi|74181618,gi|74185237,gi|74185347,gi|74191638,gi|75076108,gi|76496472,gi|94404874	46091.5	1	5	0.119	AGMTHIVR	0.51	0
300mM no BAF	PREDICTED: similar to ribosomal protein L3 isoform a isoform 5	gi|109080468,gi|109080470,gi|149270989,gi|337580,gi|38454246,gi|4506649,gi|74181618,gi|74185237,gi|74185347,gi|74191638,gi|75076108,gi|76496472,gi|94404874	46091.5	1	5	0.119	HGSLGFLPR	0.95	0
300mM no BAF	PREDICTED: similar to ribosomal protein L3 isoform a isoform 5	gi|109080468,gi|109080470,gi|149270989,gi|337580,gi|38454246,gi|4506649,gi|74181618,gi|74185237,gi|74185347,gi|74191638,gi|75076108,gi|76496472,gi|94404874	46091.5	1	5	0.119	NNASTDYDLSDK	0.95	0
300mM no BAF	PREDICTED: similar to ribosomal protein L3 isoform a isoform 5	gi|109080468,gi|109080470,gi|149270989,gi|337580,gi|38454246,gi|4506649,gi|74181618,gi|74185237,gi|74185347,gi|74191638,gi|75076108,gi|76496472,gi|94404874	46091.5	1	5	0.119	TVFAEHISDECK	0.95	0
300mM no BAF	PREDICTED: similar to ribosomal protein L3 isoform a isoform 5	gi|109080468,gi|109080470,gi|149270989,gi|337580,gi|38454246,gi|4506649,gi|74181618,gi|74185237,gi|74185347,gi|74191638,gi|75076108,gi|76496472,gi|94404874	46091.5	1	5	0.119	VAFSVAR	0.546	0
300mM no BAF	Splicing factor proline/glutamine-rich (polypyrimidine tract	gi|29881667,gi|38014635,gi|4826998	76131.5	1	6	0.136	ANLSLLR	0.95	0
300mM no BAF	Splicing factor proline/glutamine-rich (polypyrimidine tract	gi|29881667,gi|38014635,gi|4826998	76131.5	1	6	0.136	AVVIVDDR	0.884	gi|407308,gi|74007632,gi|67970671,gi|34932414,gi|74007640,gi|114053303,gi|74007642
300mM no BAF	Splicing factor proline/glutamine-rich (polypyrimidine tract	gi|29881667,gi|38014635,gi|4826998	76131.5	1	6	0.136	FGQGGAGPVGGQGPR	0.792	0
300mM no BAF	Splicing factor proline/glutamine-rich (polypyrimidine tract	gi|29881667,gi|38014635,gi|4826998	76131.5	1	6	0.136	ISDSEGFK	0.757	0
300mM no BAF	Splicing factor proline/glutamine-rich (polypyrimidine tract	gi|29881667,gi|38014635,gi|4826998	76131.5	1	6	0.136	LFVGNLPADITEDEFK	0.95	0
300mM no BAF	Splicing factor proline/glutamine-rich (polypyrimidine tract	gi|29881667,gi|38014635,gi|4826998	76131.5	1	6	0.136	MGGGGAMNMGDPYGSGGQK	0.827	0
300mM no BAF	Splicing factor proline/glutamine-rich (polypyrimidine tract	gi|29881667,gi|38014635,gi|4826998	76131.5	1	6	0.136	NLSPYVSNELLEEAFSQFGPIER	0.95	0
300mM no BAF	PREDICTED: similar to ribosomal protein L27a [Macaca mulatta].	gi|109065734,gi|109099454,gi|109107414,gi|109486518,gi|109512932,gi|1263104,gi|13509323,gi|18042923,gi|27720149,gi|42542700,gi|4506625,gi|55627598,gi|55824568,gi|61553490,gi|62647248,gi|66792780,gi|78486560,gi|82933068,gi|82995837,gi|83638540	16430.2	0.998	2	0.155	NQSFCPTVNLDK	0.95	0
300mM no BAF	PREDICTED: similar to ribosomal protein L27a [Macaca mulatta].	gi|109065734,gi|109099454,gi|109107414,gi|109486518,gi|109512932,gi|1263104,gi|13509323,gi|18042923,gi|27720149,gi|42542700,gi|4506625,gi|55627598,gi|55824568,gi|61553490,gi|62647248,gi|66792780,gi|78486560,gi|82933068,gi|82995837,gi|83638540	16430.2	0.998	2	0.155	TGAAPIIDVVR	0.95	0
300mM no BAF	PREDICTED: similar to Myosin light polypeptide 6 (Smooth muscle and	gi|109067280,gi|109097255,gi|109097259,gi|109097265,gi|155369650,gi|17986258,gi|33620739,gi|435585,gi|467828,gi|73968363,gi|94363353	0	0.996	2	0	ALGQNPTNAEVLK	0.915	0
300mM no BAF	PREDICTED: similar to Myosin light polypeptide 6 (Smooth muscle and	gi|109067280,gi|109097255,gi|109097259,gi|109097265,gi|155369650,gi|17986258,gi|33620739,gi|435585,gi|467828,gi|73968363,gi|94363353	0	0.996	2	0	ILYSQCGDVMR	0.95	0
300mM no BAF	PREDICTED: similar to 40S ribosomal protein S10 isoform 1 [Macaca	gi|109089349,gi|109096350,gi|13399310,gi|4506679,gi|55650572,gi|57107825,gi|62087910,gi|62652203,gi|62655953,gi|73965403,gi|74198792,gi|9581772	27687.8	0.908	1	0.0574	AEAGAGSATEFQFR	0.95	0
300mM no BAF	PREDICTED: similar to ribosomal protein S3a [Macaca mulatta]	gi|109010317,gi|4506723,gi|45219787,gi|47117870,gi|50402817,gi|57104928,gi|57106406,gi|73948829,gi|73949672,gi|73949674,gi|73977909,gi|73977911,gi|73993426,gi|73996740,gi|74001667,gi|74006672,gi|74006674,gi|75075866	24177.6	0.987	2	0.0981	APAMFNIR	0.95	0
300mM no BAF	PREDICTED: similar to ribosomal protein S3a [Macaca mulatta]	gi|109010317,gi|4506723,gi|45219787,gi|47117870,gi|50402817,gi|57104928,gi|57106406,gi|73948829,gi|73949672,gi|73949674,gi|73977909,gi|73977911,gi|73993426,gi|73996740,gi|74001667,gi|74006672,gi|74006674,gi|75075866	24177.6	0.987	2	0.0981	LMELHGEGSSSGK	0.734	0
300mM no BAF	PREDICTED: spectrin, beta, non-erythrocytic 1 isoform 4 [Macaca mulatta]	gi|109102941,gi|109102943,gi|109102945,gi|338443,gi|62089082,gi|62988842,gi|73969626	274617	1	8	0.0415	AKDEQSAVSMLK	0.95	0
300mM no BAF	PREDICTED: spectrin, beta, non-erythrocytic 1 isoform 4 [Macaca mulatta]	gi|109102941,gi|109102943,gi|109102945,gi|338443,gi|62089082,gi|62988842,gi|73969626	274617	1	8	0.0415	ALVADSHPESER	0.95	0
300mM no BAF	PREDICTED: spectrin, beta, non-erythrocytic 1 isoform 4 [Macaca mulatta]	gi|109102941,gi|109102943,gi|109102945,gi|338443,gi|62089082,gi|62988842,gi|73969626	274617	1	8	0.0415	FESLEPEMNNQASR	0.848	0
300mM no BAF	PREDICTED: spectrin, beta, non-erythrocytic 1 isoform 4 [Macaca mulatta]	gi|109102941,gi|109102943,gi|109102945,gi|338443,gi|62089082,gi|62988842,gi|73969626	274617	1	8	0.0415	LLEVLSGER	0.509	0
300mM no BAF	PREDICTED: spectrin, beta, non-erythrocytic 1 isoform 4 [Macaca mulatta]	gi|109102941,gi|109102943,gi|109102945,gi|338443,gi|62089082,gi|62988842,gi|73969626	274617	1	8	0.0415	TALPAQSAATLPAR	0.942	0
300mM no BAF	PREDICTED: spectrin, beta, non-erythrocytic 1 isoform 4 [Macaca mulatta]	gi|109102941,gi|109102943,gi|109102945,gi|338443,gi|62089082,gi|62988842,gi|73969626	274617	1	8	0.0415	TQTAIASEDMPNTLTEAEK	0.95	0
300mM no BAF	PREDICTED: spectrin, beta, non-erythrocytic 1 isoform 4 [Macaca mulatta]	gi|109102941,gi|109102943,gi|109102945,gi|338443,gi|62089082,gi|62988842,gi|73969626	274617	1	8	0.0415	VAVVNQIAR	0.906	0
300mM no BAF	PREDICTED: spectrin, beta, non-erythrocytic 1 isoform 4 [Macaca mulatta]	gi|109102941,gi|109102943,gi|109102945,gi|338443,gi|62089082,gi|62988842,gi|73969626	274617	1	8	0.0415	VQAVVAVAR	0.871	0
300mM no BAF	PREDICTED: similar to 60S ribosomal protein L7a [Macaca mulatta].	gi|109090266,gi|109103256,gi|109103258,gi|109121017,gi|21070334,gi|30410942,gi|40796182,gi|4506661,gi|59808713,gi|62642554,gi|7305443,gi|82930638,gi|82956648,gi|94386298,gi|94966839	29978.3	1	4	0.199	AGVNTVTTLVENK	0.95	0
300mM no BAF	PREDICTED: similar to 60S ribosomal protein L7a [Macaca mulatta].	gi|109090266,gi|109103256,gi|109103258,gi|109121017,gi|21070334,gi|30410942,gi|40796182,gi|4506661,gi|59808713,gi|62642554,gi|7305443,gi|82930638,gi|82956648,gi|94386298,gi|94966839	29978.3	1	4	0.199	NFGIGQDIQPK	0.95	0
300mM no BAF	PREDICTED: similar to 60S ribosomal protein L7a [Macaca mulatta].	gi|109090266,gi|109103256,gi|109103258,gi|109121017,gi|21070334,gi|30410942,gi|40796182,gi|4506661,gi|59808713,gi|62642554,gi|7305443,gi|82930638,gi|82956648,gi|94386298,gi|94966839	29978.3	1	4	0.199	TCTTVAFTQVNSEDK	0.95	0
300mM no BAF	PREDICTED: similar to 60S ribosomal protein L7a [Macaca mulatta].	gi|109090266,gi|109103256,gi|109103258,gi|109121017,gi|21070334,gi|30410942,gi|40796182,gi|4506661,gi|59808713,gi|62642554,gi|7305443,gi|82930638,gi|82956648,gi|94386298,gi|94966839	29978.3	1	4	0.199	VPPAINQFTQALDR	0.95	0
300mM no BAF	55 kd protein [Homo sapiens]	gi|114155142,gi|1296798,gi|1730009,gi|1850342,gi|37258,gi|37405,gi|62020217,gi|63100311,gi|73961225	265580	0.908	1	0.00511	LDELQASDVSVK	0.95	0
300mM no BAF	PREDICTED: heterogeneous nuclear ribonucleoprotein H1 isoform 8	gi|109080068,gi|109080082,gi|109080084,gi|109131562,gi|109131570,gi|109131572,gi|10946928,gi|115496520,gi|16876910,gi|18605870,gi|19527048,gi|20073357,gi|20987708,gi|26345420,gi|26353116,gi|48145673,gi|4826760,gi|5031753,gi|51476543,gi|57107167,gi|57112267,gi|58476100,gi|62078769,gi|62460420,gi|62510677,gi|67971142,gi|73970355,gi|73970359,gi|73970367,gi|73970369,gi|73970371,gi|73970373,gi|7397037…	49246.1	0.908	1	0.0223	VHIEIGPDGR	0.95	0
300mM no BAF	PREDICTED: hypothetical protein [Mus musculus]	gi|94392404	27486.4	1	4	0.151	DDLHQVSKK	0.865	0
300mM no BAF	PREDICTED: hypothetical protein [Mus musculus]	gi|94392404	27486.4	1	4	0.151	QNLIEELR	0.887	0
300mM no BAF	PREDICTED: hypothetical protein [Mus musculus]	gi|94392404	27486.4	1	4	0.151	TKEEVNEWFTK	0.908	0
300mM no BAF	PREDICTED: hypothetical protein [Mus musculus]	gi|94392404	27486.4	1	4	0.151	VMMVALGR	0.905	0
300mM no BAF	Putative RNA methyltransferase NOL1 (Proliferating-cell nucleolar antigen p120) (Proliferation-associated nucleolar protein p120), gi|12653741|gb|AAH00656.1| NOL1 protein [Homo sapiens], gi|118764015|gb|AAI28184.1| NOL1 protein [Homo sapiens] [MASS=89301]	gi|146289861,gi|189422,gi|287723,gi|76779860	0	0.998	2	0	GISAGAVQTAGK	0.95	0
300mM no BAF	Putative RNA methyltransferase NOL1 (Proliferating-cell nucleolar antigen p120) (Proliferation-associated nucleolar protein p120), gi|12653741|gb|AAH00656.1| NOL1 protein [Homo sapiens], gi|118764015|gb|AAI28184.1| NOL1 protein [Homo sapiens] [MASS=89301]	gi|146289861,gi|189422,gi|287723,gi|76779860	0	0.998	2	0	TQASSSFQDSSQPAGK	0.95	0
300mM no BAF	PREDICTED: similar to dermcidin preproprotein [Macaca mulatta].	gi|109096991,gi|16751921	11266.1	0.908	1	0.1	ENAGEDPGLAR	0.95	0
300mM no BAF	RNA binding motif protein, X chromosome retrogene-like [Rattus	gi|157823451,gi|21755396,gi|3256007,gi|542850,gi|56699409,gi|6755296,gi|67969238,gi|71043834,gi|83699420	42284.7	1	4	0.113	ALEAVFGK	0.92	0
300mM no BAF	RNA binding motif protein, X chromosome retrogene-like [Rattus	gi|157823451,gi|21755396,gi|3256007,gi|542850,gi|56699409,gi|6755296,gi|67969238,gi|71043834,gi|83699420	42284.7	1	4	0.113	DSYESYGNSR	0.805	0
300mM no BAF	RNA binding motif protein, X chromosome retrogene-like [Rattus	gi|157823451,gi|21755396,gi|3256007,gi|542850,gi|56699409,gi|6755296,gi|67969238,gi|71043834,gi|83699420	42284.7	1	4	0.113	LFIGGLNTETNEK	0.95	0
300mM no BAF	RNA binding motif protein, X chromosome retrogene-like [Rattus	gi|157823451,gi|21755396,gi|3256007,gi|542850,gi|56699409,gi|6755296,gi|67969238,gi|71043834,gi|83699420	42284.7	1	4	0.113	VEQATKPSFESGR	0.95	0
300mM no BAF	ribosomal protein L6 [Homo sapiens], gi|67189747|ref|NP_001019833.1| ribosomal protein L6 [Homo sapiens], gi|55638981|ref|XP_509392.1| PREDICTED: similar to DNA-binding protein TAXREB107 isoform 12 [Pan troglodytes], gi|114647051|ref|XP_001150295.1| PREDICTED: similar to DNA-binding protein TAXREB107 isoform 6 [Pan troglodytes], gi|114647054|ref|XP_001150611.1| PREDICTED: similar to DNA-binding p…	gi|109089644,gi|109090725,gi|1490384,gi|162287391,gi|16753227,gi|18490263,gi|21410970,gi|36138,gi|38511552,gi|38571759,gi|546831,gi|62651201,gi|695638,gi|73994631,gi|82880886,gi|82999317,gi|84662736,gi|9488975,gi|9802306	32653	0.996	3	0.0938	HQEGEIFDTEK	0.95	0
300mM no BAF	ribosomal protein L6 [Homo sapiens], gi|67189747|ref|NP_001019833.1| ribosomal protein L6 [Homo sapiens], gi|55638981|ref|XP_509392.1| PREDICTED: similar to DNA-binding protein TAXREB107 isoform 12 [Pan troglodytes], gi|114647051|ref|XP_001150295.1| PREDICTED: similar to DNA-binding protein TAXREB107 isoform 6 [Pan troglodytes], gi|114647054|ref|XP_001150611.1| PREDICTED: similar to DNA-binding p…	gi|109089644,gi|109090725,gi|1490384,gi|162287391,gi|16753227,gi|18490263,gi|21410970,gi|36138,gi|38511552,gi|38571759,gi|546831,gi|62651201,gi|695638,gi|73994631,gi|82880886,gi|82999317,gi|84662736,gi|9488975,gi|9802306	32653	0.996	3	0.0938	YEITEQR	0.82	0
300mM no BAF	ribosomal protein L6 [Homo sapiens], gi|67189747|ref|NP_001019833.1| ribosomal protein L6 [Homo sapiens], gi|55638981|ref|XP_509392.1| PREDICTED: similar to DNA-binding protein TAXREB107 isoform 12 [Pan troglodytes], gi|114647051|ref|XP_001150295.1| PREDICTED: similar to DNA-binding protein TAXREB107 isoform 6 [Pan troglodytes], gi|114647054|ref|XP_001150611.1| PREDICTED: similar to DNA-binding p…	gi|109089644,gi|109090725,gi|1490384,gi|162287391,gi|16753227,gi|18490263,gi|21410970,gi|36138,gi|38511552,gi|38571759,gi|546831,gi|62651201,gi|695638,gi|73994631,gi|82880886,gi|82999317,gi|84662736,gi|9488975,gi|9802306	32653	0.996	3	0.0938	YYPTEDVPR	0.603	0
300mM no BAF	RNA helicase II/Gu protein [Homo sapiens].	gi|11890755,gi|1230564,gi|50659095,gi|51476855	89234.4	0.998	2	0.0262	APQVLVLAPTR	0.95	0
300mM no BAF	RNA helicase II/Gu protein [Homo sapiens].	gi|11890755,gi|1230564,gi|50659095,gi|51476855	89234.4	0.998	2	0.0262	EQLGEEIDSK	0.95	0
300mM no BAF	PREDICTED: vimentin [Macaca mulatta].	gi|109088355,gi|16552261,gi|21757045,gi|340219,gi|62414289,gi|62896523,gi|75075845	52421.2	1	3	0.0815	ISLPLPNFSSLNLR	0.95	0
300mM no BAF	PREDICTED: vimentin [Macaca mulatta].	gi|109088355,gi|16552261,gi|21757045,gi|340219,gi|62414289,gi|62896523,gi|75075845	52421.2	1	3	0.0815	QDVDNASLAR	0.95	0
300mM no BAF	PREDICTED: vimentin [Macaca mulatta].	gi|109088355,gi|16552261,gi|21757045,gi|340219,gi|62414289,gi|62896523,gi|75075845	52421.2	1	3	0.0815	QVQSLTCEVDALK	0.863	0
300mM no BAF	PREDICTED: keratin 5 isoform 15 [Macaca mulatta]	gi|109096789,gi|109096793,gi|109096795,gi|109096797,gi|18999435	62361.6	0.998	3	0.0441	AQYEEIANR	0.905	0
300mM no BAF	PREDICTED: keratin 5 isoform 15 [Macaca mulatta]	gi|109096789,gi|109096793,gi|109096795,gi|109096797,gi|18999435	62361.6	0.998	3	0.0441	FASFIDK	0.818	gi|109096781,gi|81891716,gi|47132620,gi|547754,gi|293686
300mM no BAF	PREDICTED: keratin 5 isoform 15 [Macaca mulatta]	gi|109096789,gi|109096793,gi|109096795,gi|109096797,gi|18999435	62361.6	0.998	3	0.0441	YEELQQTAGR	0.886	0
300mM no BAF	H2A histone family, member Y isoform 1 [Homo sapiens].	gi|20336746,gi|32492946,gi|3493529,gi|4758496,gi|63100748,gi|73971330,gi|93141018	39472.7	1	6	0.205	AASADSTTEGTPADGFTVLSTK	0.95	0
300mM no BAF	H2A histone family, member Y isoform 1 [Homo sapiens].	gi|20336746,gi|32492946,gi|3493529,gi|4758496,gi|63100748,gi|73971330,gi|93141018	39472.7	1	6	0.205	AGVIFPVGR	0.844	0
300mM no BAF	H2A histone family, member Y isoform 1 [Homo sapiens].	gi|20336746,gi|32492946,gi|3493529,gi|4758496,gi|63100748,gi|73971330,gi|93141018	39472.7	1	6	0.205	FVIHCNSPVWGADK	0.95	0
300mM no BAF	H2A histone family, member Y isoform 1 [Homo sapiens].	gi|20336746,gi|32492946,gi|3493529,gi|4758496,gi|63100748,gi|73971330,gi|93141018	39472.7	1	6	0.205	LEAIITPPPAK	0.828	0
300mM no BAF	H2A histone family, member Y isoform 1 [Homo sapiens].	gi|20336746,gi|32492946,gi|3493529,gi|4758496,gi|63100748,gi|73971330,gi|93141018	39472.7	1	6	0.205	QTAAQLILK	0.95	0
300mM no BAF	H2A histone family, member Y isoform 1 [Homo sapiens].	gi|20336746,gi|32492946,gi|3493529,gi|4758496,gi|63100748,gi|73971330,gi|93141018	39472.7	1	6	0.205	SIAFPSIGSGR	0.9	0
300mM no BAF	PREDICTED: similar to 60S ribosomal protein L21 [Macaca mulatta].	gi|109011333,gi|109012589,gi|109018428,gi|109075759,gi|109083732,gi|109096201,gi|109100167,gi|109120253,gi|109120255,gi|109121520,gi|109131486,gi|18104948,gi|55635287,gi|55638519,gi|57088143,gi|57099039,gi|619788,gi|62087780,gi|71153111,gi|73969990,gi|73970962,gi|73970964,gi|73971678,gi|73993374,gi|73996973,gi|74005569,gi|89040203	18632	0.908	1	0.0938	VYNVTQHAVGIVVNK	0.95	0
300mM no BAF	PREDICTED: similar to nuclease sensitive element binding protein 1	gi|109003367,gi|109475401,gi|109490740,gi|181486,gi|199821,gi|203398,gi|203999,gi|2745892,gi|27807361,gi|29437175,gi|38142418,gi|55451,gi|73909033,gi|73950968,gi|73950974,gi|74007889,gi|92373398,gi|9653686,gi|988283	35711.5	0.977	2	0.0932	EDVFVHQTAIK	0.542	0
300mM no BAF	PREDICTED: similar to nuclease sensitive element binding protein 1	gi|109003367,gi|109475401,gi|109490740,gi|181486,gi|199821,gi|203398,gi|203999,gi|2745892,gi|27807361,gi|29437175,gi|38142418,gi|55451,gi|73909033,gi|73950968,gi|73950974,gi|74007889,gi|92373398,gi|9653686,gi|988283	35711.5	0.977	2	0.0932	GAEAANVTGPGGVPVQGSK	0.95	0
300mM no BAF	PREDICTED: similar to Actin, cytoplasmic 2 (Gamma-actin) [Rattus	gi|109492380,gi|1351867,gi|14250401,gi|15277503,gi|16924319,gi|197099682,gi|2318133,gi|28336,gi|4501885,gi|4501887,gi|45269029,gi|47116231,gi|60389477,gi|62897409,gi|62897625,gi|62897671,gi|66735458,gi|67971314,gi|73958059,gi|73958065,gi|73958067,gi|73964667,gi|74151948,gi|74187644,gi|74190672,gi|74191399,gi|74191564,gi|74191566,gi|74213524,gi|809561	41719.8	1	5	0.168	AGFAGDDAPR	0.95	gi|74178273
300mM no BAF	PREDICTED: similar to Actin, cytoplasmic 2 (Gamma-actin) [Rattus	gi|109492380,gi|1351867,gi|14250401,gi|15277503,gi|16924319,gi|197099682,gi|2318133,gi|28336,gi|4501885,gi|4501887,gi|45269029,gi|47116231,gi|60389477,gi|62897409,gi|62897625,gi|62897671,gi|66735458,gi|67971314,gi|73958059,gi|73958065,gi|73958067,gi|73964667,gi|74151948,gi|74187644,gi|74190672,gi|74191399,gi|74191564,gi|74191566,gi|74213524,gi|809561	41719.8	1	5	0.168	AVFPSIVGRPR	0.5	gi|74178273
300mM no BAF	PREDICTED: similar to Actin, cytoplasmic 2 (Gamma-actin) [Rattus	gi|109492380,gi|1351867,gi|14250401,gi|15277503,gi|16924319,gi|197099682,gi|2318133,gi|28336,gi|4501885,gi|4501887,gi|45269029,gi|47116231,gi|60389477,gi|62897409,gi|62897625,gi|62897671,gi|66735458,gi|67971314,gi|73958059,gi|73958065,gi|73958067,gi|73964667,gi|74151948,gi|74187644,gi|74190672,gi|74191399,gi|74191564,gi|74191566,gi|74213524,gi|809561	41719.8	1	5	0.168	EITALAPSTMK	0.95	gi|2724046
300mM no BAF	PREDICTED: similar to Actin, cytoplasmic 2 (Gamma-actin) [Rattus	gi|109492380,gi|1351867,gi|14250401,gi|15277503,gi|16924319,gi|197099682,gi|2318133,gi|28336,gi|4501885,gi|4501887,gi|45269029,gi|47116231,gi|60389477,gi|62897409,gi|62897625,gi|62897671,gi|66735458,gi|67971314,gi|73958059,gi|73958065,gi|73958067,gi|73964667,gi|74151948,gi|74187644,gi|74190672,gi|74191399,gi|74191564,gi|74191566,gi|74213524,gi|809561	41719.8	1	5	0.168	QEYDESGPSIVHR	0.95	gi|74178273,gi|2724046
300mM no BAF	PREDICTED: similar to Actin, cytoplasmic 2 (Gamma-actin) [Rattus	gi|109492380,gi|1351867,gi|14250401,gi|15277503,gi|16924319,gi|197099682,gi|2318133,gi|28336,gi|4501885,gi|4501887,gi|45269029,gi|47116231,gi|60389477,gi|62897409,gi|62897625,gi|62897671,gi|66735458,gi|67971314,gi|73958059,gi|73958065,gi|73958067,gi|73964667,gi|74151948,gi|74187644,gi|74190672,gi|74191399,gi|74191564,gi|74191566,gi|74213524,gi|809561	41719.8	1	5	0.168	VAPEEHPVLLTEAPLNPK	0.95	gi|2724046
300mM no BAF	Ribosomal protein L8 [Homo sapiens].	gi|15082586,gi|4506663,gi|62642484,gi|74212223,gi|74226881	28006.8	0.979	3	0.0856	AVDFAER	0.63	0
300mM no BAF	Ribosomal protein L8 [Homo sapiens].	gi|15082586,gi|4506663,gi|62642484,gi|74212223,gi|74226881	28006.8	0.979	3	0.0856	DIIHDPGR	0.52	0
300mM no BAF	Ribosomal protein L8 [Homo sapiens].	gi|15082586,gi|4506663,gi|62642484,gi|74212223,gi|74226881	28006.8	0.979	3	0.0856	VGLIAAR	0.879	0
300mM no BAF	PREDICTED: similar to Chromobox protein homolog 5 (Heterochromatin	gi|109096963,gi|62721107,gi|6912292,gi|886063	31522	0.908	1	0.0389	SNFSNSADDIK	0.95	0
300mM no BAF	PREDICTED: DnaJ (Hsp40) homolog, subfamily A, member 1 isoform 1 [Macaca mulatta]	gi|109111256,gi|109111258,gi|145559468,gi|197102236,gi|219588,gi|28200377,gi|4504511,gi|62751429,gi|73971109,gi|73979908,gi|75054437	44850.6	0.981	2	0.0655	QISQAYEVLSDAK	0.95	0
300mM no BAF	PREDICTED: DnaJ (Hsp40) homolog, subfamily A, member 1 isoform 1 [Macaca mulatta]	gi|109111256,gi|109111258,gi|145559468,gi|197102236,gi|219588,gi|28200377,gi|4504511,gi|62751429,gi|73971109,gi|73979908,gi|75054437	44850.6	0.981	2	0.0655	TIVITSHPGQIVK	0.628	0
300mM no BAF	Keratin 14 (epidermolysis bullosa simplex, Dowling-Meara, Koebner) [Homo sapiens]	gi|12803709,gi|15431310,gi|386848	0	0.989	2	0	CEMEQQNQEYK	0.874	gi|21754583,gi|4557701
300mM no BAF	Keratin 14 (epidermolysis bullosa simplex, Dowling-Meara, Koebner) [Homo sapiens]	gi|12803709,gi|15431310,gi|386848	0	0.989	2	0	LASYLDK	0.858	gi|55956899,gi|81175178,gi|24430192,gi|1195531,gi|28317,gi|21961605,gi|21754583,gi|4557701
300mM no BAF	Keratin 14 (epidermolysis bullosa simplex, Dowling-Meara, Koebner) [Homo sapiens]	gi|12803709,gi|15431310,gi|386848	0	0.989	2	0	LEQEIATYR	0.91	gi|24430192,gi|1195531,gi|21754583,gi|4557701
300mM no BAF	PREDICTED: similar to nucleolin [Macaca mulatta].	gi|109101818,gi|189306,gi|197098386,gi|21750187,gi|34534595,gi|55956788,gi|75075722	76597.9	1	6	0.103	EAMEDGEIDGNK	0.95	0
300mM no BAF	PREDICTED: similar to nucleolin [Macaca mulatta].	gi|109101818,gi|189306,gi|197098386,gi|21750187,gi|34534595,gi|55956788,gi|75075722	76597.9	1	6	0.103	ESFDGSVR	0.735	0
300mM no BAF	PREDICTED: similar to nucleolin [Macaca mulatta].	gi|109101818,gi|189306,gi|197098386,gi|21750187,gi|34534595,gi|55956788,gi|75075722	76597.9	1	6	0.103	GLSEDTTEETLK	0.95	0
300mM no BAF	PREDICTED: similar to nucleolin [Macaca mulatta].	gi|109101818,gi|189306,gi|197098386,gi|21750187,gi|34534595,gi|55956788,gi|75075722	76597.9	1	6	0.103	NDLAVVDVR	0.95	0
300mM no BAF	PREDICTED: similar to nucleolin [Macaca mulatta].	gi|109101818,gi|189306,gi|197098386,gi|21750187,gi|34534595,gi|55956788,gi|75075722	76597.9	1	6	0.103	SISLYYTGEK	0.947	0
300mM no BAF	PREDICTED: similar to nucleolin [Macaca mulatta].	gi|109101818,gi|189306,gi|197098386,gi|21750187,gi|34534595,gi|55956788,gi|75075722	76597.9	1	6	0.103	TLVLSNLSYSATEETLQEVFEK	0.95	0
300mM no BAF	DEAH (Asp-Glu-Ala-His) box polypeptide 9 [Homo sapiens], gi|116241330|sp|Q08211|DHX9_HUMAN ATP-dependent RNA helicase A (Nuclear DNA helicase II) (NDH II) (DEAH box protein 9), gi|55662450|emb|CAH71701.1| DEAH (Asp-Glu-Ala-His) box polypeptide 9 [Homo sapiens], gi|56206329|emb|CAI19277.1| DEAH (Asp-Glu-Ala-His) box polypeptide 9 [Homo sapiens], gi|119611544|gb|EAW91138.1| DEAH (Asp-Glu-Ala-His) b…	gi|100913206,gi|109019116,gi|1806048,gi|71153339,gi|71153505,gi|73960433,gi|73960435,gi|73960441,gi|73960443,gi|74202542	141248	0.999	3	0.0243	AAECNIVVTQPR	0.95	0
300mM no BAF	DEAH (Asp-Glu-Ala-His) box polypeptide 9 [Homo sapiens], gi|116241330|sp|Q08211|DHX9_HUMAN ATP-dependent RNA helicase A (Nuclear DNA helicase II) (NDH II) (DEAH box protein 9), gi|55662450|emb|CAH71701.1| DEAH (Asp-Glu-Ala-His) box polypeptide 9 [Homo sapiens], gi|56206329|emb|CAI19277.1| DEAH (Asp-Glu-Ala-His) box polypeptide 9 [Homo sapiens], gi|119611544|gb|EAW91138.1| DEAH (Asp-Glu-Ala-His) b…	gi|100913206,gi|109019116,gi|1806048,gi|71153339,gi|71153505,gi|73960433,gi|73960435,gi|73960441,gi|73960443,gi|74202542	141248	0.999	3	0.0243	LAAQSCALSLVR	0.95	0
300mM no BAF	DEAH (Asp-Glu-Ala-His) box polypeptide 9 [Homo sapiens], gi|116241330|sp|Q08211|DHX9_HUMAN ATP-dependent RNA helicase A (Nuclear DNA helicase II) (NDH II) (DEAH box protein 9), gi|55662450|emb|CAH71701.1| DEAH (Asp-Glu-Ala-His) box polypeptide 9 [Homo sapiens], gi|56206329|emb|CAI19277.1| DEAH (Asp-Glu-Ala-His) box polypeptide 9 [Homo sapiens], gi|119611544|gb|EAW91138.1| DEAH (Asp-Glu-Ala-His) b…	gi|100913206,gi|109019116,gi|1806048,gi|71153339,gi|71153505,gi|73960433,gi|73960435,gi|73960441,gi|73960443,gi|74202542	141248	0.999	3	0.0243	LNQYFQK	0.73	0
300mM no BAF	PREDICTED: similar to germinal histone H4 gene [Rattus norvegicus].	gi|109504921,gi|12847763,gi|27573730,gi|4504301,gi|57098917,gi|57106967,gi|74004178,gi|74004206,gi|74004215,gi|74004228,gi|74004246,gi|74004256,gi|76631717,gi|94378251	11349.7	1	6	0.583	DAVTYTEHAK	0.95	gi|223582
300mM no BAF	PREDICTED: similar to germinal histone H4 gene [Rattus norvegicus].	gi|109504921,gi|12847763,gi|27573730,gi|4504301,gi|57098917,gi|57106967,gi|74004178,gi|74004206,gi|74004215,gi|74004228,gi|74004246,gi|74004256,gi|76631717,gi|94378251	11349.7	1	6	0.583	DNIQGITKPAIR	0.95	0
300mM no BAF	PREDICTED: similar to germinal histone H4 gene [Rattus norvegicus].	gi|109504921,gi|12847763,gi|27573730,gi|4504301,gi|57098917,gi|57106967,gi|74004178,gi|74004206,gi|74004215,gi|74004228,gi|74004246,gi|74004256,gi|76631717,gi|94378251	11349.7	1	6	0.583	ISGLIYEETR	0.95	gi|223582
300mM no BAF	PREDICTED: similar to germinal histone H4 gene [Rattus norvegicus].	gi|109504921,gi|12847763,gi|27573730,gi|4504301,gi|57098917,gi|57106967,gi|74004178,gi|74004206,gi|74004215,gi|74004228,gi|74004246,gi|74004256,gi|76631717,gi|94378251	11349.7	1	6	0.583	KTVTAMDVVYALK	0.95	gi|223582
300mM no BAF	PREDICTED: similar to germinal histone H4 gene [Rattus norvegicus].	gi|109504921,gi|12847763,gi|27573730,gi|4504301,gi|57098917,gi|57106967,gi|74004178,gi|74004206,gi|74004215,gi|74004228,gi|74004246,gi|74004256,gi|76631717,gi|94378251	11349.7	1	6	0.583	TLYGFGG	0.854	gi|223582
300mM no BAF	PREDICTED: similar to germinal histone H4 gene [Rattus norvegicus].	gi|109504921,gi|12847763,gi|27573730,gi|4504301,gi|57098917,gi|57106967,gi|74004178,gi|74004206,gi|74004215,gi|74004228,gi|74004246,gi|74004256,gi|76631717,gi|94378251	11349.7	1	6	0.583	VFLENVIR	0.95	gi|223582
300mM no BAF	60S ribosomal protein L5	gi|108862056,gi|109129753,gi|109140950,gi|109511857,gi|126352706,gi|13592051,gi|14591909,gi|1658578,gi|187609312,gi|206734,gi|23956082,gi|61552973,gi|62087540,gi|62896767,gi|73959552,gi|73959554,gi|74184922,gi|74212194,gi|74214659,gi|75076080,gi|78369655,gi|81097641,gi|89038814,gi|94362762	34383.4	0.908	1	0.0471	GAVDGGLSIPHSTK	0.95	0
300mM no BAF	Chain A, Trypsin In Complex With Borate.	gi|110590762,gi|136429,gi|2914482	0	1	6	0	APVLSDSSCK	0.658	0
300mM no BAF	Chain A, Trypsin In Complex With Borate.	gi|110590762,gi|136429,gi|2914482	0	1	6	0	IITHPNFNGNTLDNDIMLIK	0.95	0
300mM no BAF	Chain A, Trypsin In Complex With Borate.	gi|110590762,gi|136429,gi|2914482	0	1	6	0	LGEHNIDVLEGNEQFINAAK	0.95	0
300mM no BAF	Chain A, Trypsin In Complex With Borate.	gi|110590762,gi|136429,gi|2914482	0	1	6	0	LSSPATLNSR	0.95	0
300mM no BAF	Chain A, Trypsin In Complex With Borate.	gi|110590762,gi|136429,gi|2914482	0	1	6	0	SCAAAGTECLISGWGNTK	0.95	0
300mM no BAF	Chain A, Trypsin In Complex With Borate.	gi|110590762,gi|136429,gi|2914482	0	1	6	0	VATVSLPR	0.95	0
300mM no BAF	tubulin beta-3 [Bubalus bubalis]	gi|108744053,gi|109069453,gi|109069461,gi|109069463,gi|109139548,gi|12804891,gi|12846758,gi|13097483,gi|13542680,gi|135490,gi|14124960,gi|16198437,gi|18088719,gi|202231,gi|20809886,gi|2119276,gi|21746161,gi|223486,gi|224839,gi|23958133,gi|26356799,gi|2661079,gi|2665736,gi|27227551,gi|27368062,gi|29126892,gi|338695,gi|3745822,gi|38014544,gi|38511503,gi|40018568,gi|4507729,gi|4884102,gi|49456871,gi…	48861.6	0.908	1	0.0275	EVDEQMLNVQNK	0.95	0
300mM no BAF	PREDICTED: similar to H2A histone family, member V isoform 1	gi|109066680,gi|109500010,gi|4504255,gi|56238118,gi|62087582,gi|6912616,gi|74195793	32756.3	1	4	0.127	AGLQFPVGR	0.95	gi|224567,gi|10800130,gi|109070062,gi|57110393,gi|4504239,gi|109157563,gi|12025520,gi|57110495,gi|57110409,gi|30061327,gi|29244126,gi|74004170,gi|30061371,gi|18105045,gi|57096146,gi|74004189,gi|29553970,gi|57106965,gi|109095827,gi|4504245,gi|817939,gi|24638446,gi|10800144,gi|51304,gi|81884124,gi|28316756,gi|57110427,gi|157821615,gi|4504251,gi|10645195,gi|66730355,gi|73981533,gi|74003986,gi|300613…
300mM no BAF	PREDICTED: similar to H2A histone family, member V isoform 1	gi|109066680,gi|109500010,gi|4504255,gi|56238118,gi|62087582,gi|6912616,gi|74195793	32756.3	1	4	0.127	ATIAGGGVIPHIHK	0.789	gi|74207672
300mM no BAF	PREDICTED: similar to H2A histone family, member V isoform 1	gi|109066680,gi|109500010,gi|4504255,gi|56238118,gi|62087582,gi|6912616,gi|74195793	32756.3	1	4	0.127	GDEELDSLIK	0.95	gi|74207672
300mM no BAF	PREDICTED: similar to H2A histone family, member V isoform 1	gi|109066680,gi|109500010,gi|4504255,gi|56238118,gi|62087582,gi|6912616,gi|74195793	32756.3	1	4	0.127	HLQLAIR	0.842	gi|224567,gi|10800130,gi|109070062,gi|57110393,gi|4504239,gi|109157563,gi|12025520,gi|57110495,gi|57110409,gi|30061327,gi|29244126,gi|74004170,gi|30061371,gi|18105045,gi|57096146,gi|74004189,gi|29553970,gi|57106965,gi|109095827,gi|4504245,gi|817939,gi|24638446,gi|10800144,gi|51304,gi|81884124,gi|28316756,gi|57110427,gi|157821615,gi|4504251,gi|10645195,gi|66730355,gi|73981533,gi|74003986,gi|300613…
300mM no BAF	PREDICTED: similar to ribosomal protein S13 isoform 1 [Macaca	gi|109108269,gi|109110588,gi|109120657,gi|109132315,gi|109139180,gi|109476367,gi|15029927,gi|4506685,gi|54039304,gi|54039369,gi|57089981,gi|82918395,gi|94390143	17205.3	0.987	2	0.146	GLSQSALPYR	0.95	0
300mM no BAF	PREDICTED: similar to ribosomal protein S13 isoform 1 [Macaca	gi|109108269,gi|109110588,gi|109120657,gi|109132315,gi|109139180,gi|109476367,gi|15029927,gi|4506685,gi|54039304,gi|54039369,gi|57089981,gi|82918395,gi|94390143	17205.3	0.987	2	0.146	GLTPSQIGVILR	0.747	0
300mM no BAF	PREDICTED: similar to 60S ribosomal protein L12 isoform 1 [Macaca	gi|109065531,gi|109112216,gi|109125881,gi|157822227,gi|160333553,gi|26353478,gi|4506597,gi|45268981,gi|62088522,gi|73968009,gi|74198639,gi|94390243	17787	1	3	0.248	EILGTAQSVGCNVDGR	0.95	0
300mM no BAF	PREDICTED: similar to 60S ribosomal protein L12 isoform 1 [Macaca	gi|109065531,gi|109112216,gi|109125881,gi|157822227,gi|160333553,gi|26353478,gi|4506597,gi|45268981,gi|62088522,gi|73968009,gi|74198639,gi|94390243	17787	1	3	0.248	IGPLGLSPK	0.95	0
300mM no BAF	PREDICTED: similar to 60S ribosomal protein L12 isoform 1 [Macaca	gi|109065531,gi|109112216,gi|109125881,gi|157822227,gi|160333553,gi|26353478,gi|4506597,gi|45268981,gi|62088522,gi|73968009,gi|74198639,gi|94390243	17787	1	3	0.248	QAQIEVVPSASALIIK	0.873	0
300mM no BAF	chromatin-specific transcription elongation factor large subunit [Homo sapiens], gi|114651875|ref|XP_528703.2| PREDICTED: similar to chromatin-specific transcription elongation factor FACT 140 kDa subunit isoform 2 [Pan troglodytes], gi|74753511|sp|Q9Y5B9|SPT16_HUMAN FACT complex subunit SPT16 (Facilitates chromatin transcription complex subunit SPT16) (hSPT16) (FACT 140 kDa subunit) (FACTp140) (…	gi|6005757,gi|73977348,gi|73977350,gi|76627095	119899	0.999	3	0.0306	AASITSEVFNK	0.701	0
300mM no BAF	chromatin-specific transcription elongation factor large subunit [Homo sapiens], gi|114651875|ref|XP_528703.2| PREDICTED: similar to chromatin-specific transcription elongation factor FACT 140 kDa subunit isoform 2 [Pan troglodytes], gi|74753511|sp|Q9Y5B9|SPT16_HUMAN FACT complex subunit SPT16 (Facilitates chromatin transcription complex subunit SPT16) (hSPT16) (FACT 140 kDa subunit) (FACTp140) (…	gi|6005757,gi|73977348,gi|73977350,gi|76627095	119899	0.999	3	0.0306	DLGFNGAPYR	0.95	0
300mM no BAF	chromatin-specific transcription elongation factor large subunit [Homo sapiens], gi|114651875|ref|XP_528703.2| PREDICTED: similar to chromatin-specific transcription elongation factor FACT 140 kDa subunit isoform 2 [Pan troglodytes], gi|74753511|sp|Q9Y5B9|SPT16_HUMAN FACT complex subunit SPT16 (Facilitates chromatin transcription complex subunit SPT16) (hSPT16) (FACT 140 kDa subunit) (FACTp140) (…	gi|6005757,gi|73977348,gi|73977350,gi|76627095	119899	0.999	3	0.0306	ELAAQLNEEAK	0.95	0
300mM no BAF	splicing factor, arginine/serine-rich 9 [Homo sapiens], gi|114647286|ref|XP_001160785.1| PREDICTED: splicing factor, arginine/serine-rich 9 isoform 2 [Pan troglodytes], gi|3929377|sp|Q13242|SFRS9_HUMAN Splicing factor, arginine/serine-rich 9 (Pre-mRNA-splicing factor SRp30C), gi|1049078|gb|AAA93069.1| SRp30c, gi|2826894|emb|CAA16498.1| splicing factor, arginine/serine-rich 9 [Homo sapiens], gi|40…	gi|4506903,gi|57105666,gi|57164147,gi|73994724,gi|73994728	25524.9	1	3	0.145	DAEDAIYGR	0.95	0
300mM no BAF	splicing factor, arginine/serine-rich 9 [Homo sapiens], gi|114647286|ref|XP_001160785.1| PREDICTED: splicing factor, arginine/serine-rich 9 isoform 2 [Pan troglodytes], gi|3929377|sp|Q13242|SFRS9_HUMAN Splicing factor, arginine/serine-rich 9 (Pre-mRNA-splicing factor SRp30C), gi|1049078|gb|AAA93069.1| SRp30c, gi|2826894|emb|CAA16498.1| splicing factor, arginine/serine-rich 9 [Homo sapiens], gi|40…	gi|4506903,gi|57105666,gi|57164147,gi|73994724,gi|73994728	25524.9	1	3	0.145	EAGDVCYADVQK	0.95	0
300mM no BAF	splicing factor, arginine/serine-rich 9 [Homo sapiens], gi|114647286|ref|XP_001160785.1| PREDICTED: splicing factor, arginine/serine-rich 9 isoform 2 [Pan troglodytes], gi|3929377|sp|Q13242|SFRS9_HUMAN Splicing factor, arginine/serine-rich 9 (Pre-mRNA-splicing factor SRp30C), gi|1049078|gb|AAA93069.1| SRp30c, gi|2826894|emb|CAA16498.1| splicing factor, arginine/serine-rich 9 [Homo sapiens], gi|40…	gi|4506903,gi|57105666,gi|57164147,gi|73994724,gi|73994728	25524.9	1	3	0.145	IYVGNLPTDVR	0.95	0
300mM no BAF	PREDICTED: similar to 60S acidic ribosomal protein P1 [Macaca	gi|109091571,gi|109124534,gi|109475161,gi|31979223,gi|37725082,gi|4506669,gi|47496625,gi|49457412,gi|56090277	11480.1	0.908	1	0.14	AAGVNVEPFWPGLFAK	0.95	0
300mM no BAF	PREDICTED: similar to 60S ribosomal protein L22 (Heparin-binding	gi|108996179,gi|108996186,gi|108996189,gi|108996192,gi|109075836,gi|109080647,gi|13592059,gi|33150766,gi|4506613,gi|627739,gi|6677775,gi|73950656,gi|73956651	14395	0.908	1	0.104	AGNLGGGVVTIER	0.95	0
300mM no BAF	PREDICTED: similar to Nucleolar phosphoprotein p130 (Nucleolar 130	gi|109090387,gi|109090389,gi|109090391,gi|12804871,gi|148596949,gi|197099164,gi|434765,gi|663008	74493.1	0.908	1	0.0141	DNQLSEVANK	0.95	0
300mM no BAF	PREDICTED: heterogeneous nuclear ribonucleoprotein A1 isoform 3	gi|109098438,gi|109131409,gi|112421201,gi|133254,gi|13436308,gi|14043070,gi|149714872,gi|38328245,gi|4504445,gi|73993822,gi|73993824,gi|73996141,gi|74204146,gi|74220381,gi|75517570,gi|8393547,gi|85060507	34194.4	0.908	1	0.0812	DYFEQYGK	0.783	gi|82956957,gi|74004702,gi|38328278,gi|74004704,gi|74004700,gi|109100198,gi|109100196,gi|82957137,gi|82918363,gi|109100194,gi|73959032,gi|34740329,gi|73959030,gi|94400765,gi|82801284,gi|74004682,gi|94371439,gi|74004694,gi|31559916,gi|74004696,gi|51769129,gi|74004706,gi|74004690,gi|74004692,gi|74228812,gi|197098694,gi|82918359,gi|157277969,gi|62027493,gi|55250278
300mM no BAF	PREDICTED: heterogeneous nuclear ribonucleoprotein A1 isoform 3	gi|109098438,gi|109131409,gi|112421201,gi|133254,gi|13436308,gi|14043070,gi|149714872,gi|38328245,gi|4504445,gi|73993822,gi|73993824,gi|73996141,gi|74204146,gi|74220381,gi|75517570,gi|8393547,gi|85060507	34194.4	0.908	1	0.0812	NQGGYGGSSSSSSYGSGR	0.95	0
300mM no BAF	keratin 9 [Homo sapiens].	gi|55956899,gi|81175178	62113	1	3	0.0738	LASYLDK	0.858	gi|24430192,gi|15431310,gi|1195531,gi|386848,gi|28317,gi|21961605,gi|21754583,gi|4557701,gi|12803709
300mM no BAF	keratin 9 [Homo sapiens].	gi|55956899,gi|81175178	62113	1	3	0.0738	SGGGGGGGLGSGGSIR	0.95	0
300mM no BAF	keratin 9 [Homo sapiens].	gi|55956899,gi|81175178	62113	1	3	0.0738	TLLDIDNTR	0.929	0
300mM no BAF	keratin 9 [Homo sapiens].	gi|55956899,gi|81175178	62113	1	3	0.0738	VQALEEANNDLENK	0.95	0
300mM no BAF	nucleophosmin 1 isoform 1 [Homo sapiens], gi|114662863|ref|XP_001151979.1| PREDICTED: similar to nucleophosmin - human isoform 3 [Pan troglodytes], gi|114662865|ref|XP_001152043.1| PREDICTED: similar to nucleophosmin - human isoform 4 [Pan troglodytes], gi|114762|sp|P06748|NPM_HUMAN Nucleophosmin (NPM) (Nucleolar phosphoprotein B23) (Numatrin) (Nucleolar protein NO38), gi|189272|gb|AAA36380.1| nu…	gi|10835063,gi|109079755,gi|16876992,gi|197101984,gi|33694244,gi|40353734,gi|58220469,gi|73949577,gi|73949583,gi|73949585,gi|73953440,gi|73953442,gi|73953454,gi|73953458,gi|825671	32557.4	1	5	0.211	DELHIVEAEAMNYEGSPIK	0.95	0
300mM no BAF	nucleophosmin 1 isoform 1 [Homo sapiens], gi|114662863|ref|XP_001151979.1| PREDICTED: similar to nucleophosmin - human isoform 3 [Pan troglodytes], gi|114662865|ref|XP_001152043.1| PREDICTED: similar to nucleophosmin - human isoform 4 [Pan troglodytes], gi|114762|sp|P06748|NPM_HUMAN Nucleophosmin (NPM) (Nucleolar phosphoprotein B23) (Numatrin) (Nucleolar protein NO38), gi|189272|gb|AAA36380.1| nu…	gi|10835063,gi|109079755,gi|16876992,gi|197101984,gi|33694244,gi|40353734,gi|58220469,gi|73949577,gi|73949583,gi|73949585,gi|73953440,gi|73953442,gi|73953454,gi|73953458,gi|825671	32557.4	1	5	0.211	GPSSVEDIK	0.95	0
300mM no BAF	nucleophosmin 1 isoform 1 [Homo sapiens], gi|114662863|ref|XP_001151979.1| PREDICTED: similar to nucleophosmin - human isoform 3 [Pan troglodytes], gi|114662865|ref|XP_001152043.1| PREDICTED: similar to nucleophosmin - human isoform 4 [Pan troglodytes], gi|114762|sp|P06748|NPM_HUMAN Nucleophosmin (NPM) (Nucleolar phosphoprotein B23) (Numatrin) (Nucleolar protein NO38), gi|189272|gb|AAA36380.1| nu…	gi|10835063,gi|109079755,gi|16876992,gi|197101984,gi|33694244,gi|40353734,gi|58220469,gi|73949577,gi|73949583,gi|73949585,gi|73953440,gi|73953442,gi|73953454,gi|73953458,gi|825671	32557.4	1	5	0.211	LLSISGK	0.796	0
300mM no BAF	nucleophosmin 1 isoform 1 [Homo sapiens], gi|114662863|ref|XP_001151979.1| PREDICTED: similar to nucleophosmin - human isoform 3 [Pan troglodytes], gi|114662865|ref|XP_001152043.1| PREDICTED: similar to nucleophosmin - human isoform 4 [Pan troglodytes], gi|114762|sp|P06748|NPM_HUMAN Nucleophosmin (NPM) (Nucleolar phosphoprotein B23) (Numatrin) (Nucleolar protein NO38), gi|189272|gb|AAA36380.1| nu…	gi|10835063,gi|109079755,gi|16876992,gi|197101984,gi|33694244,gi|40353734,gi|58220469,gi|73949577,gi|73949583,gi|73949585,gi|73953440,gi|73953442,gi|73953454,gi|73953458,gi|825671	32557.4	1	5	0.211	MTDQEAIQDLWQWR	0.568	0
300mM no BAF	nucleophosmin 1 isoform 1 [Homo sapiens], gi|114662863|ref|XP_001151979.1| PREDICTED: similar to nucleophosmin - human isoform 3 [Pan troglodytes], gi|114662865|ref|XP_001152043.1| PREDICTED: similar to nucleophosmin - human isoform 4 [Pan troglodytes], gi|114762|sp|P06748|NPM_HUMAN Nucleophosmin (NPM) (Nucleolar phosphoprotein B23) (Numatrin) (Nucleolar protein NO38), gi|189272|gb|AAA36380.1| nu…	gi|10835063,gi|109079755,gi|16876992,gi|197101984,gi|33694244,gi|40353734,gi|58220469,gi|73949577,gi|73949583,gi|73949585,gi|73953440,gi|73953442,gi|73953454,gi|73953458,gi|825671	32557.4	1	5	0.211	VDNDENEHQLSLR	0.95	0
300mM no BAF	PREDICTED: similar to 60S ribosomal protein L7a [Rattus	gi|62666132	29776.2	0.908	1	0.0714	RPPVLLAGVNTVTTLVENK	0.95	0
300mM no BAF	keratin 2 [Homo sapiens].	gi|47132620,gi|547754	65848.4	1	4	0.0915	AQYEEIAQR	0.95	gi|109096781
300mM no BAF	keratin 2 [Homo sapiens].	gi|47132620,gi|547754	65848.4	1	4	0.0915	DYQELMNVK	0.792	0
300mM no BAF	keratin 2 [Homo sapiens].	gi|47132620,gi|547754	65848.4	1	4	0.0915	FASFIDK	0.818	gi|109096781,gi|18999435,gi|109096797,gi|81891716,gi|109096795,gi|109096789,gi|109096793,gi|293686
300mM no BAF	keratin 2 [Homo sapiens].	gi|47132620,gi|547754	65848.4	1	4	0.0915	GFSSGSAVVSGGSR	0.95	0
300mM no BAF	keratin 2 [Homo sapiens].	gi|47132620,gi|547754	65848.4	1	4	0.0915	IEISELNR	0.95	gi|11935049,gi|109096823,gi|109096825,gi|109096827,gi|109096829
300mM no BAF	keratin 2 [Homo sapiens].	gi|47132620,gi|547754	65848.4	1	4	0.0915	NVQDAIADAEQR	0.95	0
300mM no BAF	ribosomal protein L13 [Homo sapiens], gi|15431297|ref|NP_000968.2| ribosomal protein L13 [Homo sapiens], gi|21903462|sp|P26373|RL13_HUMAN 60S ribosomal protein L13 (Breast basic conserved protein 1), gi|13436332|gb|AAH04954.1| RPL13 protein [Homo sapiens], gi|13938412|gb|AAH07345.1| Ribosomal protein L13 [Homo sapiens], gi|14043151|gb|AAH07563.1| Ribosomal protein L13 [Homo sapiens], gi|14043668|…	gi|15431295,gi|42490910	24244.2	0.999	3	0.156	LATQLTGPVMPVR	0.932	0
300mM no BAF	ribosomal protein L13 [Homo sapiens], gi|15431297|ref|NP_000968.2| ribosomal protein L13 [Homo sapiens], gi|21903462|sp|P26373|RL13_HUMAN 60S ribosomal protein L13 (Breast basic conserved protein 1), gi|13436332|gb|AAH04954.1| RPL13 protein [Homo sapiens], gi|13938412|gb|AAH07345.1| Ribosomal protein L13 [Homo sapiens], gi|14043151|gb|AAH07563.1| Ribosomal protein L13 [Homo sapiens], gi|14043668|…	gi|15431295,gi|42490910	24244.2	0.999	3	0.156	STESLQANVQR	0.95	0
300mM no BAF	ribosomal protein L13 [Homo sapiens], gi|15431297|ref|NP_000968.2| ribosomal protein L13 [Homo sapiens], gi|21903462|sp|P26373|RL13_HUMAN 60S ribosomal protein L13 (Breast basic conserved protein 1), gi|13436332|gb|AAH04954.1| RPL13 protein [Homo sapiens], gi|13938412|gb|AAH07345.1| Ribosomal protein L13 [Homo sapiens], gi|14043151|gb|AAH07563.1| Ribosomal protein L13 [Homo sapiens], gi|14043668|…	gi|15431295,gi|42490910	24244.2	0.999	3	0.156	TIGISVDPR	0.808	0
300mM no BAF	ribosomal protein L18 [Rattus norvegicus].	gi|13592057,gi|3122678,gi|4506607,gi|57036383,gi|62752012,gi|74006513,gi|89573859,gi|89573861,gi|89573863,gi|89573867,gi|89573879,gi|89573881,gi|89573883,gi|89573885,gi|89573887,gi|89573889,gi|89573891,gi|89573893,gi|89573899,gi|89573901	12208.7	0.992	2	0.231	TAVVVGTITDDVR	0.845	0
300mM no BAF	ribosomal protein L18 [Rattus norvegicus].	gi|13592057,gi|3122678,gi|4506607,gi|57036383,gi|62752012,gi|74006513,gi|89573859,gi|89573861,gi|89573863,gi|89573867,gi|89573879,gi|89573881,gi|89573883,gi|89573885,gi|89573887,gi|89573889,gi|89573891,gi|89573893,gi|89573899,gi|89573901	12208.7	0.992	2	0.231	TNSTFNQVVLK	0.95	0
300mM no BAF	Brain abundant, membrane attached signal protein 1 [Homo sapiens].	gi|12653493,gi|30795231	22603.3	0.994	2	0.229	AEPPKAPEQEQAAPGPAAGGEAPK	0.95	0
300mM no BAF	Brain abundant, membrane attached signal protein 1 [Homo sapiens].	gi|12653493,gi|30795231	22603.3	0.994	2	0.229	AQGPAASAEEPKPVEAPAANSDQTVTVK	0.885	0
300mM no BAF	casein alphaS1.	gi|225632,gi|30794348,gi|70905149,gi|75038951	24511.4	0.908	1	0.0561	FFVAPFPEVFGK	0.95	0
300mM with BAF	PREDICTED: similar to RecQ protein-like isoform 1 [Macaca mulatta]	gi|109095922,gi|110625690,gi|14591902,gi|15928520,gi|197100975,gi|29429194,gi|4579746,gi|531243,gi|619863,gi|6831608,gi|74203917,gi|74209854	73440	0.999	3	0.0616	ISSMVVMENVGQQK	0.516	0
300mM with BAF	PREDICTED: similar to RecQ protein-like isoform 1 [Macaca mulatta]	gi|109095922,gi|110625690,gi|14591902,gi|15928520,gi|197100975,gi|29429194,gi|4579746,gi|531243,gi|619863,gi|6831608,gi|74203917,gi|74209854	73440	0.999	3	0.0616	QLGISATMLNASSSK	0.95	0
300mM with BAF	PREDICTED: similar to RecQ protein-like isoform 1 [Macaca mulatta]	gi|109095922,gi|110625690,gi|14591902,gi|15928520,gi|197100975,gi|29429194,gi|4579746,gi|531243,gi|619863,gi|6831608,gi|74203917,gi|74209854	73440	0.999	3	0.0616	SMENYYQESGR	0.95	0
300mM with BAF	pannexin 3 [Homo sapiens], gi|20139071|sp|Q96QZ0|PANX3_HUMAN Pannexin-3, gi|15341532|gb|AAK95655.1|AF406650_1 putative gap junction protein pannexin 3 [Homo sapiens], gi|119587992|gb|EAW67588.1| pannexin 3 [Homo sapiens], gi|157170156|gb|AAI52945.1| Pannexin 3 [synthetic construct] [MASS=44683]	gi|16418453	44668.1	0.897	1	0.0204	QDGPGQDK	0.95	0
300mM with BAF	Keratin 10 [Homo sapiens].	gi|21961605,gi|28317	58810.8	1	5	0.089	ALEESNYELEGK	0.95	0
300mM with BAF	Keratin 10 [Homo sapiens].	gi|21961605,gi|28317	58810.8	1	5	0.089	DAEAWFNEK	0.95	0
300mM with BAF	Keratin 10 [Homo sapiens].	gi|21961605,gi|28317	58810.8	1	5	0.089	GSLGGGFSSGGFSGGSFSR	0.95	0
300mM with BAF	Keratin 10 [Homo sapiens].	gi|21961605,gi|28317	58810.8	1	5	0.089	SQYEQLAEQNR	0.95	0
300mM with BAF	Keratin 10 [Homo sapiens].	gi|21961605,gi|28317	58810.8	1	5	0.089	SQYEQLAEQNRK	0.95	0
300mM with BAF	aprataxin isoform b [Homo sapiens].	gi|28329430,gi|28329433,gi|28329436,gi|31455399,gi|31455403,gi|31455405,gi|31874598,gi|32527938,gi|32527944,gi|32527946,gi|34538291,gi|48428038	39085.6	0.897	1	0.0789	DAAQEAEAGTGLEPGSNSGQCSVPLKK	0.95	0
300mM with BAF	Small nuclear ribonucleoprotein D3 [Mus musculus].	gi|15079335,gi|4759160,gi|6730225,gi|74007795	13898.6	0.897	1	0.0794	VAQLEQVYIR	0.95	0
300mM with BAF	PREDICTED: similar to splicing factor, arginine/serine-rich 1	gi|109114623,gi|118582269,gi|118582271,gi|179074,gi|197099026,gi|5902076,gi|62088696,gi|73966546,gi|73966552,gi|73966554	27727.1	0.981	2	0.0887	DGTGVVEFVR	0.613	0
300mM with BAF	PREDICTED: similar to splicing factor, arginine/serine-rich 1	gi|109114623,gi|118582269,gi|118582271,gi|179074,gi|197099026,gi|5902076,gi|62088696,gi|73966546,gi|73966552,gi|73966554	27727.1	0.981	2	0.0887	EAGDVCYADVYR	0.95	0
300mM with BAF	PREDICTED: similar to histone 1, H2ai (predicted) isoform 1 [Canis	gi|74003971	28977.8	1	4	0.147	AMGIMNSFVNDIFER	0.95	gi|10800140,gi|27693390,gi|46049029,gi|13386452,gi|109017921,gi|55589506,gi|109070012,gi|74004213,gi|4504277,gi|61835422,gi|68532405,gi|61827353,gi|20336754,gi|31979,gi|184086,gi|68226431,gi|28173554,gi|32113,gi|73975428,gi|16306566
300mM with BAF	PREDICTED: similar to histone 1, H2ai (predicted) isoform 1 [Canis	gi|74003971	28977.8	1	4	0.147	EIAQDFK	0.95	gi|109073005
300mM with BAF	PREDICTED: similar to histone 1, H2ai (predicted) isoform 1 [Canis	gi|74003971	28977.8	1	4	0.147	LLLPGELAK	0.95	gi|10800140,gi|27693390,gi|46049029,gi|13386452,gi|109017921,gi|55589506,gi|109070012,gi|74004213,gi|4504277,gi|61835422,gi|68532405,gi|61827353,gi|20336754,gi|31979,gi|184086,gi|68226431,gi|28173554,gi|32113,gi|73975428,gi|16306566,gi|126165296
300mM with BAF	PREDICTED: similar to histone 1, H2ai (predicted) isoform 1 [Canis	gi|74003971	28977.8	1	4	0.147	STELLIR	0.95	gi|109073005
300mM with BAF	PREDICTED: hypothetical protein [Rattus norvegicus].	gi|109508190	43194.6	0.897	1	0.0246	KDSPFEMSR	0.95	0
300mM with BAF	lamin A/C isoform 1 precursor [Homo sapiens], gi|125962|sp|P02545|LMNA_HUMAN Lamin-A/C (70 kDa lamin) (Renal carcinoma antigen NY-REN-32), gi|54035059|gb|AAH14507.1| Lamin A/C [Homo sapiens], gi|55957498|emb|CAI15522.1| lamin A/C [Homo sapiens], gi|190690113|gb|ACE86831.1| lamin A/C protein [synthetic construct], gi|190691485|gb|ACE87517.1| lamin A/C protein [synthetic construct] [MASS=74139]	gi|27436946,gi|57014043	74064.6	1	25	0.438	AAYEAELGDARK	0.938	gi|74220835
300mM with BAF	lamin A/C isoform 1 precursor [Homo sapiens], gi|125962|sp|P02545|LMNA_HUMAN Lamin-A/C (70 kDa lamin) (Renal carcinoma antigen NY-REN-32), gi|54035059|gb|AAH14507.1| Lamin A/C [Homo sapiens], gi|55957498|emb|CAI15522.1| lamin A/C [Homo sapiens], gi|190690113|gb|ACE86831.1| lamin A/C protein [synthetic construct], gi|190691485|gb|ACE87517.1| lamin A/C protein [synthetic construct] [MASS=74139]	gi|27436946,gi|57014043	74064.6	1	25	0.438	AGQVVTIWAAGAGATHSPPTDLVWK	0.695	0
300mM with BAF	lamin A/C isoform 1 precursor [Homo sapiens], gi|125962|sp|P02545|LMNA_HUMAN Lamin-A/C (70 kDa lamin) (Renal carcinoma antigen NY-REN-32), gi|54035059|gb|AAH14507.1| Lamin A/C [Homo sapiens], gi|55957498|emb|CAI15522.1| lamin A/C [Homo sapiens], gi|190690113|gb|ACE86831.1| lamin A/C protein [synthetic construct], gi|190691485|gb|ACE87517.1| lamin A/C protein [synthetic construct] [MASS=74139]	gi|27436946,gi|57014043	74064.6	1	25	0.438	AQNTWGCGNSLR	0.95	0
300mM with BAF	lamin A/C isoform 1 precursor [Homo sapiens], gi|125962|sp|P02545|LMNA_HUMAN Lamin-A/C (70 kDa lamin) (Renal carcinoma antigen NY-REN-32), gi|54035059|gb|AAH14507.1| Lamin A/C [Homo sapiens], gi|55957498|emb|CAI15522.1| lamin A/C [Homo sapiens], gi|190690113|gb|ACE86831.1| lamin A/C protein [synthetic construct], gi|190691485|gb|ACE87517.1| lamin A/C protein [synthetic construct] [MASS=74139]	gi|27436946,gi|57014043	74064.6	1	25	0.438	ASASGSGAQVGGPISSGSSASSVTVTR	0.95	0
300mM with BAF	lamin A/C isoform 1 precursor [Homo sapiens], gi|125962|sp|P02545|LMNA_HUMAN Lamin-A/C (70 kDa lamin) (Renal carcinoma antigen NY-REN-32), gi|54035059|gb|AAH14507.1| Lamin A/C [Homo sapiens], gi|55957498|emb|CAI15522.1| lamin A/C [Homo sapiens], gi|190690113|gb|ACE86831.1| lamin A/C protein [synthetic construct], gi|190691485|gb|ACE87517.1| lamin A/C protein [synthetic construct] [MASS=74139]	gi|27436946,gi|57014043	74064.6	1	25	0.438	EELDFQK	0.918	gi|74220835
300mM with BAF	lamin A/C isoform 1 precursor [Homo sapiens], gi|125962|sp|P02545|LMNA_HUMAN Lamin-A/C (70 kDa lamin) (Renal carcinoma antigen NY-REN-32), gi|54035059|gb|AAH14507.1| Lamin A/C [Homo sapiens], gi|55957498|emb|CAI15522.1| lamin A/C [Homo sapiens], gi|190690113|gb|ACE86831.1| lamin A/C protein [synthetic construct], gi|190691485|gb|ACE87517.1| lamin A/C protein [synthetic construct] [MASS=74139]	gi|27436946,gi|57014043	74064.6	1	25	0.438	ITESEEVVSR	0.863	gi|74220835
300mM with BAF	lamin A/C isoform 1 precursor [Homo sapiens], gi|125962|sp|P02545|LMNA_HUMAN Lamin-A/C (70 kDa lamin) (Renal carcinoma antigen NY-REN-32), gi|54035059|gb|AAH14507.1| Lamin A/C [Homo sapiens], gi|55957498|emb|CAI15522.1| lamin A/C [Homo sapiens], gi|190690113|gb|ACE86831.1| lamin A/C protein [synthetic construct], gi|190691485|gb|ACE87517.1| lamin A/C protein [synthetic construct] [MASS=74139]	gi|27436946,gi|57014043	74064.6	1	25	0.438	KLLEGEEER	0.95	gi|5031877,gi|73987493,gi|74220835,gi|27436951
300mM with BAF	lamin A/C isoform 1 precursor [Homo sapiens], gi|125962|sp|P02545|LMNA_HUMAN Lamin-A/C (70 kDa lamin) (Renal carcinoma antigen NY-REN-32), gi|54035059|gb|AAH14507.1| Lamin A/C [Homo sapiens], gi|55957498|emb|CAI15522.1| lamin A/C [Homo sapiens], gi|190690113|gb|ACE86831.1| lamin A/C protein [synthetic construct], gi|190691485|gb|ACE87517.1| lamin A/C protein [synthetic construct] [MASS=74139]	gi|27436946,gi|57014043	74064.6	1	25	0.438	KQLQDEMLR	0.95	gi|74220835
300mM with BAF	lamin A/C isoform 1 precursor [Homo sapiens], gi|125962|sp|P02545|LMNA_HUMAN Lamin-A/C (70 kDa lamin) (Renal carcinoma antigen NY-REN-32), gi|54035059|gb|AAH14507.1| Lamin A/C [Homo sapiens], gi|55957498|emb|CAI15522.1| lamin A/C [Homo sapiens], gi|190690113|gb|ACE86831.1| lamin A/C protein [synthetic construct], gi|190691485|gb|ACE87517.1| lamin A/C protein [synthetic construct] [MASS=74139]	gi|27436946,gi|57014043	74064.6	1	25	0.438	LEAALGEAK	0.819	gi|74220835
300mM with BAF	lamin A/C isoform 1 precursor [Homo sapiens], gi|125962|sp|P02545|LMNA_HUMAN Lamin-A/C (70 kDa lamin) (Renal carcinoma antigen NY-REN-32), gi|54035059|gb|AAH14507.1| Lamin A/C [Homo sapiens], gi|55957498|emb|CAI15522.1| lamin A/C [Homo sapiens], gi|190690113|gb|ACE86831.1| lamin A/C protein [synthetic construct], gi|190691485|gb|ACE87517.1| lamin A/C protein [synthetic construct] [MASS=74139]	gi|27436946,gi|57014043	74064.6	1	25	0.438	LKDLEALLNSK	0.95	gi|74220835
300mM with BAF	lamin A/C isoform 1 precursor [Homo sapiens], gi|125962|sp|P02545|LMNA_HUMAN Lamin-A/C (70 kDa lamin) (Renal carcinoma antigen NY-REN-32), gi|54035059|gb|AAH14507.1| Lamin A/C [Homo sapiens], gi|55957498|emb|CAI15522.1| lamin A/C [Homo sapiens], gi|190690113|gb|ACE86831.1| lamin A/C protein [synthetic construct], gi|190691485|gb|ACE87517.1| lamin A/C protein [synthetic construct] [MASS=74139]	gi|27436946,gi|57014043	74064.6	1	25	0.438	LQEKEDLQELNDR	0.95	gi|74220835
300mM with BAF	lamin A/C isoform 1 precursor [Homo sapiens], gi|125962|sp|P02545|LMNA_HUMAN Lamin-A/C (70 kDa lamin) (Renal carcinoma antigen NY-REN-32), gi|54035059|gb|AAH14507.1| Lamin A/C [Homo sapiens], gi|55957498|emb|CAI15522.1| lamin A/C [Homo sapiens], gi|190690113|gb|ACE86831.1| lamin A/C protein [synthetic construct], gi|190691485|gb|ACE87517.1| lamin A/C protein [synthetic construct] [MASS=74139]	gi|27436946,gi|57014043	74064.6	1	25	0.438	LQLELSK	0.95	gi|74220835
300mM with BAF	lamin A/C isoform 1 precursor [Homo sapiens], gi|125962|sp|P02545|LMNA_HUMAN Lamin-A/C (70 kDa lamin) (Renal carcinoma antigen NY-REN-32), gi|54035059|gb|AAH14507.1| Lamin A/C [Homo sapiens], gi|55957498|emb|CAI15522.1| lamin A/C [Homo sapiens], gi|190690113|gb|ACE86831.1| lamin A/C protein [synthetic construct], gi|190691485|gb|ACE87517.1| lamin A/C protein [synthetic construct] [MASS=74139]	gi|27436946,gi|57014043	74064.6	1	25	0.438	LQTMKEELDFQK	0.95	0
300mM with BAF	lamin A/C isoform 1 precursor [Homo sapiens], gi|125962|sp|P02545|LMNA_HUMAN Lamin-A/C (70 kDa lamin) (Renal carcinoma antigen NY-REN-32), gi|54035059|gb|AAH14507.1| Lamin A/C [Homo sapiens], gi|55957498|emb|CAI15522.1| lamin A/C [Homo sapiens], gi|190690113|gb|ACE86831.1| lamin A/C protein [synthetic construct], gi|190691485|gb|ACE87517.1| lamin A/C protein [synthetic construct] [MASS=74139]	gi|27436946,gi|57014043	74064.6	1	25	0.438	LRDLEDSLAR	0.95	gi|74220835
300mM with BAF	lamin A/C isoform 1 precursor [Homo sapiens], gi|125962|sp|P02545|LMNA_HUMAN Lamin-A/C (70 kDa lamin) (Renal carcinoma antigen NY-REN-32), gi|54035059|gb|AAH14507.1| Lamin A/C [Homo sapiens], gi|55957498|emb|CAI15522.1| lamin A/C [Homo sapiens], gi|190690113|gb|ACE86831.1| lamin A/C protein [synthetic construct], gi|190691485|gb|ACE87517.1| lamin A/C protein [synthetic construct] [MASS=74139]	gi|27436946,gi|57014043	74064.6	1	25	0.438	LVEIDNGK	0.669	gi|74220835
300mM with BAF	lamin A/C isoform 1 precursor [Homo sapiens], gi|125962|sp|P02545|LMNA_HUMAN Lamin-A/C (70 kDa lamin) (Renal carcinoma antigen NY-REN-32), gi|54035059|gb|AAH14507.1| Lamin A/C [Homo sapiens], gi|55957498|emb|CAI15522.1| lamin A/C [Homo sapiens], gi|190690113|gb|ACE86831.1| lamin A/C protein [synthetic construct], gi|190691485|gb|ACE87517.1| lamin A/C protein [synthetic construct] [MASS=74139]	gi|27436946,gi|57014043	74064.6	1	25	0.438	NIYSEELR	0.95	gi|74220835
300mM with BAF	lamin A/C isoform 1 precursor [Homo sapiens], gi|125962|sp|P02545|LMNA_HUMAN Lamin-A/C (70 kDa lamin) (Renal carcinoma antigen NY-REN-32), gi|54035059|gb|AAH14507.1| Lamin A/C [Homo sapiens], gi|55957498|emb|CAI15522.1| lamin A/C [Homo sapiens], gi|190690113|gb|ACE86831.1| lamin A/C protein [synthetic construct], gi|190691485|gb|ACE87517.1| lamin A/C protein [synthetic construct] [MASS=74139]	gi|27436946,gi|57014043	74064.6	1	25	0.438	NSNLVGAAHEELQQSR	0.95	gi|74220835
300mM with BAF	lamin A/C isoform 1 precursor [Homo sapiens], gi|125962|sp|P02545|LMNA_HUMAN Lamin-A/C (70 kDa lamin) (Renal carcinoma antigen NY-REN-32), gi|54035059|gb|AAH14507.1| Lamin A/C [Homo sapiens], gi|55957498|emb|CAI15522.1| lamin A/C [Homo sapiens], gi|190690113|gb|ACE86831.1| lamin A/C protein [synthetic construct], gi|190691485|gb|ACE87517.1| lamin A/C protein [synthetic construct] [MASS=74139]	gi|27436946,gi|57014043	74064.6	1	25	0.438	QNGDDPLLTYR	0.927	0
300mM with BAF	lamin A/C isoform 1 precursor [Homo sapiens], gi|125962|sp|P02545|LMNA_HUMAN Lamin-A/C (70 kDa lamin) (Renal carcinoma antigen NY-REN-32), gi|54035059|gb|AAH14507.1| Lamin A/C [Homo sapiens], gi|55957498|emb|CAI15522.1| lamin A/C [Homo sapiens], gi|190690113|gb|ACE86831.1| lamin A/C protein [synthetic construct], gi|190691485|gb|ACE87517.1| lamin A/C protein [synthetic construct] [MASS=74139]	gi|27436946,gi|57014043	74064.6	1	25	0.438	SGAQASSTPLSPTR	0.95	gi|74220835
300mM with BAF	lamin A/C isoform 1 precursor [Homo sapiens], gi|125962|sp|P02545|LMNA_HUMAN Lamin-A/C (70 kDa lamin) (Renal carcinoma antigen NY-REN-32), gi|54035059|gb|AAH14507.1| Lamin A/C [Homo sapiens], gi|55957498|emb|CAI15522.1| lamin A/C [Homo sapiens], gi|190690113|gb|ACE86831.1| lamin A/C protein [synthetic construct], gi|190691485|gb|ACE87517.1| lamin A/C protein [synthetic construct] [MASS=74139]	gi|27436946,gi|57014043	74064.6	1	25	0.438	SVGGSGGGSFGDNLVTR	0.95	0
300mM with BAF	lamin A/C isoform 1 precursor [Homo sapiens], gi|125962|sp|P02545|LMNA_HUMAN Lamin-A/C (70 kDa lamin) (Renal carcinoma antigen NY-REN-32), gi|54035059|gb|AAH14507.1| Lamin A/C [Homo sapiens], gi|55957498|emb|CAI15522.1| lamin A/C [Homo sapiens], gi|190690113|gb|ACE86831.1| lamin A/C protein [synthetic construct], gi|190691485|gb|ACE87517.1| lamin A/C protein [synthetic construct] [MASS=74139]	gi|27436946,gi|57014043	74064.6	1	25	0.438	TALINSTGEEVAMR	0.95	gi|74220835
300mM with BAF	lamin A/C isoform 1 precursor [Homo sapiens], gi|125962|sp|P02545|LMNA_HUMAN Lamin-A/C (70 kDa lamin) (Renal carcinoma antigen NY-REN-32), gi|54035059|gb|AAH14507.1| Lamin A/C [Homo sapiens], gi|55957498|emb|CAI15522.1| lamin A/C [Homo sapiens], gi|190690113|gb|ACE86831.1| lamin A/C protein [synthetic construct], gi|190691485|gb|ACE87517.1| lamin A/C protein [synthetic construct] [MASS=74139]	gi|27436946,gi|57014043	74064.6	1	25	0.438	TLEGELHDLR	0.649	gi|74220835
300mM with BAF	lamin A/C isoform 1 precursor [Homo sapiens], gi|125962|sp|P02545|LMNA_HUMAN Lamin-A/C (70 kDa lamin) (Renal carcinoma antigen NY-REN-32), gi|54035059|gb|AAH14507.1| Lamin A/C [Homo sapiens], gi|55957498|emb|CAI15522.1| lamin A/C [Homo sapiens], gi|190690113|gb|ACE86831.1| lamin A/C protein [synthetic construct], gi|190691485|gb|ACE87517.1| lamin A/C protein [synthetic construct] [MASS=74139]	gi|27436946,gi|57014043	74064.6	1	25	0.438	TVLCGTCGQPADK	0.95	0
300mM with BAF	lamin A/C isoform 1 precursor [Homo sapiens], gi|125962|sp|P02545|LMNA_HUMAN Lamin-A/C (70 kDa lamin) (Renal carcinoma antigen NY-REN-32), gi|54035059|gb|AAH14507.1| Lamin A/C [Homo sapiens], gi|55957498|emb|CAI15522.1| lamin A/C [Homo sapiens], gi|190690113|gb|ACE86831.1| lamin A/C protein [synthetic construct], gi|190691485|gb|ACE87517.1| lamin A/C protein [synthetic construct] [MASS=74139]	gi|27436946,gi|57014043	74064.6	1	25	0.438	VAVEEVDEEGK	0.95	0
300mM with BAF	lamin A/C isoform 1 precursor [Homo sapiens], gi|125962|sp|P02545|LMNA_HUMAN Lamin-A/C (70 kDa lamin) (Renal carcinoma antigen NY-REN-32), gi|54035059|gb|AAH14507.1| Lamin A/C [Homo sapiens], gi|55957498|emb|CAI15522.1| lamin A/C [Homo sapiens], gi|190690113|gb|ACE86831.1| lamin A/C protein [synthetic construct], gi|190691485|gb|ACE87517.1| lamin A/C protein [synthetic construct] [MASS=74139]	gi|27436946,gi|57014043	74064.6	1	25	0.438	VAVEEVDEEGKFVR	0.95	0
300mM with BAF	RecName: Full=Serum albumin; AltName: Full=BSA; AltName:	gi|1351907,gi|30794280,gi|74267962	69306.2	1	3	0.0527	CCTESLVNR	0.886	gi|28590,gi|229552
300mM with BAF	RecName: Full=Serum albumin; AltName: Full=BSA; AltName:	gi|1351907,gi|30794280,gi|74267962	69306.2	1	3	0.0527	HLVDEPQNLIK	0.95	gi|229552
300mM with BAF	RecName: Full=Serum albumin; AltName: Full=BSA; AltName:	gi|1351907,gi|30794280,gi|74267962	69306.2	1	3	0.0527	YICDNQDTISSK	0.95	0
300mM with BAF	retinoblastoma-binding protein mRbAp48.	gi|1016275,gi|109001624,gi|109475540,gi|5032027,gi|55725402,gi|73949950,gi|88930444,gi|90101524	46140.5	1	6	0.141	EAAFDDAVEER	0.95	0
300mM with BAF	retinoblastoma-binding protein mRbAp48.	gi|1016275,gi|109001624,gi|109475540,gi|5032027,gi|55725402,gi|73949950,gi|88930444,gi|90101524	46140.5	1	6	0.141	GEFGGFGSVSGK	0.95	0
300mM with BAF	retinoblastoma-binding protein mRbAp48.	gi|1016275,gi|109001624,gi|109475540,gi|5032027,gi|55725402,gi|73949950,gi|88930444,gi|90101524	46140.5	1	6	0.141	IEIEIK	0.766	0
300mM with BAF	retinoblastoma-binding protein mRbAp48.	gi|1016275,gi|109001624,gi|109475540,gi|5032027,gi|55725402,gi|73949950,gi|88930444,gi|90101524	46140.5	1	6	0.141	LNVWDLSK	0.95	gi|77736219,gi|26347165,gi|57209889,gi|57209888,gi|74138714,gi|157909799,gi|74006537,gi|109130029,gi|74189353,gi|4506439,gi|74006529,gi|74006535,gi|74006531,gi|74006545
300mM with BAF	retinoblastoma-binding protein mRbAp48.	gi|1016275,gi|109001624,gi|109475540,gi|5032027,gi|55725402,gi|73949950,gi|88930444,gi|90101524	46140.5	1	6	0.141	TPSSDVLVFDYTK	0.95	gi|77736219,gi|26347165,gi|57209889,gi|57209888,gi|74138714,gi|157909799,gi|74006537,gi|109130029,gi|74189353,gi|4506439,gi|74006529,gi|74006535,gi|74006531,gi|74006545
300mM with BAF	retinoblastoma-binding protein mRbAp48.	gi|1016275,gi|109001624,gi|109475540,gi|5032027,gi|55725402,gi|73949950,gi|88930444,gi|90101524	46140.5	1	6	0.141	TVALWDLR	0.95	gi|77736219,gi|26347165,gi|57209889,gi|57209888,gi|74138714,gi|157909799,gi|74006537,gi|109130029,gi|74189353,gi|4506439,gi|74006529,gi|74006535,gi|74006531,gi|74006545
300mM with BAF	RecName: Full=Histone H1.1; AltName: Full=CTL-1.	gi|121903,gi|45479844,gi|4885375,gi|68534962,gi|74003979	10347.4	0.998	2	0.212	KASGPPVSELITK	0.95	gi|57110429,gi|74004254
300mM with BAF	RecName: Full=Histone H1.1; AltName: Full=CTL-1.	gi|121903,gi|45479844,gi|4885375,gi|68534962,gi|74003979	10347.4	0.998	2	0.212	SGVSLAALK	0.95	0
300mM with BAF	Snrpf protein [Mus musculus].	gi|41946811,gi|4507131,gi|73978207,gi|74189295,gi|74353864,gi|83027678,gi|94372795	19790.3	0.897	1	0.0718	GVEEEEEDGEMRE	0.95	0
300mM with BAF	histone cluster 1, H2bn [Bos taurus].	gi|126165296	13905.5	0.897	1	0.19	AMGNMNSFVNDIFER	0.95	0
300mM with BAF	histone cluster 1, H2bn [Bos taurus].	gi|126165296	13905.5	0.897	1	0.19	LLLPGELAK	0.95	gi|10800140,gi|27693390,gi|46049029,gi|13386452,gi|109017921,gi|55589506,gi|109070012,gi|74004213,gi|4504277,gi|74003971,gi|61835422,gi|68532405,gi|61827353,gi|20336754,gi|31979,gi|184086,gi|68226431,gi|28173554,gi|32113,gi|73975428,gi|16306566
300mM with BAF	poly (ADP-ribose) polymerase family, member 1 [Homo sapiens], gi|130781|sp|P09874|PARP1_HUMAN Poly [ADP-ribose] polymerase 1 (PARP-1) (ADPRT) (NAD(+) ADP-ribosyltransferase 1) (Poly[ADP-ribose] synthetase 1), gi|21693601|gb|AAM75364.1|AF524947_1 ADP-ribosyltransferase (NAD+; poly (ADP-ribose) polymerase) [Homo sapiens], gi|178190|gb|AAA51663.1| NAD+ ADP-ribosyltransferase, gi|55663671|emb|CAH7021…	gi|156523968	113070	1	31	0.354	AEPVEVVAPR	0.95	gi|178152
300mM with BAF	poly (ADP-ribose) polymerase family, member 1 [Homo sapiens], gi|130781|sp|P09874|PARP1_HUMAN Poly [ADP-ribose] polymerase 1 (PARP-1) (ADPRT) (NAD(+) ADP-ribosyltransferase 1) (Poly[ADP-ribose] synthetase 1), gi|21693601|gb|AAM75364.1|AF524947_1 ADP-ribosyltransferase (NAD+; poly (ADP-ribose) polymerase) [Homo sapiens], gi|178190|gb|AAA51663.1| NAD+ ADP-ribosyltransferase, gi|55663671|emb|CAH7021…	gi|156523968	113070	1	31	0.354	AMVEYEIDLQK	0.95	gi|178152
300mM with BAF	poly (ADP-ribose) polymerase family, member 1 [Homo sapiens], gi|130781|sp|P09874|PARP1_HUMAN Poly [ADP-ribose] polymerase 1 (PARP-1) (ADPRT) (NAD(+) ADP-ribosyltransferase 1) (Poly[ADP-ribose] synthetase 1), gi|21693601|gb|AAM75364.1|AF524947_1 ADP-ribosyltransferase (NAD+; poly (ADP-ribose) polymerase) [Homo sapiens], gi|178190|gb|AAA51663.1| NAD+ ADP-ribosyltransferase, gi|55663671|emb|CAH7021…	gi|156523968	113070	1	31	0.354	AQNDLIWNIK	0.95	0
300mM with BAF	poly (ADP-ribose) polymerase family, member 1 [Homo sapiens], gi|130781|sp|P09874|PARP1_HUMAN Poly [ADP-ribose] polymerase 1 (PARP-1) (ADPRT) (NAD(+) ADP-ribosyltransferase 1) (Poly[ADP-ribose] synthetase 1), gi|21693601|gb|AAM75364.1|AF524947_1 ADP-ribosyltransferase (NAD+; poly (ADP-ribose) polymerase) [Homo sapiens], gi|178190|gb|AAA51663.1| NAD+ ADP-ribosyltransferase, gi|55663671|emb|CAH7021…	gi|156523968	113070	1	31	0.354	ASLCISTK	0.95	0
300mM with BAF	poly (ADP-ribose) polymerase family, member 1 [Homo sapiens], gi|130781|sp|P09874|PARP1_HUMAN Poly [ADP-ribose] polymerase 1 (PARP-1) (ADPRT) (NAD(+) ADP-ribosyltransferase 1) (Poly[ADP-ribose] synthetase 1), gi|21693601|gb|AAM75364.1|AF524947_1 ADP-ribosyltransferase (NAD+; poly (ADP-ribose) polymerase) [Homo sapiens], gi|178190|gb|AAA51663.1| NAD+ ADP-ribosyltransferase, gi|55663671|emb|CAH7021…	gi|156523968	113070	1	31	0.354	DSEEAEIIR	0.95	gi|178152
300mM with BAF	poly (ADP-ribose) polymerase family, member 1 [Homo sapiens], gi|130781|sp|P09874|PARP1_HUMAN Poly [ADP-ribose] polymerase 1 (PARP-1) (ADPRT) (NAD(+) ADP-ribosyltransferase 1) (Poly[ADP-ribose] synthetase 1), gi|21693601|gb|AAM75364.1|AF524947_1 ADP-ribosyltransferase (NAD+; poly (ADP-ribose) polymerase) [Homo sapiens], gi|178190|gb|AAA51663.1| NAD+ ADP-ribosyltransferase, gi|55663671|emb|CAH7021…	gi|156523968	113070	1	31	0.354	EELGFRPEYSASQLK	0.95	0
300mM with BAF	poly (ADP-ribose) polymerase family, member 1 [Homo sapiens], gi|130781|sp|P09874|PARP1_HUMAN Poly [ADP-ribose] polymerase 1 (PARP-1) (ADPRT) (NAD(+) ADP-ribosyltransferase 1) (Poly[ADP-ribose] synthetase 1), gi|21693601|gb|AAM75364.1|AF524947_1 ADP-ribosyltransferase (NAD+; poly (ADP-ribose) polymerase) [Homo sapiens], gi|178190|gb|AAA51663.1| NAD+ ADP-ribosyltransferase, gi|55663671|emb|CAH7021…	gi|156523968	113070	1	31	0.354	ELLIFNK	0.95	0
300mM with BAF	poly (ADP-ribose) polymerase family, member 1 [Homo sapiens], gi|130781|sp|P09874|PARP1_HUMAN Poly [ADP-ribose] polymerase 1 (PARP-1) (ADPRT) (NAD(+) ADP-ribosyltransferase 1) (Poly[ADP-ribose] synthetase 1), gi|21693601|gb|AAM75364.1|AF524947_1 ADP-ribosyltransferase (NAD+; poly (ADP-ribose) polymerase) [Homo sapiens], gi|178190|gb|AAA51663.1| NAD+ ADP-ribosyltransferase, gi|55663671|emb|CAH7021…	gi|156523968	113070	1	31	0.354	EWVTPK	0.912	0
300mM with BAF	poly (ADP-ribose) polymerase family, member 1 [Homo sapiens], gi|130781|sp|P09874|PARP1_HUMAN Poly [ADP-ribose] polymerase 1 (PARP-1) (ADPRT) (NAD(+) ADP-ribosyltransferase 1) (Poly[ADP-ribose] synthetase 1), gi|21693601|gb|AAM75364.1|AF524947_1 ADP-ribosyltransferase (NAD+; poly (ADP-ribose) polymerase) [Homo sapiens], gi|178190|gb|AAA51663.1| NAD+ ADP-ribosyltransferase, gi|55663671|emb|CAH7021…	gi|156523968	113070	1	31	0.354	GDEVDGVDEVAK	0.95	0
300mM with BAF	poly (ADP-ribose) polymerase family, member 1 [Homo sapiens], gi|130781|sp|P09874|PARP1_HUMAN Poly [ADP-ribose] polymerase 1 (PARP-1) (ADPRT) (NAD(+) ADP-ribosyltransferase 1) (Poly[ADP-ribose] synthetase 1), gi|21693601|gb|AAM75364.1|AF524947_1 ADP-ribosyltransferase (NAD+; poly (ADP-ribose) polymerase) [Homo sapiens], gi|178190|gb|AAA51663.1| NAD+ ADP-ribosyltransferase, gi|55663671|emb|CAH7021…	gi|156523968	113070	1	31	0.354	GFSLLATEDK	0.95	0
300mM with BAF	poly (ADP-ribose) polymerase family, member 1 [Homo sapiens], gi|130781|sp|P09874|PARP1_HUMAN Poly [ADP-ribose] polymerase 1 (PARP-1) (ADPRT) (NAD(+) ADP-ribosyltransferase 1) (Poly[ADP-ribose] synthetase 1), gi|21693601|gb|AAM75364.1|AF524947_1 ADP-ribosyltransferase (NAD+; poly (ADP-ribose) polymerase) [Homo sapiens], gi|178190|gb|AAA51663.1| NAD+ ADP-ribosyltransferase, gi|55663671|emb|CAH7021…	gi|156523968	113070	1	31	0.354	GFSLLATEDKEALK	0.95	0
300mM with BAF	poly (ADP-ribose) polymerase family, member 1 [Homo sapiens], gi|130781|sp|P09874|PARP1_HUMAN Poly [ADP-ribose] polymerase 1 (PARP-1) (ADPRT) (NAD(+) ADP-ribosyltransferase 1) (Poly[ADP-ribose] synthetase 1), gi|21693601|gb|AAM75364.1|AF524947_1 ADP-ribosyltransferase (NAD+; poly (ADP-ribose) polymerase) [Homo sapiens], gi|178190|gb|AAA51663.1| NAD+ ADP-ribosyltransferase, gi|55663671|emb|CAH7021…	gi|156523968	113070	1	31	0.354	GGAAVDPDSGLEHSAHVLEK	0.95	gi|178152
300mM with BAF	poly (ADP-ribose) polymerase family, member 1 [Homo sapiens], gi|130781|sp|P09874|PARP1_HUMAN Poly [ADP-ribose] polymerase 1 (PARP-1) (ADPRT) (NAD(+) ADP-ribosyltransferase 1) (Poly[ADP-ribose] synthetase 1), gi|21693601|gb|AAM75364.1|AF524947_1 ADP-ribosyltransferase (NAD+; poly (ADP-ribose) polymerase) [Homo sapiens], gi|178190|gb|AAA51663.1| NAD+ ADP-ribosyltransferase, gi|55663671|emb|CAH7021…	gi|156523968	113070	1	31	0.354	GGSDDSSKDPIDVNYEK	0.95	gi|178152
300mM with BAF	poly (ADP-ribose) polymerase family, member 1 [Homo sapiens], gi|130781|sp|P09874|PARP1_HUMAN Poly [ADP-ribose] polymerase 1 (PARP-1) (ADPRT) (NAD(+) ADP-ribosyltransferase 1) (Poly[ADP-ribose] synthetase 1), gi|21693601|gb|AAM75364.1|AF524947_1 ADP-ribosyltransferase (NAD+; poly (ADP-ribose) polymerase) [Homo sapiens], gi|178190|gb|AAA51663.1| NAD+ ADP-ribosyltransferase, gi|55663671|emb|CAH7021…	gi|156523968	113070	1	31	0.354	GIYFADMVSK	0.95	gi|178152
300mM with BAF	poly (ADP-ribose) polymerase family, member 1 [Homo sapiens], gi|130781|sp|P09874|PARP1_HUMAN Poly [ADP-ribose] polymerase 1 (PARP-1) (ADPRT) (NAD(+) ADP-ribosyltransferase 1) (Poly[ADP-ribose] synthetase 1), gi|21693601|gb|AAM75364.1|AF524947_1 ADP-ribosyltransferase (NAD+; poly (ADP-ribose) polymerase) [Homo sapiens], gi|178190|gb|AAA51663.1| NAD+ ADP-ribosyltransferase, gi|55663671|emb|CAH7021…	gi|156523968	113070	1	31	0.354	HPDVEVDGFSELR	0.95	0
300mM with BAF	poly (ADP-ribose) polymerase family, member 1 [Homo sapiens], gi|130781|sp|P09874|PARP1_HUMAN Poly [ADP-ribose] polymerase 1 (PARP-1) (ADPRT) (NAD(+) ADP-ribosyltransferase 1) (Poly[ADP-ribose] synthetase 1), gi|21693601|gb|AAM75364.1|AF524947_1 ADP-ribosyltransferase (NAD+; poly (ADP-ribose) polymerase) [Homo sapiens], gi|178190|gb|AAA51663.1| NAD+ ADP-ribosyltransferase, gi|55663671|emb|CAH7021…	gi|156523968	113070	1	31	0.354	IAPPEAPVTGYMFGK	0.95	gi|178152
300mM with BAF	poly (ADP-ribose) polymerase family, member 1 [Homo sapiens], gi|130781|sp|P09874|PARP1_HUMAN Poly [ADP-ribose] polymerase 1 (PARP-1) (ADPRT) (NAD(+) ADP-ribosyltransferase 1) (Poly[ADP-ribose] synthetase 1), gi|21693601|gb|AAM75364.1|AF524947_1 ADP-ribosyltransferase (NAD+; poly (ADP-ribose) polymerase) [Homo sapiens], gi|178190|gb|AAA51663.1| NAD+ ADP-ribosyltransferase, gi|55663671|emb|CAH7021…	gi|156523968	113070	1	31	0.354	KGDEVDGVDEVAK	0.95	0
300mM with BAF	poly (ADP-ribose) polymerase family, member 1 [Homo sapiens], gi|130781|sp|P09874|PARP1_HUMAN Poly [ADP-ribose] polymerase 1 (PARP-1) (ADPRT) (NAD(+) ADP-ribosyltransferase 1) (Poly[ADP-ribose] synthetase 1), gi|21693601|gb|AAM75364.1|AF524947_1 ADP-ribosyltransferase (NAD+; poly (ADP-ribose) polymerase) [Homo sapiens], gi|178190|gb|AAA51663.1| NAD+ ADP-ribosyltransferase, gi|55663671|emb|CAH7021…	gi|156523968	113070	1	31	0.354	LEQMPSKEDAIEHFMK	0.95	0
300mM with BAF	poly (ADP-ribose) polymerase family, member 1 [Homo sapiens], gi|130781|sp|P09874|PARP1_HUMAN Poly [ADP-ribose] polymerase 1 (PARP-1) (ADPRT) (NAD(+) ADP-ribosyltransferase 1) (Poly[ADP-ribose] synthetase 1), gi|21693601|gb|AAM75364.1|AF524947_1 ADP-ribosyltransferase (NAD+; poly (ADP-ribose) polymerase) [Homo sapiens], gi|178190|gb|AAA51663.1| NAD+ ADP-ribosyltransferase, gi|55663671|emb|CAH7021…	gi|156523968	113070	1	31	0.354	LQLLEDDKENR	0.95	gi|178152
300mM with BAF	poly (ADP-ribose) polymerase family, member 1 [Homo sapiens], gi|130781|sp|P09874|PARP1_HUMAN Poly [ADP-ribose] polymerase 1 (PARP-1) (ADPRT) (NAD(+) ADP-ribosyltransferase 1) (Poly[ADP-ribose] synthetase 1), gi|21693601|gb|AAM75364.1|AF524947_1 ADP-ribosyltransferase (NAD+; poly (ADP-ribose) polymerase) [Homo sapiens], gi|178190|gb|AAA51663.1| NAD+ ADP-ribosyltransferase, gi|55663671|emb|CAH7021…	gi|156523968	113070	1	31	0.354	MVDPEKPQLGMIDR	0.869	0
300mM with BAF	poly (ADP-ribose) polymerase family, member 1 [Homo sapiens], gi|130781|sp|P09874|PARP1_HUMAN Poly [ADP-ribose] polymerase 1 (PARP-1) (ADPRT) (NAD(+) ADP-ribosyltransferase 1) (Poly[ADP-ribose] synthetase 1), gi|21693601|gb|AAM75364.1|AF524947_1 ADP-ribosyltransferase (NAD+; poly (ADP-ribose) polymerase) [Homo sapiens], gi|178190|gb|AAA51663.1| NAD+ ADP-ribosyltransferase, gi|55663671|emb|CAH7021…	gi|156523968	113070	1	31	0.354	NREELGFRPEYSASQLK	0.95	0
300mM with BAF	poly (ADP-ribose) polymerase family, member 1 [Homo sapiens], gi|130781|sp|P09874|PARP1_HUMAN Poly [ADP-ribose] polymerase 1 (PARP-1) (ADPRT) (NAD(+) ADP-ribosyltransferase 1) (Poly[ADP-ribose] synthetase 1), gi|21693601|gb|AAM75364.1|AF524947_1 ADP-ribosyltransferase (NAD+; poly (ADP-ribose) polymerase) [Homo sapiens], gi|178190|gb|AAA51663.1| NAD+ ADP-ribosyltransferase, gi|55663671|emb|CAH7021…	gi|156523968	113070	1	31	0.354	QIQAAYSILSEVQQAVSQGSSDSQILDLSNR	0.95	gi|178152
300mM with BAF	poly (ADP-ribose) polymerase family, member 1 [Homo sapiens], gi|130781|sp|P09874|PARP1_HUMAN Poly [ADP-ribose] polymerase 1 (PARP-1) (ADPRT) (NAD(+) ADP-ribosyltransferase 1) (Poly[ADP-ribose] synthetase 1), gi|21693601|gb|AAM75364.1|AF524947_1 ADP-ribosyltransferase (NAD+; poly (ADP-ribose) polymerase) [Homo sapiens], gi|178190|gb|AAA51663.1| NAD+ ADP-ribosyltransferase, gi|55663671|emb|CAH7021…	gi|156523968	113070	1	31	0.354	QQVPSGESAILDR	0.95	0
300mM with BAF	poly (ADP-ribose) polymerase family, member 1 [Homo sapiens], gi|130781|sp|P09874|PARP1_HUMAN Poly [ADP-ribose] polymerase 1 (PARP-1) (ADPRT) (NAD(+) ADP-ribosyltransferase 1) (Poly[ADP-ribose] synthetase 1), gi|21693601|gb|AAM75364.1|AF524947_1 ADP-ribosyltransferase (NAD+; poly (ADP-ribose) polymerase) [Homo sapiens], gi|178190|gb|AAA51663.1| NAD+ ADP-ribosyltransferase, gi|55663671|emb|CAH7021…	gi|156523968	113070	1	31	0.354	RQIQAAYSILSEVQQAVSQGSSDSQILDLSNR	0.95	gi|178152
300mM with BAF	poly (ADP-ribose) polymerase family, member 1 [Homo sapiens], gi|130781|sp|P09874|PARP1_HUMAN Poly [ADP-ribose] polymerase 1 (PARP-1) (ADPRT) (NAD(+) ADP-ribosyltransferase 1) (Poly[ADP-ribose] synthetase 1), gi|21693601|gb|AAM75364.1|AF524947_1 ADP-ribosyltransferase (NAD+; poly (ADP-ribose) polymerase) [Homo sapiens], gi|178190|gb|AAA51663.1| NAD+ ADP-ribosyltransferase, gi|55663671|emb|CAH7021…	gi|156523968	113070	1	31	0.354	SDAYYCTGDVTAWTK	0.95	0
300mM with BAF	poly (ADP-ribose) polymerase family, member 1 [Homo sapiens], gi|130781|sp|P09874|PARP1_HUMAN Poly [ADP-ribose] polymerase 1 (PARP-1) (ADPRT) (NAD(+) ADP-ribosyltransferase 1) (Poly[ADP-ribose] synthetase 1), gi|21693601|gb|AAM75364.1|AF524947_1 ADP-ribosyltransferase (NAD+; poly (ADP-ribose) polymerase) [Homo sapiens], gi|178190|gb|AAA51663.1| NAD+ ADP-ribosyltransferase, gi|55663671|emb|CAH7021…	gi|156523968	113070	1	31	0.354	SKLPKPVQDLIK	0.519	gi|178152
300mM with BAF	poly (ADP-ribose) polymerase family, member 1 [Homo sapiens], gi|130781|sp|P09874|PARP1_HUMAN Poly [ADP-ribose] polymerase 1 (PARP-1) (ADPRT) (NAD(+) ADP-ribosyltransferase 1) (Poly[ADP-ribose] synthetase 1), gi|21693601|gb|AAM75364.1|AF524947_1 ADP-ribosyltransferase (NAD+; poly (ADP-ribose) polymerase) [Homo sapiens], gi|178190|gb|AAA51663.1| NAD+ ADP-ribosyltransferase, gi|55663671|emb|CAH7021…	gi|156523968	113070	1	31	0.354	TLGDFAAEYAK	0.95	0
300mM with BAF	poly (ADP-ribose) polymerase family, member 1 [Homo sapiens], gi|130781|sp|P09874|PARP1_HUMAN Poly [ADP-ribose] polymerase 1 (PARP-1) (ADPRT) (NAD(+) ADP-ribosyltransferase 1) (Poly[ADP-ribose] synthetase 1), gi|21693601|gb|AAM75364.1|AF524947_1 ADP-ribosyltransferase (NAD+; poly (ADP-ribose) polymerase) [Homo sapiens], gi|178190|gb|AAA51663.1| NAD+ ADP-ribosyltransferase, gi|55663671|emb|CAH7021…	gi|156523968	113070	1	31	0.354	VADGMVFGALLPCEECSGQLVFK	0.95	0
300mM with BAF	poly (ADP-ribose) polymerase family, member 1 [Homo sapiens], gi|130781|sp|P09874|PARP1_HUMAN Poly [ADP-ribose] polymerase 1 (PARP-1) (ADPRT) (NAD(+) ADP-ribosyltransferase 1) (Poly[ADP-ribose] synthetase 1), gi|21693601|gb|AAM75364.1|AF524947_1 ADP-ribosyltransferase (NAD+; poly (ADP-ribose) polymerase) [Homo sapiens], gi|178190|gb|AAA51663.1| NAD+ ADP-ribosyltransferase, gi|55663671|emb|CAH7021…	gi|156523968	113070	1	31	0.354	VFSATLGLVDIVK	0.95	gi|178152
300mM with BAF	poly (ADP-ribose) polymerase family, member 1 [Homo sapiens], gi|130781|sp|P09874|PARP1_HUMAN Poly [ADP-ribose] polymerase 1 (PARP-1) (ADPRT) (NAD(+) ADP-ribosyltransferase 1) (Poly[ADP-ribose] synthetase 1), gi|21693601|gb|AAM75364.1|AF524947_1 ADP-ribosyltransferase (NAD+; poly (ADP-ribose) polymerase) [Homo sapiens], gi|178190|gb|AAA51663.1| NAD+ ADP-ribosyltransferase, gi|55663671|emb|CAH7021…	gi|156523968	113070	1	31	0.354	VVDRDSEEAEIIR	0.95	gi|178152
300mM with BAF	poly (ADP-ribose) polymerase family, member 1 [Homo sapiens], gi|130781|sp|P09874|PARP1_HUMAN Poly [ADP-ribose] polymerase 1 (PARP-1) (ADPRT) (NAD(+) ADP-ribosyltransferase 1) (Poly[ADP-ribose] synthetase 1), gi|21693601|gb|AAM75364.1|AF524947_1 ADP-ribosyltransferase (NAD+; poly (ADP-ribose) polymerase) [Homo sapiens], gi|178190|gb|AAA51663.1| NAD+ ADP-ribosyltransferase, gi|55663671|emb|CAH7021…	gi|156523968	113070	1	31	0.354	VVSEDFLQDVSASTK	0.95	gi|178152
300mM with BAF	poly(ADP-ribose) polymerase.	gi|178152	64199.8	0.897	1	0.34	AEPVEVVAPR	0.95	gi|156523968
300mM with BAF	poly(ADP-ribose) polymerase.	gi|178152	64199.8	0.897	1	0.34	AMVEYEIDLQK	0.95	gi|156523968
300mM with BAF	poly(ADP-ribose) polymerase.	gi|178152	64199.8	0.897	1	0.34	DSEEAEIIR	0.95	gi|156523968
300mM with BAF	poly(ADP-ribose) polymerase.	gi|178152	64199.8	0.897	1	0.34	GGAAVDPDSGLEHSAHVLEK	0.95	gi|156523968
300mM with BAF	poly(ADP-ribose) polymerase.	gi|178152	64199.8	0.897	1	0.34	GGSDDSSKDPIDVNYEK	0.95	gi|156523968
300mM with BAF	poly(ADP-ribose) polymerase.	gi|178152	64199.8	0.897	1	0.34	GIYFADMVSK	0.95	gi|156523968
300mM with BAF	poly(ADP-ribose) polymerase.	gi|178152	64199.8	0.897	1	0.34	IAPPEAPVTGYMFGK	0.95	gi|156523968
300mM with BAF	poly(ADP-ribose) polymerase.	gi|178152	64199.8	0.897	1	0.34	LEQMPSKEDANEHFMK	0.95	0
300mM with BAF	poly(ADP-ribose) polymerase.	gi|178152	64199.8	0.897	1	0.34	LQLLEDDKENR	0.95	gi|156523968
300mM with BAF	poly(ADP-ribose) polymerase.	gi|178152	64199.8	0.897	1	0.34	QIQAAYSILSEVQQAVSQGSSDSQILDLSNR	0.95	gi|156523968
300mM with BAF	poly(ADP-ribose) polymerase.	gi|178152	64199.8	0.897	1	0.34	RQIQAAYSILSEVQQAVSQGSSDSQILDLSNR	0.95	gi|156523968
300mM with BAF	poly(ADP-ribose) polymerase.	gi|178152	64199.8	0.897	1	0.34	SKLPKPVQDLIK	0.519	gi|156523968
300mM with BAF	poly(ADP-ribose) polymerase.	gi|178152	64199.8	0.897	1	0.34	VFSATLGLVDIVK	0.95	gi|156523968
300mM with BAF	poly(ADP-ribose) polymerase.	gi|178152	64199.8	0.897	1	0.34	VVDRDSEEAEIIR	0.95	gi|156523968
300mM with BAF	poly(ADP-ribose) polymerase.	gi|178152	64199.8	0.897	1	0.34	VVSEDFLQDVSASTK	0.95	gi|156523968
300mM with BAF	PREDICTED: similar to Histone H1.5 (Histone H1a) [Canis familiaris]	gi|57110429,gi|74004254	21911.7	0.897	1	0.101	KASGPPVSELITK	0.95	gi|68534962,gi|4885375,gi|121903,gi|74003979,gi|45479844
300mM with BAF	PREDICTED: similar to Histone H1.5 (Histone H1a) [Canis familiaris]	gi|57110429,gi|74004254	21911.7	0.897	1	0.101	NGLSLAALK	0.95	gi|4885381,gi|109070064,gi|55626268
300mM with BAF	PREDICTED: similar to Histone H1.5 (Histone H1a) [Macaca mulatta].	gi|109070064,gi|4885381,gi|55626268	22563.7	0.943	2	0.146	ALAAGGYDVEK	0.566	0
300mM with BAF	PREDICTED: similar to Histone H1.5 (Histone H1a) [Macaca mulatta].	gi|109070064,gi|4885381,gi|55626268	22563.7	0.943	2	0.146	KATGPPVSELITK	0.869	0
300mM with BAF	PREDICTED: similar to Histone H1.5 (Histone H1a) [Macaca mulatta].	gi|109070064,gi|4885381,gi|55626268	22563.7	0.943	2	0.146	NGLSLAALK	0.95	gi|57110429,gi|74004254
300mM with BAF	PREDICTED: heterogeneous nuclear ribonucleoprotein C (C1/C2)	gi|109082735,gi|109082741,gi|109083272,gi|117189975,gi|117190174,gi|13937888,gi|14249959,gi|14250048,gi|306875,gi|337455,gi|33877030,gi|55824558,gi|61966711,gi|62088634	32376.1	0.984	2	0.0751	LKGDDLQAIK	0.69	0
300mM with BAF	PREDICTED: heterogeneous nuclear ribonucleoprotein C (C1/C2)	gi|109082735,gi|109082741,gi|109083272,gi|117189975,gi|117190174,gi|13937888,gi|14249959,gi|14250048,gi|306875,gi|337455,gi|33877030,gi|55824558,gi|61966711,gi|62088634	32376.1	0.984	2	0.0751	QKVDSLLENLEK	0.95	0
300mM with BAF	dpy-30-like protein [Homo sapiens], gi|118150944|ref|NP_001071384.1| dpy-30-like protein [Bos taurus], gi|109102578|ref|XP_001105547.1| PREDICTED: similar to dpy-30-like protein isoform 1 [Macaca mulatta], gi|109102580|ref|XP_001105621.1| PREDICTED: similar to dpy-30-like protein isoform 2 [Macaca mulatta], gi|114576875|ref|XP_001164263.1| PREDICTED: dpy-30-like protein isoform 1 [Pan troglodytes…	gi|14211889,gi|14916554,gi|57098223	11194.8	1	3	0.455	AYLDQTVVPILLQGLAVLAK	0.95	0
300mM with BAF	dpy-30-like protein [Homo sapiens], gi|118150944|ref|NP_001071384.1| dpy-30-like protein [Bos taurus], gi|109102578|ref|XP_001105547.1| PREDICTED: similar to dpy-30-like protein isoform 1 [Macaca mulatta], gi|109102580|ref|XP_001105621.1| PREDICTED: similar to dpy-30-like protein isoform 2 [Macaca mulatta], gi|114576875|ref|XP_001164263.1| PREDICTED: dpy-30-like protein isoform 1 [Pan troglodytes…	gi|14211889,gi|14916554,gi|57098223	11194.8	1	3	0.455	ERPPNPIEFLASYLLK	0.95	0
300mM with BAF	dpy-30-like protein [Homo sapiens], gi|118150944|ref|NP_001071384.1| dpy-30-like protein [Bos taurus], gi|109102578|ref|XP_001105547.1| PREDICTED: similar to dpy-30-like protein isoform 1 [Macaca mulatta], gi|109102580|ref|XP_001105621.1| PREDICTED: similar to dpy-30-like protein isoform 2 [Macaca mulatta], gi|114576875|ref|XP_001164263.1| PREDICTED: dpy-30-like protein isoform 1 [Pan troglodytes…	gi|14211889,gi|14916554,gi|57098223	11194.8	1	3	0.455	VDLQSLPTR	0.95	0
300mM with BAF	PREDICTED: similar to histone deacetylase 1 [Macaca mulatta]	gi|109001148,gi|13128860,gi|1665723,gi|2347180,gi|56203669,gi|62655265,gi|6680193,gi|70794768,gi|73949981,gi|73949989,gi|82697313	55058.1	0.897	1	0.0685	SIRPDNMSEYSK	0.801	gi|1667394,gi|3023934,gi|62666128,gi|73974025,gi|68068066,gi|71051977,gi|87162464
300mM with BAF	PREDICTED: similar to histone deacetylase 1 [Macaca mulatta]	gi|109001148,gi|13128860,gi|1665723,gi|2347180,gi|56203669,gi|62655265,gi|6680193,gi|70794768,gi|73949981,gi|73949989,gi|82697313	55058.1	0.897	1	0.0685	YGEYFPGTGDLR	0.95	gi|1667394,gi|3023934,gi|62666128,gi|73974025,gi|68068066,gi|71051977,gi|87162464
300mM with BAF	PREDICTED: similar to histone deacetylase 1 [Macaca mulatta]	gi|109001148,gi|13128860,gi|1665723,gi|2347180,gi|56203669,gi|62655265,gi|6680193,gi|70794768,gi|73949981,gi|73949989,gi|82697313	55058.1	0.897	1	0.0685	YYAVNYPLR	0.95	0
300mM with BAF	damage-specific DNA binding protein 1 [Homo sapiens], gi|12643730|sp|Q16531.1|DDB1_HUMAN DNA damage-binding protein 1 (Damage-specific DNA-binding protein 1) (UV-damaged DNA-binding factor) (DDB p127 subunit) (DNA damage-binding protein a) (DDBa) (UV-damaged DNA-binding protein 1) (UV-DDB 1) (Xeroderma pigmentosum group E-complementing protein) (XPCe) (XPE-binding factor) (XPE-BF) (HBV X-associat…	gi|148529014,gi|418316,gi|73983859,gi|74138855,gi|74178494,gi|74215029,gi|7657011,gi|81868411,gi|90108797	126972	1	9	0.086	ALVSEWK	0.691	0
300mM with BAF	damage-specific DNA binding protein 1 [Homo sapiens], gi|12643730|sp|Q16531.1|DDB1_HUMAN DNA damage-binding protein 1 (Damage-specific DNA-binding protein 1) (UV-damaged DNA-binding factor) (DDB p127 subunit) (DNA damage-binding protein a) (DDBa) (UV-damaged DNA-binding protein 1) (UV-DDB 1) (Xeroderma pigmentosum group E-complementing protein) (XPCe) (XPE-binding factor) (XPE-BF) (HBV X-associat…	gi|148529014,gi|418316,gi|73983859,gi|74138855,gi|74178494,gi|74215029,gi|7657011,gi|81868411,gi|90108797	126972	1	9	0.086	GAVYSMVEFNGK	0.95	0
300mM with BAF	damage-specific DNA binding protein 1 [Homo sapiens], gi|12643730|sp|Q16531.1|DDB1_HUMAN DNA damage-binding protein 1 (Damage-specific DNA-binding protein 1) (UV-damaged DNA-binding factor) (DDB p127 subunit) (DNA damage-binding protein a) (DDBa) (UV-damaged DNA-binding protein 1) (UV-DDB 1) (Xeroderma pigmentosum group E-complementing protein) (XPCe) (XPE-binding factor) (XPE-BF) (HBV X-associat…	gi|148529014,gi|418316,gi|73983859,gi|74138855,gi|74178494,gi|74215029,gi|7657011,gi|81868411,gi|90108797	126972	1	9	0.086	GDFILVGDLMR	0.95	0
300mM with BAF	damage-specific DNA binding protein 1 [Homo sapiens], gi|12643730|sp|Q16531.1|DDB1_HUMAN DNA damage-binding protein 1 (Damage-specific DNA-binding protein 1) (UV-damaged DNA-binding factor) (DDB p127 subunit) (DNA damage-binding protein a) (DDBa) (UV-damaged DNA-binding protein 1) (UV-DDB 1) (Xeroderma pigmentosum group E-complementing protein) (XPCe) (XPE-binding factor) (XPE-BF) (HBV X-associat…	gi|148529014,gi|418316,gi|73983859,gi|74138855,gi|74178494,gi|74215029,gi|7657011,gi|81868411,gi|90108797	126972	1	9	0.086	KVTLGTQPTVLR	0.931	0
300mM with BAF	damage-specific DNA binding protein 1 [Homo sapiens], gi|12643730|sp|Q16531.1|DDB1_HUMAN DNA damage-binding protein 1 (Damage-specific DNA-binding protein 1) (UV-damaged DNA-binding factor) (DDB p127 subunit) (DNA damage-binding protein a) (DDBa) (UV-damaged DNA-binding protein 1) (UV-DDB 1) (Xeroderma pigmentosum group E-complementing protein) (XPCe) (XPE-binding factor) (XPE-BF) (HBV X-associat…	gi|148529014,gi|418316,gi|73983859,gi|74138855,gi|74178494,gi|74215029,gi|7657011,gi|81868411,gi|90108797	126972	1	9	0.086	LEIYVVTAEGLRPVK	0.744	0
300mM with BAF	damage-specific DNA binding protein 1 [Homo sapiens], gi|12643730|sp|Q16531.1|DDB1_HUMAN DNA damage-binding protein 1 (Damage-specific DNA-binding protein 1) (UV-damaged DNA-binding factor) (DDB p127 subunit) (DNA damage-binding protein a) (DDBa) (UV-damaged DNA-binding protein 1) (UV-DDB 1) (Xeroderma pigmentosum group E-complementing protein) (XPCe) (XPE-binding factor) (XPE-BF) (HBV X-associat…	gi|148529014,gi|418316,gi|73983859,gi|74138855,gi|74178494,gi|74215029,gi|7657011,gi|81868411,gi|90108797	126972	1	9	0.086	LYEWTTEK	0.734	0
300mM with BAF	damage-specific DNA binding protein 1 [Homo sapiens], gi|12643730|sp|Q16531.1|DDB1_HUMAN DNA damage-binding protein 1 (Damage-specific DNA-binding protein 1) (UV-damaged DNA-binding factor) (DDB p127 subunit) (DNA damage-binding protein a) (DDBa) (UV-damaged DNA-binding protein 1) (UV-DDB 1) (Xeroderma pigmentosum group E-complementing protein) (XPCe) (XPE-binding factor) (XPE-BF) (HBV X-associat…	gi|148529014,gi|418316,gi|73983859,gi|74138855,gi|74178494,gi|74215029,gi|7657011,gi|81868411,gi|90108797	126972	1	9	0.086	MQEVVANLQYDDGSGMK	0.95	0
300mM with BAF	damage-specific DNA binding protein 1 [Homo sapiens], gi|12643730|sp|Q16531.1|DDB1_HUMAN DNA damage-binding protein 1 (Damage-specific DNA-binding protein 1) (UV-damaged DNA-binding factor) (DDB p127 subunit) (DNA damage-binding protein a) (DDBa) (UV-damaged DNA-binding protein 1) (UV-DDB 1) (Xeroderma pigmentosum group E-complementing protein) (XPCe) (XPE-binding factor) (XPE-BF) (HBV X-associat…	gi|148529014,gi|418316,gi|73983859,gi|74138855,gi|74178494,gi|74215029,gi|7657011,gi|81868411,gi|90108797	126972	1	9	0.086	TYEVSLR	0.573	0
300mM with BAF	damage-specific DNA binding protein 1 [Homo sapiens], gi|12643730|sp|Q16531.1|DDB1_HUMAN DNA damage-binding protein 1 (Damage-specific DNA-binding protein 1) (UV-damaged DNA-binding factor) (DDB p127 subunit) (DNA damage-binding protein a) (DDBa) (UV-damaged DNA-binding protein 1) (UV-DDB 1) (Xeroderma pigmentosum group E-complementing protein) (XPCe) (XPE-binding factor) (XPE-BF) (HBV X-associat…	gi|148529014,gi|418316,gi|73983859,gi|74138855,gi|74178494,gi|74215029,gi|7657011,gi|81868411,gi|90108797	126972	1	9	0.086	YLLGDMEGR	0.95	0
300mM with BAF	KIAA0670 protein [Homo sapiens].	gi|27529720,gi|7513059,gi|7662238	145831	0.997	2	0.0241	KPSISITTESLK	0.947	0
300mM with BAF	KIAA0670 protein [Homo sapiens].	gi|27529720,gi|7513059,gi|7662238	145831	0.997	2	0.0241	LSEGSQPAEEEEDQETPSR	0.95	0
300mM with BAF	PREDICTED: U5 snRNP-specific protein, 116 kD [Macaca mulatta].	gi|109116261,gi|114666736,gi|197102166,gi|24474791,gi|30851704,gi|40788951,gi|41152056,gi|48145665,gi|50510335,gi|62657153,gi|6755594,gi|73965505,gi|74151971,gi|74226991	95355.7	0.897	1	0.0153	IAVEPVNPSELPK	0.95	0
300mM with BAF	PREDICTED: similar to splicing factor, arginine/serine-rich 10	gi|109042322,gi|109069161,gi|114052084,gi|18482474,gi|18482476,gi|197100753,gi|21758154,gi|4377849,gi|4759098,gi|51476162,gi|51701959,gi|56269656,gi|62087996,gi|73976028,gi|73976036,gi|74003542,gi|74152700,gi|9558733	32671.3	0.897	1	0.0319	ANGMELDGR	0.95	0
300mM with BAF	PREDICTED: similar to GATA zinc finger domain containing 2B isoform	gi|109016427,gi|109016430,gi|21218438,gi|21314854,gi|6330051,gi|67846054,gi|76612152	65243.7	1	3	0.0826	ALQQEQEIEQR	0.835	0
300mM with BAF	PREDICTED: similar to GATA zinc finger domain containing 2B isoform	gi|109016427,gi|109016430,gi|21218438,gi|21314854,gi|6330051,gi|67846054,gi|76612152	65243.7	1	3	0.0826	TPVVQNAASIVQPSPAHVGQQGLSK	0.95	0
300mM with BAF	PREDICTED: similar to GATA zinc finger domain containing 2B isoform	gi|109016427,gi|109016430,gi|21218438,gi|21314854,gi|6330051,gi|67846054,gi|76612152	65243.7	1	3	0.0826	VIAPNPAQLQGQR	0.95	0
300mM with BAF	PREDICTED: similar to heat shock protein 8 [Rattus norvegicus].	gi|109464859,gi|123647,gi|13242237,gi|13399491,gi|16041102,gi|24234686,gi|309319,gi|347019,gi|42542422,gi|428,gi|56403676,gi|5729877,gi|6137547,gi|6137549,gi|62896815,gi|62897129,gi|63101351,gi|6729733,gi|6729825,gi|73954621,gi|73954623,gi|74012289,gi|74012291,gi|74142813,gi|74143862,gi|74181586,gi|74184057,gi|74186087,gi|74190799,gi|74191381,gi|74198978,gi|74208631,gi|74211667,gi|74214176,gi|742…	41419.7	1	3	0.135	FDDAVVQSDMK	0.95	0
300mM with BAF	PREDICTED: similar to heat shock protein 8 [Rattus norvegicus].	gi|109464859,gi|123647,gi|13242237,gi|13399491,gi|16041102,gi|24234686,gi|309319,gi|347019,gi|42542422,gi|428,gi|56403676,gi|5729877,gi|6137547,gi|6137549,gi|62896815,gi|62897129,gi|63101351,gi|6729733,gi|6729825,gi|73954621,gi|73954623,gi|74012289,gi|74012291,gi|74142813,gi|74143862,gi|74181586,gi|74184057,gi|74186087,gi|74190799,gi|74191381,gi|74198978,gi|74208631,gi|74211667,gi|74214176,gi|742…	41419.7	1	3	0.135	NQVAMNPTNTVFDAK	0.95	0
300mM with BAF	PREDICTED: similar to heat shock protein 8 [Rattus norvegicus].	gi|109464859,gi|123647,gi|13242237,gi|13399491,gi|16041102,gi|24234686,gi|309319,gi|347019,gi|42542422,gi|428,gi|56403676,gi|5729877,gi|6137547,gi|6137549,gi|62896815,gi|62897129,gi|63101351,gi|6729733,gi|6729825,gi|73954621,gi|73954623,gi|74012289,gi|74012291,gi|74142813,gi|74143862,gi|74181586,gi|74184057,gi|74186087,gi|74190799,gi|74191381,gi|74198978,gi|74208631,gi|74211667,gi|74214176,gi|742…	41419.7	1	3	0.135	SQIHDIVLVGGSTR	0.95	0
300mM with BAF	PREDICTED: similar to heat shock protein 8 [Rattus norvegicus].	gi|109464859,gi|123647,gi|13242237,gi|13399491,gi|16041102,gi|24234686,gi|309319,gi|347019,gi|42542422,gi|428,gi|56403676,gi|5729877,gi|6137547,gi|6137549,gi|62896815,gi|62897129,gi|63101351,gi|6729733,gi|6729825,gi|73954621,gi|73954623,gi|74012289,gi|74012291,gi|74142813,gi|74143862,gi|74181586,gi|74184057,gi|74186087,gi|74190799,gi|74191381,gi|74198978,gi|74208631,gi|74211667,gi|74214176,gi|742…	41419.7	1	3	0.135	VEIIANDQGNR	0.95	gi|32451998,gi|40254806,gi|56749085,gi|193983,gi|73853769,gi|6016261,gi|47523308,gi|6729803,gi|109112233,gi|50978734,gi|14010867,gi|197101513,gi|75077423,gi|56757663,gi|197098904,gi|124339829,gi|124339826,gi|74178877,gi|47059179,gi|42543698,gi|167466173,gi|2495339,gi|386785,gi|4529892,gi|62089222,gi|16507237,gi|4529893
300mM with BAF	PREDICTED: similar to Myosin regulatory light chain 2,	gi|109121665,gi|15809016,gi|197100396,gi|2119367,gi|21326175,gi|228542,gi|5453740,gi|57089773,gi|62751407,gi|73961895,gi|74226082,gi|8393781	0	0.897	1	0	EAFNMIDQNR	0.95	0
300mM with BAF	PREDICTED: heat shock 70kDa protein 5 (glucose-regulated protein,	gi|109112233,gi|16507237,gi|197101513	72316.7	1	5	0.116	LYGSAGPPPTGEEDTAEKDEL	0.95	0
300mM with BAF	PREDICTED: heat shock 70kDa protein 5 (glucose-regulated protein,	gi|109112233,gi|16507237,gi|197101513	72316.7	1	5	0.116	NQLTSNPENTVFDAK	0.95	0
300mM with BAF	PREDICTED: heat shock 70kDa protein 5 (glucose-regulated protein,	gi|109112233,gi|16507237,gi|197101513	72316.7	1	5	0.116	SQIFSTASDNQPTVTIK	0.95	0
300mM with BAF	PREDICTED: heat shock 70kDa protein 5 (glucose-regulated protein,	gi|109112233,gi|16507237,gi|197101513	72316.7	1	5	0.116	TWNDPSVQQDIK	0.95	0
300mM with BAF	PREDICTED: heat shock 70kDa protein 5 (glucose-regulated protein,	gi|109112233,gi|16507237,gi|197101513	72316.7	1	5	0.116	VEIIANDQGNR	0.95	gi|32451998,gi|6137547,gi|74208631,gi|62897129,gi|40254806,gi|78101017,gi|73954623,gi|74191381,gi|428,gi|16041102,gi|73954621,gi|5729877,gi|56749085,gi|62896815,gi|74211667,gi|193983,gi|347019,gi|73853769,gi|6016261,gi|63101351,gi|74012289,gi|74225511,gi|47523308,gi|6729803,gi|56403676,gi|50978734,gi|14010867,gi|75077423,gi|13399491,gi|56757663,gi|197098904,gi|124339829,gi|74143862,gi|124339826,g…
300mM with BAF	breakpoint cluster region protein 1 [Homo sapiens]	gi|10120888,gi|3002951,gi|4502389	10000.3	1	7	0.719	AYVVLGQFLVLK	0.95	gi|88953904
300mM with BAF	breakpoint cluster region protein 1 [Homo sapiens]	gi|10120888,gi|3002951,gi|4502389	10000.3	1	7	0.719	DCFGCLR	0.901	0
300mM with BAF	breakpoint cluster region protein 1 [Homo sapiens]	gi|10120888,gi|3002951,gi|4502389	10000.3	1	7	0.719	DEDLFR	0.95	0
300mM with BAF	breakpoint cluster region protein 1 [Homo sapiens]	gi|10120888,gi|3002951,gi|4502389	10000.3	1	7	0.719	DFVAEPXGEKPVGSLAGIGEVLGK	0.95	0
300mM with BAF	breakpoint cluster region protein 1 [Homo sapiens]	gi|10120888,gi|3002951,gi|4502389	10000.3	1	7	0.719	EWLKDTCGANAK	0.746	0
300mM with BAF	breakpoint cluster region protein 1 [Homo sapiens]	gi|10120888,gi|3002951,gi|4502389	10000.3	1	7	0.719	HRDFVAEPXGEKPVGSLAGIGEVLGK	0.897	0
300mM with BAF	breakpoint cluster region protein 1 [Homo sapiens]	gi|10120888,gi|3002951,gi|4502389	10000.3	1	7	0.719	KDEDLFR	0.95	0
300mM with BAF	albumin.	gi|229552	0	0.897	1	0	CCTESLVNR	0.886	gi|28590,gi|74267962,gi|30794280,gi|1351907
300mM with BAF	albumin.	gi|229552	0	0.897	1	0	HLVDEPQNLIK	0.95	gi|74267962,gi|30794280,gi|1351907
300mM with BAF	albumin.	gi|229552	0	0.897	1	0	YICBBZBTISSK	0.95	0
300mM with BAF	PREDICTED: nuclear mitotic apparatus protein 1 isoform 3 [Macaca	gi|109107743,gi|109107745,gi|109107761,gi|109107763,gi|109107769,gi|109107771	0	0.999	3	0	AALMESQGQQQEER	0.69	0
300mM with BAF	PREDICTED: nuclear mitotic apparatus protein 1 isoform 3 [Macaca	gi|109107743,gi|109107745,gi|109107761,gi|109107763,gi|109107769,gi|109107771	0	0.999	3	0	ELAALRTK	0.95	0
300mM with BAF	PREDICTED: nuclear mitotic apparatus protein 1 isoform 3 [Macaca	gi|109107743,gi|109107745,gi|109107761,gi|109107763,gi|109107769,gi|109107771	0	0.999	3	0	LLQAETASNSAR	0.943	0
300mM with BAF	PREDICTED: similar to Limbin [Canis familiaris]	gi|73951860	144128	0.897	1	0.00549	LASYLSR	0.95	0
300mM with BAF	histone cluster 1, H2ae [Homo sapiens], gi|19557656|ref|NP_003504.2| histone cluster 1, H2ab [Homo sapiens], gi|30061357|ref|NP_835495.1| histone cluster 1, H2ad [Mus musculus], gi|30061361|ref|NP_835493.1| histone cluster 1, H2ag [Mus musculus], gi|30061363|ref|NP_835496.1| histone cluster 1, H2ac [Mus musculus], gi|30061365|ref|NP_835491.1| histone cluster 1, H2an [Mus musculus], gi|30061367|re…	gi|10645195,gi|10800130,gi|10800144,gi|109069903,gi|109070062,gi|109070072,gi|109095827,gi|109157563,gi|109505979,gi|109505989,gi|12025520,gi|149431856,gi|15617199,gi|157821615,gi|18105045,gi|224567,gi|24638446,gi|28316756,gi|29244126,gi|29553970,gi|30061327,gi|30061371,gi|30061379,gi|32111,gi|387182,gi|4504239,gi|4504245,gi|4504251,gi|51304,gi|57096146,gi|57106965,gi|57110393,gi|57110409,gi|5711…	13932.8	0.897	1	0.273	AGLQFPVGR	0.95	gi|6912616,gi|109066680,gi|62087582,gi|74195793,gi|4504255,gi|56238118,gi|109500010
300mM with BAF	histone cluster 1, H2ae [Homo sapiens], gi|19557656|ref|NP_003504.2| histone cluster 1, H2ab [Homo sapiens], gi|30061357|ref|NP_835495.1| histone cluster 1, H2ad [Mus musculus], gi|30061361|ref|NP_835493.1| histone cluster 1, H2ag [Mus musculus], gi|30061363|ref|NP_835496.1| histone cluster 1, H2ac [Mus musculus], gi|30061365|ref|NP_835491.1| histone cluster 1, H2an [Mus musculus], gi|30061367|re…	gi|10645195,gi|10800130,gi|10800144,gi|109069903,gi|109070062,gi|109070072,gi|109095827,gi|109157563,gi|109505979,gi|109505989,gi|12025520,gi|149431856,gi|15617199,gi|157821615,gi|18105045,gi|224567,gi|24638446,gi|28316756,gi|29244126,gi|29553970,gi|30061327,gi|30061371,gi|30061379,gi|32111,gi|387182,gi|4504239,gi|4504245,gi|4504251,gi|51304,gi|57096146,gi|57106965,gi|57110393,gi|57110409,gi|5711…	13932.8	0.897	1	0.273	HLQLAIR	0.86	gi|6912616,gi|109066680,gi|62087582,gi|74195793,gi|4504255,gi|56238118,gi|74207672,gi|109500010
300mM with BAF	histone cluster 1, H2ae [Homo sapiens], gi|19557656|ref|NP_003504.2| histone cluster 1, H2ab [Homo sapiens], gi|30061357|ref|NP_835495.1| histone cluster 1, H2ad [Mus musculus], gi|30061361|ref|NP_835493.1| histone cluster 1, H2ag [Mus musculus], gi|30061363|ref|NP_835496.1| histone cluster 1, H2ac [Mus musculus], gi|30061365|ref|NP_835491.1| histone cluster 1, H2an [Mus musculus], gi|30061367|re…	gi|10645195,gi|10800130,gi|10800144,gi|109069903,gi|109070062,gi|109070072,gi|109095827,gi|109157563,gi|109505979,gi|109505989,gi|12025520,gi|149431856,gi|15617199,gi|157821615,gi|18105045,gi|224567,gi|24638446,gi|28316756,gi|29244126,gi|29553970,gi|30061327,gi|30061371,gi|30061379,gi|32111,gi|387182,gi|4504239,gi|4504245,gi|4504251,gi|51304,gi|57096146,gi|57106965,gi|57110393,gi|57110409,gi|5711…	13932.8	0.897	1	0.273	VTIAQGGVLPNIQAVLLPK	0.95	0
300mM with BAF	Ribosomal protein L14 [Homo sapiens].	gi|12653649	23485.3	0.897	1	0.0648	GTAAAAAAAAAAAK	0.95	0
300mM with BAF	PREDICTED: similar to high mobility group AT-hook 1 isoform 2	gi|109070808,gi|14531291,gi|22208967,gi|38489996,gi|5834273,gi|70909308,gi|74146772,gi|9296984	11598.1	0.897	1	0.15	KQPPVSPGTALVGSQK	0.95	0
300mM with BAF	ATP synthase, H+ transporting, mitochondrial F0 complex, subunit F6 isoform a precursor [Homo sapiens], gi|51479137|ref|NP_001003696.1| ATP synthase, H+ transporting, mitochondrial F0 complex, subunit F6 isoform a precursor [Homo sapiens], gi|51479139|ref|NP_001003697.1| ATP synthase, H+ transporting, mitochondrial F0 complex, subunit F6 isoform a precursor [Homo sapiens], gi|51479143|ref|NP_0010…	gi|18644883,gi|42490988,gi|51479141	12569.9	0.897	1	0.176	QTSGGPVDASSEYQQELER	0.95	0
300mM with BAF	lamin B2 [Homo sapiens], gi|23503078|sp|Q03252|LMNB2_HUMAN Lamin-B2, gi|16306859|gb|AAH06551.1| Lamin B2 [Homo sapiens], gi|30583721|gb|AAP36109.1| lamin B1 [Homo sapiens], gi|61361812|gb|AAX42107.1| lamin B2 [synthetic construct], gi|190690577|gb|ACE87063.1| lamin B2 protein [synthetic construct], gi|190691939|gb|ACE87744.1| lamin B2 protein [synthetic construct] [MASS=67688]	gi|27436951,gi|73987493	67671.7	0.897	1	0.0383	KLLEGEEER	0.95	gi|27436946,gi|57014043,gi|5031877,gi|74220835
300mM with BAF	lamin B2 [Homo sapiens], gi|23503078|sp|Q03252|LMNB2_HUMAN Lamin-B2, gi|16306859|gb|AAH06551.1| Lamin B2 [Homo sapiens], gi|30583721|gb|AAP36109.1| lamin B1 [Homo sapiens], gi|61361812|gb|AAX42107.1| lamin B2 [synthetic construct], gi|190690577|gb|ACE87063.1| lamin B2 protein [synthetic construct], gi|190691939|gb|ACE87744.1| lamin B2 protein [synthetic construct] [MASS=67688]	gi|27436951,gi|73987493	67671.7	0.897	1	0.0383	TVLVNADGEEVAMR	0.95	0
300mM with BAF	chromatin assembly factor 1 subunit B [Homo sapiens], gi|3121829|sp|Q13112|CAF1B_HUMAN Chromatin assembly factor 1 subunit B (CAF-1 subunit B) (Chromatin assembly factor I p60 subunit) (CAF-I 60 kDa subunit) (CAF-Ip60) (M-phase phosphoprotein 7), gi|882260|gb|AAA76737.1| chromatin assembly factor-I p60 subunit, gi|6693627|dbj|BAA89426.1| chromatin assembly factor 1, subunit B (p60) [Homo sapiens]…	gi|4885105	61474.8	0.994	2	0.0662	TQDPSSPGTTPPQAR	0.893	0
300mM with BAF	chromatin assembly factor 1 subunit B [Homo sapiens], gi|3121829|sp|Q13112|CAF1B_HUMAN Chromatin assembly factor 1 subunit B (CAF-1 subunit B) (Chromatin assembly factor I p60 subunit) (CAF-I 60 kDa subunit) (CAF-Ip60) (M-phase phosphoprotein 7), gi|882260|gb|AAA76737.1| chromatin assembly factor-I p60 subunit, gi|6693627|dbj|BAA89426.1| chromatin assembly factor 1, subunit B (p60) [Homo sapiens]…	gi|4885105	61474.8	0.994	2	0.0662	VNDNKEPEQIAFQDEDEAQLNK	0.943	0
300mM with BAF	CHD4 protein [Homo sapiens].	gi|24047226,gi|51599156,gi|5921744	217977	1	7	0.0434	APEPTPQQVAQQQ	0.872	0
300mM with BAF	CHD4 protein [Homo sapiens].	gi|24047226,gi|51599156,gi|5921744	217977	1	7	0.0434	EEEMGEEEEVER	0.95	0
300mM with BAF	CHD4 protein [Homo sapiens].	gi|24047226,gi|51599156,gi|5921744	217977	1	7	0.0434	ERTEEPMETEPK	0.727	0
300mM with BAF	CHD4 protein [Homo sapiens].	gi|24047226,gi|51599156,gi|5921744	217977	1	7	0.0434	GGGNQVSLLNVVMDLK	0.95	0
300mM with BAF	CHD4 protein [Homo sapiens].	gi|24047226,gi|51599156,gi|5921744	217977	1	7	0.0434	GNFLEIK	0.641	0
300mM with BAF	CHD4 protein [Homo sapiens].	gi|24047226,gi|51599156,gi|5921744	217977	1	7	0.0434	SAIDLTPIVVEDKEEK	0.739	0
300mM with BAF	CHD4 protein [Homo sapiens].	gi|24047226,gi|51599156,gi|5921744	217977	1	7	0.0434	VAQYVVR	0.94	0
300mM with BAF	keratin 1 [Homo sapiens].	gi|11935049	66050.3	1	9	0.132	AEAESLYQSK	0.95	gi|109096823,gi|109096825,gi|109096827,gi|109096829
300mM with BAF	keratin 1 [Homo sapiens].	gi|11935049	66050.3	1	9	0.132	DYQELMNTK	0.897	gi|109096823,gi|109096825,gi|81891716,gi|109096827,gi|109096829
300mM with BAF	keratin 1 [Homo sapiens].	gi|11935049	66050.3	1	9	0.132	FLEQQNQVLQTK	0.95	gi|109096823,gi|109096825,gi|81891716,gi|47132620,gi|547754,gi|109096827,gi|109096829
300mM with BAF	keratin 1 [Homo sapiens].	gi|11935049	66050.3	1	9	0.132	IEISELNR	0.837	gi|109096823,gi|109096825,gi|47132620,gi|547754,gi|109096827,gi|109096829
300mM with BAF	keratin 1 [Homo sapiens].	gi|11935049	66050.3	1	9	0.132	LNDLEDALQQAK	0.95	gi|109096823,gi|109096825,gi|109096827,gi|109096829
300mM with BAF	keratin 1 [Homo sapiens].	gi|11935049	66050.3	1	9	0.132	SKAEAESLYQSK	0.95	gi|109096823,gi|109096825,gi|109096827,gi|109096829
300mM with BAF	keratin 1 [Homo sapiens].	gi|11935049	66050.3	1	9	0.132	SLDLDSIIAEVK	0.95	gi|109096823,gi|109096825,gi|109096827,gi|109096829
300mM with BAF	keratin 1 [Homo sapiens].	gi|11935049	66050.3	1	9	0.132	SLVNLGGSK	0.645	gi|109096823,gi|109096825,gi|109096827,gi|109096829
300mM with BAF	keratin 1 [Homo sapiens].	gi|11935049	66050.3	1	9	0.132	TNAENEFVTIK	0.95	gi|109096823,gi|109096825,gi|81891716,gi|109096827,gi|109096829
300mM with BAF	lamin B1 [Homo sapiens], gi|125953|sp|P20700|LMNB1_HUMAN Lamin-B1, gi|307106|gb|AAA36162.1| lamin B, gi|576840|gb|AAC37575.1| lamin B1 [Homo sapiens], gi|74354337|gb|AAI03724.1| Lamin B1 [Homo sapiens], gi|119569231|gb|EAW48846.1| lamin B1, isoform CRA_b [Homo sapiens], gi|189069155|dbj|BAG35493.1| unnamed protein product [Homo sapiens] [MASS=66408]	gi|5031877	66391.6	1	8	0.157	AEHDQLLLNYAK	0.95	0
300mM with BAF	lamin B1 [Homo sapiens], gi|125953|sp|P20700|LMNB1_HUMAN Lamin-B1, gi|307106|gb|AAA36162.1| lamin B, gi|576840|gb|AAC37575.1| lamin B1 [Homo sapiens], gi|74354337|gb|AAI03724.1| Lamin B1 [Homo sapiens], gi|119569231|gb|EAW48846.1| lamin B1, isoform CRA_b [Homo sapiens], gi|189069155|dbj|BAG35493.1| unnamed protein product [Homo sapiens] [MASS=66408]	gi|5031877	66391.6	1	8	0.157	DAALATALGDK	0.897	0
300mM with BAF	lamin B1 [Homo sapiens], gi|125953|sp|P20700|LMNB1_HUMAN Lamin-B1, gi|307106|gb|AAA36162.1| lamin B, gi|576840|gb|AAC37575.1| lamin B1 [Homo sapiens], gi|74354337|gb|AAI03724.1| Lamin B1 [Homo sapiens], gi|119569231|gb|EAW48846.1| lamin B1, isoform CRA_b [Homo sapiens], gi|189069155|dbj|BAG35493.1| unnamed protein product [Homo sapiens] [MASS=66408]	gi|5031877	66391.6	1	8	0.157	DAALATALGDKK	0.95	0
300mM with BAF	lamin B1 [Homo sapiens], gi|125953|sp|P20700|LMNB1_HUMAN Lamin-B1, gi|307106|gb|AAA36162.1| lamin B, gi|576840|gb|AAC37575.1| lamin B1 [Homo sapiens], gi|74354337|gb|AAI03724.1| Lamin B1 [Homo sapiens], gi|119569231|gb|EAW48846.1| lamin B1, isoform CRA_b [Homo sapiens], gi|189069155|dbj|BAG35493.1| unnamed protein product [Homo sapiens] [MASS=66408]	gi|5031877	66391.6	1	8	0.157	IESLSSQLSNLQK	0.95	0
300mM with BAF	lamin B1 [Homo sapiens], gi|125953|sp|P20700|LMNB1_HUMAN Lamin-B1, gi|307106|gb|AAA36162.1| lamin B, gi|576840|gb|AAC37575.1| lamin B1 [Homo sapiens], gi|74354337|gb|AAI03724.1| Lamin B1 [Homo sapiens], gi|119569231|gb|EAW48846.1| lamin B1, isoform CRA_b [Homo sapiens], gi|189069155|dbj|BAG35493.1| unnamed protein product [Homo sapiens] [MASS=66408]	gi|5031877	66391.6	1	8	0.157	KLLEGEEER	0.95	gi|27436946,gi|57014043,gi|73987493,gi|74220835,gi|27436951
300mM with BAF	lamin B1 [Homo sapiens], gi|125953|sp|P20700|LMNB1_HUMAN Lamin-B1, gi|307106|gb|AAA36162.1| lamin B, gi|576840|gb|AAC37575.1| lamin B1 [Homo sapiens], gi|74354337|gb|AAI03724.1| Lamin B1 [Homo sapiens], gi|119569231|gb|EAW48846.1| lamin B1, isoform CRA_b [Homo sapiens], gi|189069155|dbj|BAG35493.1| unnamed protein product [Homo sapiens] [MASS=66408]	gi|5031877	66391.6	1	8	0.157	LSSEMNTSTVNSAR	0.95	0
300mM with BAF	lamin B1 [Homo sapiens], gi|125953|sp|P20700|LMNB1_HUMAN Lamin-B1, gi|307106|gb|AAA36162.1| lamin B, gi|576840|gb|AAC37575.1| lamin B1 [Homo sapiens], gi|74354337|gb|AAI03724.1| Lamin B1 [Homo sapiens], gi|119569231|gb|EAW48846.1| lamin B1, isoform CRA_b [Homo sapiens], gi|189069155|dbj|BAG35493.1| unnamed protein product [Homo sapiens] [MASS=66408]	gi|5031877	66391.6	1	8	0.157	NQNSWGTGEDVK	0.924	0
300mM with BAF	lamin B1 [Homo sapiens], gi|125953|sp|P20700|LMNB1_HUMAN Lamin-B1, gi|307106|gb|AAA36162.1| lamin B, gi|576840|gb|AAC37575.1| lamin B1 [Homo sapiens], gi|74354337|gb|AAI03724.1| Lamin B1 [Homo sapiens], gi|119569231|gb|EAW48846.1| lamin B1, isoform CRA_b [Homo sapiens], gi|189069155|dbj|BAG35493.1| unnamed protein product [Homo sapiens] [MASS=66408]	gi|5031877	66391.6	1	8	0.157	QLADETLLK	0.858	0
300mM with BAF	lamin B1 [Homo sapiens], gi|125953|sp|P20700|LMNB1_HUMAN Lamin-B1, gi|307106|gb|AAA36162.1| lamin B, gi|576840|gb|AAC37575.1| lamin B1 [Homo sapiens], gi|74354337|gb|AAI03724.1| Lamin B1 [Homo sapiens], gi|119569231|gb|EAW48846.1| lamin B1, isoform CRA_b [Homo sapiens], gi|189069155|dbj|BAG35493.1| unnamed protein product [Homo sapiens] [MASS=66408]	gi|5031877	66391.6	1	8	0.157	SMYEEEINETR	0.95	0
300mM with BAF	PREDICTED: similar to metastasis-associated protein 2 [Macaca	gi|109105767,gi|115496558,gi|14141170,gi|26353100,gi|27370576,gi|4126710,gi|51491880,gi|73983819,gi|74180430	75007.1	0.991	2	0.0314	DLVAQAPLKPK	0.95	0
300mM with BAF	PREDICTED: similar to metastasis-associated protein 2 [Macaca	gi|109105767,gi|115496558,gi|14141170,gi|26353100,gi|27370576,gi|4126710,gi|51491880,gi|73983819,gi|74180430	75007.1	0.991	2	0.0314	TLLADQGEIR	0.829	0
300mM with BAF	hypothetical protein [Homo sapiens]	gi|12052742,gi|30089997,gi|4757718,gi|62897985,gi|74003163,gi|74003165	47443.1	1	3	0.0862	DDGSTLMEIDGDK	0.95	0
300mM with BAF	hypothetical protein [Homo sapiens]	gi|12052742,gi|30089997,gi|4757718,gi|62897985,gi|74003163,gi|74003165	47443.1	1	3	0.0862	LIANNTTVER	0.95	0
300mM with BAF	hypothetical protein [Homo sapiens]	gi|12052742,gi|30089997,gi|4757718,gi|62897985,gi|74003163,gi|74003165	47443.1	1	3	0.0862	QGGPTYYIDTNALR	0.95	0
300mM with BAF	Probable global transcription activator SNF2L2 (ATP-dependent helicase SMARCA2) (SNF2-alpha) (SWI/SNF-related matrix-associated actin-dependent regulator of chromatin subfamily A member 2) (hBRM), gi|414117|emb|CAA51407.1| HBRM [Homo sapiens] [MASS=180762]	gi|1711406,gi|33440456,gi|48255898,gi|48255900,gi|49523317,gi|51593084,gi|73946611,gi|73946621,gi|73946625,gi|73946627,gi|73946629,gi|73946631,gi|73946633,gi|73946635,gi|73946637,gi|73946639,gi|73946641,gi|73946643,gi|73946645,gi|73946647,gi|73946649,gi|73946651,gi|73946653,gi|73946655,gi|73946657,gi|73946659,gi|73946661,gi|73946663,gi|73946665,gi|73946667,gi|73946669,gi|73946671,gi|73946673,gi|7…	179320	0.897	1	0.00827	ILLDPNSEEVSEK	0.95	0
300mM with BAF	epidermal keratin subunit II	gi|293686	0	0.897	1	0	FASFIDK	0.757	gi|109096781,gi|18999435,gi|109096797,gi|81891716,gi|47132620,gi|109096795,gi|109096789,gi|547754,gi|109096793
300mM with BAF	epidermal keratin subunit II	gi|293686	0	0.897	1	0	TDAENEFVTLK	0.95	0
300mM with BAF	PREDICTED: thymopoietin isoform 2 [Macaca mulatta].	gi|109098344	75457.9	1	4	0.082	SELVANNVTLPAGEQR	0.95	0
300mM with BAF	PREDICTED: thymopoietin isoform 2 [Macaca mulatta].	gi|109098344	75457.9	1	4	0.082	SHISDQSPLSSK	0.649	0
300mM with BAF	PREDICTED: thymopoietin isoform 2 [Macaca mulatta].	gi|109098344	75457.9	1	4	0.082	SSTPLPTISSSAENTR	0.95	0
300mM with BAF	PREDICTED: thymopoietin isoform 2 [Macaca mulatta].	gi|109098344	75457.9	1	4	0.082	YGVNPGPIVGTTR	0.95	0
300mM with BAF	PREDICTED: similar to SWI/SNF-related matrix-associated	gi|109097106,gi|109480098,gi|109480100,gi|109480102,gi|109481429,gi|15341763,gi|1549241,gi|166235123,gi|166235125,gi|21237805,gi|21237808,gi|37718972,gi|55727092,gi|62087592,gi|62088166,gi|73968351	132862	0.92	2	0.0132	NFMIDTYR	0.536	0
300mM with BAF	PREDICTED: similar to SWI/SNF-related matrix-associated	gi|109097106,gi|109480098,gi|109480100,gi|109480102,gi|109481429,gi|15341763,gi|1549241,gi|166235123,gi|166235125,gi|21237805,gi|21237808,gi|37718972,gi|55727092,gi|62087592,gi|62088166,gi|73968351	132862	0.92	2	0.0132	YDFQNPSR	0.829	0
300mM with BAF	transcriptional regulator homolog RPD3 [Homo sapiens].	gi|1667394,gi|3023934,gi|62666128,gi|68068066,gi|71051977,gi|73974025,gi|87162464	55285.5	1	3	0.0881	LHISPSNMTNQNTPEYMEK	0.95	0
300mM with BAF	transcriptional regulator homolog RPD3 [Homo sapiens].	gi|1667394,gi|3023934,gi|62666128,gi|68068066,gi|71051977,gi|73974025,gi|87162464	55285.5	1	3	0.0881	SIRPDNMSEYSK	0.801	gi|13128860,gi|70794768,gi|1665723,gi|109001148,gi|2347180,gi|6680193,gi|73949981,gi|82697313,gi|56203669,gi|62655265,gi|73949989
300mM with BAF	transcriptional regulator homolog RPD3 [Homo sapiens].	gi|1667394,gi|3023934,gi|62666128,gi|68068066,gi|71051977,gi|73974025,gi|87162464	55285.5	1	3	0.0881	YGEYFPGTGDLR	0.95	gi|13128860,gi|70794768,gi|1665723,gi|109001148,gi|2347180,gi|6680193,gi|73949981,gi|82697313,gi|56203669,gi|62655265,gi|73949989
300mM with BAF	PREDICTED: similar to eukaryotic translation elongation factor 1	gi|109071712,gi|109071714,gi|109071716,gi|109107440,gi|109107442,gi|197102737,gi|4503471,gi|48734733,gi|48734966,gi|55824554,gi|56403849,gi|62896589,gi|62896605,gi|62896661,gi|62897525,gi|62897621,gi|62897653,gi|73994092,gi|74001312,gi|74746925	50123.2	1	3	0.106	DGNASGTTLLEALDCILPPTRPTDKPLR	0.95	0
300mM with BAF	PREDICTED: similar to eukaryotic translation elongation factor 1	gi|109071712,gi|109071714,gi|109071716,gi|109107440,gi|109107442,gi|197102737,gi|4503471,gi|48734733,gi|48734966,gi|55824554,gi|56403849,gi|62896589,gi|62896605,gi|62896661,gi|62897525,gi|62897621,gi|62897653,gi|73994092,gi|74001312,gi|74746925	50123.2	1	3	0.106	IGGIGTVPVGR	0.95	0
300mM with BAF	PREDICTED: similar to eukaryotic translation elongation factor 1	gi|109071712,gi|109071714,gi|109071716,gi|109107440,gi|109107442,gi|197102737,gi|4503471,gi|48734733,gi|48734966,gi|55824554,gi|56403849,gi|62896589,gi|62896605,gi|62896661,gi|62897525,gi|62897621,gi|62897653,gi|73994092,gi|74001312,gi|74746925	50123.2	1	3	0.106	STTTGHLIYK	0.938	0
300mM with BAF	PREDICTED: pyruvate kinase 3 isoform 9 [Macaca mulatta].	gi|109081748,gi|109081750,gi|109157779,gi|109518934,gi|109518936,gi|1405933,gi|15987970,gi|15987978,gi|16757994,gi|189998,gi|197101195,gi|206205,gi|2623945,gi|2851533,gi|31416989,gi|31981562,gi|33286418,gi|33286420,gi|35505,gi|3659945,gi|38181543,gi|551295,gi|55732958,gi|62662888,gi|62665891,gi|62897413,gi|67464392,gi|73535278,gi|73587283,gi|73916936,gi|74000677,gi|74151988,gi|74196318,gi|7421281…	57899.3	1	3	0.0604	GDYPLEAVR	0.95	0
300mM with BAF	PREDICTED: pyruvate kinase 3 isoform 9 [Macaca mulatta].	gi|109081748,gi|109081750,gi|109157779,gi|109518934,gi|109518936,gi|1405933,gi|15987970,gi|15987978,gi|16757994,gi|189998,gi|197101195,gi|206205,gi|2623945,gi|2851533,gi|31416989,gi|31981562,gi|33286418,gi|33286420,gi|35505,gi|3659945,gi|38181543,gi|551295,gi|55732958,gi|62662888,gi|62665891,gi|62897413,gi|67464392,gi|73535278,gi|73587283,gi|73916936,gi|74000677,gi|74151988,gi|74196318,gi|7421281…	57899.3	1	3	0.0604	GSGTAEVELK	0.95	0
300mM with BAF	PREDICTED: pyruvate kinase 3 isoform 9 [Macaca mulatta].	gi|109081748,gi|109081750,gi|109157779,gi|109518934,gi|109518936,gi|1405933,gi|15987970,gi|15987978,gi|16757994,gi|189998,gi|197101195,gi|206205,gi|2623945,gi|2851533,gi|31416989,gi|31981562,gi|33286418,gi|33286420,gi|35505,gi|3659945,gi|38181543,gi|551295,gi|55732958,gi|62662888,gi|62665891,gi|62897413,gi|67464392,gi|73535278,gi|73587283,gi|73916936,gi|74000677,gi|74151988,gi|74196318,gi|7421281…	57899.3	1	3	0.0604	NTGIICTIGPASR	0.95	0
300mM with BAF	PREDICTED: similar to Myosin light polypeptide 6 (Smooth muscle and	gi|109067280,gi|109097255,gi|109097259,gi|109097265,gi|155369650,gi|17986258,gi|33620739,gi|435585,gi|467828,gi|73968363,gi|94363353	16942.8	0.897	1	0.0861	ALGQNPTNAEVLK	0.95	0
300mM with BAF	PREDICTED: hypothetical protein [Rattus norvegicus].	gi|109504651,gi|109505459,gi|197099494,gi|21754036,gi|40255111	16707.2	0.897	1	0.0903	AADQFDIYSSQQSK	0.95	0
300mM with BAF	euchromatic histone-lysine N-methyltransferase 2 isoform a [Homo sapiens], gi|116241348|sp|Q96KQ7.3|EHMT2_HUMAN Histone-lysine N-methyltransferase, H3 lysine-9 specific 3 (Histone H3-K9 methyltransferase 3) (H3-K9-HMTase 3) (Euchromatic histone-lysine N-methyltransferase 2) (HLA-B-associated transcript 8) (Protein G9a) (Lysine N-methyltransferase 1C), gi|55961807|emb|CAI17748.1| euchromatic histo…	gi|156142197,gi|156142199,gi|15917538,gi|4529889,gi|46255679,gi|478844,gi|48257161,gi|48257231,gi|62088446	111500	0.897	1	0.015	LNSGGGLSEELGSAR	0.95	0
300mM with BAF	PREDICTED: similar to Activated RNA polymerase II transcriptional	gi|109076878,gi|109103057,gi|197098442,gi|19923784,gi|205854,gi|50262342,gi|57526804,gi|62088150,gi|6755364,gi|73954359,gi|73963571,gi|74226891	14377.9	0.897	1	0.0709	DDNMFQIGK	0.95	0
300mM with BAF	PREDICTED: CD2 antigen (cytoplasmic tail) binding protein 2 isoform	gi|109128201,gi|109128203,gi|109128207,gi|197098480,gi|5174409,gi|55730034	37629.2	0.897	1	0.0411	LVDPVAGSGGPGSR	0.95	0
300mM with BAF	probable transcription factor requiem - mouse.	gi|1083466,gi|13938144,gi|197098008,gi|5454004,gi|6648956,gi|6755314,gi|73983122,gi|73983124,gi|74219112	42045.2	0.897	1	0.0243	LDASILEDR	0.95	0
300mM with BAF	glycodelin [Macaca mulatta].	gi|74136411	20798.8	0.897	1	0.0389	QNLELPK	0.95	0
300mM with BAF	PREDICTED: filamin 1 (actin-binding protein-280) isoform 4 [Macaca	gi|109132798,gi|109132800,gi|109132802,gi|109132804,gi|109132806,gi|116063573,gi|160420317,gi|21748542,gi|28243,gi|53791219,gi|53791221,gi|57284166,gi|74008809,gi|74008811,gi|74008813,gi|74008815,gi|74008817,gi|74008819,gi|74008821,gi|74008823,gi|74008825,gi|74008827,gi|74008829	0	1	3	0	ANLPQSFQVDTSK	0.95	0
300mM with BAF	PREDICTED: filamin 1 (actin-binding protein-280) isoform 4 [Macaca	gi|109132798,gi|109132800,gi|109132802,gi|109132804,gi|109132806,gi|116063573,gi|160420317,gi|21748542,gi|28243,gi|53791219,gi|53791221,gi|57284166,gi|74008809,gi|74008811,gi|74008813,gi|74008815,gi|74008817,gi|74008819,gi|74008821,gi|74008823,gi|74008825,gi|74008827,gi|74008829	0	1	3	0	AWGPGLEGGVVGK	0.826	0
300mM with BAF	PREDICTED: filamin 1 (actin-binding protein-280) isoform 4 [Macaca	gi|109132798,gi|109132800,gi|109132802,gi|109132804,gi|109132806,gi|116063573,gi|160420317,gi|21748542,gi|28243,gi|53791219,gi|53791221,gi|57284166,gi|74008809,gi|74008811,gi|74008813,gi|74008815,gi|74008817,gi|74008819,gi|74008821,gi|74008823,gi|74008825,gi|74008827,gi|74008829	0	1	3	0	GAGTGGLGLAVEGPSEAK	0.95	0
300mM with BAF	RNA binding motif protein, X chromosome retrogene-like [Rattus	gi|157823451,gi|21755396,gi|3256007,gi|542850,gi|56699409,gi|6755296,gi|67969238,gi|71043834,gi|83699420	42145.7	0.897	1	0.0335	VEQATKPSFESGR	0.95	0
300mM with BAF	PREDICTED: similar to barrier-to-autointegration factor [Homo	gi|88953904	9722.4	0.897	1	0.523	AYVVLGQFLVLK	0.95	gi|4502389,gi|10120888,gi|3002951
300mM with BAF	PREDICTED: similar to barrier-to-autointegration factor [Homo	gi|88953904	9722.4	0.897	1	0.523	DFVAEPMGEKPVGSLAGIGEVLGK	0.95	gi|4502389,gi|10120888,gi|3002951
300mM with BAF	PREDICTED: similar to barrier-to-autointegration factor [Homo	gi|88953904	9722.4	0.897	1	0.523	HRDFVAEPMGEKPVGSLAGIGEVLGK	0.95	gi|4502389,gi|10120888,gi|3002951
300mM with BAF	PREDICTED: similar to barrier-to-autointegration factor [Homo	gi|88953904	9722.4	0.897	1	0.523	KDEDLYR	0.95	0
300mM with BAF	PREDICTED: similar to chromobox homolog 3 [Macaca mulatta].	gi|109067205,gi|109100925,gi|15082258,gi|21903394,gi|53165,gi|73976140,gi|73976142,gi|7416937,gi|80474659,gi|82913885	20794	1	4	0.23	IIGATDSSGELMFLMK	0.944	gi|109491751,gi|48249223,gi|5803076,gi|109488886
300mM with BAF	PREDICTED: similar to chromobox homolog 3 [Macaca mulatta].	gi|109067205,gi|109100925,gi|15082258,gi|21903394,gi|53165,gi|73976140,gi|73976142,gi|7416937,gi|80474659,gi|82913885	20794	1	4	0.23	KVEEAEPEEFVVEK	0.95	0
300mM with BAF	PREDICTED: similar to chromobox homolog 3 [Macaca mulatta].	gi|109067205,gi|109100925,gi|15082258,gi|21903394,gi|53165,gi|73976140,gi|73976142,gi|7416937,gi|80474659,gi|82913885	20794	1	4	0.23	LTWHSCPEDEAQ	0.95	0
300mM with BAF	PREDICTED: similar to chromobox homolog 3 [Macaca mulatta].	gi|109067205,gi|109100925,gi|15082258,gi|21903394,gi|53165,gi|73976140,gi|73976142,gi|7416937,gi|80474659,gi|82913885	20794	1	4	0.23	VEEAEPEEFVVEK	0.694	0
300mM with BAF	H2A histone family, member Y isoform 1 [Homo sapiens].	gi|20336746,gi|32492946,gi|3493529,gi|4758496,gi|63100748,gi|73971330,gi|93141018	39472.7	1	4	0.143	AASADSTTEGTPADGFTVLSTK	0.95	0
300mM with BAF	H2A histone family, member Y isoform 1 [Homo sapiens].	gi|20336746,gi|32492946,gi|3493529,gi|4758496,gi|63100748,gi|73971330,gi|93141018	39472.7	1	4	0.143	AGVIFPVGR	0.74	0
300mM with BAF	H2A histone family, member Y isoform 1 [Homo sapiens].	gi|20336746,gi|32492946,gi|3493529,gi|4758496,gi|63100748,gi|73971330,gi|93141018	39472.7	1	4	0.143	GKLEAIITPPPAK	0.95	0
300mM with BAF	H2A histone family, member Y isoform 1 [Homo sapiens].	gi|20336746,gi|32492946,gi|3493529,gi|4758496,gi|63100748,gi|73971330,gi|93141018	39472.7	1	4	0.143	QTAAQLILK	0.603	0
300mM with BAF	B-cell CLL/lymphoma 7 protein family member C, gi|2832832|emb|CAA11754.1| BCL7C [Homo sapiens] [MASS=23365]	gi|108935957,gi|20336477,gi|33874822,gi|37589042,gi|57087815,gi|73958343	23346.9	0.897	1	0.0829	DPGGITAGSTDEPPMLTK	0.95	0
300mM with BAF	damage-specific DNA binding protein 2 [Homo sapiens], gi|114637452|ref|XP_001167838.1| PREDICTED: damage-specific DNA binding protein 2 (48kD) isoform 4 [Pan troglodytes], gi|12230033|sp|Q92466|DDB2_HUMAN DNA damage-binding protein 2 (Damage-specific DNA-binding protein 2) (DDB p48 subunit) (DDBb) (UV-damaged DNA-binding protein 2) (UV-DDB 2), gi|1536966|gb|AAB07897.1| DDBb p48, gi|12652689|gb|AA…	gi|4557515	47847	1	9	0.255	ASFLYSLPHR	0.95	0
300mM with BAF	damage-specific DNA binding protein 2 [Homo sapiens], gi|114637452|ref|XP_001167838.1| PREDICTED: damage-specific DNA binding protein 2 (48kD) isoform 4 [Pan troglodytes], gi|12230033|sp|Q92466|DDB2_HUMAN DNA damage-binding protein 2 (Damage-specific DNA-binding protein 2) (DDB p48 subunit) (DDBb) (UV-damaged DNA-binding protein 2) (UV-DDB 2), gi|1536966|gb|AAB07897.1| DDBb p48, gi|12652689|gb|AA…	gi|4557515	47847	1	9	0.255	ATSLAWHPTHPSTVAVGSK	0.95	0
300mM with BAF	damage-specific DNA binding protein 2 [Homo sapiens], gi|114637452|ref|XP_001167838.1| PREDICTED: damage-specific DNA binding protein 2 (48kD) isoform 4 [Pan troglodytes], gi|12230033|sp|Q92466|DDB2_HUMAN DNA damage-binding protein 2 (Damage-specific DNA-binding protein 2) (DDB p48 subunit) (DDBb) (UV-damaged DNA-binding protein 2) (UV-DDB 2), gi|1536966|gb|AAB07897.1| DDBb p48, gi|12652689|gb|AA…	gi|4557515	47847	1	9	0.255	FNPLNTNQFYASSMEGTTR	0.895	0
300mM with BAF	damage-specific DNA binding protein 2 [Homo sapiens], gi|114637452|ref|XP_001167838.1| PREDICTED: damage-specific DNA binding protein 2 (48kD) isoform 4 [Pan troglodytes], gi|12230033|sp|Q92466|DDB2_HUMAN DNA damage-binding protein 2 (Damage-specific DNA-binding protein 2) (DDB p48 subunit) (DDBb) (UV-damaged DNA-binding protein 2) (UV-DDB 2), gi|1536966|gb|AAB07897.1| DDBb p48, gi|12652689|gb|AA…	gi|4557515	47847	1	9	0.255	GGDIMLWNFGIK	0.95	0
300mM with BAF	damage-specific DNA binding protein 2 [Homo sapiens], gi|114637452|ref|XP_001167838.1| PREDICTED: damage-specific DNA binding protein 2 (48kD) isoform 4 [Pan troglodytes], gi|12230033|sp|Q92466|DDB2_HUMAN DNA damage-binding protein 2 (Damage-specific DNA-binding protein 2) (DDB p48 subunit) (DDBb) (UV-damaged DNA-binding protein 2) (UV-DDB 2), gi|1536966|gb|AAB07897.1| DDBb p48, gi|12652689|gb|AA…	gi|4557515	47847	1	9	0.255	GIGAGGSITGLK	0.95	0
300mM with BAF	damage-specific DNA binding protein 2 [Homo sapiens], gi|114637452|ref|XP_001167838.1| PREDICTED: damage-specific DNA binding protein 2 (48kD) isoform 4 [Pan troglodytes], gi|12230033|sp|Q92466|DDB2_HUMAN DNA damage-binding protein 2 (Damage-specific DNA-binding protein 2) (DDB p48 subunit) (DDBb) (UV-damaged DNA-binding protein 2) (UV-DDB 2), gi|1536966|gb|AAB07897.1| DDBb p48, gi|12652689|gb|AA…	gi|4557515	47847	1	9	0.255	SCTPYELR	0.681	0
300mM with BAF	damage-specific DNA binding protein 2 [Homo sapiens], gi|114637452|ref|XP_001167838.1| PREDICTED: damage-specific DNA binding protein 2 (48kD) isoform 4 [Pan troglodytes], gi|12230033|sp|Q92466|DDB2_HUMAN DNA damage-binding protein 2 (Damage-specific DNA-binding protein 2) (DDB p48 subunit) (DDBb) (UV-damaged DNA-binding protein 2) (UV-DDB 2), gi|1536966|gb|AAB07897.1| DDBb p48, gi|12652689|gb|AA…	gi|4557515	47847	1	9	0.255	SPLELEPEAK	0.935	0
300mM with BAF	damage-specific DNA binding protein 2 [Homo sapiens], gi|114637452|ref|XP_001167838.1| PREDICTED: damage-specific DNA binding protein 2 (48kD) isoform 4 [Pan troglodytes], gi|12230033|sp|Q92466|DDB2_HUMAN DNA damage-binding protein 2 (Damage-specific DNA-binding protein 2) (DDB p48 subunit) (DDBb) (UV-damaged DNA-binding protein 2) (UV-DDB 2), gi|1536966|gb|AAB07897.1| DDBb p48, gi|12652689|gb|AA…	gi|4557515	47847	1	9	0.255	TIDVFDGNSGK	0.95	0
300mM with BAF	damage-specific DNA binding protein 2 [Homo sapiens], gi|114637452|ref|XP_001167838.1| PREDICTED: damage-specific DNA binding protein 2 (48kD) isoform 4 [Pan troglodytes], gi|12230033|sp|Q92466|DDB2_HUMAN DNA damage-binding protein 2 (Damage-specific DNA-binding protein 2) (DDB p48 subunit) (DDBb) (UV-damaged DNA-binding protein 2) (UV-DDB 2), gi|1536966|gb|AAB07897.1| DDBb p48, gi|12652689|gb|AA…	gi|4557515	47847	1	9	0.255	YNLIVVGR	0.95	0
300mM with BAF	PREDICTED: similar to nuclease sensitive element binding protein 1	gi|109003367,gi|109475401,gi|109490740,gi|181486,gi|199821,gi|203398,gi|203999,gi|2745892,gi|27807361,gi|29437175,gi|38142418,gi|55451,gi|73909033,gi|73950968,gi|73950974,gi|74007889,gi|92373398,gi|9653686,gi|988283	35711.5	0.991	2	0.13	EDGNEEDKENQGDETQGQQPPQR	0.826	0
300mM with BAF	PREDICTED: similar to nuclease sensitive element binding protein 1	gi|109003367,gi|109475401,gi|109490740,gi|181486,gi|199821,gi|203398,gi|203999,gi|2745892,gi|27807361,gi|29437175,gi|38142418,gi|55451,gi|73909033,gi|73950968,gi|73950974,gi|74007889,gi|92373398,gi|9653686,gi|988283	35711.5	0.991	2	0.13	GAEAANVTGPGGVPVQGSK	0.95	0
300mM with BAF	PREDICTED: similar to Actin, cytoplasmic 2 (Gamma-actin) [Rattus	gi|109492380,gi|1351867,gi|14250401,gi|15277503,gi|16924319,gi|197099682,gi|2318133,gi|28336,gi|4501885,gi|4501887,gi|45269029,gi|47116231,gi|60389477,gi|62897409,gi|62897625,gi|62897671,gi|66735458,gi|67971314,gi|73958059,gi|73958065,gi|73958067,gi|73964667,gi|74151948,gi|74187644,gi|74190672,gi|74191399,gi|74191564,gi|74191566,gi|74213524,gi|809561	41719.8	0.999	3	0.104	AGFAGDDAPR	0.909	gi|74178273
300mM with BAF	PREDICTED: similar to Actin, cytoplasmic 2 (Gamma-actin) [Rattus	gi|109492380,gi|1351867,gi|14250401,gi|15277503,gi|16924319,gi|197099682,gi|2318133,gi|28336,gi|4501885,gi|4501887,gi|45269029,gi|47116231,gi|60389477,gi|62897409,gi|62897625,gi|62897671,gi|66735458,gi|67971314,gi|73958059,gi|73958065,gi|73958067,gi|73964667,gi|74151948,gi|74187644,gi|74190672,gi|74191399,gi|74191564,gi|74191566,gi|74213524,gi|809561	41719.8	0.999	3	0.104	AVFPSIVGRPR	0.864	gi|74178273
300mM with BAF	PREDICTED: similar to Actin, cytoplasmic 2 (Gamma-actin) [Rattus	gi|109492380,gi|1351867,gi|14250401,gi|15277503,gi|16924319,gi|197099682,gi|2318133,gi|28336,gi|4501885,gi|4501887,gi|45269029,gi|47116231,gi|60389477,gi|62897409,gi|62897625,gi|62897671,gi|66735458,gi|67971314,gi|73958059,gi|73958065,gi|73958067,gi|73964667,gi|74151948,gi|74187644,gi|74190672,gi|74191399,gi|74191564,gi|74191566,gi|74213524,gi|809561	41719.8	0.999	3	0.104	VAPEEHPVLLTEAPLNPK	0.95	gi|2724046
300mM with BAF	PREDICTED: similar to Chromobox protein homolog 5 (Heterochromatin	gi|109096963,gi|62721107,gi|6912292,gi|886063	22207.6	1	6	0.361	DTDEADLVLAK	0.562	0
300mM with BAF	PREDICTED: similar to Chromobox protein homolog 5 (Heterochromatin	gi|109096963,gi|62721107,gi|6912292,gi|886063	22207.6	1	6	0.361	GFSEEHNTWEPEK	0.95	0
300mM with BAF	PREDICTED: similar to Chromobox protein homolog 5 (Heterochromatin	gi|109096963,gi|62721107,gi|6912292,gi|886063	22207.6	1	6	0.361	GQVEYLLK	0.894	gi|5803076,gi|109491751,gi|109488886,gi|48249223
300mM with BAF	PREDICTED: similar to Chromobox protein homolog 5 (Heterochromatin	gi|109096963,gi|62721107,gi|6912292,gi|886063	22207.6	1	6	0.361	LTWHAYPEDAENK	0.95	0
300mM with BAF	PREDICTED: similar to Chromobox protein homolog 5 (Heterochromatin	gi|109096963,gi|62721107,gi|6912292,gi|886063	22207.6	1	6	0.361	NLDCPELISEFMK	0.875	0
300mM with BAF	PREDICTED: similar to Chromobox protein homolog 5 (Heterochromatin	gi|109096963,gi|62721107,gi|6912292,gi|886063	22207.6	1	6	0.361	SNFSNSADDIK	0.95	0
300mM with BAF	Keratin 14 (epidermolysis bullosa simplex, Dowling-Meara, Koebner) [Homo sapiens]	gi|12803709,gi|15431310,gi|386848	51634.6	0.897	1	0.0275	EVATNSELVQSGK	0.95	gi|21754583,gi|4557701
300mM with BAF	PREDICTED: similar to nucleolin [Macaca mulatta].	gi|109101818,gi|189306,gi|197098386,gi|21750187,gi|34534595,gi|55956788,gi|75075722	76597.9	1	10	0.177	EAMEDGEIDGNK	0.95	0
300mM with BAF	PREDICTED: similar to nucleolin [Macaca mulatta].	gi|109101818,gi|189306,gi|197098386,gi|21750187,gi|34534595,gi|55956788,gi|75075722	76597.9	1	10	0.177	GLSEDTTEETLK	0.915	0
300mM with BAF	PREDICTED: similar to nucleolin [Macaca mulatta].	gi|109101818,gi|189306,gi|197098386,gi|21750187,gi|34534595,gi|55956788,gi|75075722	76597.9	1	10	0.177	KFGYVDFESAEDLEK	0.553	0
300mM with BAF	PREDICTED: similar to nucleolin [Macaca mulatta].	gi|109101818,gi|189306,gi|197098386,gi|21750187,gi|34534595,gi|55956788,gi|75075722	76597.9	1	10	0.177	LELQGPR	0.95	0
300mM with BAF	PREDICTED: similar to nucleolin [Macaca mulatta].	gi|109101818,gi|189306,gi|197098386,gi|21750187,gi|34534595,gi|55956788,gi|75075722	76597.9	1	10	0.177	NDLAVVDVR	0.95	0
300mM with BAF	PREDICTED: similar to nucleolin [Macaca mulatta].	gi|109101818,gi|189306,gi|197098386,gi|21750187,gi|34534595,gi|55956788,gi|75075722	76597.9	1	10	0.177	SISLYYTGEK	0.95	0
300mM with BAF	PREDICTED: similar to nucleolin [Macaca mulatta].	gi|109101818,gi|189306,gi|197098386,gi|21750187,gi|34534595,gi|55956788,gi|75075722	76597.9	1	10	0.177	TGISDVFAK	0.95	0
300mM with BAF	PREDICTED: similar to nucleolin [Macaca mulatta].	gi|109101818,gi|189306,gi|197098386,gi|21750187,gi|34534595,gi|55956788,gi|75075722	76597.9	1	10	0.177	TLVLSNLSYSATEETLQEVFEK	0.95	0
300mM with BAF	PREDICTED: similar to nucleolin [Macaca mulatta].	gi|109101818,gi|189306,gi|197098386,gi|21750187,gi|34534595,gi|55956788,gi|75075722	76597.9	1	10	0.177	VEGTEPTTAFNLFVGNLNFNK	0.95	0
300mM with BAF	PREDICTED: similar to nucleolin [Macaca mulatta].	gi|109101818,gi|189306,gi|197098386,gi|21750187,gi|34534595,gi|55956788,gi|75075722	76597.9	1	10	0.177	VTLDWAKPK	0.95	0
300mM with BAF	PREDICTED: similar to PC4 and SFRS1 interacting protein 1 isoform 2 [Macaca mulatta]	gi|109111495,gi|190014586,gi|1945445,gi|19923653,gi|39794213,gi|4050034,gi|4050036,gi|71052048	60085.9	0.897	1	0.0283	QPCPSESDIITEEDK	0.95	0
300mM with BAF	heat shock 70kDa protein 1B [Mus musculus]	gi|124339826,gi|124339829,gi|14010867,gi|167466173,gi|193983,gi|197098904,gi|2495339,gi|32451998,gi|386785,gi|40254806,gi|42543698,gi|4529892,gi|4529893,gi|47059179,gi|47523308,gi|50978734,gi|56749085,gi|56757663,gi|6016261,gi|62089222,gi|6729803,gi|73853769,gi|74178877,gi|75077423	70212.2	0.897	1	0.0406	NQVALNPQNTVFDAK	0.95	0
300mM with BAF	heat shock 70kDa protein 1B [Mus musculus]	gi|124339826,gi|124339829,gi|14010867,gi|167466173,gi|193983,gi|197098904,gi|2495339,gi|32451998,gi|386785,gi|40254806,gi|42543698,gi|4529892,gi|4529893,gi|47059179,gi|47523308,gi|50978734,gi|56749085,gi|56757663,gi|6016261,gi|62089222,gi|6729803,gi|73853769,gi|74178877,gi|75077423	70212.2	0.897	1	0.0406	VEIIANDQGNR	0.95	gi|6137547,gi|74208631,gi|62897129,gi|78101017,gi|73954623,gi|74191381,gi|428,gi|16041102,gi|73954621,gi|5729877,gi|62896815,gi|74211667,gi|347019,gi|63101351,gi|74012289,gi|74225511,gi|56403676,gi|109112233,gi|197101513,gi|13399491,gi|74143862,gi|74214176,gi|123647,gi|6137549,gi|74181586,gi|109464859,gi|74186087,gi|74012291,gi|42542422,gi|74198978,gi|74190799,gi|6729733,gi|76253709,gi|74220416,g…
300mM with BAF	PREDICTED: similar to germinal histone H4 gene [Rattus norvegicus].	gi|109504921,gi|12847763,gi|27573730,gi|4504301,gi|57098917,gi|57106967,gi|74004178,gi|74004206,gi|74004215,gi|74004228,gi|74004246,gi|74004256,gi|76631717,gi|94378251	11349.7	1	4	0.359	DNIQGITKPAIR	0.95	0
300mM with BAF	PREDICTED: similar to germinal histone H4 gene [Rattus norvegicus].	gi|109504921,gi|12847763,gi|27573730,gi|4504301,gi|57098917,gi|57106967,gi|74004178,gi|74004206,gi|74004215,gi|74004228,gi|74004246,gi|74004256,gi|76631717,gi|94378251	11349.7	1	4	0.359	ISGLIYEETR	0.95	gi|223582
300mM with BAF	PREDICTED: similar to germinal histone H4 gene [Rattus norvegicus].	gi|109504921,gi|12847763,gi|27573730,gi|4504301,gi|57098917,gi|57106967,gi|74004178,gi|74004206,gi|74004215,gi|74004228,gi|74004246,gi|74004256,gi|76631717,gi|94378251	11349.7	1	4	0.359	TLYGFGG	0.848	gi|223582
300mM with BAF	PREDICTED: similar to germinal histone H4 gene [Rattus norvegicus].	gi|109504921,gi|12847763,gi|27573730,gi|4504301,gi|57098917,gi|57106967,gi|74004178,gi|74004206,gi|74004215,gi|74004228,gi|74004246,gi|74004256,gi|76631717,gi|94378251	11349.7	1	4	0.359	VFLENVIR	0.95	gi|223582
300mM with BAF	tektin 1 [Bos taurus].	gi|115495195	48702.2	0.897	1	0.0167	LALHLDK	0.95	0
300mM with BAF	Chain A, Trypsin In Complex With Borate.	gi|110590762,gi|136429,gi|2914482	23457.3	1	5	0.323	IITHPNFNGNTLDNDIMLIK	0.95	0
300mM with BAF	Chain A, Trypsin In Complex With Borate.	gi|110590762,gi|136429,gi|2914482	23457.3	1	5	0.323	LGEHNIDVLEGNEQFINAAK	0.95	0
300mM with BAF	Chain A, Trypsin In Complex With Borate.	gi|110590762,gi|136429,gi|2914482	23457.3	1	5	0.323	LSSPATLNSR	0.95	0
300mM with BAF	Chain A, Trypsin In Complex With Borate.	gi|110590762,gi|136429,gi|2914482	23457.3	1	5	0.323	SSGSSYPSLLQCLK	0.95	0
300mM with BAF	Chain A, Trypsin In Complex With Borate.	gi|110590762,gi|136429,gi|2914482	23457.3	1	5	0.323	VATVSLPR	0.95	0
300mM with BAF	PREDICTED: similar to H2A histone family, member V isoform 1	gi|109066680,gi|109500010,gi|4504255,gi|56238118,gi|62087582,gi|6912616,gi|74195793	13535.2	1	3	0.234	AGLQFPVGR	0.95	gi|224567,gi|10800130,gi|109070062,gi|57110393,gi|4504239,gi|109157563,gi|12025520,gi|57110495,gi|57110409,gi|30061327,gi|29244126,gi|74004170,gi|30061371,gi|18105045,gi|57096146,gi|74004189,gi|29553970,gi|57106965,gi|109095827,gi|4504245,gi|817939,gi|24638446,gi|10800144,gi|51304,gi|81884124,gi|28316756,gi|57110427,gi|157821615,gi|4504251,gi|10645195,gi|66730355,gi|73981533,gi|74003986,gi|300613…
300mM with BAF	PREDICTED: similar to H2A histone family, member V isoform 1	gi|109066680,gi|109500010,gi|4504255,gi|56238118,gi|62087582,gi|6912616,gi|74195793	13535.2	1	3	0.234	ATIAGGGVIPHIHK	0.95	gi|74207672
300mM with BAF	PREDICTED: similar to H2A histone family, member V isoform 1	gi|109066680,gi|109500010,gi|4504255,gi|56238118,gi|62087582,gi|6912616,gi|74195793	13535.2	1	3	0.234	HLQLAIR	0.86	gi|224567,gi|10800130,gi|109070062,gi|57110393,gi|4504239,gi|109157563,gi|12025520,gi|57110495,gi|57110409,gi|30061327,gi|29244126,gi|74004170,gi|30061371,gi|18105045,gi|57096146,gi|74004189,gi|29553970,gi|57106965,gi|109095827,gi|4504245,gi|817939,gi|24638446,gi|10800144,gi|51304,gi|81884124,gi|28316756,gi|57110427,gi|157821615,gi|4504251,gi|10645195,gi|66730355,gi|73981533,gi|74003986,gi|300613…
300mM with BAF	Zinc finger protein 428 [Homo sapiens].	gi|28279079,gi|32765857,gi|38788219,gi|4096055	20448.1	0.897	1	0.0745	AAQPPAQPCQLCGR	0.95	0
300mM with BAF	Chain F, Structure Of Bovine Heart Cytochrome C Oxidase At The	gi|1942991,gi|223590	10547.8	0.897	1	0.186	ASGGGVPTDEEQATGLER	0.95	0
300mM with BAF	unnamed protein product [Mus musculus]	gi|74220835	65420.4	0.897	1	0.315	AAYEAELGDARK	0.938	gi|27436946,gi|57014043
300mM with BAF	unnamed protein product [Mus musculus]	gi|74220835	65420.4	0.897	1	0.315	EELDFQK	0.918	gi|27436946,gi|57014043
300mM with BAF	unnamed protein product [Mus musculus]	gi|74220835	65420.4	0.897	1	0.315	ITESEEVVSR	0.863	gi|27436946,gi|57014043
300mM with BAF	unnamed protein product [Mus musculus]	gi|74220835	65420.4	0.897	1	0.315	KLLEGEEER	0.95	gi|27436946,gi|57014043,gi|5031877,gi|73987493,gi|27436951
300mM with BAF	unnamed protein product [Mus musculus]	gi|74220835	65420.4	0.897	1	0.315	KQLQDEMLR	0.95	gi|27436946,gi|57014043
300mM with BAF	unnamed protein product [Mus musculus]	gi|74220835	65420.4	0.897	1	0.315	LEAALGEAK	0.819	gi|27436946,gi|57014043
300mM with BAF	unnamed protein product [Mus musculus]	gi|74220835	65420.4	0.897	1	0.315	LKDLEALLNSK	0.95	gi|27436946,gi|57014043
300mM with BAF	unnamed protein product [Mus musculus]	gi|74220835	65420.4	0.897	1	0.315	LQEKEDLQELNDR	0.95	gi|27436946,gi|57014043
300mM with BAF	unnamed protein product [Mus musculus]	gi|74220835	65420.4	0.897	1	0.315	LQLELSK	0.95	gi|27436946,gi|57014043
300mM with BAF	unnamed protein product [Mus musculus]	gi|74220835	65420.4	0.897	1	0.315	LRDLEDSLAR	0.95	gi|27436946,gi|57014043
300mM with BAF	unnamed protein product [Mus musculus]	gi|74220835	65420.4	0.897	1	0.315	LVEIDNGK	0.669	gi|27436946,gi|57014043
300mM with BAF	unnamed protein product [Mus musculus]	gi|74220835	65420.4	0.897	1	0.315	NIYSEELR	0.95	gi|27436946,gi|57014043
300mM with BAF	unnamed protein product [Mus musculus]	gi|74220835	65420.4	0.897	1	0.315	NSNLVGAAHEELQQSR	0.95	gi|27436946,gi|57014043
300mM with BAF	unnamed protein product [Mus musculus]	gi|74220835	65420.4	0.897	1	0.315	SGAQASSTPLSPTR	0.95	gi|27436946,gi|57014043
300mM with BAF	unnamed protein product [Mus musculus]	gi|74220835	65420.4	0.897	1	0.315	TALINSTGEEVAMR	0.95	gi|27436946,gi|57014043
300mM with BAF	unnamed protein product [Mus musculus]	gi|74220835	65420.4	0.897	1	0.315	TLEGELHDLR	0.649	gi|27436946,gi|57014043
300mM with BAF	unnamed protein product [Mus musculus]	gi|74220835	65420.4	0.897	1	0.315	VAVEEVDEEGEFVR	0.95	0
300mM with BAF	PREDICTED: similar to Heterogeneous nuclear ribonucleoprotein D0	gi|109074343,gi|116256512,gi|116256514,gi|13124487,gi|133262,gi|14110414,gi|14110417,gi|14110420,gi|15029896,gi|181914,gi|2773158,gi|3747052,gi|386547,gi|433344,gi|508268,gi|508270,gi|51477708,gi|62738307,gi|74001695,gi|74001699,gi|74001701,gi|74001703,gi|74001707,gi|74001711,gi|870743,gi|870747,gi|929663,gi|9588098,gi|9588100,gi|9588102	19406.8	0.897	1	0.0791	IFVGGLSPDTPEEK	0.95	0
300mM with BAF	PREDICTED: retinoblastoma binding protein 7 isoform 2 [Macaca	gi|109130029,gi|157909799,gi|26347165,gi|4506439,gi|57209888,gi|57209889,gi|74006529,gi|74006531,gi|74006535,gi|74006537,gi|74006545,gi|74138714,gi|74189353,gi|77736219	47802	0.977	2	0.125	GEFGGFGSVTGK	0.95	0
300mM with BAF	PREDICTED: retinoblastoma binding protein 7 isoform 2 [Macaca	gi|109130029,gi|157909799,gi|26347165,gi|4506439,gi|57209888,gi|57209889,gi|74006529,gi|74006531,gi|74006535,gi|74006537,gi|74006545,gi|74138714,gi|74189353,gi|77736219	47802	0.977	2	0.125	LNVWDLSK	0.95	gi|5032027,gi|88930444,gi|55725402,gi|73949950,gi|109475540,gi|1016275,gi|90101524,gi|109001624
300mM with BAF	PREDICTED: retinoblastoma binding protein 7 isoform 2 [Macaca	gi|109130029,gi|157909799,gi|26347165,gi|4506439,gi|57209888,gi|57209889,gi|74006529,gi|74006531,gi|74006535,gi|74006537,gi|74006545,gi|74138714,gi|74189353,gi|77736219	47802	0.977	2	0.125	TPSSDVLVFDYTK	0.95	gi|5032027,gi|88930444,gi|55725402,gi|73949950,gi|109475540,gi|1016275,gi|90101524,gi|109001624
300mM with BAF	PREDICTED: retinoblastoma binding protein 7 isoform 2 [Macaca	gi|109130029,gi|157909799,gi|26347165,gi|4506439,gi|57209888,gi|57209889,gi|74006529,gi|74006531,gi|74006535,gi|74006537,gi|74006545,gi|74138714,gi|74189353,gi|77736219	47802	0.977	2	0.125	TVALWDLR	0.95	gi|5032027,gi|88930444,gi|55725402,gi|73949950,gi|109475540,gi|1016275,gi|90101524,gi|109001624
300mM with BAF	PREDICTED: retinoblastoma binding protein 7 isoform 2 [Macaca	gi|109130029,gi|157909799,gi|26347165,gi|4506439,gi|57209888,gi|57209889,gi|74006529,gi|74006531,gi|74006535,gi|74006537,gi|74006545,gi|74138714,gi|74189353,gi|77736219	47802	0.977	2	0.125	YMPQNPHIIATK	0.533	0
300mM with BAF	keratin 9 [Homo sapiens].	gi|55956899,gi|81175178	62113	1	6	0.124	QGVDADINGLR	0.95	0
300mM with BAF	keratin 9 [Homo sapiens].	gi|55956899,gi|81175178	62113	1	6	0.124	SDLEMQYETLQEELMALK	0.524	0
300mM with BAF	keratin 9 [Homo sapiens].	gi|55956899,gi|81175178	62113	1	6	0.124	SGGGGGGGLGSGGSIR	0.95	0
300mM with BAF	keratin 9 [Homo sapiens].	gi|55956899,gi|81175178	62113	1	6	0.124	STMQELNSR	0.5	0
300mM with BAF	keratin 9 [Homo sapiens].	gi|55956899,gi|81175178	62113	1	6	0.124	TLLDIDNTR	0.912	0
300mM with BAF	keratin 9 [Homo sapiens].	gi|55956899,gi|81175178	62113	1	6	0.124	VQALEEANNDLENK	0.95	0
300mM with BAF	nucleophosmin 1 isoform 1 [Homo sapiens], gi|114662863|ref|XP_001151979.1| PREDICTED: similar to nucleophosmin - human isoform 3 [Pan troglodytes], gi|114662865|ref|XP_001152043.1| PREDICTED: similar to nucleophosmin - human isoform 4 [Pan troglodytes], gi|114762|sp|P06748|NPM_HUMAN Nucleophosmin (NPM) (Nucleolar phosphoprotein B23) (Numatrin) (Nucleolar protein NO38), gi|189272|gb|AAA36380.1| nu…	gi|10835063,gi|109079755,gi|16876992,gi|197101984,gi|33694244,gi|40353734,gi|58220469,gi|73949577,gi|73949583,gi|73949585,gi|73953440,gi|73953442,gi|73953454,gi|73953458,gi|825671	32557.4	0.999	3	0.0986	GPSSVEDIK	0.95	0
300mM with BAF	nucleophosmin 1 isoform 1 [Homo sapiens], gi|114662863|ref|XP_001151979.1| PREDICTED: similar to nucleophosmin - human isoform 3 [Pan troglodytes], gi|114662865|ref|XP_001152043.1| PREDICTED: similar to nucleophosmin - human isoform 4 [Pan troglodytes], gi|114762|sp|P06748|NPM_HUMAN Nucleophosmin (NPM) (Nucleolar phosphoprotein B23) (Numatrin) (Nucleolar protein NO38), gi|189272|gb|AAA36380.1| nu…	gi|10835063,gi|109079755,gi|16876992,gi|197101984,gi|33694244,gi|40353734,gi|58220469,gi|73949577,gi|73949583,gi|73949585,gi|73953440,gi|73953442,gi|73953454,gi|73953458,gi|825671	32557.4	0.999	3	0.0986	LLSISGK	0.663	0
300mM with BAF	nucleophosmin 1 isoform 1 [Homo sapiens], gi|114662863|ref|XP_001151979.1| PREDICTED: similar to nucleophosmin - human isoform 3 [Pan troglodytes], gi|114662865|ref|XP_001152043.1| PREDICTED: similar to nucleophosmin - human isoform 4 [Pan troglodytes], gi|114762|sp|P06748|NPM_HUMAN Nucleophosmin (NPM) (Nucleolar phosphoprotein B23) (Numatrin) (Nucleolar protein NO38), gi|189272|gb|AAA36380.1| nu…	gi|10835063,gi|109079755,gi|16876992,gi|197101984,gi|33694244,gi|40353734,gi|58220469,gi|73949577,gi|73949583,gi|73949585,gi|73953440,gi|73953442,gi|73953454,gi|73953458,gi|825671	32557.4	0.999	3	0.0986	VDNDENEHQLSLR	0.95	0
300mM with BAF	keratin 2 [Homo sapiens].	gi|47132620,gi|547754	65848.4	0.999	3	0.0961	FASFIDK	0.757	gi|109096781,gi|18999435,gi|109096797,gi|81891716,gi|109096795,gi|109096789,gi|109096793,gi|293686
300mM with BAF	keratin 2 [Homo sapiens].	gi|47132620,gi|547754	65848.4	0.999	3	0.0961	FLEQQNQVLQTK	0.95	gi|11935049,gi|109096823,gi|109096825,gi|81891716,gi|109096827,gi|109096829
300mM with BAF	keratin 2 [Homo sapiens].	gi|47132620,gi|547754	65848.4	0.999	3	0.0961	GFSSGSAVVSGGSR	0.95	0
300mM with BAF	keratin 2 [Homo sapiens].	gi|47132620,gi|547754	65848.4	0.999	3	0.0961	IEISELNR	0.837	gi|11935049,gi|109096823,gi|109096825,gi|109096827,gi|109096829
300mM with BAF	keratin 2 [Homo sapiens].	gi|47132620,gi|547754	65848.4	0.999	3	0.0961	NVQDAIADAEQR	0.95	0
300mM with BAF	keratin 2 [Homo sapiens].	gi|47132620,gi|547754	65848.4	0.999	3	0.0961	SLVGLGGTK	0.552	0
300mM with BAF	SWI/SNF-related matrix-associated actin-dependent regulator of chromatin e1 [Homo sapiens], gi|114667531|ref|XP_511478.2| PREDICTED: hypothetical protein LOC454655 isoform 7 [Pan troglodytes], gi|61247587|sp|Q969G3|SMCE1_HUMAN SWI/SNF-related matrix-associated actin-dependent regulator of chromatin subfamily E member 1 (BRG1-associated factor 57), gi|2914753|gb|AAC04509.1| BAF57 [Homo sapiens], g…	gi|10181166,gi|109115237,gi|109115241,gi|109115243,gi|13937941,gi|197102747,gi|21264355,gi|55729939,gi|60552765,gi|68163423,gi|73965989,gi|73965991,gi|73965993,gi|73965995,gi|73965997,gi|73965999,gi|73966001,gi|74007328,gi|82917378	46620.6	0.897	1	0.0316	IAAEIAQAEEQAR	0.95	0
300mM with BAF	unnamed protein product [Mus musculus].	gi|74207672	13492.2	0.897	1	0.234	AGLEFPVGR	0.95	0
300mM with BAF	unnamed protein product [Mus musculus].	gi|74207672	13492.2	0.897	1	0.234	ATIAGGGVIPHIHK	0.95	gi|6912616,gi|56238118,gi|109500010,gi|109066680,gi|62087582,gi|4504255,gi|74195793
300mM with BAF	unnamed protein product [Mus musculus].	gi|74207672	13492.2	0.897	1	0.234	HLQLAIR	0.86	gi|224567,gi|10800130,gi|109070062,gi|57110393,gi|4504239,gi|6912616,gi|109066680,gi|109157563,gi|12025520,gi|57110495,gi|57110409,gi|30061327,gi|29244126,gi|74004170,gi|30061371,gi|18105045,gi|57096146,gi|74004189,gi|29553970,gi|57106965,gi|109095827,gi|4504245,gi|817939,gi|24638446,gi|62087582,gi|10800144,gi|51304,gi|74195793,gi|81884124,gi|28316756,gi|57110427,gi|157821615,gi|4504255,gi|450425…
300mM with BAF	PREDICTED: similar to Chromobox protein homolog 1 (Heterochromatin	gi|109488886,gi|109491751,gi|48249223,gi|5803076	21400.1	0.992	2	0.254	CPQVVISFYEER	0.834	0
300mM with BAF	PREDICTED: similar to Chromobox protein homolog 1 (Heterochromatin	gi|109488886,gi|109491751,gi|48249223,gi|5803076	21400.1	0.992	2	0.254	GKVEYLLK	0.894	gi|109096963,gi|886063,gi|62721107,gi|6912292
300mM with BAF	PREDICTED: similar to Chromobox protein homolog 1 (Heterochromatin	gi|109488886,gi|109491751,gi|48249223,gi|5803076	21400.1	0.992	2	0.254	IIGATDSSGELMFLMK	0.944	gi|82913885,gi|80474659,gi|109100925,gi|109067205,gi|73976140,gi|73976142,gi|7416937,gi|53165,gi|15082258,gi|21903394
300mM with BAF	PREDICTED: similar to Chromobox protein homolog 1 (Heterochromatin	gi|109488886,gi|109491751,gi|48249223,gi|5803076	21400.1	0.992	2	0.254	NSDEADLVPAK	0.95	0
300mM with BAF	Brain abundant, membrane attached signal protein 1 [Homo sapiens].	gi|12653493,gi|30795231	22675.3	0.999	3	0.229	AEPPKAPEQEQAAPGPAAGGEAPK	0.949	0
300mM with BAF	Brain abundant, membrane attached signal protein 1 [Homo sapiens].	gi|12653493,gi|30795231	22675.3	0.999	3	0.229	ESEPQAAAEPAEAK	0.95	0
300mM with BAF	Brain abundant, membrane attached signal protein 1 [Homo sapiens].	gi|12653493,gi|30795231	22675.3	0.999	3	0.229	ETPAATEAPSSTPK	0.586	0
300mM with BAF	mediator of DNA damage checkpoint 1 [Pan troglodytes]	gi|108860677,gi|132626688,gi|15277229,gi|27544394,gi|57209811,gi|86197957	0	1	5	0	GDQESPDACLPPTVPEAPAPPQKPLNSQSQK	0.95	0
300mM with BAF	mediator of DNA damage checkpoint 1 [Pan troglodytes]	gi|108860677,gi|132626688,gi|15277229,gi|27544394,gi|57209811,gi|86197957	0	1	5	0	GPLTVEETPR	0.95	0
300mM with BAF	mediator of DNA damage checkpoint 1 [Pan troglodytes]	gi|108860677,gi|132626688,gi|15277229,gi|27544394,gi|57209811,gi|86197957	0	1	5	0	NQLVTPEPTSR	0.725	0
300mM with BAF	mediator of DNA damage checkpoint 1 [Pan troglodytes]	gi|108860677,gi|132626688,gi|15277229,gi|27544394,gi|57209811,gi|86197957	0	1	5	0	QTDVTGEEELTK	0.95	0
300mM with BAF	mediator of DNA damage checkpoint 1 [Pan troglodytes]	gi|108860677,gi|132626688,gi|15277229,gi|27544394,gi|57209811,gi|86197957	0	1	5	0	VVLLQR	0.583	0
300mM with BAF	casein alphaS1.	gi|225632,gi|30794348,gi|70905149,gi|75038951	24511.4	0.998	2	0.103	FFVAPFPEVFGK	0.95	0
300mM with BAF	casein alphaS1.	gi|225632,gi|30794348,gi|70905149,gi|75038951	24511.4	0.998	2	0.103	YLGYLEQLLR	0.95	0
1M no BAF	coiled-coil domain containing 86 [Homo sapiens], gi|74733605|sp|Q9H6F5|CCD86_HUMAN Coiled-coil domain-containing protein 86 (Cytokine-induced protein with coiled-coil domain), gi|10438660|dbj|BAB15304.1| unnamed protein product [Homo sapiens], gi|12655057|gb|AAH01378.1| Coiled-coil domain containing 86 [Homo sapiens], gi|99905644|gb|ABF68612.1| cyclon [Homo sapiens], gi|119594307|gb|EAW73901.1| c…	gi|13129104,gi|34529396,gi|55636001	40218.1	0.918	1	0.0361	ALVEFESNPEETR	0.95	0
1M no BAF	PREDICTED: similar to Small nuclear ribonucleoprotein Sm D1 (snRNP	gi|109486880,gi|32959908,gi|5902102	13263.9	0.918	1	0.168	YFILPDSLPLDTLLVDVEPK	0.95	0
1M no BAF	pannexin 3 [Homo sapiens], gi|20139071|sp|Q96QZ0|PANX3_HUMAN Pannexin-3, gi|15341532|gb|AAK95655.1|AF406650_1 putative gap junction protein pannexin 3 [Homo sapiens], gi|119587992|gb|EAW67588.1| pannexin 3 [Homo sapiens], gi|157170156|gb|AAI52945.1| Pannexin 3 [synthetic construct] [MASS=44683]	gi|16418453	44668.1	0.918	1	0.0204	QDGPGQDK	0.95	0
1M no BAF	Keratin 10 [Homo sapiens].	gi|21961605,gi|28317	58810.8	1	5	0.0942	ADLEMQIESLTEELAYLK	0.95	0
1M no BAF	Keratin 10 [Homo sapiens].	gi|21961605,gi|28317	58810.8	1	5	0.0942	DAEAWFNEK	0.95	0
1M no BAF	Keratin 10 [Homo sapiens].	gi|21961605,gi|28317	58810.8	1	5	0.0942	SQYEQLAEQNR	0.95	0
1M no BAF	Keratin 10 [Homo sapiens].	gi|21961605,gi|28317	58810.8	1	5	0.0942	VLDELTLTK	0.95	0
1M no BAF	Keratin 10 [Homo sapiens].	gi|21961605,gi|28317	58810.8	1	5	0.0942	YENEVALR	0.763	0
1M no BAF	PREDICTED: similar to splicing factor, arginine/serine-rich 1	gi|109114623,gi|118582269,gi|118582271,gi|179074,gi|197099026,gi|5902076,gi|62088696,gi|73966546,gi|73966552,gi|73966554	27727.1	0.998	2	0.0766	DAEDAVYGR	0.95	0
1M no BAF	PREDICTED: similar to splicing factor, arginine/serine-rich 1	gi|109114623,gi|118582269,gi|118582271,gi|179074,gi|197099026,gi|5902076,gi|62088696,gi|73966546,gi|73966552,gi|73966554	27727.1	0.998	2	0.0766	DGTGVVEFVR	0.95	0
1M no BAF	PREDICTED: similar to histone 1, H2ai (predicted) isoform 1 [Canis	gi|74003971	0	1	6	0	AMGIMNSFVNDIFER	0.95	gi|10800140,gi|27693390,gi|46049029,gi|13386452,gi|109017921,gi|55589506,gi|109070012,gi|74004213,gi|4504277,gi|61835422,gi|68532405,gi|61827353,gi|20336754,gi|31979,gi|184086,gi|68226431,gi|28173554,gi|32113,gi|73975428,gi|16306566
1M no BAF	PREDICTED: similar to histone 1, H2ai (predicted) isoform 1 [Canis	gi|74003971	0	1	6	0	DIQLAR	0.789	gi|109073005
1M no BAF	PREDICTED: similar to histone 1, H2ai (predicted) isoform 1 [Canis	gi|74003971	0	1	6	0	EIAQDFK	0.95	gi|109073005
1M no BAF	PREDICTED: similar to histone 1, H2ai (predicted) isoform 1 [Canis	gi|74003971	0	1	6	0	ESYSVYVYK	0.589	gi|126165296
1M no BAF	PREDICTED: similar to histone 1, H2ai (predicted) isoform 1 [Canis	gi|74003971	0	1	6	0	KESYSVYVYK	0.95	gi|126165296
1M no BAF	PREDICTED: similar to histone 1, H2ai (predicted) isoform 1 [Canis	gi|74003971	0	1	6	0	LLLPGELAK	0.95	gi|10800140,gi|27693390,gi|46049029,gi|13386452,gi|109017921,gi|55589506,gi|109070012,gi|74004213,gi|4504277,gi|61835422,gi|68532405,gi|61827353,gi|20336754,gi|31979,gi|184086,gi|68226431,gi|28173554,gi|32113,gi|73975428,gi|16306566,gi|126165296
1M no BAF	lamin A/C isoform 1 precursor [Homo sapiens], gi|125962|sp|P02545|LMNA_HUMAN Lamin-A/C (70 kDa lamin) (Renal carcinoma antigen NY-REN-32), gi|54035059|gb|AAH14507.1| Lamin A/C [Homo sapiens], gi|55957498|emb|CAI15522.1| lamin A/C [Homo sapiens], gi|190690113|gb|ACE86831.1| lamin A/C protein [synthetic construct], gi|190691485|gb|ACE87517.1| lamin A/C protein [synthetic construct] [MASS=74139]	gi|27436946,gi|57014043	74122.6	1	5	0.101	IDSLSAQLSQLQK	0.95	gi|74220835
1M no BAF	lamin A/C isoform 1 precursor [Homo sapiens], gi|125962|sp|P02545|LMNA_HUMAN Lamin-A/C (70 kDa lamin) (Renal carcinoma antigen NY-REN-32), gi|54035059|gb|AAH14507.1| Lamin A/C [Homo sapiens], gi|55957498|emb|CAI15522.1| lamin A/C [Homo sapiens], gi|190690113|gb|ACE86831.1| lamin A/C protein [synthetic construct], gi|190691485|gb|ACE87517.1| lamin A/C protein [synthetic construct] [MASS=74139]	gi|27436946,gi|57014043	74122.6	1	5	0.101	NSNLVGAAHEELQQSR	0.95	gi|74220835
1M no BAF	lamin A/C isoform 1 precursor [Homo sapiens], gi|125962|sp|P02545|LMNA_HUMAN Lamin-A/C (70 kDa lamin) (Renal carcinoma antigen NY-REN-32), gi|54035059|gb|AAH14507.1| Lamin A/C [Homo sapiens], gi|55957498|emb|CAI15522.1| lamin A/C [Homo sapiens], gi|190690113|gb|ACE86831.1| lamin A/C protein [synthetic construct], gi|190691485|gb|ACE87517.1| lamin A/C protein [synthetic construct] [MASS=74139]	gi|27436946,gi|57014043	74122.6	1	5	0.101	SNEDQSMGNWQIK	0.95	0
1M no BAF	lamin A/C isoform 1 precursor [Homo sapiens], gi|125962|sp|P02545|LMNA_HUMAN Lamin-A/C (70 kDa lamin) (Renal carcinoma antigen NY-REN-32), gi|54035059|gb|AAH14507.1| Lamin A/C [Homo sapiens], gi|55957498|emb|CAI15522.1| lamin A/C [Homo sapiens], gi|190690113|gb|ACE86831.1| lamin A/C protein [synthetic construct], gi|190691485|gb|ACE87517.1| lamin A/C protein [synthetic construct] [MASS=74139]	gi|27436946,gi|57014043	74122.6	1	5	0.101	TALINSTGEEVAMR	0.95	gi|74220835
1M no BAF	lamin A/C isoform 1 precursor [Homo sapiens], gi|125962|sp|P02545|LMNA_HUMAN Lamin-A/C (70 kDa lamin) (Renal carcinoma antigen NY-REN-32), gi|54035059|gb|AAH14507.1| Lamin A/C [Homo sapiens], gi|55957498|emb|CAI15522.1| lamin A/C [Homo sapiens], gi|190690113|gb|ACE86831.1| lamin A/C protein [synthetic construct], gi|190691485|gb|ACE87517.1| lamin A/C protein [synthetic construct] [MASS=74139]	gi|27436946,gi|57014043	74122.6	1	5	0.101	VAVEEVDEEGK	0.95	0
1M no BAF	RecName: Full=Serum albumin; AltName: Full=BSA; AltName:	gi|1351907,gi|30794280,gi|74267962	69306.2	1	4	0.0593	KVPQVSTPTLVEVSR	0.95	gi|229552
1M no BAF	RecName: Full=Serum albumin; AltName: Full=BSA; AltName:	gi|1351907,gi|30794280,gi|74267962	69306.2	1	4	0.0593	QTALVELLK	0.95	gi|229552
1M no BAF	RecName: Full=Serum albumin; AltName: Full=BSA; AltName:	gi|1351907,gi|30794280,gi|74267962	69306.2	1	4	0.0593	VPQVSTPTLVEVSR	0.95	gi|229552
1M no BAF	RecName: Full=Serum albumin; AltName: Full=BSA; AltName:	gi|1351907,gi|30794280,gi|74267962	69306.2	1	4	0.0593	YICDNQDTISSK	0.785	0
1M no BAF	RecName: Full=Histone H1.1; AltName: Full=CTL-1.	gi|121903,gi|45479844,gi|4885375,gi|68534962,gi|74003979	10347.4	1	5	0.471	ALAAAGYDVEK	0.95	gi|57110429,gi|74004254
1M no BAF	RecName: Full=Histone H1.1; AltName: Full=CTL-1.	gi|121903,gi|45479844,gi|4885375,gi|68534962,gi|74003979	10347.4	1	5	0.471	ASGPPVSELITK	0.95	gi|57110429,gi|74004254
1M no BAF	RecName: Full=Histone H1.1; AltName: Full=CTL-1.	gi|121903,gi|45479844,gi|4885375,gi|68534962,gi|74003979	10347.4	1	5	0.471	KALAAAGYDVEK	0.95	gi|57110429,gi|74004254
1M no BAF	RecName: Full=Histone H1.1; AltName: Full=CTL-1.	gi|121903,gi|45479844,gi|4885375,gi|68534962,gi|74003979	10347.4	1	5	0.471	SETAPAAPAAAPPAEK	0.95	0
1M no BAF	RecName: Full=Histone H1.1; AltName: Full=CTL-1.	gi|121903,gi|45479844,gi|4885375,gi|68534962,gi|74003979	10347.4	1	5	0.471	SGVSLAALK	0.527	0
1M no BAF	histone cluster 1, H2bn [Bos taurus].	gi|126165296	13905.5	0.918	1	0.27	AMGNMNSFVNDIFER	0.95	0
1M no BAF	histone cluster 1, H2bn [Bos taurus].	gi|126165296	13905.5	0.918	1	0.27	ESYSVYVYK	0.589	gi|74003971
1M no BAF	histone cluster 1, H2bn [Bos taurus].	gi|126165296	13905.5	0.918	1	0.27	KESYSVYVYK	0.95	gi|74003971
1M no BAF	histone cluster 1, H2bn [Bos taurus].	gi|126165296	13905.5	0.918	1	0.27	LLLPGELAK	0.95	gi|10800140,gi|27693390,gi|46049029,gi|13386452,gi|109017921,gi|55589506,gi|109070012,gi|74004213,gi|4504277,gi|74003971,gi|61835422,gi|68532405,gi|61827353,gi|20336754,gi|31979,gi|184086,gi|68226431,gi|28173554,gi|32113,gi|73975428,gi|16306566
1M no BAF	poly (ADP-ribose) polymerase family, member 1 [Homo sapiens], gi|130781|sp|P09874|PARP1_HUMAN Poly [ADP-ribose] polymerase 1 (PARP-1) (ADPRT) (NAD(+) ADP-ribosyltransferase 1) (Poly[ADP-ribose] synthetase 1), gi|21693601|gb|AAM75364.1|AF524947_1 ADP-ribosyltransferase (NAD+; poly (ADP-ribose) polymerase) [Homo sapiens], gi|178190|gb|AAA51663.1| NAD+ ADP-ribosyltransferase, gi|55663671|emb|CAH7021…	gi|156523968	113070	0.918	1	0.0148	VVSEDFLQDVSASTK	0.95	gi|178152
1M no BAF	unnamed protein product [Mus musculus].	gi|12843046,gi|71043961	26404.1	0.918	1	0.0486	YVNWIQQTIAAN	0.95	0
1M no BAF	unnamed protein product [Homo sapiens].	gi|28590	69277.9	0.918	1	0.0246	KVPEVSTPTLVEVSR	0.95	0
1M no BAF	PREDICTED: similar to 60S ribosomal protein L17 (L23) [Macaca	gi|109048490,gi|109111503,gi|109113585,gi|22001904,gi|28174920,gi|28189725,gi|28189865,gi|42542645,gi|42627879,gi|4506617,gi|57095306,gi|62638830,gi|63101541,gi|73962149,gi|73962151,gi|73962154,gi|73962156,gi|73974342,gi|73977961,gi|73977963,gi|73990257,gi|73990259	21379.5	0.918	1	0.0761	EQIVPKPEEEVAQK	0.95	0
1M no BAF	heterogeneous nuclear ribonucleoprotein A2/B1 isoform 1 [Mus	gi|109134362,gi|124028629,gi|14043072,gi|197101465,gi|32880197,gi|3329498,gi|37747847,gi|4504447,gi|73976110,gi|73976114,gi|73976122,gi|73976124,gi|73976128,gi|73976130,gi|73976132,gi|75074832	32442.9	0.918	1	0.0498	GGGGNFGPGPGSNFR	0.95	0
1M no BAF	PREDICTED: similar to Histone H1.5 (Histone H1a) [Macaca mulatta].	gi|109070064,gi|4885381,gi|55626268	22563.7	0.998	2	0.119	ALAAGGYDVEK	0.95	0
1M no BAF	PREDICTED: similar to Histone H1.5 (Histone H1a) [Macaca mulatta].	gi|109070064,gi|4885381,gi|55626268	22563.7	0.998	2	0.119	SETAPAETATPAPVEK	0.95	0
1M no BAF	unnamed protein product [Homo sapiens]	gi|527578	16574.2	0.918	1	0.05	EDEEVFR	0.95	0
1M no BAF	PREDICTED: similar to 60S ribosomal protein L26 (Silica-induced	gi|109075304,gi|132827,gi|20853839,gi|28189641,gi|292435,gi|4506621,gi|48145773,gi|62638415,gi|76613859,gi|7705813	17240.4	0.915	1	0.0552	DDEVQVVR	0.948	0
1M no BAF	PREDICTED: similar to Serine/threonine-protein kinase ATR (Ataxia	gi|109484152,gi|109485198,gi|60360234,gi|62286489,gi|74205466,gi|74227941	300212	0.918	1	0.0038	EILTKAIHMK	0.95	0
1M no BAF	PREDICTED: similar to ribosomal protein S2 [Macaca mulatta].	gi|109130744,gi|109149636,gi|109483338,gi|1173239,gi|12835827,gi|15055539,gi|18087805,gi|200812,gi|2293579,gi|23491733,gi|2920825,gi|2920831,gi|2920833,gi|37577051,gi|48734721,gi|51458539,gi|55652531,gi|63594466,gi|73959139,gi|73959141,gi|73959145,gi|73959147,gi|73959149,gi|73962610,gi|73962612,gi|74177759,gi|74185303,gi|74186763,gi|74204439,gi|75812930,gi|77415483,gi|82902507,gi|82942489,gi|8295…	31258.2	0.994	2	0.0868	ESEIIDFFLGASLK	0.95	0
1M no BAF	PREDICTED: similar to ribosomal protein S2 [Macaca mulatta].	gi|109130744,gi|109149636,gi|109483338,gi|1173239,gi|12835827,gi|15055539,gi|18087805,gi|200812,gi|2293579,gi|23491733,gi|2920825,gi|2920831,gi|2920833,gi|37577051,gi|48734721,gi|51458539,gi|55652531,gi|63594466,gi|73959139,gi|73959141,gi|73959145,gi|73959147,gi|73959149,gi|73962610,gi|73962612,gi|74177759,gi|74185303,gi|74186763,gi|74204439,gi|75812930,gi|77415483,gi|82902507,gi|82942489,gi|8295…	31258.2	0.994	2	0.0868	GTGIVSAPVPK	0.883	0
1M no BAF	PREDICTED: similar to 60S ribosomal protein L7 [Macaca mulatta].	gi|109080976,gi|109086742,gi|109121042,gi|1335288,gi|15431301,gi|197100552,gi|200770,gi|200785,gi|206736,gi|30109294,gi|307388,gi|31981515,gi|35903,gi|48145663,gi|51704206,gi|554269,gi|55643511,gi|62460552,gi|73988246,gi|73999236,gi|74008755,gi|74181408,gi|74189012,gi|75075876,gi|76779245,gi|88988289	29166.7	0.996	2	0.0766	AGNFYVPAEPK	0.923	0
1M no BAF	PREDICTED: similar to 60S ribosomal protein L7 [Macaca mulatta].	gi|109080976,gi|109086742,gi|109121042,gi|1335288,gi|15431301,gi|197100552,gi|200770,gi|200785,gi|206736,gi|30109294,gi|307388,gi|31981515,gi|35903,gi|48145663,gi|51704206,gi|554269,gi|55643511,gi|62460552,gi|73988246,gi|73999236,gi|74008755,gi|74181408,gi|74189012,gi|75075876,gi|76779245,gi|88988289	29166.7	0.996	2	0.0766	SVNELIYK	0.95	0
1M no BAF	PREDICTED: similar to Myosin regulatory light chain 2,	gi|109121665,gi|15809016,gi|197100396,gi|2119367,gi|21326175,gi|228542,gi|5453740,gi|57089773,gi|62751407,gi|73961895,gi|74226082,gi|8393781	19762.3	0.998	2	0.128	FTDEEVDELYR	0.95	0
1M no BAF	PREDICTED: similar to Myosin regulatory light chain 2,	gi|109121665,gi|15809016,gi|197100396,gi|2119367,gi|21326175,gi|228542,gi|5453740,gi|57089773,gi|62751407,gi|73961895,gi|74226082,gi|8393781	19762.3	0.998	2	0.128	LNGTDPEDVIR	0.95	0
1M no BAF	gi|20302097	gi|20302097	27965.4	0.918	1	0.0397	YMSVNSLQLL	0.95	0
1M no BAF	PREDICTED: heat shock 70kDa protein 5 (glucose-regulated protein,	gi|109112233,gi|16507237,gi|197101513	72316.7	0.918	1	0.026	SQIFSTASDNQPTVTIK	0.95	0
1M no BAF	breakpoint cluster region protein 1 [Homo sapiens]	gi|10120888,gi|3002951,gi|4502389	10000.3	1	3	0.483	AYVVLGQFLVLK	0.95	gi|88953904
1M no BAF	breakpoint cluster region protein 1 [Homo sapiens]	gi|10120888,gi|3002951,gi|4502389	10000.3	1	3	0.483	DFVAEPXGEKPVGSLAGIGEVLGK	0.95	0
1M no BAF	breakpoint cluster region protein 1 [Homo sapiens]	gi|10120888,gi|3002951,gi|4502389	10000.3	1	3	0.483	KDEDLFR	0.813	0
1M no BAF	PREDICTED: similar to structure specific recognition protein 1	gi|109106294,gi|111154063,gi|27502780,gi|4507241,gi|54020668,gi|60552474	81059.6	0.998	2	0.0395	SDHPGISITDLSK	0.95	0
1M no BAF	PREDICTED: similar to structure specific recognition protein 1	gi|109106294,gi|111154063,gi|27502780,gi|4507241,gi|54020668,gi|60552474	81059.6	0.998	2	0.0395	VDNIQAGELTEGIWR	0.95	0
1M no BAF	histone cluster 1, H2ae [Homo sapiens], gi|19557656|ref|NP_003504.2| histone cluster 1, H2ab [Homo sapiens], gi|30061357|ref|NP_835495.1| histone cluster 1, H2ad [Mus musculus], gi|30061361|ref|NP_835493.1| histone cluster 1, H2ag [Mus musculus], gi|30061363|ref|NP_835496.1| histone cluster 1, H2ac [Mus musculus], gi|30061365|ref|NP_835491.1| histone cluster 1, H2an [Mus musculus], gi|30061367|re…	gi|10645195,gi|10800130,gi|10800144,gi|109069903,gi|109070062,gi|109070072,gi|109095827,gi|109157563,gi|109505979,gi|109505989,gi|12025520,gi|149431856,gi|15617199,gi|157821615,gi|18105045,gi|224567,gi|24638446,gi|28316756,gi|29244126,gi|29553970,gi|30061327,gi|30061371,gi|30061379,gi|32111,gi|387182,gi|4504239,gi|4504245,gi|4504251,gi|51304,gi|57096146,gi|57106965,gi|57110393,gi|57110409,gi|5711…	0	0.918	1	0	AGLQFPVGR	0.95	gi|6912616,gi|109066680,gi|62087582,gi|74195793,gi|4504255,gi|56238118,gi|109500010
1M no BAF	histone cluster 1, H2ae [Homo sapiens], gi|19557656|ref|NP_003504.2| histone cluster 1, H2ab [Homo sapiens], gi|30061357|ref|NP_835495.1| histone cluster 1, H2ad [Mus musculus], gi|30061361|ref|NP_835493.1| histone cluster 1, H2ag [Mus musculus], gi|30061363|ref|NP_835496.1| histone cluster 1, H2ac [Mus musculus], gi|30061365|ref|NP_835491.1| histone cluster 1, H2an [Mus musculus], gi|30061367|re…	gi|10645195,gi|10800130,gi|10800144,gi|109069903,gi|109070062,gi|109070072,gi|109095827,gi|109157563,gi|109505979,gi|109505989,gi|12025520,gi|149431856,gi|15617199,gi|157821615,gi|18105045,gi|224567,gi|24638446,gi|28316756,gi|29244126,gi|29553970,gi|30061327,gi|30061371,gi|30061379,gi|32111,gi|387182,gi|4504239,gi|4504245,gi|4504251,gi|51304,gi|57096146,gi|57106965,gi|57110393,gi|57110409,gi|5711…	0	0.918	1	0	HLQLAIR	0.75	gi|6912616,gi|109066680,gi|62087582,gi|74195793,gi|4504255,gi|56238118,gi|74207672,gi|109500010
1M no BAF	histone cluster 1, H2ae [Homo sapiens], gi|19557656|ref|NP_003504.2| histone cluster 1, H2ab [Homo sapiens], gi|30061357|ref|NP_835495.1| histone cluster 1, H2ad [Mus musculus], gi|30061361|ref|NP_835493.1| histone cluster 1, H2ag [Mus musculus], gi|30061363|ref|NP_835496.1| histone cluster 1, H2ac [Mus musculus], gi|30061365|ref|NP_835491.1| histone cluster 1, H2an [Mus musculus], gi|30061367|re…	gi|10645195,gi|10800130,gi|10800144,gi|109069903,gi|109070062,gi|109070072,gi|109095827,gi|109157563,gi|109505979,gi|109505989,gi|12025520,gi|149431856,gi|15617199,gi|157821615,gi|18105045,gi|224567,gi|24638446,gi|28316756,gi|29244126,gi|29553970,gi|30061327,gi|30061371,gi|30061379,gi|32111,gi|387182,gi|4504239,gi|4504245,gi|4504251,gi|51304,gi|57096146,gi|57106965,gi|57110393,gi|57110409,gi|5711…	0	0.918	1	0	VTIAQGGVLPNIQAVLLPK	0.95	0
1M no BAF	Ribosomal protein L14 [Homo sapiens].	gi|12653649	23485.3	0.918	1	0.0648	GTAAAAAAAAAAAK	0.95	0
1M no BAF	PREDICTED: similar to 40S ribosomal protein S25 [Rattus	gi|109483864	15890.4	0.989	2	0.0972	AALQELLSK	0.95	0
1M no BAF	PREDICTED: similar to 40S ribosomal protein S25 [Rattus	gi|109483864	15890.4	0.989	2	0.0972	GSLARAALQELLSK	0.777	0
1M no BAF	SRp55-3.	gi|1049086,gi|1049088,gi|20127499,gi|62087532,gi|73992466,gi|78369222	0	0.918	1	0	DADDAVYELNGK	0.95	0
1M no BAF	PREDICTED: similar to small nuclear ribonucleoparticle-associated	gi|109080354,gi|109080392,gi|109092660,gi|109505083,gi|112307,gi|119331232,gi|12643865,gi|134545,gi|190247,gi|206694,gi|207008,gi|3142634,gi|337459,gi|337461,gi|36495,gi|38150007,gi|4507125,gi|4507135,gi|53690154,gi|57045593,gi|5870129,gi|5870130,gi|62896825,gi|6678053,gi|6730226,gi|73950978,gi|75057373,gi|77020260,gi|77736407,gi|86438323	24596.4	0.918	1	0.0625	GENLVSMTVEGPPPK	0.95	0
1M no BAF	PREDICTED: similar to 60S ribosomal protein L23a [Macaca mulatta].	gi|109076051,gi|109113784,gi|109120362,gi|109148510,gi|109464365,gi|109500504,gi|16741485,gi|17105394,gi|20071865,gi|306549,gi|404015,gi|73950692,gi|76625673,gi|76634831	17678.2	1	4	0.301	IEDNNTLVFIVDVK	0.95	0
1M no BAF	PREDICTED: similar to 60S ribosomal protein L23a [Macaca mulatta].	gi|109076051,gi|109113784,gi|109120362,gi|109148510,gi|109464365,gi|109500504,gi|16741485,gi|17105394,gi|20071865,gi|306549,gi|404015,gi|73950692,gi|76625673,gi|76634831	17678.2	1	4	0.301	KLYDIDVAK	0.95	0
1M no BAF	PREDICTED: similar to 60S ribosomal protein L23a [Macaca mulatta].	gi|109076051,gi|109113784,gi|109120362,gi|109148510,gi|109464365,gi|109500504,gi|16741485,gi|17105394,gi|20071865,gi|306549,gi|404015,gi|73950692,gi|76625673,gi|76634831	17678.2	1	4	0.301	LAPDYDALDVANK	0.95	0
1M no BAF	PREDICTED: similar to 60S ribosomal protein L23a [Macaca mulatta].	gi|109076051,gi|109113784,gi|109120362,gi|109148510,gi|109464365,gi|109500504,gi|16741485,gi|17105394,gi|20071865,gi|306549,gi|404015,gi|73950692,gi|76625673,gi|76634831	17678.2	1	4	0.301	VNTLIRPDGEK	0.95	0
1M no BAF	histone cluster 1, H2bb [Homo sapiens], gi|74004182|ref|XP_853817.1| PREDICTED: similar to H2B histone family, member F [Canis familiaris], gi|109069860|ref|XP_001084180.1| PREDICTED: similar to H2B histone family, member F [Macaca mulatta], gi|114605771|ref|XP_001172713.1| PREDICTED: similar to histone H2B [Pan troglodytes], gi|149731852|ref|XP_001496893.1| PREDICTED: similar to histone cluster …	gi|10800140,gi|109017921,gi|109070012,gi|13386452,gi|16306566,gi|184086,gi|20336754,gi|27693390,gi|28173554,gi|31979,gi|32113,gi|4504277,gi|46049029,gi|55589506,gi|61827353,gi|61835422,gi|68226431,gi|68532405,gi|73975428,gi|74004213	13889.6	0.918	1	0.27	AMGIMNSFVNDIFER	0.95	gi|74003971
1M no BAF	histone cluster 1, H2bb [Homo sapiens], gi|74004182|ref|XP_853817.1| PREDICTED: similar to H2B histone family, member F [Canis familiaris], gi|109069860|ref|XP_001084180.1| PREDICTED: similar to H2B histone family, member F [Macaca mulatta], gi|114605771|ref|XP_001172713.1| PREDICTED: similar to histone H2B [Pan troglodytes], gi|149731852|ref|XP_001496893.1| PREDICTED: similar to histone cluster …	gi|10800140,gi|109017921,gi|109070012,gi|13386452,gi|16306566,gi|184086,gi|20336754,gi|27693390,gi|28173554,gi|31979,gi|32113,gi|4504277,gi|46049029,gi|55589506,gi|61827353,gi|61835422,gi|68226431,gi|68532405,gi|73975428,gi|74004213	13889.6	0.918	1	0.27	KESYSIYVYK	0.95	0
1M no BAF	histone cluster 1, H2bb [Homo sapiens], gi|74004182|ref|XP_853817.1| PREDICTED: similar to H2B histone family, member F [Canis familiaris], gi|109069860|ref|XP_001084180.1| PREDICTED: similar to H2B histone family, member F [Macaca mulatta], gi|114605771|ref|XP_001172713.1| PREDICTED: similar to histone H2B [Pan troglodytes], gi|149731852|ref|XP_001496893.1| PREDICTED: similar to histone cluster …	gi|10800140,gi|109017921,gi|109070012,gi|13386452,gi|16306566,gi|184086,gi|20336754,gi|27693390,gi|28173554,gi|31979,gi|32113,gi|4504277,gi|46049029,gi|55589506,gi|61827353,gi|61835422,gi|68226431,gi|68532405,gi|73975428,gi|74004213	13889.6	0.918	1	0.27	LLLPGELAK	0.95	gi|74003971,gi|126165296
1M no BAF	PREDICTED: similar to 40S ribosomal protein S6 isoform 1 [Macaca	gi|109111441,gi|109124488,gi|15342049,gi|20381196,gi|225901,gi|26389925,gi|337514,gi|337516,gi|34785048,gi|57101416,gi|62752040,gi|6677809,gi|74177679,gi|82885362,gi|82955311	28540.6	0.918	1	0.0321	LIEVDDER	0.95	0
1M no BAF	PREDICTED: similar to H1 histone family, member X isoform 2 [Macaca	gi|109098049,gi|109098051,gi|5174449	22469.9	0.918	1	0.0563	ALVQNDTLLQVK	0.95	0
1M no BAF	keratin 1 [Homo sapiens].	gi|11935049	66050.3	1	6	0.104	AEAESLYQSK	0.95	gi|109096823,gi|109096825,gi|109096827,gi|109096829
1M no BAF	keratin 1 [Homo sapiens].	gi|11935049	66050.3	1	6	0.104	FLEQQNQVLQTK	0.95	gi|109096823,gi|109096825,gi|81891716,gi|47132620,gi|547754,gi|109096827,gi|109096829
1M no BAF	keratin 1 [Homo sapiens].	gi|11935049	66050.3	1	6	0.104	LALDLEIATYR	0.95	gi|109096823,gi|109096825,gi|109096827,gi|109096829
1M no BAF	keratin 1 [Homo sapiens].	gi|11935049	66050.3	1	6	0.104	LNDLEDALQQAK	0.95	gi|109096823,gi|109096825,gi|109096827,gi|109096829
1M no BAF	keratin 1 [Homo sapiens].	gi|11935049	66050.3	1	6	0.104	SLNNQFASFIDK	0.95	gi|109096823,gi|109096825,gi|109096827,gi|109096829
1M no BAF	keratin 1 [Homo sapiens].	gi|11935049	66050.3	1	6	0.104	YEELQITAGR	0.95	gi|109096781,gi|109096823,gi|109096825,gi|109096827,gi|109096829
1M no BAF	PREDICTED: similar to ribosomal protein S18 isoform 1 [Macaca	gi|109073771,gi|149263957,gi|28189422,gi|28189549,gi|6755368,gi|74197062	15380.7	0.918	1	0.0916	YSQVLANGLDNK	0.95	0
1M no BAF	PREDICTED: similar to ribosomal protein S8 [Macaca mulatta].	gi|109075664,gi|13542987,gi|26353710,gi|27689323,gi|28491531,gi|4506743,gi|73977177,gi|73977179,gi|73977181,gi|73977183,gi|73977185,gi|82922494,gi|94387984	24188.4	0.918	1	0.0625	ISSLLEEQFQQGK	0.95	0
1M no BAF	PREDICTED: similar to H3 histone, family 3B [Macaca mulatta]	gi|109073005	15255.5	0.918	1	0.331	DIQLAR	0.789	gi|74003971
1M no BAF	PREDICTED: similar to H3 histone, family 3B [Macaca mulatta]	gi|109073005	15255.5	0.918	1	0.331	EIAQDFK	0.95	gi|74003971
1M no BAF	PREDICTED: similar to H3 histone, family 3B [Macaca mulatta]	gi|109073005	15255.5	0.918	1	0.331	FQSAAIGALQEASEAYLVGLFEDTHLCAIHAK	0.95	0
1M no BAF	PREDICTED: thymopoietin isoform 2 [Macaca mulatta].	gi|109098344	75457.9	0.998	2	0.0417	SELVANNVTLPAGEQR	0.95	0
1M no BAF	PREDICTED: thymopoietin isoform 2 [Macaca mulatta].	gi|109098344	75457.9	0.998	2	0.0417	YGVNPGPIVGTTR	0.95	0
1M no BAF	hypothetical protein [Homo sapiens]	gi|30268331	154148	0.918	1	0.0676	AGVLAHLEEER	0.95	gi|12667788
1M no BAF	hypothetical protein [Homo sapiens]	gi|30268331	154148	0.918	1	0.0676	ALEEAMEQK	0.95	gi|12667788
1M no BAF	hypothetical protein [Homo sapiens]	gi|30268331	154148	0.918	1	0.0676	ALEQQVEEMK	0.95	gi|12667788
1M no BAF	hypothetical protein [Homo sapiens]	gi|30268331	154148	0.918	1	0.0676	ANLQIDQINTDLNLER	0.95	gi|12667788
1M no BAF	hypothetical protein [Homo sapiens]	gi|30268331	154148	0.918	1	0.0676	IAQLEEQLDNETK	0.95	gi|12667788
1M no BAF	hypothetical protein [Homo sapiens]	gi|30268331	154148	0.918	1	0.0676	LEEELDDLLVDLDHQR	0.95	0
1M no BAF	hypothetical protein [Homo sapiens]	gi|30268331	154148	0.918	1	0.0676	NTDQASMPDNTAAQK	0.95	gi|12667788
1M no BAF	myosin, heavy polypeptide 9, non-muscle [Homo sapiens], gi|6166599|sp|P35579.4|MYH9_HUMAN Myosin-9 (Myosin heavy chain 9) (Myosin heavy chain, non-muscle IIa) (Non-muscle myosin heavy chain IIa) (NMMHC II-a) (NMMHC-IIA) (Cellular myosin heavy chain, type A) (Non-muscle myosin heavy chain-A) (NMMHC-A), gi|3169000|emb|CAB05105.1| myosin, heavy chain 9, non-muscle [Homo sapiens], gi|47678583|emb|CAG…	gi|12667788	226520	1	11	0.074	AGVLAHLEEER	0.95	gi|30268331
1M no BAF	myosin, heavy polypeptide 9, non-muscle [Homo sapiens], gi|6166599|sp|P35579.4|MYH9_HUMAN Myosin-9 (Myosin heavy chain 9) (Myosin heavy chain, non-muscle IIa) (Non-muscle myosin heavy chain IIa) (NMMHC II-a) (NMMHC-IIA) (Cellular myosin heavy chain, type A) (Non-muscle myosin heavy chain-A) (NMMHC-A), gi|3169000|emb|CAB05105.1| myosin, heavy chain 9, non-muscle [Homo sapiens], gi|47678583|emb|CAG…	gi|12667788	226520	1	11	0.074	ALEEAMEQK	0.95	gi|30268331
1M no BAF	myosin, heavy polypeptide 9, non-muscle [Homo sapiens], gi|6166599|sp|P35579.4|MYH9_HUMAN Myosin-9 (Myosin heavy chain 9) (Myosin heavy chain, non-muscle IIa) (Non-muscle myosin heavy chain IIa) (NMMHC II-a) (NMMHC-IIA) (Cellular myosin heavy chain, type A) (Non-muscle myosin heavy chain-A) (NMMHC-A), gi|3169000|emb|CAB05105.1| myosin, heavy chain 9, non-muscle [Homo sapiens], gi|47678583|emb|CAG…	gi|12667788	226520	1	11	0.074	ALEQQVEEMK	0.95	gi|30268331
1M no BAF	myosin, heavy polypeptide 9, non-muscle [Homo sapiens], gi|6166599|sp|P35579.4|MYH9_HUMAN Myosin-9 (Myosin heavy chain 9) (Myosin heavy chain, non-muscle IIa) (Non-muscle myosin heavy chain IIa) (NMMHC II-a) (NMMHC-IIA) (Cellular myosin heavy chain, type A) (Non-muscle myosin heavy chain-A) (NMMHC-A), gi|3169000|emb|CAB05105.1| myosin, heavy chain 9, non-muscle [Homo sapiens], gi|47678583|emb|CAG…	gi|12667788	226520	1	11	0.074	ANLQIDQINTDLNLER	0.95	gi|30268331
1M no BAF	myosin, heavy polypeptide 9, non-muscle [Homo sapiens], gi|6166599|sp|P35579.4|MYH9_HUMAN Myosin-9 (Myosin heavy chain 9) (Myosin heavy chain, non-muscle IIa) (Non-muscle myosin heavy chain IIa) (NMMHC II-a) (NMMHC-IIA) (Cellular myosin heavy chain, type A) (Non-muscle myosin heavy chain-A) (NMMHC-A), gi|3169000|emb|CAB05105.1| myosin, heavy chain 9, non-muscle [Homo sapiens], gi|47678583|emb|CAG…	gi|12667788	226520	1	11	0.074	DFSALESQLQDTQELLQEENR	0.95	0
1M no BAF	myosin, heavy polypeptide 9, non-muscle [Homo sapiens], gi|6166599|sp|P35579.4|MYH9_HUMAN Myosin-9 (Myosin heavy chain 9) (Myosin heavy chain, non-muscle IIa) (Non-muscle myosin heavy chain IIa) (NMMHC II-a) (NMMHC-IIA) (Cellular myosin heavy chain, type A) (Non-muscle myosin heavy chain-A) (NMMHC-A), gi|3169000|emb|CAB05105.1| myosin, heavy chain 9, non-muscle [Homo sapiens], gi|47678583|emb|CAG…	gi|12667788	226520	1	11	0.074	IAEFTTNLTEEEEK	0.95	0
1M no BAF	myosin, heavy polypeptide 9, non-muscle [Homo sapiens], gi|6166599|sp|P35579.4|MYH9_HUMAN Myosin-9 (Myosin heavy chain 9) (Myosin heavy chain, non-muscle IIa) (Non-muscle myosin heavy chain IIa) (NMMHC II-a) (NMMHC-IIA) (Cellular myosin heavy chain, type A) (Non-muscle myosin heavy chain-A) (NMMHC-A), gi|3169000|emb|CAB05105.1| myosin, heavy chain 9, non-muscle [Homo sapiens], gi|47678583|emb|CAG…	gi|12667788	226520	1	11	0.074	IAQLEEQLDNETK	0.95	gi|30268331
1M no BAF	myosin, heavy polypeptide 9, non-muscle [Homo sapiens], gi|6166599|sp|P35579.4|MYH9_HUMAN Myosin-9 (Myosin heavy chain 9) (Myosin heavy chain, non-muscle IIa) (Non-muscle myosin heavy chain IIa) (NMMHC II-a) (NMMHC-IIA) (Cellular myosin heavy chain, type A) (Non-muscle myosin heavy chain-A) (NMMHC-A), gi|3169000|emb|CAB05105.1| myosin, heavy chain 9, non-muscle [Homo sapiens], gi|47678583|emb|CAG…	gi|12667788	226520	1	11	0.074	NTDQASMPDNTAAQK	0.95	gi|30268331
1M no BAF	myosin, heavy polypeptide 9, non-muscle [Homo sapiens], gi|6166599|sp|P35579.4|MYH9_HUMAN Myosin-9 (Myosin heavy chain 9) (Myosin heavy chain, non-muscle IIa) (Non-muscle myosin heavy chain IIa) (NMMHC II-a) (NMMHC-IIA) (Cellular myosin heavy chain, type A) (Non-muscle myosin heavy chain-A) (NMMHC-A), gi|3169000|emb|CAB05105.1| myosin, heavy chain 9, non-muscle [Homo sapiens], gi|47678583|emb|CAG…	gi|12667788	226520	1	11	0.074	RGDLPFVVPR	0.95	0
1M no BAF	myosin, heavy polypeptide 9, non-muscle [Homo sapiens], gi|6166599|sp|P35579.4|MYH9_HUMAN Myosin-9 (Myosin heavy chain 9) (Myosin heavy chain, non-muscle IIa) (Non-muscle myosin heavy chain IIa) (NMMHC II-a) (NMMHC-IIA) (Cellular myosin heavy chain, type A) (Non-muscle myosin heavy chain-A) (NMMHC-A), gi|3169000|emb|CAB05105.1| myosin, heavy chain 9, non-muscle [Homo sapiens], gi|47678583|emb|CAG…	gi|12667788	226520	1	11	0.074	SGFEPASLK	0.944	0
1M no BAF	myosin, heavy polypeptide 9, non-muscle [Homo sapiens], gi|6166599|sp|P35579.4|MYH9_HUMAN Myosin-9 (Myosin heavy chain 9) (Myosin heavy chain, non-muscle IIa) (Non-muscle myosin heavy chain IIa) (NMMHC II-a) (NMMHC-IIA) (Cellular myosin heavy chain, type A) (Non-muscle myosin heavy chain-A) (NMMHC-A), gi|3169000|emb|CAB05105.1| myosin, heavy chain 9, non-muscle [Homo sapiens], gi|47678583|emb|CAG…	gi|12667788	226520	1	11	0.074	TELEDTLDSTAAQQELR	0.95	0
1M no BAF	ribosomal protein L4 [Homo sapiens], gi|114657764|ref|XP_001174726.1| PREDICTED: similar to ribosomal protein isoform 2 [Pan troglodytes], gi|22002063|sp|P36578|RL4_HUMAN 60S ribosomal protein L4 (L1), gi|432359|dbj|BAA04887.1| ribosomal protein [Homo sapiens], gi|12655035|gb|AAH01365.1| Ribosomal protein L4 [Homo sapiens], gi|13543304|gb|AAH05817.1| Ribosomal protein L4 [Homo sapiens], gi|140435…	gi|16579885,gi|197097764,gi|62087534	47681.1	0.997	2	0.0773	AAAAAAALQAK	0.95	0
1M no BAF	ribosomal protein L4 [Homo sapiens], gi|114657764|ref|XP_001174726.1| PREDICTED: similar to ribosomal protein isoform 2 [Pan troglodytes], gi|22002063|sp|P36578|RL4_HUMAN 60S ribosomal protein L4 (L1), gi|432359|dbj|BAA04887.1| ribosomal protein [Homo sapiens], gi|12655035|gb|AAH01365.1| Ribosomal protein L4 [Homo sapiens], gi|13543304|gb|AAH05817.1| Ribosomal protein L4 [Homo sapiens], gi|140435…	gi|16579885,gi|197097764,gi|62087534	47681.1	0.997	2	0.0773	QPYAVSELAGHQTSAESWGTGR	0.93	gi|75076107,gi|109081576
1M no BAF	histone H4	gi|223582	11219.5	0.918	1	0.216	DDIQGITKPAIR	0.95	0
1M no BAF	histone H4	gi|223582	11219.5	0.918	1	0.216	ISGLIYEETR	0.868	gi|57098917,gi|4504301,gi|74004206,gi|57106967,gi|74004178,gi|27573730,gi|76631717,gi|94378251,gi|74004246,gi|12847763,gi|109504921,gi|74004256,gi|74004215,gi|74004228
1M no BAF	PREDICTED: similar to ribosomal protein L3 isoform a isoform 5	gi|109080468,gi|109080470,gi|149270989,gi|337580,gi|38454246,gi|4506649,gi|74181618,gi|74185237,gi|74185347,gi|74191638,gi|75076108,gi|76496472,gi|94404874	46091.5	0.918	1	0.0298	NNASTDYDLSDK	0.95	0
1M no BAF	PREDICTED: similar to phosphatidylinositol 4-kinase, catalytic,	gi|109093400,gi|32197216,gi|32425423,gi|38258919,gi|4505807,gi|68533059,gi|73996015,gi|74729460	231282	0.918	1	0.00489	SMSLNIGGAK	0.95	0
1M no BAF	PREDICTED: similar to Myosin light polypeptide 6 (Smooth muscle and	gi|109067280,gi|109097255,gi|109097259,gi|109097265,gi|155369650,gi|17986258,gi|33620739,gi|435585,gi|467828,gi|73968363,gi|94363353	16942.8	0.992	2	0.139	EGNGTVMGAEIR	0.836	0
1M no BAF	PREDICTED: similar to Myosin light polypeptide 6 (Smooth muscle and	gi|109067280,gi|109097255,gi|109097259,gi|109097265,gi|155369650,gi|17986258,gi|33620739,gi|435585,gi|467828,gi|73968363,gi|94363353	16942.8	0.992	2	0.139	HVLVTLGEK	0.95	0
1M no BAF	PREDICTED: similar to 60S ribosomal protein L7a [Macaca mulatta].	gi|109090266,gi|109103256,gi|109103258,gi|109121017,gi|21070334,gi|30410942,gi|40796182,gi|4506661,gi|59808713,gi|62642554,gi|7305443,gi|82930638,gi|82956648,gi|94386298,gi|94966839	29978.3	0.918	1	0.0489	AGVNTVTTLVENK	0.95	0
1M no BAF	Putative RNA methyltransferase NOL1 (Proliferating-cell nucleolar antigen p120) (Proliferation-associated nucleolar protein p120), gi|12653741|gb|AAH00656.1| NOL1 protein [Homo sapiens], gi|118764015|gb|AAI28184.1| NOL1 protein [Homo sapiens] [MASS=89301]	gi|146289861,gi|189422,gi|287723,gi|76779860	94061.9	0.998	2	0.0327	GADSELSTVPSVTK	0.95	0
1M no BAF	Putative RNA methyltransferase NOL1 (Proliferating-cell nucleolar antigen p120) (Proliferation-associated nucleolar protein p120), gi|12653741|gb|AAH00656.1| NOL1 protein [Homo sapiens], gi|118764015|gb|AAI28184.1| NOL1 protein [Homo sapiens] [MASS=89301]	gi|146289861,gi|189422,gi|287723,gi|76779860	94061.9	0.998	2	0.0327	GTDTQTPAVLSPSK	0.95	0
1M no BAF	PREDICTED: similar to 60S ribosomal protein L17 (L23) [Canis	gi|73951919	19867.9	0.918	1	0.0805	EQIVPEPEEEVAQK	0.95	0
1M no BAF	DNA topoisomerase II, alpha isozyme [Homo sapiens], gi|13959709|sp|P11388|TOP2A_HUMAN DNA topoisomerase 2-alpha (DNA topoisomerase II, alpha isozyme), gi|3869316|gb|AAC77388.1| topoisomerase II alpha [Homo sapiens], gi|119581067|gb|EAW60663.1| topoisomerase (DNA) II alpha 170kDa, isoform CRA_c [Homo sapiens], gi|187954517|gb|AAI40792.1| TOP2A protein [Homo sapiens] [MASS=174384]	gi|19913406,gi|292830,gi|4218221	174373	0.918	1	0.00784	SVVSDLEADDVK	0.95	0
1M no BAF	PREDICTED: early endosome antigen 1, 162kD [Macaca mulatta]	gi|109098218	162539	0.918	1	0.00992	MDLQXKSQALENIK	0.95	0
1M no BAF	PREDICTED: vimentin [Macaca mulatta].	gi|109088355,gi|16552261,gi|21757045,gi|340219,gi|62414289,gi|62896523,gi|75075845	52421.2	0.918	1	0.0198	VELQELNDR	0.95	0
1M no BAF	PREDICTED: similar to 60S acidic ribosomal protein P2 (NY-REN-44	gi|109092750,gi|109131204,gi|146198794,gi|27807523,gi|3914781,gi|4506671,gi|61868402,gi|73983454	11721	0.918	1	0.104	NIEDVIAQGIGK	0.95	0
1M no BAF	PREDICTED: keratin 5 isoform 15 [Macaca mulatta]	gi|109096789,gi|109096793,gi|109096795,gi|109096797,gi|18999435	0	0.918	1	0	LALDVEIATYR	0.95	gi|109096781,gi|47132620,gi|547754,gi|293686
1M no BAF	H2A histone family, member Y isoform 1 [Homo sapiens].	gi|20336746,gi|32492946,gi|3493529,gi|4758496,gi|63100748,gi|73971330,gi|93141018	39472.7	1	4	0.191	AASADSTTEGTPADGFTVLSTK	0.95	0
1M no BAF	H2A histone family, member Y isoform 1 [Homo sapiens].	gi|20336746,gi|32492946,gi|3493529,gi|4758496,gi|63100748,gi|73971330,gi|93141018	39472.7	1	4	0.191	AGVIFPVGR	0.871	0
1M no BAF	H2A histone family, member Y isoform 1 [Homo sapiens].	gi|20336746,gi|32492946,gi|3493529,gi|4758496,gi|63100748,gi|73971330,gi|93141018	39472.7	1	4	0.191	GVTIASGGVLPNIHPELLAK	0.95	0
1M no BAF	H2A histone family, member Y isoform 1 [Homo sapiens].	gi|20336746,gi|32492946,gi|3493529,gi|4758496,gi|63100748,gi|73971330,gi|93141018	39472.7	1	4	0.191	NGPLEVAGAAVSAGHGLPAK	0.95	0
1M no BAF	PREDICTED: similar to 60S ribosomal protein L29 (Cell surface heparin-binding protein HIP) [Macaca mulatta]	gi|109081736,gi|109116082,gi|27482992,gi|4506629,gi|48734757,gi|55959755,gi|793843,gi|88982429	17649.9	0.918	1	0.0943	AQAAAPASVPAQAPK	0.95	0
1M no BAF	unnamed protein product [Mus musculus]	gi|74178273	0	0.918	1	0	AGFAGDDAPR	0.95	gi|15277503,gi|66735458,gi|1351867,gi|62897409,gi|14250401,gi|73964667,gi|2318133,gi|73958059,gi|74151948,gi|62897625,gi|809561,gi|74191399,gi|74190672,gi|60389477,gi|109492380,gi|73958065,gi|73958067,gi|74191566,gi|74191564,gi|74213524,gi|47116231,gi|45269029,gi|16924319,gi|62897671,gi|67971314,gi|74187644,gi|197099682,gi|4501887,gi|4501885,gi|28336
1M no BAF	unnamed protein product [Mus musculus]	gi|74178273	0	0.918	1	0	GYSFTTTAER	0.95	gi|15277503,gi|66735458,gi|1351867,gi|62897409,gi|14250401,gi|73964667,gi|2318133,gi|73958059,gi|74151948,gi|62897625,gi|2724046,gi|809561,gi|74191399,gi|74190672,gi|60389477,gi|109492380,gi|73958065,gi|73958067,gi|74191566,gi|74191564,gi|74213524,gi|47116231,gi|45269029,gi|16924319,gi|62897671,gi|67971314,gi|74187644,gi|197099682,gi|4501887,gi|4501885,gi|28336
1M no BAF	unnamed protein product [Mus musculus]	gi|74178273	0	0.918	1	0	QEYDESGPSIVHR	0.95	gi|15277503,gi|66735458,gi|1351867,gi|62897409,gi|14250401,gi|73964667,gi|2318133,gi|73958059,gi|74151948,gi|62897625,gi|2724046,gi|809561,gi|74191399,gi|74190672,gi|60389477,gi|109492380,gi|73958065,gi|73958067,gi|74191566,gi|74191564,gi|74213524,gi|47116231,gi|45269029,gi|16924319,gi|62897671,gi|67971314,gi|74187644,gi|197099682,gi|4501887,gi|4501885,gi|28336
1M no BAF	unnamed protein product [Mus musculus]	gi|74178273	0	0.918	1	0	YPIEHGIITNWDDMEK	0.95	0
1M no BAF	PREDICTED: similar to Nhp2 non-histone chromosome protein 2-like 1	gi|109094377,gi|12835698,gi|2098765,gi|4826860,gi|74008341	14155.8	0.918	1	0.0938	QQIQSIQQSIER	0.95	0
1M no BAF	PREDICTED: similar to nuclease sensitive element binding protein 1	gi|109003367,gi|109475401,gi|109490740,gi|181486,gi|199821,gi|203398,gi|203999,gi|2745892,gi|27807361,gi|29437175,gi|38142418,gi|55451,gi|73909033,gi|73950968,gi|73950974,gi|74007889,gi|92373398,gi|9653686,gi|988283	35711.5	0.918	1	0.059	GAEAANVTGPGGVPVQGSK	0.95	0
1M no BAF	PREDICTED: similar to Actin, cytoplasmic 2 (Gamma-actin) [Rattus	gi|109492380,gi|1351867,gi|14250401,gi|15277503,gi|16924319,gi|197099682,gi|2318133,gi|28336,gi|4501885,gi|4501887,gi|45269029,gi|47116231,gi|60389477,gi|62897409,gi|62897625,gi|62897671,gi|66735458,gi|67971314,gi|73958059,gi|73958065,gi|73958067,gi|73964667,gi|74151948,gi|74187644,gi|74190672,gi|74191399,gi|74191564,gi|74191566,gi|74213524,gi|809561	41719.8	1	5	0.165	AGFAGDDAPR	0.95	gi|74178273
1M no BAF	PREDICTED: similar to Actin, cytoplasmic 2 (Gamma-actin) [Rattus	gi|109492380,gi|1351867,gi|14250401,gi|15277503,gi|16924319,gi|197099682,gi|2318133,gi|28336,gi|4501885,gi|4501887,gi|45269029,gi|47116231,gi|60389477,gi|62897409,gi|62897625,gi|62897671,gi|66735458,gi|67971314,gi|73958059,gi|73958065,gi|73958067,gi|73964667,gi|74151948,gi|74187644,gi|74190672,gi|74191399,gi|74191564,gi|74191566,gi|74213524,gi|809561	41719.8	1	5	0.165	EITALAPSTMK	0.95	gi|2724046
1M no BAF	PREDICTED: similar to Actin, cytoplasmic 2 (Gamma-actin) [Rattus	gi|109492380,gi|1351867,gi|14250401,gi|15277503,gi|16924319,gi|197099682,gi|2318133,gi|28336,gi|4501885,gi|4501887,gi|45269029,gi|47116231,gi|60389477,gi|62897409,gi|62897625,gi|62897671,gi|66735458,gi|67971314,gi|73958059,gi|73958065,gi|73958067,gi|73964667,gi|74151948,gi|74187644,gi|74190672,gi|74191399,gi|74191564,gi|74191566,gi|74213524,gi|809561	41719.8	1	5	0.165	GYSFTTTAER	0.95	gi|74178273,gi|2724046
1M no BAF	PREDICTED: similar to Actin, cytoplasmic 2 (Gamma-actin) [Rattus	gi|109492380,gi|1351867,gi|14250401,gi|15277503,gi|16924319,gi|197099682,gi|2318133,gi|28336,gi|4501885,gi|4501887,gi|45269029,gi|47116231,gi|60389477,gi|62897409,gi|62897625,gi|62897671,gi|66735458,gi|67971314,gi|73958059,gi|73958065,gi|73958067,gi|73964667,gi|74151948,gi|74187644,gi|74190672,gi|74191399,gi|74191564,gi|74191566,gi|74213524,gi|809561	41719.8	1	5	0.165	QEYDESGPSIVHR	0.95	gi|74178273,gi|2724046
1M no BAF	PREDICTED: similar to Actin, cytoplasmic 2 (Gamma-actin) [Rattus	gi|109492380,gi|1351867,gi|14250401,gi|15277503,gi|16924319,gi|197099682,gi|2318133,gi|28336,gi|4501885,gi|4501887,gi|45269029,gi|47116231,gi|60389477,gi|62897409,gi|62897625,gi|62897671,gi|66735458,gi|67971314,gi|73958059,gi|73958065,gi|73958067,gi|73964667,gi|74151948,gi|74187644,gi|74190672,gi|74191399,gi|74191564,gi|74191566,gi|74213524,gi|809561	41719.8	1	5	0.165	VAPEEHPVLLTEAPLNPK	0.95	gi|2724046
1M no BAF	immunity-related GTPase family M member 1 [Mus musculus].	gi|56800250,gi|6680351,gi|74195628	46534.8	0.918	1	0.0171	STERALR	0.95	0
1M no BAF	PREDICTED: similar to nucleolin [Macaca mulatta].	gi|109101818,gi|189306,gi|197098386,gi|21750187,gi|34534595,gi|55956788,gi|75075722	76597.9	1	5	0.0915	EAMEDGEIDGNK	0.95	0
1M no BAF	PREDICTED: similar to nucleolin [Macaca mulatta].	gi|109101818,gi|189306,gi|197098386,gi|21750187,gi|34534595,gi|55956788,gi|75075722	76597.9	1	5	0.0915	GIAYIEFK	0.773	0
1M no BAF	PREDICTED: similar to nucleolin [Macaca mulatta].	gi|109101818,gi|189306,gi|197098386,gi|21750187,gi|34534595,gi|55956788,gi|75075722	76597.9	1	5	0.0915	GYAFIEFASFEDAK	0.95	0
1M no BAF	PREDICTED: similar to nucleolin [Macaca mulatta].	gi|109101818,gi|189306,gi|197098386,gi|21750187,gi|34534595,gi|55956788,gi|75075722	76597.9	1	5	0.0915	SISLYYTGEK	0.95	0
1M no BAF	PREDICTED: similar to nucleolin [Macaca mulatta].	gi|109101818,gi|189306,gi|197098386,gi|21750187,gi|34534595,gi|55956788,gi|75075722	76597.9	1	5	0.0915	VEGTEPTTAFNLFVGNLNFNK	0.95	0
1M no BAF	DEAH (Asp-Glu-Ala-His) box polypeptide 9 [Homo sapiens], gi|116241330|sp|Q08211|DHX9_HUMAN ATP-dependent RNA helicase A (Nuclear DNA helicase II) (NDH II) (DEAH box protein 9), gi|55662450|emb|CAH71701.1| DEAH (Asp-Glu-Ala-His) box polypeptide 9 [Homo sapiens], gi|56206329|emb|CAI19277.1| DEAH (Asp-Glu-Ala-His) box polypeptide 9 [Homo sapiens], gi|119611544|gb|EAW91138.1| DEAH (Asp-Glu-Ala-His) b…	gi|100913206,gi|109019116,gi|1806048,gi|71153339,gi|71153505,gi|73960433,gi|73960435,gi|73960441,gi|73960443,gi|74202542	140862	0.918	1	0.00945	ETPFELIEALLK	0.95	0
1M no BAF	PREDICTED: similar to ribosomal protein L30 isoform 1 [Macaca	gi|109087037,gi|4506631,gi|57113163,gi|71681466	12766.7	0.983	2	0.157	LQLVMK	0.667	0
1M no BAF	PREDICTED: similar to ribosomal protein L30 isoform 1 [Macaca	gi|109087037,gi|4506631,gi|57113163,gi|71681466	12766.7	0.983	2	0.157	LVILANNCPALR	0.95	0
1M no BAF	Chain A, High Resolution Solution Nmr Structure Of Mixed Disulfide Intermediate Between Mutant Human Thioredoxin And A 13 Residue Peptide Comprising Its Target Site In Human Nfkb, gi|1065113|pdb|1MDJ|A Chain A, High Resolution Solution Nmr Structure Of Mixed Disulfide Intermediate Between Human Thioredoxin (C35a, C62a, C69a, C73a) Mutant And A 13 Residue Peptide Comprising Its Target Site In Huma…	gi|1065111,gi|3153859,gi|50592994,gi|55957946,gi|67461921,gi|914044,gi|9280551	11561.1	0.918	1	0.124	TAFQEALDAAGDK	0.95	0
1M no BAF	Chain A, Trypsin In Complex With Borate.	gi|110590762,gi|136429,gi|2914482	23457.3	1	4	0.26	IITHPNFNGNTLDNDIMLIK	0.95	0
1M no BAF	Chain A, Trypsin In Complex With Borate.	gi|110590762,gi|136429,gi|2914482	23457.3	1	4	0.26	LGEHNIDVLEGNEQFINAAK	0.95	0
1M no BAF	Chain A, Trypsin In Complex With Borate.	gi|110590762,gi|136429,gi|2914482	23457.3	1	4	0.26	LSSPATLNSR	0.95	0
1M no BAF	Chain A, Trypsin In Complex With Borate.	gi|110590762,gi|136429,gi|2914482	23457.3	1	4	0.26	VATVSLPR	0.95	0
1M no BAF	PREDICTED: similar to H2A histone family, member V isoform 1	gi|109066680,gi|109500010,gi|4504255,gi|56238118,gi|62087582,gi|6912616,gi|74195793	13535.2	0.998	3	0.203	AGLQFPVGR	0.95	gi|224567,gi|10800130,gi|109070062,gi|57110393,gi|4504239,gi|109157563,gi|12025520,gi|57110495,gi|57110409,gi|30061327,gi|29244126,gi|74004170,gi|30061371,gi|18105045,gi|57096146,gi|74004189,gi|29553970,gi|57106965,gi|109095827,gi|4504245,gi|817939,gi|24638446,gi|10800144,gi|51304,gi|81884124,gi|28316756,gi|57110427,gi|157821615,gi|4504251,gi|10645195,gi|66730355,gi|73981533,gi|74003986,gi|300613…
1M no BAF	PREDICTED: similar to H2A histone family, member V isoform 1	gi|109066680,gi|109500010,gi|4504255,gi|56238118,gi|62087582,gi|6912616,gi|74195793	13535.2	0.998	3	0.203	GDEELDSLIK	0.848	gi|74207672
1M no BAF	PREDICTED: similar to H2A histone family, member V isoform 1	gi|109066680,gi|109500010,gi|4504255,gi|56238118,gi|62087582,gi|6912616,gi|74195793	13535.2	0.998	3	0.203	HLQLAIR	0.75	gi|224567,gi|10800130,gi|109070062,gi|57110393,gi|4504239,gi|109157563,gi|12025520,gi|57110495,gi|57110409,gi|30061327,gi|29244126,gi|74004170,gi|30061371,gi|18105045,gi|57096146,gi|74004189,gi|29553970,gi|57106965,gi|109095827,gi|4504245,gi|817939,gi|24638446,gi|10800144,gi|51304,gi|81884124,gi|28316756,gi|57110427,gi|157821615,gi|4504251,gi|10645195,gi|66730355,gi|73981533,gi|74003986,gi|300613…
1M no BAF	PREDICTED: similar to Protein CGI-117 [Macaca mulatta].	gi|109079835,gi|148747209,gi|34783430,gi|48146455,gi|4929703	21130.8	0.918	1	0.0787	QNLAEMGLAVDPNR	0.95	0
1M no BAF	PREDICTED: similar to Splicing factor, arginine/serine-rich 3 (Pre-mRNA-splicing factor SRP20) (X16 protein) [Macaca mulatta]	gi|109070902,gi|109504563,gi|12844972,gi|2125864,gi|4506901,gi|5441529,gi|73972720	19312	0.918	1	0.0732	VYVGNLGNNGNK	0.95	0
1M no BAF	chromatin-specific transcription elongation factor large subunit [Homo sapiens], gi|114651875|ref|XP_528703.2| PREDICTED: similar to chromatin-specific transcription elongation factor FACT 140 kDa subunit isoform 2 [Pan troglodytes], gi|74753511|sp|Q9Y5B9|SPT16_HUMAN FACT complex subunit SPT16 (Facilitates chromatin transcription complex subunit SPT16) (hSPT16) (FACT 140 kDa subunit) (FACTp140) (…	gi|6005757,gi|73977348,gi|73977350,gi|76627095	119899	0.918	1	0.0162	APGEQTVPALNLQNAFR	0.95	0
1M no BAF	alpha-1,3(6)-mannosylglycoprotein beta-1,6-N-acetyl-glucosaminyltransferase [Homo sapiens], gi|114580983|ref|XP_515802.2| PREDICTED: alpha-1,3(6)-mannosylglycoprotein beta-1,6-N-acetyl-glucosaminyltransferase isoform 2 [Pan troglodytes], gi|114580985|ref|XP_001151033.1| PREDICTED: alpha-1,3(6)-mannosylglycoprotein beta-1,6-N-acetyl-glucosaminyltransferase isoform 1 [Pan troglodytes], gi|1169980|s…	gi|4505167,gi|62822242,gi|73984271	84526.8	0.918	1	0.0148	KVLVHLGLLTK	0.95	0
1M no BAF	PREDICTED: similar to Nucleolar phosphoprotein p130 (Nucleolar 130	gi|109090387,gi|109090389,gi|109090391,gi|12804871,gi|148596949,gi|197099164,gi|434765,gi|663008	74493.1	0.998	2	0.0354	DNQLSEVANK	0.95	0
1M no BAF	PREDICTED: similar to Nucleolar phosphoprotein p130 (Nucleolar 130	gi|109090387,gi|109090389,gi|109090391,gi|12804871,gi|148596949,gi|197099164,gi|434765,gi|663008	74493.1	0.998	2	0.0354	VVPSDLYPLVLGFLR	0.95	0
1M no BAF	nucleophosmin 1 isoform 1 [Homo sapiens], gi|114662863|ref|XP_001151979.1| PREDICTED: similar to nucleophosmin - human isoform 3 [Pan troglodytes], gi|114662865|ref|XP_001152043.1| PREDICTED: similar to nucleophosmin - human isoform 4 [Pan troglodytes], gi|114762|sp|P06748|NPM_HUMAN Nucleophosmin (NPM) (Nucleolar phosphoprotein B23) (Numatrin) (Nucleolar protein NO38), gi|189272|gb|AAA36380.1| nu…	gi|10835063,gi|109079755,gi|16876992,gi|197101984,gi|33694244,gi|40353734,gi|58220469,gi|73949577,gi|73949583,gi|73949585,gi|73953440,gi|73953442,gi|73953454,gi|73953458,gi|825671	32557.4	1	4	0.187	LLSISGK	0.902	0
1M no BAF	nucleophosmin 1 isoform 1 [Homo sapiens], gi|114662863|ref|XP_001151979.1| PREDICTED: similar to nucleophosmin - human isoform 3 [Pan troglodytes], gi|114662865|ref|XP_001152043.1| PREDICTED: similar to nucleophosmin - human isoform 4 [Pan troglodytes], gi|114762|sp|P06748|NPM_HUMAN Nucleophosmin (NPM) (Nucleolar phosphoprotein B23) (Numatrin) (Nucleolar protein NO38), gi|189272|gb|AAA36380.1| nu…	gi|10835063,gi|109079755,gi|16876992,gi|197101984,gi|33694244,gi|40353734,gi|58220469,gi|73949577,gi|73949583,gi|73949585,gi|73953440,gi|73953442,gi|73953454,gi|73953458,gi|825671	32557.4	1	4	0.187	MSVQPTVSLGGFEITPPVVLR	0.95	0
1M no BAF	nucleophosmin 1 isoform 1 [Homo sapiens], gi|114662863|ref|XP_001151979.1| PREDICTED: similar to nucleophosmin - human isoform 3 [Pan troglodytes], gi|114662865|ref|XP_001152043.1| PREDICTED: similar to nucleophosmin - human isoform 4 [Pan troglodytes], gi|114762|sp|P06748|NPM_HUMAN Nucleophosmin (NPM) (Nucleolar phosphoprotein B23) (Numatrin) (Nucleolar protein NO38), gi|189272|gb|AAA36380.1| nu…	gi|10835063,gi|109079755,gi|16876992,gi|197101984,gi|33694244,gi|40353734,gi|58220469,gi|73949577,gi|73949583,gi|73949585,gi|73953440,gi|73953442,gi|73953454,gi|73953458,gi|825671	32557.4	1	4	0.187	MTDQEAIQDLWQWR	0.95	0
1M no BAF	nucleophosmin 1 isoform 1 [Homo sapiens], gi|114662863|ref|XP_001151979.1| PREDICTED: similar to nucleophosmin - human isoform 3 [Pan troglodytes], gi|114662865|ref|XP_001152043.1| PREDICTED: similar to nucleophosmin - human isoform 4 [Pan troglodytes], gi|114762|sp|P06748|NPM_HUMAN Nucleophosmin (NPM) (Nucleolar phosphoprotein B23) (Numatrin) (Nucleolar protein NO38), gi|189272|gb|AAA36380.1| nu…	gi|10835063,gi|109079755,gi|16876992,gi|197101984,gi|33694244,gi|40353734,gi|58220469,gi|73949577,gi|73949583,gi|73949585,gi|73953440,gi|73953442,gi|73953454,gi|73953458,gi|825671	32557.4	1	4	0.187	VDNDENEHQLSLR	0.95	0
1M no BAF	keratin 2 [Homo sapiens].	gi|47132620,gi|547754	65848.4	0.918	1	0.0527	FLEQQNQVLQTK	0.95	gi|11935049,gi|109096823,gi|109096825,gi|81891716,gi|109096827,gi|109096829
1M no BAF	keratin 2 [Homo sapiens].	gi|47132620,gi|547754	65848.4	0.918	1	0.0527	LALDVEIATYR	0.95	gi|109096781,gi|18999435,gi|109096797,gi|109096795,gi|109096789,gi|109096793,gi|293686
1M no BAF	keratin 2 [Homo sapiens].	gi|47132620,gi|547754	65848.4	0.918	1	0.0527	TAAENDFVTLK	0.95	0
1M no BAF	PREDICTED: similar to 60S ribosomal protein L7a [Rattus	gi|62666132	29776.2	0.918	1	0.0714	RPPVLLAGVNTVTTLVENK	0.95	0
1M no BAF	ribosomal protein L13 [Homo sapiens], gi|15431297|ref|NP_000968.2| ribosomal protein L13 [Homo sapiens], gi|21903462|sp|P26373|RL13_HUMAN 60S ribosomal protein L13 (Breast basic conserved protein 1), gi|13436332|gb|AAH04954.1| RPL13 protein [Homo sapiens], gi|13938412|gb|AAH07345.1| Ribosomal protein L13 [Homo sapiens], gi|14043151|gb|AAH07563.1| Ribosomal protein L13 [Homo sapiens], gi|14043668|…	gi|15431295,gi|42490910	24244.2	0.994	2	0.0995	STESLQANVQR	0.889	0
1M no BAF	ribosomal protein L13 [Homo sapiens], gi|15431297|ref|NP_000968.2| ribosomal protein L13 [Homo sapiens], gi|21903462|sp|P26373|RL13_HUMAN 60S ribosomal protein L13 (Breast basic conserved protein 1), gi|13436332|gb|AAH04954.1| RPL13 protein [Homo sapiens], gi|13938412|gb|AAH07345.1| Ribosomal protein L13 [Homo sapiens], gi|14043151|gb|AAH07563.1| Ribosomal protein L13 [Homo sapiens], gi|14043668|…	gi|15431295,gi|42490910	24244.2	0.994	2	0.0995	VATWFNQPAR	0.95	0
1M no BAF	ribosomal protein L18 [Rattus norvegicus].	gi|13592057,gi|3122678,gi|4506607,gi|57036383,gi|62752012,gi|74006513,gi|89573859,gi|89573861,gi|89573863,gi|89573867,gi|89573879,gi|89573881,gi|89573883,gi|89573885,gi|89573887,gi|89573889,gi|89573891,gi|89573893,gi|89573899,gi|89573901	21641.5	0.998	2	0.112	TNRPPLSLSR	0.95	0
1M no BAF	ribosomal protein L18 [Rattus norvegicus].	gi|13592057,gi|3122678,gi|4506607,gi|57036383,gi|62752012,gi|74006513,gi|89573859,gi|89573861,gi|89573863,gi|89573867,gi|89573879,gi|89573881,gi|89573883,gi|89573885,gi|89573887,gi|89573889,gi|89573891,gi|89573893,gi|89573899,gi|89573901	21641.5	0.998	2	0.112	TNSTFNQVVLK	0.95	0
1M no BAF	Brain abundant, membrane attached signal protein 1 [Homo sapiens].	gi|12653493,gi|30795231	22675.3	0.995	2	0.185	AAEAAAAPAESAAPAAGEEPSKEEGEPK	0.95	0
1M no BAF	Brain abundant, membrane attached signal protein 1 [Homo sapiens].	gi|12653493,gi|30795231	22675.3	0.995	2	0.185	ESEPQAAAEPAEAK	0.91	0
1M with BAF	Keratin 10 [Homo sapiens].	gi|21961605,gi|28317	58810.8	1	7	0.168	ADLEMQIESLTEELAYLK	0.95	0
1M with BAF	Keratin 10 [Homo sapiens].	gi|21961605,gi|28317	58810.8	1	7	0.168	GSLGGGFSSGGFSGGSFSR	0.95	0
1M with BAF	Keratin 10 [Homo sapiens].	gi|21961605,gi|28317	58810.8	1	7	0.168	LASYLDK	0.95	gi|55956899,gi|81175178,gi|24430192,gi|15431310,gi|1195531,gi|386848,gi|21754583,gi|4557701,gi|12803709
1M with BAF	Keratin 10 [Homo sapiens].	gi|21961605,gi|28317	58810.8	1	7	0.168	LENEIQTYR	0.95	0
1M with BAF	Keratin 10 [Homo sapiens].	gi|21961605,gi|28317	58810.8	1	7	0.168	NQILNLTTDNANILLQIDNAR	0.95	0
1M with BAF	Keratin 10 [Homo sapiens].	gi|21961605,gi|28317	58810.8	1	7	0.168	QSLEASLAETEGR	0.95	0
1M with BAF	Keratin 10 [Homo sapiens].	gi|21961605,gi|28317	58810.8	1	7	0.168	QSVEADINGLR	0.95	0
1M with BAF	PREDICTED: similar to histone 1, H2ai (predicted) isoform 1 [Canis	gi|74003971	28977.8	1	5	0.185	AMGIMNSFVNDIFER	0.95	gi|10800140,gi|27693390,gi|46049029,gi|13386452,gi|109017921,gi|55589506,gi|109070012,gi|74004213,gi|4504277,gi|61835422,gi|68532405,gi|61827353,gi|20336754,gi|31979,gi|184086,gi|68226431,gi|28173554,gi|32113,gi|73975428,gi|16306566
1M with BAF	PREDICTED: similar to histone 1, H2ai (predicted) isoform 1 [Canis	gi|74003971	28977.8	1	5	0.185	EIAQDFK	0.95	gi|109073005
1M with BAF	PREDICTED: similar to histone 1, H2ai (predicted) isoform 1 [Canis	gi|74003971	28977.8	1	5	0.185	KESYSVYVYK	0.95	gi|126165296
1M with BAF	PREDICTED: similar to histone 1, H2ai (predicted) isoform 1 [Canis	gi|74003971	28977.8	1	5	0.185	LLLPGELAK	0.929	gi|10800140,gi|27693390,gi|46049029,gi|13386452,gi|109017921,gi|55589506,gi|109070012,gi|74004213,gi|4504277,gi|61835422,gi|68532405,gi|61827353,gi|20336754,gi|31979,gi|184086,gi|68226431,gi|28173554,gi|32113,gi|73975428,gi|16306566,gi|126165296
1M with BAF	PREDICTED: similar to histone 1, H2ai (predicted) isoform 1 [Canis	gi|74003971	28977.8	1	5	0.185	STELLIR	0.95	gi|109073005
1M with BAF	lamin A/C isoform 1 precursor [Homo sapiens], gi|125962|sp|P02545|LMNA_HUMAN Lamin-A/C (70 kDa lamin) (Renal carcinoma antigen NY-REN-32), gi|54035059|gb|AAH14507.1| Lamin A/C [Homo sapiens], gi|55957498|emb|CAI15522.1| lamin A/C [Homo sapiens], gi|190690113|gb|ACE86831.1| lamin A/C protein [synthetic construct], gi|190691485|gb|ACE87517.1| lamin A/C protein [synthetic construct] [MASS=74139]	gi|27436946,gi|57014043	74122.6	1	12	0.229	AQNTWGCGNSLR	0.95	0
1M with BAF	lamin A/C isoform 1 precursor [Homo sapiens], gi|125962|sp|P02545|LMNA_HUMAN Lamin-A/C (70 kDa lamin) (Renal carcinoma antigen NY-REN-32), gi|54035059|gb|AAH14507.1| Lamin A/C [Homo sapiens], gi|55957498|emb|CAI15522.1| lamin A/C [Homo sapiens], gi|190690113|gb|ACE86831.1| lamin A/C protein [synthetic construct], gi|190691485|gb|ACE87517.1| lamin A/C protein [synthetic construct] [MASS=74139]	gi|27436946,gi|57014043	74122.6	1	12	0.229	ASASGSGAQVGGPISSGSSASSVTVTR	0.95	0
1M with BAF	lamin A/C isoform 1 precursor [Homo sapiens], gi|125962|sp|P02545|LMNA_HUMAN Lamin-A/C (70 kDa lamin) (Renal carcinoma antigen NY-REN-32), gi|54035059|gb|AAH14507.1| Lamin A/C [Homo sapiens], gi|55957498|emb|CAI15522.1| lamin A/C [Homo sapiens], gi|190690113|gb|ACE86831.1| lamin A/C protein [synthetic construct], gi|190691485|gb|ACE87517.1| lamin A/C protein [synthetic construct] [MASS=74139]	gi|27436946,gi|57014043	74122.6	1	12	0.229	DLEDSLAR	0.927	gi|74220835
1M with BAF	lamin A/C isoform 1 precursor [Homo sapiens], gi|125962|sp|P02545|LMNA_HUMAN Lamin-A/C (70 kDa lamin) (Renal carcinoma antigen NY-REN-32), gi|54035059|gb|AAH14507.1| Lamin A/C [Homo sapiens], gi|55957498|emb|CAI15522.1| lamin A/C [Homo sapiens], gi|190690113|gb|ACE86831.1| lamin A/C protein [synthetic construct], gi|190691485|gb|ACE87517.1| lamin A/C protein [synthetic construct] [MASS=74139]	gi|27436946,gi|57014043	74122.6	1	12	0.229	EELDFQK	0.95	gi|74220835
1M with BAF	lamin A/C isoform 1 precursor [Homo sapiens], gi|125962|sp|P02545|LMNA_HUMAN Lamin-A/C (70 kDa lamin) (Renal carcinoma antigen NY-REN-32), gi|54035059|gb|AAH14507.1| Lamin A/C [Homo sapiens], gi|55957498|emb|CAI15522.1| lamin A/C [Homo sapiens], gi|190690113|gb|ACE86831.1| lamin A/C protein [synthetic construct], gi|190691485|gb|ACE87517.1| lamin A/C protein [synthetic construct] [MASS=74139]	gi|27436946,gi|57014043	74122.6	1	12	0.229	ITESEEVVSR	0.95	gi|74220835
1M with BAF	lamin A/C isoform 1 precursor [Homo sapiens], gi|125962|sp|P02545|LMNA_HUMAN Lamin-A/C (70 kDa lamin) (Renal carcinoma antigen NY-REN-32), gi|54035059|gb|AAH14507.1| Lamin A/C [Homo sapiens], gi|55957498|emb|CAI15522.1| lamin A/C [Homo sapiens], gi|190690113|gb|ACE86831.1| lamin A/C protein [synthetic construct], gi|190691485|gb|ACE87517.1| lamin A/C protein [synthetic construct] [MASS=74139]	gi|27436946,gi|57014043	74122.6	1	12	0.229	LEAALGEAK	0.749	gi|74220835
1M with BAF	lamin A/C isoform 1 precursor [Homo sapiens], gi|125962|sp|P02545|LMNA_HUMAN Lamin-A/C (70 kDa lamin) (Renal carcinoma antigen NY-REN-32), gi|54035059|gb|AAH14507.1| Lamin A/C [Homo sapiens], gi|55957498|emb|CAI15522.1| lamin A/C [Homo sapiens], gi|190690113|gb|ACE86831.1| lamin A/C protein [synthetic construct], gi|190691485|gb|ACE87517.1| lamin A/C protein [synthetic construct] [MASS=74139]	gi|27436946,gi|57014043	74122.6	1	12	0.229	MQQQLDEYQELLDIK	0.95	gi|74220835
1M with BAF	lamin A/C isoform 1 precursor [Homo sapiens], gi|125962|sp|P02545|LMNA_HUMAN Lamin-A/C (70 kDa lamin) (Renal carcinoma antigen NY-REN-32), gi|54035059|gb|AAH14507.1| Lamin A/C [Homo sapiens], gi|55957498|emb|CAI15522.1| lamin A/C [Homo sapiens], gi|190690113|gb|ACE86831.1| lamin A/C protein [synthetic construct], gi|190691485|gb|ACE87517.1| lamin A/C protein [synthetic construct] [MASS=74139]	gi|27436946,gi|57014043	74122.6	1	12	0.229	NSNLVGAAHEELQQSR	0.95	gi|74220835
1M with BAF	lamin A/C isoform 1 precursor [Homo sapiens], gi|125962|sp|P02545|LMNA_HUMAN Lamin-A/C (70 kDa lamin) (Renal carcinoma antigen NY-REN-32), gi|54035059|gb|AAH14507.1| Lamin A/C [Homo sapiens], gi|55957498|emb|CAI15522.1| lamin A/C [Homo sapiens], gi|190690113|gb|ACE86831.1| lamin A/C protein [synthetic construct], gi|190691485|gb|ACE87517.1| lamin A/C protein [synthetic construct] [MASS=74139]	gi|27436946,gi|57014043	74122.6	1	12	0.229	QLQDEMLR	0.945	gi|74220835
1M with BAF	lamin A/C isoform 1 precursor [Homo sapiens], gi|125962|sp|P02545|LMNA_HUMAN Lamin-A/C (70 kDa lamin) (Renal carcinoma antigen NY-REN-32), gi|54035059|gb|AAH14507.1| Lamin A/C [Homo sapiens], gi|55957498|emb|CAI15522.1| lamin A/C [Homo sapiens], gi|190690113|gb|ACE86831.1| lamin A/C protein [synthetic construct], gi|190691485|gb|ACE87517.1| lamin A/C protein [synthetic construct] [MASS=74139]	gi|27436946,gi|57014043	74122.6	1	12	0.229	SNEDQSMGNWQIK	0.95	0
1M with BAF	lamin A/C isoform 1 precursor [Homo sapiens], gi|125962|sp|P02545|LMNA_HUMAN Lamin-A/C (70 kDa lamin) (Renal carcinoma antigen NY-REN-32), gi|54035059|gb|AAH14507.1| Lamin A/C [Homo sapiens], gi|55957498|emb|CAI15522.1| lamin A/C [Homo sapiens], gi|190690113|gb|ACE86831.1| lamin A/C protein [synthetic construct], gi|190691485|gb|ACE87517.1| lamin A/C protein [synthetic construct] [MASS=74139]	gi|27436946,gi|57014043	74122.6	1	12	0.229	TALINSTGEEVAMR	0.95	gi|74220835
1M with BAF	lamin A/C isoform 1 precursor [Homo sapiens], gi|125962|sp|P02545|LMNA_HUMAN Lamin-A/C (70 kDa lamin) (Renal carcinoma antigen NY-REN-32), gi|54035059|gb|AAH14507.1| Lamin A/C [Homo sapiens], gi|55957498|emb|CAI15522.1| lamin A/C [Homo sapiens], gi|190690113|gb|ACE86831.1| lamin A/C protein [synthetic construct], gi|190691485|gb|ACE87517.1| lamin A/C protein [synthetic construct] [MASS=74139]	gi|27436946,gi|57014043	74122.6	1	12	0.229	TVLCGTCGQPADK	0.95	0
1M with BAF	retinoblastoma-binding protein mRbAp48.	gi|1016275,gi|109001624,gi|109475540,gi|5032027,gi|55725402,gi|73949950,gi|88930444,gi|90101524	46140.5	0.998	2	0.0927	EAAFDDAVEER	0.95	0
1M with BAF	retinoblastoma-binding protein mRbAp48.	gi|1016275,gi|109001624,gi|109475540,gi|5032027,gi|55725402,gi|73949950,gi|88930444,gi|90101524	46140.5	0.998	2	0.0927	IGEEQSPEDAEDGPPELLFIHGGHTAK	0.95	0
1M with BAF	DNA-repair protein complementing XP-C cells (Xeroderma pigmentosum group C-complementing protein) (p125), gi|475157|dbj|BAA04651.1| XP-C repair complementing protein (p125) [Homo sapiens], gi|9438106|gb|AAF87574.1| xeroderma pigmentosum group C protein [Homo sapiens] [MASS=105980]	gi|1722884,gi|20127460,gi|229080,gi|37996,gi|62897247	105965	1	3	0.0447	HMDQPLPTAIGLYK	0.95	0
1M with BAF	DNA-repair protein complementing XP-C cells (Xeroderma pigmentosum group C-complementing protein) (p125), gi|475157|dbj|BAA04651.1| XP-C repair complementing protein (p125) [Homo sapiens], gi|9438106|gb|AAF87574.1| xeroderma pigmentosum group C protein [Homo sapiens] [MASS=105980]	gi|1722884,gi|20127460,gi|229080,gi|37996,gi|62897247	105965	1	3	0.0447	ILAASWPQNR	0.827	0
1M with BAF	DNA-repair protein complementing XP-C cells (Xeroderma pigmentosum group C-complementing protein) (p125), gi|475157|dbj|BAA04651.1| XP-C repair complementing protein (p125) [Homo sapiens], gi|9438106|gb|AAF87574.1| xeroderma pigmentosum group C protein [Homo sapiens] [MASS=105980]	gi|1722884,gi|20127460,gi|229080,gi|37996,gi|62897247	105965	1	3	0.0447	SIAGIDQWLEVFCEQEEK	0.95	0
1M with BAF	poly (ADP-ribose) polymerase family, member 1 [Homo sapiens], gi|130781|sp|P09874|PARP1_HUMAN Poly [ADP-ribose] polymerase 1 (PARP-1) (ADPRT) (NAD(+) ADP-ribosyltransferase 1) (Poly[ADP-ribose] synthetase 1), gi|21693601|gb|AAM75364.1|AF524947_1 ADP-ribosyltransferase (NAD+; poly (ADP-ribose) polymerase) [Homo sapiens], gi|178190|gb|AAA51663.1| NAD+ ADP-ribosyltransferase, gi|55663671|emb|CAH7021…	gi|156523968	113070	1	11	0.169	AMVEYEIDLQK	0.942	gi|178152
1M with BAF	poly (ADP-ribose) polymerase family, member 1 [Homo sapiens], gi|130781|sp|P09874|PARP1_HUMAN Poly [ADP-ribose] polymerase 1 (PARP-1) (ADPRT) (NAD(+) ADP-ribosyltransferase 1) (Poly[ADP-ribose] synthetase 1), gi|21693601|gb|AAM75364.1|AF524947_1 ADP-ribosyltransferase (NAD+; poly (ADP-ribose) polymerase) [Homo sapiens], gi|178190|gb|AAA51663.1| NAD+ ADP-ribosyltransferase, gi|55663671|emb|CAH7021…	gi|156523968	113070	1	11	0.169	ASLCISTK	0.95	0
1M with BAF	poly (ADP-ribose) polymerase family, member 1 [Homo sapiens], gi|130781|sp|P09874|PARP1_HUMAN Poly [ADP-ribose] polymerase 1 (PARP-1) (ADPRT) (NAD(+) ADP-ribosyltransferase 1) (Poly[ADP-ribose] synthetase 1), gi|21693601|gb|AAM75364.1|AF524947_1 ADP-ribosyltransferase (NAD+; poly (ADP-ribose) polymerase) [Homo sapiens], gi|178190|gb|AAA51663.1| NAD+ ADP-ribosyltransferase, gi|55663671|emb|CAH7021…	gi|156523968	113070	1	11	0.169	GGAAVDPDSGLEHSAHVLEK	0.95	gi|178152
1M with BAF	poly (ADP-ribose) polymerase family, member 1 [Homo sapiens], gi|130781|sp|P09874|PARP1_HUMAN Poly [ADP-ribose] polymerase 1 (PARP-1) (ADPRT) (NAD(+) ADP-ribosyltransferase 1) (Poly[ADP-ribose] synthetase 1), gi|21693601|gb|AAM75364.1|AF524947_1 ADP-ribosyltransferase (NAD+; poly (ADP-ribose) polymerase) [Homo sapiens], gi|178190|gb|AAA51663.1| NAD+ ADP-ribosyltransferase, gi|55663671|emb|CAH7021…	gi|156523968	113070	1	11	0.169	GGSDDSSKDPIDVNYEK	0.95	gi|178152
1M with BAF	poly (ADP-ribose) polymerase family, member 1 [Homo sapiens], gi|130781|sp|P09874|PARP1_HUMAN Poly [ADP-ribose] polymerase 1 (PARP-1) (ADPRT) (NAD(+) ADP-ribosyltransferase 1) (Poly[ADP-ribose] synthetase 1), gi|21693601|gb|AAM75364.1|AF524947_1 ADP-ribosyltransferase (NAD+; poly (ADP-ribose) polymerase) [Homo sapiens], gi|178190|gb|AAA51663.1| NAD+ ADP-ribosyltransferase, gi|55663671|emb|CAH7021…	gi|156523968	113070	1	11	0.169	HPDVEVDGFSELR	0.95	0
1M with BAF	poly (ADP-ribose) polymerase family, member 1 [Homo sapiens], gi|130781|sp|P09874|PARP1_HUMAN Poly [ADP-ribose] polymerase 1 (PARP-1) (ADPRT) (NAD(+) ADP-ribosyltransferase 1) (Poly[ADP-ribose] synthetase 1), gi|21693601|gb|AAM75364.1|AF524947_1 ADP-ribosyltransferase (NAD+; poly (ADP-ribose) polymerase) [Homo sapiens], gi|178190|gb|AAA51663.1| NAD+ ADP-ribosyltransferase, gi|55663671|emb|CAH7021…	gi|156523968	113070	1	11	0.169	KPPLLNNADSVQAK	0.808	gi|178152
1M with BAF	poly (ADP-ribose) polymerase family, member 1 [Homo sapiens], gi|130781|sp|P09874|PARP1_HUMAN Poly [ADP-ribose] polymerase 1 (PARP-1) (ADPRT) (NAD(+) ADP-ribosyltransferase 1) (Poly[ADP-ribose] synthetase 1), gi|21693601|gb|AAM75364.1|AF524947_1 ADP-ribosyltransferase (NAD+; poly (ADP-ribose) polymerase) [Homo sapiens], gi|178190|gb|AAA51663.1| NAD+ ADP-ribosyltransferase, gi|55663671|emb|CAH7021…	gi|156523968	113070	1	11	0.169	LQLLEDDKENR	0.505	gi|178152
1M with BAF	poly (ADP-ribose) polymerase family, member 1 [Homo sapiens], gi|130781|sp|P09874|PARP1_HUMAN Poly [ADP-ribose] polymerase 1 (PARP-1) (ADPRT) (NAD(+) ADP-ribosyltransferase 1) (Poly[ADP-ribose] synthetase 1), gi|21693601|gb|AAM75364.1|AF524947_1 ADP-ribosyltransferase (NAD+; poly (ADP-ribose) polymerase) [Homo sapiens], gi|178190|gb|AAA51663.1| NAD+ ADP-ribosyltransferase, gi|55663671|emb|CAH7021…	gi|156523968	113070	1	11	0.169	MVDPEKPQLGMIDR	0.95	0
1M with BAF	poly (ADP-ribose) polymerase family, member 1 [Homo sapiens], gi|130781|sp|P09874|PARP1_HUMAN Poly [ADP-ribose] polymerase 1 (PARP-1) (ADPRT) (NAD(+) ADP-ribosyltransferase 1) (Poly[ADP-ribose] synthetase 1), gi|21693601|gb|AAM75364.1|AF524947_1 ADP-ribosyltransferase (NAD+; poly (ADP-ribose) polymerase) [Homo sapiens], gi|178190|gb|AAA51663.1| NAD+ ADP-ribosyltransferase, gi|55663671|emb|CAH7021…	gi|156523968	113070	1	11	0.169	SANYCHTSQGDPIGLILLGEVALGNMYELK	0.95	gi|178152
1M with BAF	poly (ADP-ribose) polymerase family, member 1 [Homo sapiens], gi|130781|sp|P09874|PARP1_HUMAN Poly [ADP-ribose] polymerase 1 (PARP-1) (ADPRT) (NAD(+) ADP-ribosyltransferase 1) (Poly[ADP-ribose] synthetase 1), gi|21693601|gb|AAM75364.1|AF524947_1 ADP-ribosyltransferase (NAD+; poly (ADP-ribose) polymerase) [Homo sapiens], gi|178190|gb|AAA51663.1| NAD+ ADP-ribosyltransferase, gi|55663671|emb|CAH7021…	gi|156523968	113070	1	11	0.169	VEMLDNLLDIEVAYSLLR	0.95	gi|178152
1M with BAF	poly (ADP-ribose) polymerase family, member 1 [Homo sapiens], gi|130781|sp|P09874|PARP1_HUMAN Poly [ADP-ribose] polymerase 1 (PARP-1) (ADPRT) (NAD(+) ADP-ribosyltransferase 1) (Poly[ADP-ribose] synthetase 1), gi|21693601|gb|AAM75364.1|AF524947_1 ADP-ribosyltransferase (NAD+; poly (ADP-ribose) polymerase) [Homo sapiens], gi|178190|gb|AAA51663.1| NAD+ ADP-ribosyltransferase, gi|55663671|emb|CAH7021…	gi|156523968	113070	1	11	0.169	VVSEDFLQDVSASTK	0.95	gi|178152
1M with BAF	PREDICTED: similar to Histone H1.5 (Histone H1a) [Macaca mulatta].	gi|109070064,gi|4885381,gi|55626268	22563.7	0.984	2	0.159	ALAAGGYDVEK	0.95	0
1M with BAF	PREDICTED: similar to Histone H1.5 (Histone H1a) [Macaca mulatta].	gi|109070064,gi|4885381,gi|55626268	22563.7	0.984	2	0.159	NGLSLAALK	0.95	gi|57110429,gi|74004254
1M with BAF	PREDICTED: similar to Histone H1.5 (Histone H1a) [Macaca mulatta].	gi|109070064,gi|4885381,gi|55626268	22563.7	0.984	2	0.159	SETAPAETATPAPVEK	0.674	0
1M with BAF	type I keratin 16; K16 [Homo sapiens]	gi|1195531,gi|24430192	51251	1	6	0.26	ALEEANADLEVK	0.95	gi|15431310,gi|386848,gi|12803709
1M with BAF	type I keratin 16; K16 [Homo sapiens]	gi|1195531,gi|24430192	51251	1	6	0.26	APSTYGGGLSVSSR	0.95	0
1M with BAF	type I keratin 16; K16 [Homo sapiens]	gi|1195531,gi|24430192	51251	1	6	0.26	DAETWFLSK	0.95	0
1M with BAF	type I keratin 16; K16 [Homo sapiens]	gi|1195531,gi|24430192	51251	1	6	0.26	EVASNSELVQSSR	0.95	0
1M with BAF	type I keratin 16; K16 [Homo sapiens]	gi|1195531,gi|24430192	51251	1	6	0.26	GQTGGDVNVEMDAAPGVDLSR	0.95	0
1M with BAF	type I keratin 16; K16 [Homo sapiens]	gi|1195531,gi|24430192	51251	1	6	0.26	ILNEMR	0.95	gi|15431310,gi|386848,gi|21754583,gi|4557701,gi|12803709
1M with BAF	type I keratin 16; K16 [Homo sapiens]	gi|1195531,gi|24430192	51251	1	6	0.26	LASYLDK	0.95	gi|55956899,gi|81175178,gi|15431310,gi|386848,gi|28317,gi|21961605,gi|21754583,gi|4557701,gi|12803709
1M with BAF	type I keratin 16; K16 [Homo sapiens]	gi|1195531,gi|24430192	51251	1	6	0.26	LEQEIATYR	0.95	gi|15431310,gi|386848,gi|21754583,gi|4557701,gi|12803709
1M with BAF	type I keratin 16; K16 [Homo sapiens]	gi|1195531,gi|24430192	51251	1	6	0.26	NHEEEMLALR	0.641	0
1M with BAF	type I keratin 16; K16 [Homo sapiens]	gi|1195531,gi|24430192	51251	1	6	0.26	TDLEMQIEGLK	0.95	0
1M with BAF	type I keratin 16; K16 [Homo sapiens]	gi|1195531,gi|24430192	51251	1	6	0.26	TRLEQEIATYR	0.95	gi|15431310,gi|386848,gi|21754583,gi|4557701,gi|12803709
1M with BAF	type I keratin 16; K16 [Homo sapiens]	gi|1195531,gi|24430192	51251	1	6	0.26	VLDELTLAR	0.95	gi|15431310,gi|386848,gi|21754583,gi|4557701,gi|12803709
1M with BAF	PREDICTED: similar to keratin 1 isoform 7 [Macaca mulatta]	gi|109096823,gi|109096825,gi|109096827,gi|109096829	61858.8	0.998	2	0.294	AEAESLYQSK	0.655	gi|11935049
1M with BAF	PREDICTED: similar to keratin 1 isoform 7 [Macaca mulatta]	gi|109096823,gi|109096825,gi|109096827,gi|109096829	61858.8	0.998	2	0.294	DYQELMNTK	0.95	gi|11935049,gi|81891716
1M with BAF	PREDICTED: similar to keratin 1 isoform 7 [Macaca mulatta]	gi|109096823,gi|109096825,gi|109096827,gi|109096829	61858.8	0.998	2	0.294	FLEQQNQVLQTK	0.906	gi|11935049,gi|81891716,gi|47132620,gi|547754
1M with BAF	PREDICTED: similar to keratin 1 isoform 7 [Macaca mulatta]	gi|109096823,gi|109096825,gi|109096827,gi|109096829	61858.8	0.998	2	0.294	FSSCGGGGGGSFGAGGGFGSR	0.95	0
1M with BAF	PREDICTED: similar to keratin 1 isoform 7 [Macaca mulatta]	gi|109096823,gi|109096825,gi|109096827,gi|109096829	61858.8	0.998	2	0.294	GSYGSGGGSYGSGGGGGGHGSYGSGSSSGGYR	0.95	0
1M with BAF	PREDICTED: similar to keratin 1 isoform 7 [Macaca mulatta]	gi|109096823,gi|109096825,gi|109096827,gi|109096829	61858.8	0.998	2	0.294	IEISELNR	0.905	gi|11935049,gi|47132620,gi|547754
1M with BAF	PREDICTED: similar to keratin 1 isoform 7 [Macaca mulatta]	gi|109096823,gi|109096825,gi|109096827,gi|109096829	61858.8	0.998	2	0.294	LALDLEIATYR	0.95	gi|11935049
1M with BAF	PREDICTED: similar to keratin 1 isoform 7 [Macaca mulatta]	gi|109096823,gi|109096825,gi|109096827,gi|109096829	61858.8	0.998	2	0.294	LNDLEDALQQAK	0.95	gi|11935049
1M with BAF	PREDICTED: similar to keratin 1 isoform 7 [Macaca mulatta]	gi|109096823,gi|109096825,gi|109096827,gi|109096829	61858.8	0.998	2	0.294	NMQDMVEDYR	0.95	gi|11935049
1M with BAF	PREDICTED: similar to keratin 1 isoform 7 [Macaca mulatta]	gi|109096823,gi|109096825,gi|109096827,gi|109096829	61858.8	0.998	2	0.294	SKAEAESLYQSK	0.95	gi|11935049
1M with BAF	PREDICTED: similar to keratin 1 isoform 7 [Macaca mulatta]	gi|109096823,gi|109096825,gi|109096827,gi|109096829	61858.8	0.998	2	0.294	SLDLDSIIAEVK	0.95	gi|11935049
1M with BAF	PREDICTED: similar to keratin 1 isoform 7 [Macaca mulatta]	gi|109096823,gi|109096825,gi|109096827,gi|109096829	61858.8	0.998	2	0.294	SLVNLGGSK	0.95	gi|11935049
1M with BAF	PREDICTED: similar to keratin 1 isoform 7 [Macaca mulatta]	gi|109096823,gi|109096825,gi|109096827,gi|109096829	61858.8	0.998	2	0.294	THNLEPYFESFINNLR	0.95	gi|11935049
1M with BAF	PREDICTED: similar to keratin 1 isoform 7 [Macaca mulatta]	gi|109096823,gi|109096825,gi|109096827,gi|109096829	61858.8	0.998	2	0.294	YEELQITAGR	0.95	gi|109096781,gi|11935049
1M with BAF	dpy-30-like protein [Homo sapiens], gi|118150944|ref|NP_001071384.1| dpy-30-like protein [Bos taurus], gi|109102578|ref|XP_001105547.1| PREDICTED: similar to dpy-30-like protein isoform 1 [Macaca mulatta], gi|109102580|ref|XP_001105621.1| PREDICTED: similar to dpy-30-like protein isoform 2 [Macaca mulatta], gi|114576875|ref|XP_001164263.1| PREDICTED: dpy-30-like protein isoform 1 [Pan troglodytes…	gi|14211889,gi|14916554,gi|57098223	11194.8	0.998	2	0.364	AYLDQTVVPILLQGLAVLAK	0.95	0
1M with BAF	dpy-30-like protein [Homo sapiens], gi|118150944|ref|NP_001071384.1| dpy-30-like protein [Bos taurus], gi|109102578|ref|XP_001105547.1| PREDICTED: similar to dpy-30-like protein isoform 1 [Macaca mulatta], gi|109102580|ref|XP_001105621.1| PREDICTED: similar to dpy-30-like protein isoform 2 [Macaca mulatta], gi|114576875|ref|XP_001164263.1| PREDICTED: dpy-30-like protein isoform 1 [Pan troglodytes…	gi|14211889,gi|14916554,gi|57098223	11194.8	0.998	2	0.364	ERPPNPIEFLASYLLK	0.95	0
1M with BAF	breakpoint cluster region protein 1 [Homo sapiens]	gi|10120888,gi|3002951,gi|4502389	10000.3	1	5	0.483	AYVVLGQFLVLK	0.95	gi|88953904
1M with BAF	breakpoint cluster region protein 1 [Homo sapiens]	gi|10120888,gi|3002951,gi|4502389	10000.3	1	5	0.483	DEDLFR	0.654	0
1M with BAF	breakpoint cluster region protein 1 [Homo sapiens]	gi|10120888,gi|3002951,gi|4502389	10000.3	1	5	0.483	DFVAEPXGEKPVGSLAGIGEVLGK	0.95	0
1M with BAF	breakpoint cluster region protein 1 [Homo sapiens]	gi|10120888,gi|3002951,gi|4502389	10000.3	1	5	0.483	KDEDLFR	0.95	0
1M with BAF	PREDICTED: similar to structure specific recognition protein 1	gi|109106294,gi|111154063,gi|27502780,gi|4507241,gi|54020668,gi|60552474	81059.6	1	3	0.0705	FDEISFVNFAR	0.95	0
1M with BAF	PREDICTED: similar to structure specific recognition protein 1	gi|109106294,gi|111154063,gi|27502780,gi|4507241,gi|54020668,gi|60552474	81059.6	1	3	0.0705	FGGQLLSFDIGDQPVFEIPLSNVSQCTTGK	0.95	0
1M with BAF	PREDICTED: similar to structure specific recognition protein 1	gi|109106294,gi|111154063,gi|27502780,gi|4507241,gi|54020668,gi|60552474	81059.6	1	3	0.0705	SFDFEIETK	0.95	0
1M with BAF	unnamed protein product [Homo sapiens].	gi|21754583,gi|4557701	48088.7	1	3	0.238	ALEEANTELEVK	0.95	0
1M with BAF	unnamed protein product [Homo sapiens].	gi|21754583,gi|4557701	48088.7	1	3	0.238	ASLEGNLAETENR	0.95	0
1M with BAF	unnamed protein product [Homo sapiens].	gi|21754583,gi|4557701	48088.7	1	3	0.238	DAEDWFFSK	0.95	0
1M with BAF	unnamed protein product [Homo sapiens].	gi|21754583,gi|4557701	48088.7	1	3	0.238	EVATNSELVQSGK	0.95	gi|15431310,gi|386848,gi|12803709
1M with BAF	unnamed protein product [Homo sapiens].	gi|21754583,gi|4557701	48088.7	1	3	0.238	ILLDVK	0.859	gi|15431310,gi|386848,gi|12803709
1M with BAF	unnamed protein product [Homo sapiens].	gi|21754583,gi|4557701	48088.7	1	3	0.238	ILNEMR	0.95	gi|24430192,gi|15431310,gi|1195531,gi|386848,gi|12803709
1M with BAF	unnamed protein product [Homo sapiens].	gi|21754583,gi|4557701	48088.7	1	3	0.238	LASYLDK	0.95	gi|55956899,gi|81175178,gi|24430192,gi|15431310,gi|1195531,gi|386848,gi|28317,gi|21961605,gi|12803709
1M with BAF	unnamed protein product [Homo sapiens].	gi|21754583,gi|4557701	48088.7	1	3	0.238	LEQEIATYR	0.95	gi|24430192,gi|15431310,gi|1195531,gi|386848,gi|12803709
1M with BAF	unnamed protein product [Homo sapiens].	gi|21754583,gi|4557701	48088.7	1	3	0.238	NHEEEMNALR	0.825	gi|15431310,gi|386848,gi|12803709
1M with BAF	unnamed protein product [Homo sapiens].	gi|21754583,gi|4557701	48088.7	1	3	0.238	SEISELR	0.935	gi|15431310,gi|386848,gi|12803709
1M with BAF	unnamed protein product [Homo sapiens].	gi|21754583,gi|4557701	48088.7	1	3	0.238	TRLEQEIATYR	0.95	gi|24430192,gi|15431310,gi|1195531,gi|386848,gi|12803709
1M with BAF	unnamed protein product [Homo sapiens].	gi|21754583,gi|4557701	48088.7	1	3	0.238	VLDELTLAR	0.95	gi|24430192,gi|15431310,gi|1195531,gi|386848,gi|12803709
1M with BAF	keratin 1 [Homo sapiens].	gi|11935049	66050.3	1	16	0.354	AEAESLYQSK	0.655	gi|109096823,gi|109096825,gi|109096827,gi|109096829
1M with BAF	keratin 1 [Homo sapiens].	gi|11935049	66050.3	1	16	0.354	DYQELMNTK	0.95	gi|109096823,gi|109096825,gi|81891716,gi|109096827,gi|109096829
1M with BAF	keratin 1 [Homo sapiens].	gi|11935049	66050.3	1	16	0.354	FLEQQNQVLQTK	0.906	gi|109096823,gi|109096825,gi|81891716,gi|47132620,gi|547754,gi|109096827,gi|109096829
1M with BAF	keratin 1 [Homo sapiens].	gi|11935049	66050.3	1	16	0.354	FSSCGGGGGSFGAGGGFGSR	0.95	0
1M with BAF	keratin 1 [Homo sapiens].	gi|11935049	66050.3	1	16	0.354	GGGGGGYGSGGSSYGSGGGSYGSGGGGGGGR	0.95	0
1M with BAF	keratin 1 [Homo sapiens].	gi|11935049	66050.3	1	16	0.354	GSYGSGGSSYGSGGGSYGSGGGGGGHGSYGSGSSSGGYR	0.95	0
1M with BAF	keratin 1 [Homo sapiens].	gi|11935049	66050.3	1	16	0.354	IEISELNR	0.905	gi|109096823,gi|109096825,gi|47132620,gi|547754,gi|109096827,gi|109096829
1M with BAF	keratin 1 [Homo sapiens].	gi|11935049	66050.3	1	16	0.354	LALDLEIATYR	0.95	gi|109096823,gi|109096825,gi|109096827,gi|109096829
1M with BAF	keratin 1 [Homo sapiens].	gi|11935049	66050.3	1	16	0.354	LNDLEDALQQAK	0.95	gi|109096823,gi|109096825,gi|109096827,gi|109096829
1M with BAF	keratin 1 [Homo sapiens].	gi|11935049	66050.3	1	16	0.354	NMQDMVEDYR	0.95	gi|109096823,gi|109096825,gi|109096827,gi|109096829
1M with BAF	keratin 1 [Homo sapiens].	gi|11935049	66050.3	1	16	0.354	SGGGFSSGSAGIINYQR	0.95	0
1M with BAF	keratin 1 [Homo sapiens].	gi|11935049	66050.3	1	16	0.354	SKAEAESLYQSK	0.95	gi|109096823,gi|109096825,gi|109096827,gi|109096829
1M with BAF	keratin 1 [Homo sapiens].	gi|11935049	66050.3	1	16	0.354	SLDLDSIIAEVK	0.95	gi|109096823,gi|109096825,gi|109096827,gi|109096829
1M with BAF	keratin 1 [Homo sapiens].	gi|11935049	66050.3	1	16	0.354	SLVNLGGSK	0.95	gi|109096823,gi|109096825,gi|109096827,gi|109096829
1M with BAF	keratin 1 [Homo sapiens].	gi|11935049	66050.3	1	16	0.354	THNLEPYFESFINNLR	0.95	gi|109096823,gi|109096825,gi|109096827,gi|109096829
1M with BAF	keratin 1 [Homo sapiens].	gi|11935049	66050.3	1	16	0.354	YEELQITAGR	0.95	gi|109096781,gi|109096823,gi|109096825,gi|109096827,gi|109096829
1M with BAF	lamin B1 [Homo sapiens], gi|125953|sp|P20700|LMNB1_HUMAN Lamin-B1, gi|307106|gb|AAA36162.1| lamin B, gi|576840|gb|AAC37575.1| lamin B1 [Homo sapiens], gi|74354337|gb|AAI03724.1| Lamin B1 [Homo sapiens], gi|119569231|gb|EAW48846.1| lamin B1, isoform CRA_b [Homo sapiens], gi|189069155|dbj|BAG35493.1| unnamed protein product [Homo sapiens] [MASS=66408]	gi|5031877	66391.6	0.979	2	0.0614	AEHDQLLLNYAK	0.579	0
1M with BAF	lamin B1 [Homo sapiens], gi|125953|sp|P20700|LMNB1_HUMAN Lamin-B1, gi|307106|gb|AAA36162.1| lamin B, gi|576840|gb|AAC37575.1| lamin B1 [Homo sapiens], gi|74354337|gb|AAI03724.1| Lamin B1 [Homo sapiens], gi|119569231|gb|EAW48846.1| lamin B1, isoform CRA_b [Homo sapiens], gi|189069155|dbj|BAG35493.1| unnamed protein product [Homo sapiens] [MASS=66408]	gi|5031877	66391.6	0.979	2	0.0614	SLEGDLEDLKDQIAQLEASLAAAK	0.95	0
1M with BAF	desmoplakin isoform I [Homo sapiens], gi|115502381|sp|P15924|DESP_HUMAN Desmoplakin (DP) (250/210 kDa paraneoplastic pemphigus antigen), gi|3702136|emb|CAA19927.1| desmoplakin [Homo sapiens], gi|119575619|gb|EAW55215.1| desmoplakin [Homo sapiens] [MASS=331772]	gi|1147813,gi|181608,gi|58530840	331765	0.966	2	0.00766	LNDSILQATEQR	0.59	0
1M with BAF	desmoplakin isoform I [Homo sapiens], gi|115502381|sp|P15924|DESP_HUMAN Desmoplakin (DP) (250/210 kDa paraneoplastic pemphigus antigen), gi|3702136|emb|CAA19927.1| desmoplakin [Homo sapiens], gi|119575619|gb|EAW55215.1| desmoplakin [Homo sapiens] [MASS=331772]	gi|1147813,gi|181608,gi|58530840	331765	0.966	2	0.00766	QLLQEQESVK	0.917	0
1M with BAF	PREDICTED: keratin 6A isoform 18 [Macaca mulatta].	gi|109096781	59956.4	1	4	0.172	ADTLTDEINFLR	0.95	0
1M with BAF	PREDICTED: keratin 6A isoform 18 [Macaca mulatta].	gi|109096781	59956.4	1	4	0.172	AQYEEIAQR	0.95	gi|47132620,gi|547754
1M with BAF	PREDICTED: keratin 6A isoform 18 [Macaca mulatta].	gi|109096781	59956.4	1	4	0.172	FASFIDK	0.95	gi|18999435,gi|109096797,gi|81891716,gi|47132620,gi|109096795,gi|109096789,gi|547754,gi|109096793,gi|293686
1M with BAF	PREDICTED: keratin 6A isoform 18 [Macaca mulatta].	gi|109096781	59956.4	1	4	0.172	LALDVEIATYR	0.95	gi|18999435,gi|109096797,gi|47132620,gi|109096795,gi|109096789,gi|547754,gi|109096793,gi|293686
1M with BAF	PREDICTED: keratin 6A isoform 18 [Macaca mulatta].	gi|109096781	59956.4	1	4	0.172	NLDLDSIIAEVK	0.95	gi|18999435,gi|109096797,gi|47132620,gi|109096795,gi|109096789,gi|547754,gi|109096793
1M with BAF	PREDICTED: keratin 6A isoform 18 [Macaca mulatta].	gi|109096781	59956.4	1	4	0.172	QEIAEINR	0.857	gi|293686
1M with BAF	PREDICTED: keratin 6A isoform 18 [Macaca mulatta].	gi|109096781	59956.4	1	4	0.172	QLDSIVGER	0.95	gi|18999435,gi|109096797,gi|109096795,gi|109096789,gi|109096793
1M with BAF	PREDICTED: keratin 6A isoform 18 [Macaca mulatta].	gi|109096781	59956.4	1	4	0.172	SGFSSVSVSR	0.824	0
1M with BAF	PREDICTED: keratin 6A isoform 18 [Macaca mulatta].	gi|109096781	59956.4	1	4	0.172	SLYGLGGSK	0.95	0
1M with BAF	PREDICTED: keratin 6A isoform 18 [Macaca mulatta].	gi|109096781	59956.4	1	4	0.172	YEELQITAGR	0.95	gi|11935049,gi|109096823,gi|109096825,gi|109096827,gi|109096829
1M with BAF	PREDICTED: thymopoietin isoform 2 [Macaca mulatta].	gi|109098344	75457.9	1	4	0.0878	ALEESESSKLISPPLAQAIR	0.95	0
1M with BAF	PREDICTED: thymopoietin isoform 2 [Macaca mulatta].	gi|109098344	75457.9	1	4	0.0878	SELVANNVTLPAGEQR	0.95	0
1M with BAF	PREDICTED: thymopoietin isoform 2 [Macaca mulatta].	gi|109098344	75457.9	1	4	0.0878	SHISDQSPLSSK	0.8	0
1M with BAF	PREDICTED: thymopoietin isoform 2 [Macaca mulatta].	gi|109098344	75457.9	1	4	0.0878	YGVNPGPIVGTTR	0.95	0
1M with BAF	PREDICTED: keratin 5 isoform 15 [Macaca mulatta]	gi|109096789,gi|109096793,gi|109096795,gi|109096797,gi|18999435	62361.6	1	11	0.197	FASFIDK	0.95	gi|109096781,gi|81891716,gi|47132620,gi|547754,gi|293686
1M with BAF	PREDICTED: keratin 5 isoform 15 [Macaca mulatta]	gi|109096789,gi|109096793,gi|109096795,gi|109096797,gi|18999435	62361.6	1	11	0.197	GLGVGFGSGGGSSSSVK	0.95	0
1M with BAF	PREDICTED: keratin 5 isoform 15 [Macaca mulatta]	gi|109096789,gi|109096793,gi|109096795,gi|109096797,gi|18999435	62361.6	1	11	0.197	ISISTSGGSFR	0.95	0
1M with BAF	PREDICTED: keratin 5 isoform 15 [Macaca mulatta]	gi|109096789,gi|109096793,gi|109096795,gi|109096797,gi|18999435	62361.6	1	11	0.197	KQCANLQNAIADAEQR	0.755	0
1M with BAF	PREDICTED: keratin 5 isoform 15 [Macaca mulatta]	gi|109096789,gi|109096793,gi|109096795,gi|109096797,gi|18999435	62361.6	1	11	0.197	LAELEEALQK	0.95	0
1M with BAF	PREDICTED: keratin 5 isoform 15 [Macaca mulatta]	gi|109096789,gi|109096793,gi|109096795,gi|109096797,gi|18999435	62361.6	1	11	0.197	LALDVEIATYR	0.95	gi|109096781,gi|47132620,gi|547754,gi|293686
1M with BAF	PREDICTED: keratin 5 isoform 15 [Macaca mulatta]	gi|109096789,gi|109096793,gi|109096795,gi|109096797,gi|18999435	62361.6	1	11	0.197	NLDLDSIIAEVK	0.95	gi|109096781,gi|47132620,gi|547754
1M with BAF	PREDICTED: keratin 5 isoform 15 [Macaca mulatta]	gi|109096789,gi|109096793,gi|109096795,gi|109096797,gi|18999435	62361.6	1	11	0.197	QCANLQNAIADAEQR	0.95	0
1M with BAF	PREDICTED: keratin 5 isoform 15 [Macaca mulatta]	gi|109096789,gi|109096793,gi|109096795,gi|109096797,gi|18999435	62361.6	1	11	0.197	QLDSIVGER	0.95	gi|109096781
1M with BAF	PREDICTED: keratin 5 isoform 15 [Macaca mulatta]	gi|109096789,gi|109096793,gi|109096795,gi|109096797,gi|18999435	62361.6	1	11	0.197	SFSTASAITPSVSR	0.934	0
1M with BAF	PREDICTED: keratin 5 isoform 15 [Macaca mulatta]	gi|109096789,gi|109096793,gi|109096795,gi|109096797,gi|18999435	62361.6	1	11	0.197	SLYNLGGSK	0.95	0
1M with BAF	H2A histone family, member Y isoform 1 [Homo sapiens].	gi|20336746,gi|32492946,gi|3493529,gi|4758496,gi|63100748,gi|73971330,gi|93141018	39472.7	1	5	0.156	AGVIFPVGR	0.95	0
1M with BAF	H2A histone family, member Y isoform 1 [Homo sapiens].	gi|20336746,gi|32492946,gi|3493529,gi|4758496,gi|63100748,gi|73971330,gi|93141018	39472.7	1	5	0.156	GKLEAIITPPPAK	0.95	0
1M with BAF	H2A histone family, member Y isoform 1 [Homo sapiens].	gi|20336746,gi|32492946,gi|3493529,gi|4758496,gi|63100748,gi|73971330,gi|93141018	39472.7	1	5	0.156	NCLALADDK	0.95	0
1M with BAF	H2A histone family, member Y isoform 1 [Homo sapiens].	gi|20336746,gi|32492946,gi|3493529,gi|4758496,gi|63100748,gi|73971330,gi|93141018	39472.7	1	5	0.156	NGPLEVAGAAVSAGHGLPAK	0.95	0
1M with BAF	H2A histone family, member Y isoform 1 [Homo sapiens].	gi|20336746,gi|32492946,gi|3493529,gi|4758496,gi|63100748,gi|73971330,gi|93141018	39472.7	1	5	0.156	SLFLGQK	0.535	0
1M with BAF	PREDICTED: similar to Actin, cytoplasmic 2 (Gamma-actin) [Rattus	gi|109492380,gi|1351867,gi|14250401,gi|15277503,gi|16924319,gi|197099682,gi|2318133,gi|28336,gi|4501885,gi|4501887,gi|45269029,gi|47116231,gi|60389477,gi|62897409,gi|62897625,gi|62897671,gi|66735458,gi|67971314,gi|73958059,gi|73958065,gi|73958067,gi|73964667,gi|74151948,gi|74187644,gi|74190672,gi|74191399,gi|74191564,gi|74191566,gi|74213524,gi|809561	41719.8	1	3	0.109	AGFAGDDAPR	0.877	gi|74178273
1M with BAF	PREDICTED: similar to Actin, cytoplasmic 2 (Gamma-actin) [Rattus	gi|109492380,gi|1351867,gi|14250401,gi|15277503,gi|16924319,gi|197099682,gi|2318133,gi|28336,gi|4501885,gi|4501887,gi|45269029,gi|47116231,gi|60389477,gi|62897409,gi|62897625,gi|62897671,gi|66735458,gi|67971314,gi|73958059,gi|73958065,gi|73958067,gi|73964667,gi|74151948,gi|74187644,gi|74190672,gi|74191399,gi|74191564,gi|74191566,gi|74213524,gi|809561	41719.8	1	3	0.109	QEYDESGPSIVHR	0.95	gi|74178273,gi|2724046
1M with BAF	PREDICTED: similar to Actin, cytoplasmic 2 (Gamma-actin) [Rattus	gi|109492380,gi|1351867,gi|14250401,gi|15277503,gi|16924319,gi|197099682,gi|2318133,gi|28336,gi|4501885,gi|4501887,gi|45269029,gi|47116231,gi|60389477,gi|62897409,gi|62897625,gi|62897671,gi|66735458,gi|67971314,gi|73958059,gi|73958065,gi|73958067,gi|73964667,gi|74151948,gi|74187644,gi|74190672,gi|74191399,gi|74191564,gi|74191566,gi|74213524,gi|809561	41719.8	1	3	0.109	VAPEEHPVLLTEAPLNPK	0.95	gi|2724046
1M with BAF	Keratin 14 (epidermolysis bullosa simplex, Dowling-Meara, Koebner) [Homo sapiens]	gi|12803709,gi|15431310,gi|386848	51634.6	1	13	0.305	ALEEANADLEVK	0.95	gi|24430192,gi|1195531
1M with BAF	Keratin 14 (epidermolysis bullosa simplex, Dowling-Meara, Koebner) [Homo sapiens]	gi|12803709,gi|15431310,gi|386848	51634.6	1	13	0.305	DAEEWFFTK	0.95	0
1M with BAF	Keratin 14 (epidermolysis bullosa simplex, Dowling-Meara, Koebner) [Homo sapiens]	gi|12803709,gi|15431310,gi|386848	51634.6	1	13	0.305	EVATNSELVQSGK	0.95	gi|21754583,gi|4557701
1M with BAF	Keratin 14 (epidermolysis bullosa simplex, Dowling-Meara, Koebner) [Homo sapiens]	gi|12803709,gi|15431310,gi|386848	51634.6	1	13	0.305	GQVGGDVNVEMDAAPGVDLSR	0.95	0
1M with BAF	Keratin 14 (epidermolysis bullosa simplex, Dowling-Meara, Koebner) [Homo sapiens]	gi|12803709,gi|15431310,gi|386848	51634.6	1	13	0.305	ILLDVK	0.859	gi|21754583,gi|4557701
1M with BAF	Keratin 14 (epidermolysis bullosa simplex, Dowling-Meara, Koebner) [Homo sapiens]	gi|12803709,gi|15431310,gi|386848	51634.6	1	13	0.305	ILNEMR	0.95	gi|24430192,gi|1195531,gi|21754583,gi|4557701
1M with BAF	Keratin 14 (epidermolysis bullosa simplex, Dowling-Meara, Koebner) [Homo sapiens]	gi|12803709,gi|15431310,gi|386848	51634.6	1	13	0.305	LASYLDK	0.95	gi|55956899,gi|81175178,gi|24430192,gi|1195531,gi|28317,gi|21961605,gi|21754583,gi|4557701
1M with BAF	Keratin 14 (epidermolysis bullosa simplex, Dowling-Meara, Koebner) [Homo sapiens]	gi|12803709,gi|15431310,gi|386848	51634.6	1	13	0.305	LEQEIATYR	0.95	gi|24430192,gi|1195531,gi|21754583,gi|4557701
1M with BAF	Keratin 14 (epidermolysis bullosa simplex, Dowling-Meara, Koebner) [Homo sapiens]	gi|12803709,gi|15431310,gi|386848	51634.6	1	13	0.305	LLEGEDAHLSSSQFSSGSQSSR	0.95	0
1M with BAF	Keratin 14 (epidermolysis bullosa simplex, Dowling-Meara, Koebner) [Homo sapiens]	gi|12803709,gi|15431310,gi|386848	51634.6	1	13	0.305	MSVEADINGLR	0.95	0
1M with BAF	Keratin 14 (epidermolysis bullosa simplex, Dowling-Meara, Koebner) [Homo sapiens]	gi|12803709,gi|15431310,gi|386848	51634.6	1	13	0.305	NHEEEMNALR	0.825	gi|21754583,gi|4557701
1M with BAF	Keratin 14 (epidermolysis bullosa simplex, Dowling-Meara, Koebner) [Homo sapiens]	gi|12803709,gi|15431310,gi|386848	51634.6	1	13	0.305	SEISELR	0.935	gi|21754583,gi|4557701
1M with BAF	Keratin 14 (epidermolysis bullosa simplex, Dowling-Meara, Koebner) [Homo sapiens]	gi|12803709,gi|15431310,gi|386848	51634.6	1	13	0.305	TRLEQEIATYR	0.95	gi|24430192,gi|1195531,gi|21754583,gi|4557701
1M with BAF	Keratin 14 (epidermolysis bullosa simplex, Dowling-Meara, Koebner) [Homo sapiens]	gi|12803709,gi|15431310,gi|386848	51634.6	1	13	0.305	VLDELTLAR	0.95	gi|24430192,gi|1195531,gi|21754583,gi|4557701
1M with BAF	PREDICTED: similar to nucleolin [Macaca mulatta].	gi|109101818,gi|189306,gi|197098386,gi|21750187,gi|34534595,gi|55956788,gi|75075722	76597.9	0.99	2	0.0408	GIAYIEFK	0.793	0
1M with BAF	PREDICTED: similar to nucleolin [Macaca mulatta].	gi|109101818,gi|189306,gi|197098386,gi|21750187,gi|34534595,gi|55956788,gi|75075722	76597.9	0.99	2	0.0408	VEGTEPTTAFNLFVGNLNFNK	0.95	0
1M with BAF	Chain A, Trypsin In Complex With Borate.	gi|110590762,gi|136429,gi|2914482	23457.3	1	4	0.26	IITHPNFNGNTLDNDIMLIK	0.95	0
1M with BAF	Chain A, Trypsin In Complex With Borate.	gi|110590762,gi|136429,gi|2914482	23457.3	1	4	0.26	LGEHNIDVLEGNEQFINAAK	0.95	0
1M with BAF	Chain A, Trypsin In Complex With Borate.	gi|110590762,gi|136429,gi|2914482	23457.3	1	4	0.26	LSSPATLNSR	0.715	0
1M with BAF	Chain A, Trypsin In Complex With Borate.	gi|110590762,gi|136429,gi|2914482	23457.3	1	4	0.26	VATVSLPR	0.95	0
1M with BAF	PREDICTED: similar to H2A histone family, member V isoform 1	gi|109066680,gi|109500010,gi|4504255,gi|56238118,gi|62087582,gi|6912616,gi|74195793	13535.2	0.999	3	0.203	AGLQFPVGR	0.95	gi|224567,gi|10800130,gi|109070062,gi|57110393,gi|4504239,gi|109157563,gi|12025520,gi|57110495,gi|57110409,gi|30061327,gi|29244126,gi|74004170,gi|30061371,gi|18105045,gi|57096146,gi|74004189,gi|29553970,gi|57106965,gi|109095827,gi|4504245,gi|817939,gi|24638446,gi|10800144,gi|51304,gi|81884124,gi|28316756,gi|57110427,gi|157821615,gi|4504251,gi|10645195,gi|66730355,gi|73981533,gi|74003986,gi|300613…
1M with BAF	PREDICTED: similar to H2A histone family, member V isoform 1	gi|109066680,gi|109500010,gi|4504255,gi|56238118,gi|62087582,gi|6912616,gi|74195793	13535.2	0.999	3	0.203	GDEELDSLIK	0.95	gi|74207672
1M with BAF	PREDICTED: similar to H2A histone family, member V isoform 1	gi|109066680,gi|109500010,gi|4504255,gi|56238118,gi|62087582,gi|6912616,gi|74195793	13535.2	0.999	3	0.203	HLQLAIR	0.555	gi|224567,gi|10800130,gi|109070062,gi|57110393,gi|4504239,gi|109157563,gi|12025520,gi|57110495,gi|57110409,gi|30061327,gi|29244126,gi|74004170,gi|30061371,gi|18105045,gi|57096146,gi|74004189,gi|29553970,gi|57106965,gi|109095827,gi|4504245,gi|817939,gi|24638446,gi|10800144,gi|51304,gi|81884124,gi|28316756,gi|57110427,gi|157821615,gi|4504251,gi|10645195,gi|66730355,gi|73981533,gi|74003986,gi|300613…
1M with BAF	chromatin-specific transcription elongation factor large subunit [Homo sapiens], gi|114651875|ref|XP_528703.2| PREDICTED: similar to chromatin-specific transcription elongation factor FACT 140 kDa subunit isoform 2 [Pan troglodytes], gi|74753511|sp|Q9Y5B9|SPT16_HUMAN FACT complex subunit SPT16 (Facilitates chromatin transcription complex subunit SPT16) (hSPT16) (FACT 140 kDa subunit) (FACTp140) (…	gi|6005757,gi|73977348,gi|73977350,gi|76627095	119899	1	6	0.0783	APGEQTVPALNLQNAFR	0.918	0
1M with BAF	chromatin-specific transcription elongation factor large subunit [Homo sapiens], gi|114651875|ref|XP_528703.2| PREDICTED: similar to chromatin-specific transcription elongation factor FACT 140 kDa subunit isoform 2 [Pan troglodytes], gi|74753511|sp|Q9Y5B9|SPT16_HUMAN FACT complex subunit SPT16 (Facilitates chromatin transcription complex subunit SPT16) (hSPT16) (FACT 140 kDa subunit) (FACTp140) (…	gi|6005757,gi|73977348,gi|73977350,gi|76627095	119899	1	6	0.0783	ELAAQLNEEAK	0.95	0
1M with BAF	chromatin-specific transcription elongation factor large subunit [Homo sapiens], gi|114651875|ref|XP_528703.2| PREDICTED: similar to chromatin-specific transcription elongation factor FACT 140 kDa subunit isoform 2 [Pan troglodytes], gi|74753511|sp|Q9Y5B9|SPT16_HUMAN FACT complex subunit SPT16 (Facilitates chromatin transcription complex subunit SPT16) (hSPT16) (FACT 140 kDa subunit) (FACTp140) (…	gi|6005757,gi|73977348,gi|73977350,gi|76627095	119899	1	6	0.0783	INFYCPGSALGR	0.95	0
1M with BAF	chromatin-specific transcription elongation factor large subunit [Homo sapiens], gi|114651875|ref|XP_528703.2| PREDICTED: similar to chromatin-specific transcription elongation factor FACT 140 kDa subunit isoform 2 [Pan troglodytes], gi|74753511|sp|Q9Y5B9|SPT16_HUMAN FACT complex subunit SPT16 (Facilitates chromatin transcription complex subunit SPT16) (hSPT16) (FACT 140 kDa subunit) (FACTp140) (…	gi|6005757,gi|73977348,gi|73977350,gi|76627095	119899	1	6	0.0783	NEDEEEEEEEKDEAEDLLGR	0.95	0
1M with BAF	chromatin-specific transcription elongation factor large subunit [Homo sapiens], gi|114651875|ref|XP_528703.2| PREDICTED: similar to chromatin-specific transcription elongation factor FACT 140 kDa subunit isoform 2 [Pan troglodytes], gi|74753511|sp|Q9Y5B9|SPT16_HUMAN FACT complex subunit SPT16 (Facilitates chromatin transcription complex subunit SPT16) (hSPT16) (FACT 140 kDa subunit) (FACTp140) (…	gi|6005757,gi|73977348,gi|73977350,gi|76627095	119899	1	6	0.0783	QDSLVINLNR	0.95	0
1M with BAF	chromatin-specific transcription elongation factor large subunit [Homo sapiens], gi|114651875|ref|XP_528703.2| PREDICTED: similar to chromatin-specific transcription elongation factor FACT 140 kDa subunit isoform 2 [Pan troglodytes], gi|74753511|sp|Q9Y5B9|SPT16_HUMAN FACT complex subunit SPT16 (Facilitates chromatin transcription complex subunit SPT16) (hSPT16) (FACT 140 kDa subunit) (FACTp140) (…	gi|6005757,gi|73977348,gi|73977350,gi|76627095	119899	1	6	0.0783	YTEGVQSLNWTK	0.95	0
1M with BAF	keratin 9 [Homo sapiens].	gi|55956899,gi|81175178	62113	1	8	0.215	EIETYHNLLEGGQEDFESSGAGK	0.95	0
1M with BAF	keratin 9 [Homo sapiens].	gi|55956899,gi|81175178	62113	1	8	0.215	FEMEQNLR	0.755	0
1M with BAF	keratin 9 [Homo sapiens].	gi|55956899,gi|81175178	62113	1	8	0.215	GGSGGSHGGGSGFGGESGGSYGGGEEASGSGGGYGGGSGK	0.95	0
1M with BAF	keratin 9 [Homo sapiens].	gi|55956899,gi|81175178	62113	1	8	0.215	IQDWYDK	0.793	0
1M with BAF	keratin 9 [Homo sapiens].	gi|55956899,gi|81175178	62113	1	8	0.215	LASYLDK	0.95	gi|24430192,gi|15431310,gi|1195531,gi|386848,gi|28317,gi|21961605,gi|21754583,gi|4557701,gi|12803709
1M with BAF	keratin 9 [Homo sapiens].	gi|55956899,gi|81175178	62113	1	8	0.215	MTLDDFR	0.722	0
1M with BAF	keratin 9 [Homo sapiens].	gi|55956899,gi|81175178	62113	1	8	0.215	QVLDNLTMEK	0.95	0
1M with BAF	keratin 9 [Homo sapiens].	gi|55956899,gi|81175178	62113	1	8	0.215	SDLEMQYETLQEELMALK	0.95	0
1M with BAF	keratin 9 [Homo sapiens].	gi|55956899,gi|81175178	62113	1	8	0.215	VQALEEANNDLENK	0.95	0
1M with BAF	nucleophosmin 1 isoform 1 [Homo sapiens], gi|114662863|ref|XP_001151979.1| PREDICTED: similar to nucleophosmin - human isoform 3 [Pan troglodytes], gi|114662865|ref|XP_001152043.1| PREDICTED: similar to nucleophosmin - human isoform 4 [Pan troglodytes], gi|114762|sp|P06748|NPM_HUMAN Nucleophosmin (NPM) (Nucleolar phosphoprotein B23) (Numatrin) (Nucleolar protein NO38), gi|189272|gb|AAA36380.1| nu…	gi|10835063,gi|109079755,gi|16876992,gi|197101984,gi|33694244,gi|40353734,gi|58220469,gi|73949577,gi|73949583,gi|73949585,gi|73953440,gi|73953442,gi|73953454,gi|73953458,gi|825671	32557.4	1	5	0.214	DELHIVEAEAMNYEGSPIK	0.95	0
1M with BAF	nucleophosmin 1 isoform 1 [Homo sapiens], gi|114662863|ref|XP_001151979.1| PREDICTED: similar to nucleophosmin - human isoform 3 [Pan troglodytes], gi|114662865|ref|XP_001152043.1| PREDICTED: similar to nucleophosmin - human isoform 4 [Pan troglodytes], gi|114762|sp|P06748|NPM_HUMAN Nucleophosmin (NPM) (Nucleolar phosphoprotein B23) (Numatrin) (Nucleolar protein NO38), gi|189272|gb|AAA36380.1| nu…	gi|10835063,gi|109079755,gi|16876992,gi|197101984,gi|33694244,gi|40353734,gi|58220469,gi|73949577,gi|73949583,gi|73949585,gi|73953440,gi|73953442,gi|73953454,gi|73953458,gi|825671	32557.4	1	5	0.214	GPSSVEDIK	0.95	0
1M with BAF	nucleophosmin 1 isoform 1 [Homo sapiens], gi|114662863|ref|XP_001151979.1| PREDICTED: similar to nucleophosmin - human isoform 3 [Pan troglodytes], gi|114662865|ref|XP_001152043.1| PREDICTED: similar to nucleophosmin - human isoform 4 [Pan troglodytes], gi|114762|sp|P06748|NPM_HUMAN Nucleophosmin (NPM) (Nucleolar phosphoprotein B23) (Numatrin) (Nucleolar protein NO38), gi|189272|gb|AAA36380.1| nu…	gi|10835063,gi|109079755,gi|16876992,gi|197101984,gi|33694244,gi|40353734,gi|58220469,gi|73949577,gi|73949583,gi|73949585,gi|73953440,gi|73953442,gi|73953454,gi|73953458,gi|825671	32557.4	1	5	0.214	LLSISGK	0.95	0
1M with BAF	nucleophosmin 1 isoform 1 [Homo sapiens], gi|114662863|ref|XP_001151979.1| PREDICTED: similar to nucleophosmin - human isoform 3 [Pan troglodytes], gi|114662865|ref|XP_001152043.1| PREDICTED: similar to nucleophosmin - human isoform 4 [Pan troglodytes], gi|114762|sp|P06748|NPM_HUMAN Nucleophosmin (NPM) (Nucleolar phosphoprotein B23) (Numatrin) (Nucleolar protein NO38), gi|189272|gb|AAA36380.1| nu…	gi|10835063,gi|109079755,gi|16876992,gi|197101984,gi|33694244,gi|40353734,gi|58220469,gi|73949577,gi|73949583,gi|73949585,gi|73953440,gi|73953442,gi|73953454,gi|73953458,gi|825671	32557.4	1	5	0.214	MSVQPTVSLGGFEITPPVVLR	0.95	0
1M with BAF	nucleophosmin 1 isoform 1 [Homo sapiens], gi|114662863|ref|XP_001151979.1| PREDICTED: similar to nucleophosmin - human isoform 3 [Pan troglodytes], gi|114662865|ref|XP_001152043.1| PREDICTED: similar to nucleophosmin - human isoform 4 [Pan troglodytes], gi|114762|sp|P06748|NPM_HUMAN Nucleophosmin (NPM) (Nucleolar phosphoprotein B23) (Numatrin) (Nucleolar protein NO38), gi|189272|gb|AAA36380.1| nu…	gi|10835063,gi|109079755,gi|16876992,gi|197101984,gi|33694244,gi|40353734,gi|58220469,gi|73949577,gi|73949583,gi|73949585,gi|73953440,gi|73953442,gi|73953454,gi|73953458,gi|825671	32557.4	1	5	0.214	VTLATLK	0.635	0
1M with BAF	Brain abundant, membrane attached signal protein 1 [Homo sapiens].	gi|12653493,gi|30795231	22675.3	0.994	2	0.123	ESEPQAAAEPAEAK	0.883	0
1M with BAF	Brain abundant, membrane attached signal protein 1 [Homo sapiens].	gi|12653493,gi|30795231	22675.3	0.994	2	0.123	ETPAATEAPSSTPK	0.95	0
0	0	0	0	0	0	0	0	0	0
0	0	0	0	0	0	0	0	0	0
0	0	0	0	0	0	0	0	0	0
0	0	0	0	0	0	0	0	0	0
0	0	0	0	0	0	0	0	0	0
0	0	0	0	0	0	0	0	0	0
0	0	0	0	0	0	0	0	0	0
0	0	0	0	0	0	0	0	0	0
0	0	0	0	0	0	0	0	0	0
0	0	0	0	0	0	0	0	0	0
0	0	0	0	0	0	0	0	0	0
0	0	0	0	0	0	0	0	0	0
0	0	0	0	0	0	0	0	0	0
0	0	0	0	0	0	0	0	0	0
0	0	0	0	0	0	0	0	0	0
0	0	0	0	0	0	0	0	0	0
0	0	0	0	0	0	0	0	0	0
0	0	0	0	0	0	0	0	0	0
0	0	0	0	0	0	0	0	0	0
0	0	0	0	0	0	0	0	0	0
0	0	0	0	0	0	0	0	0	0
0	0	0	0	0	0	0	0	0	0
0	0	0	0	0	0	0	0	0	0
0	0	0	0	0	0	0	0	0	0
0	0	0	0	0	0	0	0	0	0
0	0	0	0	0	0	0	0	0	0
0	0	0	0	0	0	0	0	0	0
0	0	0	0	0	0	0	0	0	0
0	0	0	0	0	0	0	0	0	0
0	0	0	0	0	0	0	0	0	0
0	0	0	0	0	0	0	0	0	0
0	0	0	0	0	0	0	0	0	0
0	0	0	0	0	0	0	0	0	0
0	0	0	0	0	0	0	0	0	0
0	0	0	0	0	0	0	0	0	0
0	0	0	0	0	0	0	0	0	0
0	0	0	0	0	0	0	0	0	0
0	0	0	0	0	0	0	0	0	0
0	0	0	0	0	0	0	0	0	0
0	0	0	0	0	0	0	0	0	0
0	0	0	0	0	0	0	0	0	0
0	0	0	0	0	0	0	0	0	0
0	0	0	0	0	0	0	0	0	0
0	0	0	0	0	0	0	0	0	0
0	0	0	0	0	0	0	0	0	0
0	0	0	0	0	0	0	0	0	0
0	0	0	0	0	0	0	0	0	0
0	0	0	0	0	0	0	0	0	0
0	0	0	0	0	0	0	0	0	0
0	0	0	0	0	0	0	0	0	0
0	0	0	0	0	0	0	0	0	0
0	0	0	0	0	0	0	0	0	0
0	0	0	0	0	0	0	0	0	0
0	0	0	0	0	0	0	0	0	0
0	0	0	0	0	0	0	0	0	0
0	0	0	0	0	0	0	0	0	0
0	0	0	0	0	0	0	0	0	0
0	0	0	0	0	0	0	0	0	0
0	0	0	0	0	0	0	0	0	0
0	0	0	0	0	0	0	0	0	0
0	0	0	0	0	0	0	0	0	0
0	0	0	0	0	0	0	0	0	0
0	0	0	0	0	0	0	0	0	0
0	0	0	0	0	0	0	0	0	0
0	0	0	0	0	0	0	0	0	0
0	0	0	0	0	0	0	0	0	0
0	0	0	0	0	0	0	0	0	0
0	0	0	0	0	0	0	0	0	0
0	0	0	0	0	0	0	0	0	0
0	0	0	0	0	0	0	0	0	0
0	0	0	0	0	0	0	0	0	0
0	0	0	0	0	0	0	0	0	0
0	0	0	0	0	0	0	0	0	0
0	0	0	0	0	0	0	0	0	0
0	0	0	0	0	0	0	0	0	0
0	0	0	0	0	0	0	0	0	0
0	0	0	0	0	0	0	0	0	0
0	0	0	0	0	0	0	0	0	0
0	0	0	0	0	0	0	0	0	0
0	0	0	0	0	0	0	0	0	0
0	0	0	0	0	0	0	0	0	0
0	0	0	0	0	0	0	0	0	0
0	0	0	0	0	0	0	0	0	0
0	0	0	0	0	0	0	0	0	0
0	0	0	0	0	0	0	0	0	0
0	0	0	0	0	0	0	0	0	0
0	0	0	0	0	0	0	0	0	0
0	0	0	0	0	0	0	0	0	0
0	0	0	0	0	0	0	0	0	0
0	0	0	0	0	0	0	0	0	0
0	0	0	0	0	0	0	0	0	0
0	0	0	0	0	0	0	0	0	0
0	0	0	0	0	0	0	0	0	0
0	0	0	0	0	0	0	0	0	0
0	0	0	0	0	0	0	0	0	0
0	0	0	0	0	0	0	0	0	0
0	0	0	0	0	0	0	0	0	0
0	0	0	0	0	0	0	0	0	0
0	0	0	0	0	0	0	0	0	0
0	0	0	0	0	0	0	0	0	0
0	0	0	0	0	0	0	0	0	0
0	0	0	0	0	0	0	0	0	0
0	0	0	0	0	0	0	0	0	0
0	0	0	0	0	0	0	0	0	0
0	0	0	0	0	0	0	0	0	0
0	0	0	0	0	0	0	0	0	0
0	0	0	0	0	0	0	0	0	0
0	0	0	0	0	0	0	0	0	0
0	0	0	0	0	0	0	0	0	0
0	0	0	0	0	0	0	0	0	0
0	0	0	0	0	0	0	0	0	0
0	0	0	0	0	0	0	0	0	0
0	0	0	0	0	0	0	0	0	0
0	0	0	0	0	0	0	0	0	0
0	0	0	0	0	0	0	0	0	0
0	0	0	0	0	0	0	0	0	0
0	0	0	0	0	0	0	0	0	0
0	0	0	0	0	0	0	0	0	0
0	0	0	0	0	0	0	0	0	0
0	0	0	0	0	0	0	0	0	0
0	0	0	0	0	0	0	0	0	0
0	0	0	0	0	0	0	0	0	0
0	0	0	0	0	0	0	0	0	0
0	0	0	0	0	0	0	0	0	0
0	0	0	0	0	0	0	0	0	0
0	0	0	0	0	0	0	0	0	0
0	0	0	0	0	0	0	0	0	0
0	0	0	0	0	0	0	0	0	0
0	0	0	0	0	0	0	0	0	0
0	0	0	0	0	0	0	0	0	0
0	0	0	0	0	0	0	0	0	0
0	0	0	0	0	0	0	0	0	0
0	0	0	0	0	0	0	0	0	0
0	0	0	0	0	0	0	0	0	0
0	0	0	0	0	0	0	0	0	0
0	0	0	0	0	0	0	0	0	0
0	0	0	0	0	0	0	0	0	0
0	0	0	0	0	0	0	0	0	0
0	0	0	0	0	0	0	0	0	0
0	0	0	0	0	0	0	0	0	0
0	0	0	0	0	0	0	0	0	0
0	0	0	0	0	0	0	0	0	0
0	0	0	0	0	0	0	0	0	0
0	0	0	0	0	0	0	0	0	0
0	0	0	0	0	0	0	0	0	0
0	0	0	0	0	0	0	0	0	0
0	0	0	0	0	0	0	0	0	0
0	0	0	0	0	0	0	0	0	0
0	0	0	0	0	0	0	0	0	0
0	0	0	0	0	0	0	0	0	0
0	0	0	0	0	0	0	0	0	0
0	0	0	0	0	0	0	0	0	0
0	0	0	0	0	0	0	0	0	0
0	0	0	0	0	0	0	0	0	0
0	0	0	0	0	0	0	0	0	0
0	0	0	0	0	0	0	0	0	0
0	0	0	0	0	0	0	0	0	0
0	0	0	0	0	0	0	0	0	0
0	0	0	0	0	0	0	0	0	0
0	0	0	0	0	0	0	0	0	0
0	0	0	0	0	0	0	0	0	0
0	0	0	0	0	0	0	0	0	0
0	0	0	0	0	0	0	0	0	0
0	0	0	0	0	0	0	0	0	0
0	0	0	0	0	0	0	0	0	0
0	0	0	0	0	0	0	0	0	0
0	0	0	0	0	0	0	0	0	0
0	0	0	0	0	0	0	0	0	0
0	0	0	0	0	0	0	0	0	0
0	0	0	0	0	0	0	0	0	0
0	0	0	0	0	0	0	0	0	0
0	0	0	0	0	0	0	0	0	0
0	0	0	0	0	0	0	0	0	0
0	0	0	0	0	0	0	0	0	0
0	0	0	0	0	0	0	0	0	0
0	0	0	0	0	0	0	0	0	0
0	0	0	0	0	0	0	0	0	0
0	0	0	0	0	0	0	0	0	0
0	0	0	0	0	0	0	0	0	0
0	0	0	0	0	0	0	0	0	0
0	0	0	0	0	0	0	0	0	0
0	0	0	0	0	0	0	0	0	0
0	0	0	0	0	0	0	0	0	0
0	0	0	0	0	0	0	0	0	0
0	0	0	0	0	0	0	0	0	0
0	0	0	0	0	0	0	0	0	0
0	0	0	0	0	0	0	0	0	0
0	0	0	0	0	0	0	0	0	0
0	0	0	0	0	0	0	0	0	0
0	0	0	0	0	0	0	0	0	0
0	0	0	0	0	0	0	0	0	0
0	0	0	0	0	0	0	0	0	0
0	0	0	0	0	0	0	0	0	0
0	0	0	0	0	0	0	0	0	0
0	0	0	0	0	0	0	0	0	0
0	0	0	0	0	0	0	0	0	0
0	0	0	0	0	0	0	0	0	0
0	0	0	0	0	0	0	0	0	0
0	0	0	0	0	0	0	0	0	0
0	0	0	0	0	0	0	0	0	0
0	0	0	0	0	0	0	0	0	0
0	0	0	0	0	0	0	0	0	0
0	0	0	0	0	0	0	0	0	0
0	0	0	0	0	0	0	0	0	0
0	0	0	0	0	0	0	0	0	0
0	0	0	0	0	0	0	0	0	0
0	0	0	0	0	0	0	0	0	0
0	0	0	0	0	0	0	0	0	0
0	0	0	0	0	0	0	0	0	0
0	0	0	0	0	0	0	0	0	0
0	0	0	0	0	0	0	0	0	0
0	0	0	0	0	0	0	0	0	0
0	0	0	0	0	0	0	0	0	0
0	0	0	0	0	0	0	0	0	0
0	0	0	0	0	0	0	0	0	0
0	0	0	0	0	0	0	0	0	0
0	0	0	0	0	0	0	0	0	0
0	0	0	0	0	0	0	0	0	0
0	0	0	0	0	0	0	0	0	0
0	0	0	0	0	0	0	0	0	0
0	0	0	0	0	0	0	0	0	0
0	0	0	0	0	0	0	0	0	0
0	0	0	0	0	0	0	0	0	0
0	0	0	0	0	0	0	0	0	0
0	0	0	0	0	0	0	0	0	0
0	0	0	0	0	0	0	0	0	0
0	0	0	0	0	0	0	0	0	0
0	0	0	0	0	0	0	0	0	0
0	0	0	0	0	0	0	0	0	0
0	0	0	0	0	0	0	0	0	0
0	0	0	0	0	0	0	0	0	0
0	0	0	0	0	0	0	0	0	0
0	0	0	0	0	0	0	0	0	0
0	0	0	0	0	0	0	0	0	0
0	0	0	0	0	0	0	0	0	0
0	0	0	0	0	0	0	0	0	0
0	0	0	0	0	0	0	0	0	0
0	0	0	0	0	0	0	0	0	0
0	0	0	0	0	0	0	0	0	0
0	0	0	0	0	0	0	0	0	0
0	0	0	0	0	0	0	0	0	0
0	0	0	0	0	0	0	0	0	0
0	0	0	0	0	0	0	0	0	0
0	0	0	0	0	0	0	0	0	0
0	0	0	0	0	0	0	0	0	0
0	0	0	0	0	0	0	0	0	0
0	0	0	0	0	0	0	0	0	0
0	0	0	0	0	0	0	0	0	0
0	0	0	0	0	0	0	0	0	0
0	0	0	0	0	0	0	0	0	0
0	0	0	0	0	0	0	0	0	0
0	0	0	0	0	0	0	0	0	0
0	0	0	0	0	0	0	0	0	0
0	0	0	0	0	0	0	0	0	0
0	0	0	0	0	0	0	0	0	0
0	0	0	0	0	0	0	0	0	0
0	0	0	0	0	0	0	0	0	0
0	0	0	0	0	0	0	0	0	0
0	0	0	0	0	0	0	0	0	0
0	0	0	0	0	0	0	0	0	0
0	0	0	0	0	0	0	0	0	0
0	0	0	0	0	0	0	0	0	0
0	0	0	0	0	0	0	0	0	0
0	0	0	0	0	0	0	0	0	0
0	0	0	0	0	0	0	0	0	0
0	0	0	0	0	0	0	0	0	0
0	0	0	0	0	0	0	0	0	0
0	0	0	0	0	0	0	0	0	0
0	0	0	0	0	0	0	0	0	0
0	0	0	0	0	0	0	0	0	0
0	0	0	0	0	0	0	0	0	0
0	0	0	0	0	0	0	0	0	0
0	0	0	0	0	0	0	0	0	0
0	0	0	0	0	0	0	0	0	0
0	0	0	0	0	0	0	0	0	0
0	0	0	0	0	0	0	0	0	0
0	0	0	0	0	0	0	0	0	0
0	0	0	0	0	0	0	0	0	0
0	0	0	0	0	0	0	0	0	0
0	0	0	0	0	0	0	0	0	0
0	0	0	0	0	0	0	0	0	0
0	0	0	0	0	0	0	0	0	0
0	0	0	0	0	0	0	0	0	0
0	0	0	0	0	0	0	0	0	0
0	0	0	0	0	0	0	0	0	0
0	0	0	0	0	0	0	0	0	0
0	0	0	0	0	0	0	0	0	0
0	0	0	0	0	0	0	0	0	0
0	0	0	0	0	0	0	0	0	0
0	0	0	0	0	0	0	0	0	0
0	0	0	0	0	0	0	0	0	0
0	0	0	0	0	0	0	0	0	0
0	0	0	0	0	0	0	0	0	0
0	0	0	0	0	0	0	0	0	0
0	0	0	0	0	0	0	0	0	0
0	0	0	0	0	0	0	0	0	0
0	0	0	0	0	0	0	0	0	0
0	0	0	0	0	0	0	0	0	0
0	0	0	0	0	0	0	0	0	0
0	0	0	0	0	0	0	0	0	0
0	0	0	0	0	0	0	0	0	0
0	0	0	0	0	0	0	0	0	0
0	0	0	0	0	0	0	0	0	0
0	0	0	0	0	0	0	0	0	0
0	0	0	0	0	0	0	0	0	0
0	0	0	0	0	0	0	0	0	0
0	0	0	0	0	0	0	0	0	0
0	0	0	0	0	0	0	0	0	0
0	0	0	0	0	0	0	0	0	0
0	0	0	0	0	0	0	0	0	0
0	0	0	0	0	0	0	0	0	0
0	0	0	0	0	0	0	0	0	0
0	0	0	0	0	0	0	0	0	0
0	0	0	0	0	0	0	0	0	0
0	0	0	0	0	0	0	0	0	0
0	0	0	0	0	0	0	0	0	0
0	0	0	0	0	0	0	0	0	0
0	0	0	0	0	0	0	0	0	0
0	0	0	0	0	0	0	0	0	0
0	0	0	0	0	0	0	0	0	0
0	0	0	0	0	0	0	0	0	0
0	0	0	0	0	0	0	0	0	0
0	0	0	0	0	0	0	0	0	0
0	0	0	0	0	0	0	0	0	0
0	0	0	0	0	0	0	0	0	0
0	0	0	0	0	0	0	0	0	0
0	0	0	0	0	0	0	0	0	0
0	0	0	0	0	0	0	0	0	0
0	0	0	0	0	0	0	0	0	0
0	0	0	0	0	0	0	0	0	0
0	0	0	0	0	0	0	0	0	0
0	0	0	0	0	0	0	0	0	0
0	0	0	0	0	0	0	0	0	0
0	0	0	0	0	0	0	0	0	0
0	0	0	0	0	0	0	0	0	0
0	0	0	0	0	0	0	0	0	0
0	0	0	0	0	0	0	0	0	0
0	0	0	0	0	0	0	0	0	0
0	0	0	0	0	0	0	0	0	0
0	0	0	0	0	0	0	0	0	0
0	0	0	0	0	0	0	0	0	0
0	0	0	0	0	0	0	0	0	0
0	0	0	0	0	0	0	0	0	0
0	0	0	0	0	0	0	0	0	0
0	0	0	0	0	0	0	0	0	0
0	0	0	0	0	0	0	0	0	0
0	0	0	0	0	0	0	0	0	0
0	0	0	0	0	0	0	0	0	0
0	0	0	0	0	0	0	0	0	0
0	0	0	0	0	0	0	0	0	0
0	0	0	0	0	0	0	0	0	0
0	0	0	0	0	0	0	0	0	0
0	0	0	0	0	0	0	0	0	0
0	0	0	0	0	0	0	0	0	0
0	0	0	0	0	0	0	0	0	0
0	0	0	0	0	0	0	0	0	0
0	0	0	0	0	0	0	0	0	0
0	0	0	0	0	0	0	0	0	0
0	0	0	0	0	0	0	0	0	0
0	0	0	0	0	0	0	0	0	0
0	0	0	0	0	0	0	0	0	0
0	0	0	0	0	0	0	0	0	0
0	0	0	0	0	0	0	0	0	0
0	0	0	0	0	0	0	0	0	0
0	0	0	0	0	0	0	0	0	0
0	0	0	0	0	0	0	0	0	0
0	0	0	0	0	0	0	0	0	0
0	0	0	0	0	0	0	0	0	0
0	0	0	0	0	0	0	0	0	0
0	0	0	0	0	0	0	0	0	0
0	0	0	0	0	0	0	0	0	0
0	0	0	0	0	0	0	0	0	0
0	0	0	0	0	0	0	0	0	0
0	0	0	0	0	0	0	0	0	0
0	0	0	0	0	0	0	0	0	0
0	0	0	0	0	0	0	0	0	0
0	0	0	0	0	0	0	0	0	0
0	0	0	0	0	0	0	0	0	0
0	0	0	0	0	0	0	0	0	0
0	0	0	0	0	0	0	0	0	0
0	0	0	0	0	0	0	0	0	0
0	0	0	0	0	0	0	0	0	0
0	0	0	0	0	0	0	0	0	0
0	0	0	0	0	0	0	0	0	0
0	0	0	0	0	0	0	0	0	0
0	0	0	0	0	0	0	0	0	0
0	0	0	0	0	0	0	0	0	0
0	0	0	0	0	0	0	0	0	0
0	0	0	0	0	0	0	0	0	0
0	0	0	0	0	0	0	0	0	0
0	0	0	0	0	0	0	0	0	0
0	0	0	0	0	0	0	0	0	0
0	0	0	0	0	0	0	0	0	0
0	0	0	0	0	0	0	0	0	0
0	0	0	0	0	0	0	0	0	0
0	0	0	0	0	0	0	0	0	0
0	0	0	0	0	0	0	0	0	0
0	0	0	0	0	0	0	0	0	0
0	0	0	0	0	0	0	0	0	0
0	0	0	0	0	0	0	0	0	0
0	0	0	0	0	0	0	0	0	0
0	0	0	0	0	0	0	0	0	0
0	0	0	0	0	0	0	0	0	0
0	0	0	0	0	0	0	0	0	0
0	0	0	0	0	0	0	0	0	0
0	0	0	0	0	0	0	0	0	0
0	0	0	0	0	0	0	0	0	0
0	0	0	0	0	0	0	0	0	0
0	0	0	0	0	0	0	0	0	0
0	0	0	0	0	0	0	0	0	0
0	0	0	0	0	0	0	0	0	0
0	0	0	0	0	0	0	0	0	0
0	0	0	0	0	0	0	0	0	0
0	0	0	0	0	0	0	0	0	0
0	0	0	0	0	0	0	0	0	0
0	0	0	0	0	0	0	0	0	0
0	0	0	0	0	0	0	0	0	0
0	0	0	0	0	0	0	0	0	0
0	0	0	0	0	0	0	0	0	0
0	0	0	0	0	0	0	0	0	0
0	0	0	0	0	0	0	0	0	0
0	0	0	0	0	0	0	0	0	0
0	0	0	0	0	0	0	0	0	0
0	0	0	0	0	0	0	0	0	0
0	0	0	0	0	0	0	0	0	0
0	0	0	0	0	0	0	0	0	0
0	0	0	0	0	0	0	0	0	0
0	0	0	0	0	0	0	0	0	0
0	0	0	0	0	0	0	0	0	0
0	0	0	0	0	0	0	0	0	0
0	0	0	0	0	0	0	0	0	0
0	0	0	0	0	0	0	0	0	0
0	0	0	0	0	0	0	0	0	0
0	0	0	0	0	0	0	0	0	0
0	0	0	0	0	0	0	0	0	0
0	0	0	0	0	0	0	0	0	0
0	0	0	0	0	0	0	0	0	0
0	0	0	0	0	0	0	0	0	0
0	0	0	0	0	0	0	0	0	0
0	0	0	0	0	0	0	0	0	0
0	0	0	0	0	0	0	0	0	0
0	0	0	0	0	0	0	0	0	0
0	0	0	0	0	0	0	0	0	0
0	0	0	0	0	0	0	0	0	0
0	0	0	0	0	0	0	0	0	0
0	0	0	0	0	0	0	0	0	0
0	0	0	0	0	0	0	0	0	0
0	0	0	0	0	0	0	0	0	0
0	0	0	0	0	0	0	0	0	0

## Sheet: Scaffold Analysis Parameters
Scaffold rerun with new version, Peptide report created on 07/10/2009
Experiment: Scaffold rerun with new version
Peak List Generator: unknown
	Version: unknown
	Charge States Calculated: unknown
	Deisotoped: unknown
	Textual Annotation: unknown
Database Set: 1 Database
	Database Name: the NCBInr_20080819 database
		Version: unknown
		Taxonomy: Mammalia
		Number of Proteins: 401346
Search Engine Set: 1 Search Engine
	Search Engine: Mascot
		Version: Mascot
		Samples: All Samples
		Fragment Tolerance: 0.80 Da (Monoisotopic)
		Parent Tolerance: 1.5 Da (Monoisotopic)
		Fixed Modifications:
		Variable Modifications: +16 on M (Oxidation), +57 on C (Carbamidomethyl)
		Database: the NCBInr_20080819 database (selected for Mammalia, unknown version, 401346 entries)
		Digestion Enzyme: Trypsin
		Max Missed Cleavages: 1
Scaffold Version: Scaffold_2_04_00
	Peptide Thresholds: 0.0% minimum
	Protein Thresholds: 90.0% minimum and 1 peptides minimum

## Sheet: Full Scaffold Excel Export Here
Scaffold rerun with new version, Peptide report created on 07/10/2009
Experiment: Scaffold rerun with new version
	Peak List Generator: unknown
		Version: unknown
		Charge States Calculated: unknown
		Deisotoped: unknown
		Textual Annotation: unknown
	Database Set: 1 Database
		Database Name: the NCBInr_20080819 database
			Version: unknown
			Taxonomy: Mammalia
			Number of Proteins: 401346
	Search Engine Set: 1 Search Engine
		Search Engine: Mascot
			Version: Mascot
			Samples: All Samples
			Fragment Tolerance: 0.80 Da (Monoisotopic)
			Parent Tolerance: 1.5 Da (Monoisotopic)
			Fixed Modifications:
			Variable Modifications: +16 on M (Oxidation), +57 on C (Carbamidomethyl)
			Database: the NCBInr_20080819 database (selected for Mammalia, unknown version, 401346 entries)
			Digestion Enzyme: Trypsin
			Max Missed Cleavages: 1
	Scaffold Version: Scaffold_2_04_00
		Peptide Thresholds: 0.0% minimum
		Protein Thresholds: 90.0% minimum and 1 peptides minimum
Experiment name	Biological sample category	Biological sample name	MS/MS sample name	Protein name	Protein accession numbers	Database sources	Protein molecular weight (Da)	Protein identification probability	Number of unique peptides	Number of unique spectra	Number of total spectra	Percentage of total spectra	Percentage sequence coverage	Peptide sequence	Previous amino acid	Next amino acid	Best Peptide identification probability	Best Mascot Ion score	Best Mascot Identity score	Number of identified +1H spectra	Number of identified +2H spectra	Number of identified +3H spectra	Number of identified +4H spectra	Number of enzymatic termini	Calculated +1H Peptide Mass (AMU)	Peptide start index	Peptide stop index	Assigned	Other Proteins
Scaffold rerun with new version	Uncategorized Sample	300mM no BAF	S_300mM_no_BAF.RAW (F001830)	PREDICTED: similar to Small nuclear ribonucleoprotein Sm D1 (snRNP	gi|109486880,gi|32959908,gi|5902102		13263.9	0.908	1	1	1	7e-05	0.168	YFILPDSLPLDTLLVDVEPK	R	V	0.95	55.5	45.1	0	1	0	0	2	2287.25	67	86	TRUE
Scaffold rerun with new version	Uncategorized Sample	300mM no BAF	S_300mM_no_BAF.RAW (F001830)	PREDICTED: thyroid hormone receptor associated protein 3 [Macaca	gi|109001986,gi|167234419,gi|27370586,gi|32450532,gi|33872162,gi|41350841,gi|4530441,gi|55725214,gi|73976859,gi|73976861		108651	0.908	1	1	2	0.00014	0.0105	ASAVSELSPR	R	E	0.95	44.3	47.5	0	2	0	0	2	1016.54	236	245	TRUE
Scaffold rerun with new version	Uncategorized Sample	300mM no BAF	S_300mM_no_BAF.RAW (F001830)	pannexin 3 [Homo sapiens], gi|20139071|sp|Q96QZ0|PANX3_HUMAN Pannexin-3, gi|15341532|gb|AAK95655.1|AF406650_1 putative gap junction protein pannexin 3 [Homo sapiens], gi|119587992|gb|EAW67588.1| pannexin 3 [Homo sapiens], gi|157170156|gb|AAI52945.1| Pannexin 3 [synthetic construct] [MASS=44683]	gi|16418453		44668.1	0.908	1	1	1	7e-05	0.0204	QDGPGQDK	K	M	0.95	46	47.1	0	1	0	0	2	844.38	93	100	TRUE
Scaffold rerun with new version	Uncategorized Sample	300mM no BAF	S_300mM_no_BAF.RAW (F001830)	Keratin 10 [Homo sapiens].	gi|21961605,gi|28317		58810.8	1	8	9	16	0.00112	0.183	ALEESNYELEGK	R	I	0.95	80.5	46.5	0	3	0	0	2	1381.65	166	177	TRUE
Scaffold rerun with new version	Uncategorized Sample	300mM no BAF	S_300mM_no_BAF.RAW (F001830)	Keratin 10 [Homo sapiens].	gi|21961605,gi|28317		58810.8	1	8	9	16	0.00112	0.183	GSLGGGFSSGGFSGGSFSR	K	G	0.95	95.5	46.2	0	1	0	0	2	1707.77	41	59	TRUE
Scaffold rerun with new version	Uncategorized Sample	300mM no BAF	S_300mM_no_BAF.RAW (F001830)	Keratin 10 [Homo sapiens].	gi|21961605,gi|28317		58810.8	1	8	9	16	0.00112	0.183	LASYLDK	R	V	0.858	34.4	46.8	1	1	0	0	2	809.441	157	163	TRUE	gi|55956899,gi|81175178,gi|24430192,gi|15431310,gi|1195531,gi|386848,gi|21754583,gi|4557701,gi|12803709
Scaffold rerun with new version	Uncategorized Sample	300mM no BAF	S_300mM_no_BAF.RAW (F001830)	Keratin 10 [Homo sapiens].	gi|21961605,gi|28317		58810.8	1	8	9	16	0.00112	0.183	LKYENEVALR	R	Q	0.902	40.1	46.8	0	1	0	0	2	1234.68	236	245	TRUE
Scaffold rerun with new version	Uncategorized Sample	300mM no BAF	S_300mM_no_BAF.RAW (F001830)	Keratin 10 [Homo sapiens].	gi|21961605,gi|28317		58810.8	1	8	9	16	0.00112	0.183	NQILNLTTDNANILLQIDNAR	K	L	0.95	65.4	45.6	0	0	1	0	2	2367.26	208	228	TRUE
Scaffold rerun with new version	Uncategorized Sample	300mM no BAF	S_300mM_no_BAF.RAW (F001830)	Keratin 10 [Homo sapiens].	gi|21961605,gi|28317		58810.8	1	8	9	16	0.00112	0.183	QSLEASLAETEGR	K	Y	0.95	49.3	46.5	0	2	0	0	2	1390.68	387	399	TRUE
Scaffold rerun with new version	Uncategorized Sample	300mM no BAF	S_300mM_no_BAF.RAW (F001830)	Keratin 10 [Homo sapiens].	gi|21961605,gi|28317		58810.8	1	8	9	16	0.00112	0.183	SLLEGEGSSGGGGR	R	G	0.95	91.4	47	0	3	0	0	2	1262.6	451	464	TRUE
Scaffold rerun with new version	Uncategorized Sample	300mM no BAF	S_300mM_no_BAF.RAW (F001830)	Keratin 10 [Homo sapiens].	gi|21961605,gi|28317		58810.8	1	8	9	16	0.00112	0.183	SQYEQLAEQNR	R	K	0.95	66	46.6	0	3	0	0	2	1365.64	323	333	TRUE
Scaffold rerun with new version	Uncategorized Sample	300mM no BAF	S_300mM_no_BAF.RAW (F001830)	non-POU domain containing, octamer-binding [Bos taurus].	gi|114053303,gi|34932414,gi|407308,gi|67970671,gi|74007632,gi|74007640,gi|74007642		54233.6	1	8	8	15	0.00105	0.185	AAPGAEFAPNKR	R	R	0.95	57.4	46.7	0	3	0	0	2	1228.64	457	468	TRUE
Scaffold rerun with new version	Uncategorized Sample	300mM no BAF	S_300mM_no_BAF.RAW (F001830)	non-POU domain containing, octamer-binding [Bos taurus].	gi|114053303,gi|34932414,gi|407308,gi|67970671,gi|74007632,gi|74007640,gi|74007642		54233.6	1	8	8	15	0.00105	0.185	AGEVFIHK	K	D	0.95	47.1	46.8	0	2	0	0	2	900.494	100	107	TRUE
Scaffold rerun with new version	Uncategorized Sample	300mM no BAF	S_300mM_no_BAF.RAW (F001830)	non-POU domain containing, octamer-binding [Bos taurus].	gi|114053303,gi|34932414,gi|407308,gi|67970671,gi|74007632,gi|74007640,gi|74007642		54233.6	1	8	8	15	0.00105	0.185	AVVIVDDR	R	G	0.884	36.5	47.3	1	0	0	0	2	886.5	177	184	TRUE	gi|4826998,gi|38014635,gi|29881667
Scaffold rerun with new version	Uncategorized Sample	300mM no BAF	S_300mM_no_BAF.RAW (F001830)	non-POU domain containing, octamer-binding [Bos taurus].	gi|114053303,gi|34932414,gi|407308,gi|67970671,gi|74007632,gi|74007640,gi|74007642		54233.6	1	8	8	15	0.00105	0.185	FACHSASLTVR	R	N	0.921	41.2	46.7	0	1	0	0	2	1248.62	143	153	TRUE
Scaffold rerun with new version	Uncategorized Sample	300mM no BAF	S_300mM_no_BAF.RAW (F001830)	non-POU domain containing, octamer-binding [Bos taurus].	gi|114053303,gi|34932414,gi|407308,gi|67970671,gi|74007632,gi|74007640,gi|74007642		54233.6	1	8	8	15	0.00105	0.185	FGQAATMEGIGAIGGTPPAFNR	R	A	0.95	91.2	45.2	0	1	0	0	2	2163.07	435	456	TRUE
Scaffold rerun with new version	Uncategorized Sample	300mM no BAF	S_300mM_no_BAF.RAW (F001830)	non-POU domain containing, octamer-binding [Bos taurus].	gi|114053303,gi|34932414,gi|407308,gi|67970671,gi|74007632,gi|74007640,gi|74007642		54233.6	1	8	8	15	0.00105	0.185	MEELHNQEVQK	R	R	0.95	45.7	46.5	0	3	0	0	2	1400.65	326	336	TRUE
Scaffold rerun with new version	Uncategorized Sample	300mM no BAF	S_300mM_no_BAF.RAW (F001830)	non-POU domain containing, octamer-binding [Bos taurus].	gi|114053303,gi|34932414,gi|407308,gi|67970671,gi|74007632,gi|74007640,gi|74007642		54233.6	1	8	8	15	0.00105	0.185	TFNLEK	K	Q	0.755	30.7	47	1	0	0	0	2	751.399	6	11	TRUE
Scaffold rerun with new version	Uncategorized Sample	300mM no BAF	S_300mM_no_BAF.RAW (F001830)	non-POU domain containing, octamer-binding [Bos taurus].	gi|114053303,gi|34932414,gi|407308,gi|67970671,gi|74007632,gi|74007640,gi|74007642		54233.6	1	8	8	15	0.00105	0.185	VELDNMPLR	K	G	0.95	72.6	47.5	0	3	0	0	2	1086.56	127	135	TRUE
Scaffold rerun with new version	Uncategorized Sample	300mM no BAF	S_300mM_no_BAF.RAW (F001830)	PREDICTED: similar to DNA topoisomerase I [Macaca mulatta].	gi|109092040,gi|11225260,gi|12018294,gi|12654247,gi|220618,gi|23200355,gi|27065157,gi|28948850,gi|297079,gi|309523,gi|339806,gi|38503303,gi|40889577,gi|41056366,gi|473581,gi|473583,gi|50513401,gi|57639320,gi|586107,gi|66360105,gi|73992436,gi|74183500		115324	0.908	1	1	2	0.00014	0.00996	AVAILCNHQR	R	A	0.95	56.7	46.6	0	2	0	0	2	1181.62	864	873	TRUE
Scaffold rerun with new version	Uncategorized Sample	300mM no BAF	S_300mM_no_BAF.RAW (F001830)	PREDICTED: similar to splicing factor, arginine/serine-rich 1	gi|109114623,gi|118582269,gi|118582271,gi|179074,gi|197099026,gi|5902076,gi|62088696,gi|73966546,gi|73966552,gi|73966554		27727.1	1	5	5	8	0.00056	0.202	DAEDAVYGR	R	D	0.721	34.6	46.7	0	2	0	0	2	995.443	66	74	TRUE
Scaffold rerun with new version	Uncategorized Sample	300mM no BAF	S_300mM_no_BAF.RAW (F001830)	PREDICTED: similar to splicing factor, arginine/serine-rich 1	gi|109114623,gi|118582269,gi|118582271,gi|179074,gi|197099026,gi|5902076,gi|62088696,gi|73966546,gi|73966552,gi|73966554		27727.1	1	5	5	8	0.00056	0.202	DGTGVVEFVR	R	K	0.902	40.5	47.1	0	1	0	0	2	1078.55	155	164	TRUE
Scaffold rerun with new version	Uncategorized Sample	300mM no BAF	S_300mM_no_BAF.RAW (F001830)	PREDICTED: similar to splicing factor, arginine/serine-rich 1	gi|109114623,gi|118582269,gi|118582271,gi|179074,gi|197099026,gi|5902076,gi|62088696,gi|73966546,gi|73966552,gi|73966554		27727.1	1	5	5	8	0.00056	0.202	EAGDVCYADVYR	R	D	0.95	69	46.4	0	3	0	0	2	1417.61	143	154	TRUE
Scaffold rerun with new version	Uncategorized Sample	300mM no BAF	S_300mM_no_BAF.RAW (F001830)	PREDICTED: similar to splicing factor, arginine/serine-rich 1	gi|109114623,gi|118582269,gi|118582271,gi|179074,gi|197099026,gi|5902076,gi|62088696,gi|73966546,gi|73966552,gi|73966554		27727.1	1	5	5	8	0.00056	0.202	KEDMTYAVR	R	K	0.501	30.7	46.6	0	1	0	0	2	1112.54	165	173	TRUE
Scaffold rerun with new version	Uncategorized Sample	300mM no BAF	S_300mM_no_BAF.RAW (F001830)	PREDICTED: similar to splicing factor, arginine/serine-rich 1	gi|109114623,gi|118582269,gi|118582271,gi|179074,gi|197099026,gi|5902076,gi|62088696,gi|73966546,gi|73966552,gi|73966554		27727.1	1	5	5	8	0.00056	0.202	TKDIEDVFYK	R	Y	0.692	34	46.7	0	1	0	0	2	1257.64	29	38	TRUE
Scaffold rerun with new version	Uncategorized Sample	300mM no BAF	S_300mM_no_BAF.RAW (F001830)	PREDICTED: similar to 60S ribosomal protein L35 [Rattus	gi|109506402,gi|13385044,gi|15012043,gi|45384769,gi|47523710,gi|55632305,gi|57160644,gi|6005860,gi|77735941		14532.5	0.908	1	1	2	0.00014	0.0813	VLTVINQTQK	R	E	0.95	53	47.1	0	2	0	0	2	1143.67	57	66	TRUE
Scaffold rerun with new version	Uncategorized Sample	300mM no BAF	S_300mM_no_BAF.RAW (F001830)	PREDICTED: similar to histone 1, H2ai (predicted) isoform 1 [Canis	gi|74003971		28977.8	1	7	8	23	0.00161	0.239	AMGIMNSFVNDIFER	K	I	0.95	114	45.9	0	6	0	0	2	1743.82	192	206	TRUE	gi|10800140,gi|27693390,gi|46049029,gi|13386452,gi|109017921,gi|55589506,gi|109070012,gi|74004213,gi|4504277,gi|61835422,gi|68532405,gi|61827353,gi|20336754,gi|31979,gi|184086,gi|68226431,gi|28173554,gi|32113,gi|73975428,gi|16306566
Scaffold rerun with new version	Uncategorized Sample	300mM no BAF	S_300mM_no_BAF.RAW (F001830)	PREDICTED: similar to histone 1, H2ai (predicted) isoform 1 [Canis	gi|74003971		28977.8	1	7	8	23	0.00161	0.239	DIQLAR	K	R	0.898	38	47.5	4	0	0	0	2	715.41	124	129	TRUE	gi|109073005
Scaffold rerun with new version	Uncategorized Sample	300mM no BAF	S_300mM_no_BAF.RAW (F001830)	PREDICTED: similar to histone 1, H2ai (predicted) isoform 1 [Canis	gi|74003971		28977.8	1	7	8	23	0.00161	0.239	EIAQDFK	R	T	0.95	49.9	47.3	4	0	0	0	2	850.431	74	80	TRUE	gi|109073005
Scaffold rerun with new version	Uncategorized Sample	300mM no BAF	S_300mM_no_BAF.RAW (F001830)	PREDICTED: similar to histone 1, H2ai (predicted) isoform 1 [Canis	gi|74003971		28977.8	1	7	8	23	0.00161	0.239	KESYSVYVYK	R	V	0.95	53.8	46.7	0	2	0	0	2	1265.64	168	177	TRUE	gi|126165296
Scaffold rerun with new version	Uncategorized Sample	300mM no BAF	S_300mM_no_BAF.RAW (F001830)	PREDICTED: similar to histone 1, H2ai (predicted) isoform 1 [Canis	gi|74003971		28977.8	1	7	8	23	0.00161	0.239	KLPFQR	R	L	0.777	37.2	48.1	0	2	0	0	2	788.478	65	70	TRUE
Scaffold rerun with new version	Uncategorized Sample	300mM no BAF	S_300mM_no_BAF.RAW (F001830)	PREDICTED: similar to histone 1, H2ai (predicted) isoform 1 [Canis	gi|74003971		28977.8	1	7	8	23	0.00161	0.239	QVHPDTGISSK	K	A	0.95	43.6	46.5	0	3	1	0	2	1168.6	181	191	TRUE	gi|10800140,gi|27693390,gi|46049029,gi|13386452,gi|109017921,gi|55589506,gi|109070012,gi|74004213,gi|4504277,gi|61835422,gi|68532405,gi|61827353,gi|20336754,gi|31979,gi|184086,gi|68226431,gi|28173554,gi|32113,gi|73975428,gi|16306566,gi|126165296
Scaffold rerun with new version	Uncategorized Sample	300mM no BAF	S_300mM_no_BAF.RAW (F001830)	PREDICTED: similar to histone 1, H2ai (predicted) isoform 1 [Canis	gi|74003971		28977.8	1	7	8	23	0.00161	0.239	STELLIR	K	K	0.632	29.3	48	1	0	0	0	2	831.494	58	64	TRUE	gi|109073005
Scaffold rerun with new version	Uncategorized Sample	300mM no BAF	S_300mM_no_BAF.RAW (F001830)	lamin A/C isoform 1 precursor [Homo sapiens], gi|125962|sp|P02545|LMNA_HUMAN Lamin-A/C (70 kDa lamin) (Renal carcinoma antigen NY-REN-32), gi|54035059|gb|AAH14507.1| Lamin A/C [Homo sapiens], gi|55957498|emb|CAI15522.1| lamin A/C [Homo sapiens], gi|190690113|gb|ACE86831.1| lamin A/C protein [synthetic construct], gi|190691485|gb|ACE87517.1| lamin A/C protein [synthetic construct] [MASS=74139]	gi|27436946,gi|57014043		74122.6	1	24	27	54	0.00378	0.381	AQNTWGCGNSLR	K	T	0.95	60	46.7	0	1	0	0	2	1363.62	516	527	TRUE
Scaffold rerun with new version	Uncategorized Sample	300mM no BAF	S_300mM_no_BAF.RAW (F001830)	lamin A/C isoform 1 precursor [Homo sapiens], gi|125962|sp|P02545|LMNA_HUMAN Lamin-A/C (70 kDa lamin) (Renal carcinoma antigen NY-REN-32), gi|54035059|gb|AAH14507.1| Lamin A/C [Homo sapiens], gi|55957498|emb|CAI15522.1| lamin A/C [Homo sapiens], gi|190690113|gb|ACE86831.1| lamin A/C protein [synthetic construct], gi|190691485|gb|ACE87517.1| lamin A/C protein [synthetic construct] [MASS=74139]	gi|27436946,gi|57014043		74122.6	1	24	27	54	0.00378	0.381	ASASGSGAQVGGPISSGSSASSVTVTR	K	S	0.95	123	45	0	3	0	0	2	2365.16	598	624	TRUE
Scaffold rerun with new version	Uncategorized Sample	300mM no BAF	S_300mM_no_BAF.RAW (F001830)	lamin A/C isoform 1 precursor [Homo sapiens], gi|125962|sp|P02545|LMNA_HUMAN Lamin-A/C (70 kDa lamin) (Renal carcinoma antigen NY-REN-32), gi|54035059|gb|AAH14507.1| Lamin A/C [Homo sapiens], gi|55957498|emb|CAI15522.1| lamin A/C [Homo sapiens], gi|190690113|gb|ACE86831.1| lamin A/C protein [synthetic construct], gi|190691485|gb|ACE87517.1| lamin A/C protein [synthetic construct] [MASS=74139]	gi|27436946,gi|57014043		74122.6	1	24	27	54	0.00378	0.381	DLEDSLAR	R	E	0.95	52.8	47.6	2	0	0	0	2	918.453	322	329	TRUE	gi|74220835
Scaffold rerun with new version	Uncategorized Sample	300mM no BAF	S_300mM_no_BAF.RAW (F001830)	lamin A/C isoform 1 precursor [Homo sapiens], gi|125962|sp|P02545|LMNA_HUMAN Lamin-A/C (70 kDa lamin) (Renal carcinoma antigen NY-REN-32), gi|54035059|gb|AAH14507.1| Lamin A/C [Homo sapiens], gi|55957498|emb|CAI15522.1| lamin A/C [Homo sapiens], gi|190690113|gb|ACE86831.1| lamin A/C protein [synthetic construct], gi|190691485|gb|ACE87517.1| lamin A/C protein [synthetic construct] [MASS=74139]	gi|27436946,gi|57014043		74122.6	1	24	27	54	0.00378	0.381	EDLQELNDR	K	L	0.932	42.1	47	0	1	0	0	2	1131.53	33	41	TRUE	gi|74220835
Scaffold rerun with new version	Uncategorized Sample	300mM no BAF	S_300mM_no_BAF.RAW (F001830)	lamin A/C isoform 1 precursor [Homo sapiens], gi|125962|sp|P02545|LMNA_HUMAN Lamin-A/C (70 kDa lamin) (Renal carcinoma antigen NY-REN-32), gi|54035059|gb|AAH14507.1| Lamin A/C [Homo sapiens], gi|55957498|emb|CAI15522.1| lamin A/C [Homo sapiens], gi|190690113|gb|ACE86831.1| lamin A/C protein [synthetic construct], gi|190691485|gb|ACE87517.1| lamin A/C protein [synthetic construct] [MASS=74139]	gi|27436946,gi|57014043		74122.6	1	24	27	54	0.00378	0.381	EELDFQK	K	N	0.95	52.9	47.1	2	2	0	0	2	908.437	202	208	TRUE	gi|74220835
Scaffold rerun with new version	Uncategorized Sample	300mM no BAF	S_300mM_no_BAF.RAW (F001830)	lamin A/C isoform 1 precursor [Homo sapiens], gi|125962|sp|P02545|LMNA_HUMAN Lamin-A/C (70 kDa lamin) (Renal carcinoma antigen NY-REN-32), gi|54035059|gb|AAH14507.1| Lamin A/C [Homo sapiens], gi|55957498|emb|CAI15522.1| lamin A/C [Homo sapiens], gi|190690113|gb|ACE86831.1| lamin A/C protein [synthetic construct], gi|190691485|gb|ACE87517.1| lamin A/C protein [synthetic construct] [MASS=74139]	gi|27436946,gi|57014043		74122.6	1	24	27	54	0.00378	0.381	ITESEEVVSR	R	E	0.95	67.4	47	0	2	0	0	2	1148.58	63	72	TRUE	gi|74220835
Scaffold rerun with new version	Uncategorized Sample	300mM no BAF	S_300mM_no_BAF.RAW (F001830)	lamin A/C isoform 1 precursor [Homo sapiens], gi|125962|sp|P02545|LMNA_HUMAN Lamin-A/C (70 kDa lamin) (Renal carcinoma antigen NY-REN-32), gi|54035059|gb|AAH14507.1| Lamin A/C [Homo sapiens], gi|55957498|emb|CAI15522.1| lamin A/C [Homo sapiens], gi|190690113|gb|ACE86831.1| lamin A/C protein [synthetic construct], gi|190691485|gb|ACE87517.1| lamin A/C protein [synthetic construct] [MASS=74139]	gi|27436946,gi|57014043		74122.6	1	24	27	54	0.00378	0.381	KEGDLIAAQAR	K	L	0.805	35.9	47	0	0	1	0	2	1171.64	123	133	TRUE	gi|74220835
Scaffold rerun with new version	Uncategorized Sample	300mM no BAF	S_300mM_no_BAF.RAW (F001830)	lamin A/C isoform 1 precursor [Homo sapiens], gi|125962|sp|P02545|LMNA_HUMAN Lamin-A/C (70 kDa lamin) (Renal carcinoma antigen NY-REN-32), gi|54035059|gb|AAH14507.1| Lamin A/C [Homo sapiens], gi|55957498|emb|CAI15522.1| lamin A/C [Homo sapiens], gi|190690113|gb|ACE86831.1| lamin A/C protein [synthetic construct], gi|190691485|gb|ACE87517.1| lamin A/C protein [synthetic construct] [MASS=74139]	gi|27436946,gi|57014043		74122.6	1	24	27	54	0.00378	0.381	KLLEGEEER	R	L	0.95	50.8	47.3	0	3	0	0	2	1102.57	378	386	TRUE	gi|5031877,gi|73987493,gi|74220835,gi|27436951
Scaffold rerun with new version	Uncategorized Sample	300mM no BAF	S_300mM_no_BAF.RAW (F001830)	lamin A/C isoform 1 precursor [Homo sapiens], gi|125962|sp|P02545|LMNA_HUMAN Lamin-A/C (70 kDa lamin) (Renal carcinoma antigen NY-REN-32), gi|54035059|gb|AAH14507.1| Lamin A/C [Homo sapiens], gi|55957498|emb|CAI15522.1| lamin A/C [Homo sapiens], gi|190690113|gb|ACE86831.1| lamin A/C protein [synthetic construct], gi|190691485|gb|ACE87517.1| lamin A/C protein [synthetic construct] [MASS=74139]	gi|27436946,gi|57014043		74122.6	1	24	27	54	0.00378	0.381	KQLQDEMLR	K	R	0.95	46.8	47.2	0	2	0	0	2	1160.61	181	189	TRUE	gi|74220835
Scaffold rerun with new version	Uncategorized Sample	300mM no BAF	S_300mM_no_BAF.RAW (F001830)	lamin A/C isoform 1 precursor [Homo sapiens], gi|125962|sp|P02545|LMNA_HUMAN Lamin-A/C (70 kDa lamin) (Renal carcinoma antigen NY-REN-32), gi|54035059|gb|AAH14507.1| Lamin A/C [Homo sapiens], gi|55957498|emb|CAI15522.1| lamin A/C [Homo sapiens], gi|190690113|gb|ACE86831.1| lamin A/C protein [synthetic construct], gi|190691485|gb|ACE87517.1| lamin A/C protein [synthetic construct] [MASS=74139]	gi|27436946,gi|57014043		74122.6	1	24	27	54	0.00378	0.381	LADALQELR	R	A	0.95	67.1	46.7	0	1	0	0	2	1028.57	241	249	TRUE	gi|74220835
Scaffold rerun with new version	Uncategorized Sample	300mM no BAF	S_300mM_no_BAF.RAW (F001830)	lamin A/C isoform 1 precursor [Homo sapiens], gi|125962|sp|P02545|LMNA_HUMAN Lamin-A/C (70 kDa lamin) (Renal carcinoma antigen NY-REN-32), gi|54035059|gb|AAH14507.1| Lamin A/C [Homo sapiens], gi|55957498|emb|CAI15522.1| lamin A/C [Homo sapiens], gi|190690113|gb|ACE86831.1| lamin A/C protein [synthetic construct], gi|190691485|gb|ACE87517.1| lamin A/C protein [synthetic construct] [MASS=74139]	gi|27436946,gi|57014043		74122.6	1	24	27	54	0.00378	0.381	LEAALGEAK	K	K	0.95	45.9	47.8	1	3	0	0	2	901.5	172	180	TRUE	gi|74220835
Scaffold rerun with new version	Uncategorized Sample	300mM no BAF	S_300mM_no_BAF.RAW (F001830)	lamin A/C isoform 1 precursor [Homo sapiens], gi|125962|sp|P02545|LMNA_HUMAN Lamin-A/C (70 kDa lamin) (Renal carcinoma antigen NY-REN-32), gi|54035059|gb|AAH14507.1| Lamin A/C [Homo sapiens], gi|55957498|emb|CAI15522.1| lamin A/C [Homo sapiens], gi|190690113|gb|ACE86831.1| lamin A/C protein [synthetic construct], gi|190691485|gb|ACE87517.1| lamin A/C protein [synthetic construct] [MASS=74139]	gi|27436946,gi|57014043		74122.6	1	24	27	54	0.00378	0.381	LLEGEEER	K	L	0.95	47.1	47.4	0	2	0	0	2	974.48	379	386	TRUE	gi|5031877,gi|73987493,gi|74220835,gi|27436951
Scaffold rerun with new version	Uncategorized Sample	300mM no BAF	S_300mM_no_BAF.RAW (F001830)	lamin A/C isoform 1 precursor [Homo sapiens], gi|125962|sp|P02545|LMNA_HUMAN Lamin-A/C (70 kDa lamin) (Renal carcinoma antigen NY-REN-32), gi|54035059|gb|AAH14507.1| Lamin A/C [Homo sapiens], gi|55957498|emb|CAI15522.1| lamin A/C [Homo sapiens], gi|190690113|gb|ACE86831.1| lamin A/C protein [synthetic construct], gi|190691485|gb|ACE87517.1| lamin A/C protein [synthetic construct] [MASS=74139]	gi|27436946,gi|57014043		74122.6	1	24	27	54	0.00378	0.381	LQEKEDLQELNDR	R	L	0.95	70.2	46.3	0	1	0	0	2	1629.81	29	41	TRUE	gi|74220835
Scaffold rerun with new version	Uncategorized Sample	300mM no BAF	S_300mM_no_BAF.RAW (F001830)	lamin A/C isoform 1 precursor [Homo sapiens], gi|125962|sp|P02545|LMNA_HUMAN Lamin-A/C (70 kDa lamin) (Renal carcinoma antigen NY-REN-32), gi|54035059|gb|AAH14507.1| Lamin A/C [Homo sapiens], gi|55957498|emb|CAI15522.1| lamin A/C [Homo sapiens], gi|190690113|gb|ACE86831.1| lamin A/C protein [synthetic construct], gi|190691485|gb|ACE87517.1| lamin A/C protein [synthetic construct] [MASS=74139]	gi|27436946,gi|57014043		74122.6	1	24	27	54	0.00378	0.381	LQLELSK	R	V	0.95	48.3	48	0	3	0	0	2	830.499	102	108	TRUE	gi|74220835
Scaffold rerun with new version	Uncategorized Sample	300mM no BAF	S_300mM_no_BAF.RAW (F001830)	lamin A/C isoform 1 precursor [Homo sapiens], gi|125962|sp|P02545|LMNA_HUMAN Lamin-A/C (70 kDa lamin) (Renal carcinoma antigen NY-REN-32), gi|54035059|gb|AAH14507.1| Lamin A/C [Homo sapiens], gi|55957498|emb|CAI15522.1| lamin A/C [Homo sapiens], gi|190690113|gb|ACE86831.1| lamin A/C protein [synthetic construct], gi|190691485|gb|ACE87517.1| lamin A/C protein [synthetic construct] [MASS=74139]	gi|27436946,gi|57014043		74122.6	1	24	27	54	0.00378	0.381	LRDLEDSLAR	K	E	0.941	42.8	46.9	0	2	0	0	2	1187.64	320	329	TRUE	gi|74220835
Scaffold rerun with new version	Uncategorized Sample	300mM no BAF	S_300mM_no_BAF.RAW (F001830)	lamin A/C isoform 1 precursor [Homo sapiens], gi|125962|sp|P02545|LMNA_HUMAN Lamin-A/C (70 kDa lamin) (Renal carcinoma antigen NY-REN-32), gi|54035059|gb|AAH14507.1| Lamin A/C [Homo sapiens], gi|55957498|emb|CAI15522.1| lamin A/C [Homo sapiens], gi|190690113|gb|ACE86831.1| lamin A/C protein [synthetic construct], gi|190691485|gb|ACE87517.1| lamin A/C protein [synthetic construct] [MASS=74139]	gi|27436946,gi|57014043		74122.6	1	24	27	54	0.00378	0.381	LVEIDNGK	R	Q	0.95	48.5	48.1	2	2	0	0	2	887.484	226	233	TRUE	gi|74220835
Scaffold rerun with new version	Uncategorized Sample	300mM no BAF	S_300mM_no_BAF.RAW (F001830)	lamin A/C isoform 1 precursor [Homo sapiens], gi|125962|sp|P02545|LMNA_HUMAN Lamin-A/C (70 kDa lamin) (Renal carcinoma antigen NY-REN-32), gi|54035059|gb|AAH14507.1| Lamin A/C [Homo sapiens], gi|55957498|emb|CAI15522.1| lamin A/C [Homo sapiens], gi|190690113|gb|ACE86831.1| lamin A/C protein [synthetic construct], gi|190691485|gb|ACE87517.1| lamin A/C protein [synthetic construct] [MASS=74139]	gi|27436946,gi|57014043		74122.6	1	24	27	54	0.00378	0.381	MQQQLDEYQELLDIK	R	L	0.635	31.8	45.6	0	1	0	0	2	1893.93	352	366	TRUE	gi|74220835
Scaffold rerun with new version	Uncategorized Sample	300mM no BAF	S_300mM_no_BAF.RAW (F001830)	lamin A/C isoform 1 precursor [Homo sapiens], gi|125962|sp|P02545|LMNA_HUMAN Lamin-A/C (70 kDa lamin) (Renal carcinoma antigen NY-REN-32), gi|54035059|gb|AAH14507.1| Lamin A/C [Homo sapiens], gi|55957498|emb|CAI15522.1| lamin A/C [Homo sapiens], gi|190690113|gb|ACE86831.1| lamin A/C protein [synthetic construct], gi|190691485|gb|ACE87517.1| lamin A/C protein [synthetic construct] [MASS=74139]	gi|27436946,gi|57014043		74122.6	1	24	27	54	0.00378	0.381	NSNLVGAAHEELQQSR	R	I	0.95	76.6	45.9	0	2	0	0	2	1752.86	281	296	TRUE	gi|74220835
Scaffold rerun with new version	Uncategorized Sample	300mM no BAF	S_300mM_no_BAF.RAW (F001830)	lamin A/C isoform 1 precursor [Homo sapiens], gi|125962|sp|P02545|LMNA_HUMAN Lamin-A/C (70 kDa lamin) (Renal carcinoma antigen NY-REN-32), gi|54035059|gb|AAH14507.1| Lamin A/C [Homo sapiens], gi|55957498|emb|CAI15522.1| lamin A/C [Homo sapiens], gi|190690113|gb|ACE86831.1| lamin A/C protein [synthetic construct], gi|190691485|gb|ACE87517.1| lamin A/C protein [synthetic construct] [MASS=74139]	gi|27436946,gi|57014043		74122.6	1	24	27	54	0.00378	0.381	SGAQASSTPLSPTR	R	I	0.95	62.4	46.8	0	3	0	0	2	1359.69	12	25	TRUE	gi|74220835
Scaffold rerun with new version	Uncategorized Sample	300mM no BAF	S_300mM_no_BAF.RAW (F001830)	lamin A/C isoform 1 precursor [Homo sapiens], gi|125962|sp|P02545|LMNA_HUMAN Lamin-A/C (70 kDa lamin) (Renal carcinoma antigen NY-REN-32), gi|54035059|gb|AAH14507.1| Lamin A/C [Homo sapiens], gi|55957498|emb|CAI15522.1| lamin A/C [Homo sapiens], gi|190690113|gb|ACE86831.1| lamin A/C protein [synthetic construct], gi|190691485|gb|ACE87517.1| lamin A/C protein [synthetic construct] [MASS=74139]	gi|27436946,gi|57014043		74122.6	1	24	27	54	0.00378	0.381	SLETENAGLR	R	L	0.95	57	47.3	0	2	0	0	2	1089.55	51	60	TRUE	gi|74220835
Scaffold rerun with new version	Uncategorized Sample	300mM no BAF	S_300mM_no_BAF.RAW (F001830)	lamin A/C isoform 1 precursor [Homo sapiens], gi|125962|sp|P02545|LMNA_HUMAN Lamin-A/C (70 kDa lamin) (Renal carcinoma antigen NY-REN-32), gi|54035059|gb|AAH14507.1| Lamin A/C [Homo sapiens], gi|55957498|emb|CAI15522.1| lamin A/C [Homo sapiens], gi|190690113|gb|ACE86831.1| lamin A/C protein [synthetic construct], gi|190691485|gb|ACE87517.1| lamin A/C protein [synthetic construct] [MASS=74139]	gi|27436946,gi|57014043		74122.6	1	24	27	54	0.00378	0.381	SNEDQSMGNWQIK	K	R	0.95	76	46.3	0	2	0	0	2	1536.68	458	470	TRUE
Scaffold rerun with new version	Uncategorized Sample	300mM no BAF	S_300mM_no_BAF.RAW (F001830)	lamin A/C isoform 1 precursor [Homo sapiens], gi|125962|sp|P02545|LMNA_HUMAN Lamin-A/C (70 kDa lamin) (Renal carcinoma antigen NY-REN-32), gi|54035059|gb|AAH14507.1| Lamin A/C [Homo sapiens], gi|55957498|emb|CAI15522.1| lamin A/C [Homo sapiens], gi|190690113|gb|ACE86831.1| lamin A/C protein [synthetic construct], gi|190691485|gb|ACE87517.1| lamin A/C protein [synthetic construct] [MASS=74139]	gi|27436946,gi|57014043		74122.6	1	24	27	54	0.00378	0.381	SVGGSGGGSFGDNLVTR	R	S	0.95	83.9	46.2	0	1	0	0	2	1566.75	628	644	TRUE
Scaffold rerun with new version	Uncategorized Sample	300mM no BAF	S_300mM_no_BAF.RAW (F001830)	lamin A/C isoform 1 precursor [Homo sapiens], gi|125962|sp|P02545|LMNA_HUMAN Lamin-A/C (70 kDa lamin) (Renal carcinoma antigen NY-REN-32), gi|54035059|gb|AAH14507.1| Lamin A/C [Homo sapiens], gi|55957498|emb|CAI15522.1| lamin A/C [Homo sapiens], gi|190690113|gb|ACE86831.1| lamin A/C protein [synthetic construct], gi|190691485|gb|ACE87517.1| lamin A/C protein [synthetic construct] [MASS=74139]	gi|27436946,gi|57014043		74122.6	1	24	27	54	0.00378	0.381	TALINSTGEEVAMR	R	K	0.95	97.3	46.4	0	5	0	0	2	1491.75	528	541	TRUE	gi|74220835
Scaffold rerun with new version	Uncategorized Sample	300mM no BAF	S_300mM_no_BAF.RAW (F001830)	lamin A/C isoform 1 precursor [Homo sapiens], gi|125962|sp|P02545|LMNA_HUMAN Lamin-A/C (70 kDa lamin) (Renal carcinoma antigen NY-REN-32), gi|54035059|gb|AAH14507.1| Lamin A/C [Homo sapiens], gi|55957498|emb|CAI15522.1| lamin A/C [Homo sapiens], gi|190690113|gb|ACE86831.1| lamin A/C protein [synthetic construct], gi|190691485|gb|ACE87517.1| lamin A/C protein [synthetic construct] [MASS=74139]	gi|27436946,gi|57014043		74122.6	1	24	27	54	0.00378	0.381	TVLCGTCGQPADK	R	A	0.95	45.8	46.4	0	2	0	0	2	1406.64	585	597	TRUE
Scaffold rerun with new version	Uncategorized Sample	300mM no BAF	S_300mM_no_BAF.RAW (F001830)	RecName: Full=Serum albumin; AltName: Full=BSA; AltName:	gi|1351907,gi|30794280,gi|74267962		69306.2	0.908	1	1	2	0.00014	0.0181	HLVDEPQNLIK	K	Q	0.95	45.4	46.6	0	2	0	0	2	1305.72	402	412	TRUE	gi|229552
Scaffold rerun with new version	Uncategorized Sample	300mM no BAF	S_300mM_no_BAF.RAW (F001830)	RecName: Full=Histone H1.1; AltName: Full=CTL-1.	gi|121903,gi|45479844,gi|4885375,gi|68534962,gi|74003979		21347.8	0.998	2	3	9	0.00063	0.0939	ALAAAGYDVEK	K	N	0.95	81	47	2	3	0	0	2	1107.57	65	75	TRUE	gi|57110429,gi|74004254
Scaffold rerun with new version	Uncategorized Sample	300mM no BAF	S_300mM_no_BAF.RAW (F001830)	RecName: Full=Histone H1.1; AltName: Full=CTL-1.	gi|121903,gi|45479844,gi|4885375,gi|68534962,gi|74003979		21347.8	0.998	2	3	9	0.00063	0.0939	SGVSLAALK	R	K	0.95	69.2	48.1	0	4	0	0	2	845.51	55	63	TRUE
Scaffold rerun with new version	Uncategorized Sample	300mM no BAF	S_300mM_no_BAF.RAW (F001830)	Snrpf protein [Mus musculus].	gi|41946811,gi|4507131,gi|73978207,gi|74189295,gi|74353864,gi|83027678,gi|94372795		30516.6	0.908	1	1	2	0.00014	0.0464	GVEEEEEDGEMRE	R	-	0.95	79.4	46.1	0	2	0	0	2	1537.6	268	280	TRUE
Scaffold rerun with new version	Uncategorized Sample	300mM no BAF	S_300mM_no_BAF.RAW (F001830)	histone cluster 1, H2bn [Bos taurus].	gi|126165296		13905.5	0.908	1	1	2	0.00014	0.286	AMGNMNSFVNDIFER	K	I	0.95	72.4	46	0	2	0	0	2	1744.78	59	73	TRUE
Scaffold rerun with new version	Uncategorized Sample	300mM no BAF	S_300mM_no_BAF.RAW (F001830)	histone cluster 1, H2bn [Bos taurus].	gi|126165296		13905.5	0.908	1	1	2	0.00014	0.286	KESYSVYVYK	R	V	0.95	53.8	46.7	0	2	0	0	2	1265.64	35	44	FALSE	gi|74003971
Scaffold rerun with new version	Uncategorized Sample	300mM no BAF	S_300mM_no_BAF.RAW (F001830)	histone cluster 1, H2bn [Bos taurus].	gi|126165296		13905.5	0.908	1	1	2	0.00014	0.286	QVHPDTGISSK	K	A	0.95	43.6	46.5	0	3	1	0	2	1168.6	48	58	FALSE	gi|10800140,gi|27693390,gi|46049029,gi|13386452,gi|109017921,gi|55589506,gi|109070012,gi|74004213,gi|4504277,gi|74003971,gi|61835422,gi|68532405,gi|61827353,gi|20336754,gi|31979,gi|184086,gi|68226431,gi|28173554,gi|32113,gi|73975428,gi|16306566
Scaffold rerun with new version	Uncategorized Sample	300mM no BAF	S_300mM_no_BAF.RAW (F001830)	Try10-like trypsinogen [Mus musculus]	gi|51092303,gi|84781771		26202.7	0.908	1	1	2	0.00014	0.0407	TLDNDIMLIK	K	L	0.95	63.6	47	0	2	0	0	2	1175.63	103	112	TRUE
Scaffold rerun with new version	Uncategorized Sample	300mM no BAF	S_300mM_no_BAF.RAW (F001830)	Keratin, type II cytoskeletal 1 (Cytokeratin-1) (CK-1) (Keratin-1) (K1) (Type II keratin Kb1)	gi|81891716		0	0.908	1	1	1	7e-05	0	DYQELMNTK	-	-	0.95	47.8	46.9	0	2	0	0	2	1141.52	1	0	FALSE	gi|11935049,gi|109096823,gi|109096825,gi|109096827,gi|109096829
Scaffold rerun with new version	Uncategorized Sample	300mM no BAF	S_300mM_no_BAF.RAW (F001830)	Keratin, type II cytoskeletal 1 (Cytokeratin-1) (CK-1) (Keratin-1) (K1) (Type II keratin Kb1)	gi|81891716		0	0.908	1	1	1	7e-05	0	FASFIDK	-	-	0.818	37.4	47.2	0	2	0	0	2	827.43	1	0	FALSE	gi|109096781,gi|18999435,gi|109096797,gi|47132620,gi|109096795,gi|109096789,gi|547754,gi|109096793,gi|293686
Scaffold rerun with new version	Uncategorized Sample	300mM no BAF	S_300mM_no_BAF.RAW (F001830)	Keratin, type II cytoskeletal 1 (Cytokeratin-1) (CK-1) (Keratin-1) (K1) (Type II keratin Kb1)	gi|81891716		0	0.908	1	1	1	7e-05	0	SLNDKFASFIDK	-	-	0.95	43.5	46.4	0	1	0	0	2	1384.71	1	0	TRUE
Scaffold rerun with new version	Uncategorized Sample	300mM no BAF	S_300mM_no_BAF.RAW (F001830)	Keratin, type II cytoskeletal 1 (Cytokeratin-1) (CK-1) (Keratin-1) (K1) (Type II keratin Kb1)	gi|81891716		0	0.908	1	1	1	7e-05	0	TNAENEFVTIK	-	-	0.95	77.8	46.7	0	2	0	0	2	1265.64	1	0	FALSE	gi|11935049,gi|109096823,gi|109096825,gi|109096827,gi|109096829
Scaffold rerun with new version	Uncategorized Sample	300mM no BAF	S_300mM_no_BAF.RAW (F001830)	unnamed protein product [Mus musculus].	gi|12843046,gi|71043961		26404.1	0.908	1	2	2	0.00014	0.0486	YVNWIQQTIAAN	K	-	0.95	48.3	46.6	1	1	0	0	2	1420.72	236	247	TRUE
Scaffold rerun with new version	Uncategorized Sample	300mM no BAF	S_300mM_no_BAF.RAW (F001830)	unnamed protein product [Homo sapiens].	gi|28590		69277.9	0.908	1	1	2	0.00014	0.0246	KVPEVSTPTLVEVSR	K	N	0.95	70	46	0	2	0	0	2	1640.92	438	452	TRUE
Scaffold rerun with new version	Uncategorized Sample	300mM no BAF	S_300mM_no_BAF.RAW (F001830)	Chain A, Crystal Structure Of Enhancer Of Rudimentary Homologue	gi|66360372		12734	0.908	1	1	2	0.00014	0.252	ADTQTYQPYNK	R	D	0.934	41.9	46.6	0	2	0	0	2	1328.61	81	91	FALSE	gi|4758302,gi|73964238
Scaffold rerun with new version	Uncategorized Sample	300mM no BAF	S_300mM_no_BAF.RAW (F001830)	Chain A, Crystal Structure Of Enhancer Of Rudimentary Homologue	gi|66360372		12734	0.908	1	1	2	0.00014	0.252	TYADYESVNECXEGVCK	R	X	0.95	54.5	45.5	0	2	0	0	2	1920.73	25	41	TRUE
Scaffold rerun with new version	Uncategorized Sample	300mM no BAF	S_300mM_no_BAF.RAW (F001830)	PREDICTED: similar to 60S ribosomal protein L17 (L23) [Macaca	gi|109048490,gi|109111503,gi|109113585,gi|22001904,gi|28174920,gi|28189725,gi|28189865,gi|42542645,gi|42627879,gi|4506617,gi|57095306,gi|62638830,gi|63101541,gi|73962149,gi|73962151,gi|73962154,gi|73962156,gi|73974342,gi|73977961,gi|73977963,gi|73990257,gi|73990259		21379.5	0.908	1	1	2	0.00014	0.0543	YSLDPENPTK	R	S	0.95	56.2	46.9	0	2	0	0	2	1163.56	4	13	TRUE
Scaffold rerun with new version	Uncategorized Sample	300mM no BAF	S_300mM_no_BAF.RAW (F001830)	heterogeneous nuclear ribonucleoprotein A2/B1 isoform 1 [Mus	gi|109134362,gi|124028629,gi|14043072,gi|197101465,gi|32880197,gi|3329498,gi|37747847,gi|4504447,gi|73976110,gi|73976114,gi|73976122,gi|73976124,gi|73976128,gi|73976130,gi|73976132,gi|75074832		32442.9	0.998	2	2	3	0.00021	0.133	GGGGNFGPGPGSNFR	R	G	0.95	44.9	46.5	0	1	0	0	2	1377.63	202	216	TRUE
Scaffold rerun with new version	Uncategorized Sample	300mM no BAF	S_300mM_no_BAF.RAW (F001830)	heterogeneous nuclear ribonucleoprotein A2/B1 isoform 1 [Mus	gi|109134362,gi|124028629,gi|14043072,gi|197101465,gi|32880197,gi|3329498,gi|37747847,gi|4504447,gi|73976110,gi|73976114,gi|73976122,gi|73976124,gi|73976128,gi|73976130,gi|73976132,gi|75074832		32442.9	0.998	2	2	3	0.00021	0.133	NMGGPYGGGNYGPGGSGGSGGYGGR	R	S	0.95	138	45.1	0	2	0	0	2	2189.91	274	298	TRUE
Scaffold rerun with new version	Uncategorized Sample	300mM no BAF	S_300mM_no_BAF.RAW (F001830)	PREDICTED: RNA, U3 small nucleolar interacting protein 2 [Macaca	gi|109039317,gi|21704248,gi|4759276		51822.9	0.996	2	2	4	0.00028	0.04	AFEEDQVAGR	R	L	0.95	45.9	47.1	0	2	0	0	2	1121.52	102	111	TRUE
Scaffold rerun with new version	Uncategorized Sample	300mM no BAF	S_300mM_no_BAF.RAW (F001830)	PREDICTED: RNA, U3 small nucleolar interacting protein 2 [Macaca	gi|109039317,gi|21704248,gi|4759276		51822.9	0.996	2	2	4	0.00028	0.04	DAVSGLAFR	R	R	0.912	41.2	47.3	0	2	0	0	2	935.495	242	250	TRUE
Scaffold rerun with new version	Uncategorized Sample	300mM no BAF	S_300mM_no_BAF.RAW (F001830)	PREDICTED: similar to heterogeneous nuclear ribonucleoprotein L isoform a isoform 3 [Macaca mulatta]	gi|109124618,gi|11527777,gi|133274,gi|52632383,gi|52632385,gi|57036575,gi|67971924,gi|73947704		60169.1	1	4	4	7	0.00049	0.131	ASLNGADIYSGCCTLK	K	I	0.95	63.2	46.1	0	2	0	0	2	1729.79	218	233	TRUE
Scaffold rerun with new version	Uncategorized Sample	300mM no BAF	S_300mM_no_BAF.RAW (F001830)	PREDICTED: similar to heterogeneous nuclear ribonucleoprotein L isoform a isoform 3 [Macaca mulatta]	gi|109124618,gi|11527777,gi|133274,gi|52632383,gi|52632385,gi|57036575,gi|67971924,gi|73947704		60169.1	1	4	4	7	0.00049	0.131	NDQDTWDYTNPNLSGQGDPGSNPNKR	K	Q	0.95	83	44.1	0	0	1	0	2	2890.26	247	272	TRUE
Scaffold rerun with new version	Uncategorized Sample	300mM no BAF	S_300mM_no_BAF.RAW (F001830)	PREDICTED: similar to heterogeneous nuclear ribonucleoprotein L isoform a isoform 3 [Macaca mulatta]	gi|109124618,gi|11527777,gi|133274,gi|52632383,gi|52632385,gi|57036575,gi|67971924,gi|73947704		60169.1	1	4	4	7	0.00049	0.131	QPAIMPGQSYGLEDGSCSYK	K	D	0.95	99.2	45	0	2	0	0	2	2187.97	425	444	TRUE
Scaffold rerun with new version	Uncategorized Sample	300mM no BAF	S_300mM_no_BAF.RAW (F001830)	PREDICTED: similar to heterogeneous nuclear ribonucleoprotein L isoform a isoform 3 [Macaca mulatta]	gi|109124618,gi|11527777,gi|133274,gi|52632383,gi|52632385,gi|57036575,gi|67971924,gi|73947704		60169.1	1	4	4	7	0.00049	0.131	SSSGLLEWESK	R	S	0.95	78.5	46.8	0	2	0	0	2	1222.6	511	521	TRUE
Scaffold rerun with new version	Uncategorized Sample	300mM no BAF	S_300mM_no_BAF.RAW (F001830)	PREDICTED: similar to Histone H1.5 (Histone H1a) [Canis familiaris]	gi|57110429,gi|74004254		0	0.908	1	1	1	7e-05	0	ALAAAGYDVEK	-	-	0.95	81	47	2	3	0	0	2	1107.57	1	0	FALSE	gi|68534962,gi|4885375,gi|121903,gi|74003979,gi|45479844
Scaffold rerun with new version	Uncategorized Sample	300mM no BAF	S_300mM_no_BAF.RAW (F001830)	PREDICTED: similar to Histone H1.5 (Histone H1a) [Canis familiaris]	gi|57110429,gi|74004254		0	0.908	1	1	1	7e-05	0	NGLSLAALK	-	-	0.95	71.7	47.8	0	1	0	0	2	886.536	1	0	TRUE	gi|4885381,gi|109070064,gi|55626268
Scaffold rerun with new version	Uncategorized Sample	300mM no BAF	S_300mM_no_BAF.RAW (F001830)	unnamed protein product [Homo sapiens]	gi|527578		16574.2	0.908	1	1	1	7e-05	0.0929	DLTTAGAVTQCYR	R	D	0.95	50.3	46.3	0	1	0	0	2	1455.69	63	75	TRUE
Scaffold rerun with new version	Uncategorized Sample	300mM no BAF	S_300mM_no_BAF.RAW (F001830)	PREDICTED: similar to Histone H1.5 (Histone H1a) [Macaca mulatta].	gi|109070064,gi|4885381,gi|55626268		22563.7	1	3	3	4	0.00028	0.146	ALAAGGYDVEK	K	N	0.95	72.2	46.9	0	2	0	0	2	1093.55	68	78	TRUE
Scaffold rerun with new version	Uncategorized Sample	300mM no BAF	S_300mM_no_BAF.RAW (F001830)	PREDICTED: similar to Histone H1.5 (Histone H1a) [Macaca mulatta].	gi|109070064,gi|4885381,gi|55626268		22563.7	1	3	3	4	0.00028	0.146	ATGPPVSELITK	K	A	0.907	40	46.4	0	1	0	0	2	1212.68	38	49	TRUE
Scaffold rerun with new version	Uncategorized Sample	300mM no BAF	S_300mM_no_BAF.RAW (F001830)	PREDICTED: similar to Histone H1.5 (Histone H1a) [Macaca mulatta].	gi|109070064,gi|4885381,gi|55626268		22563.7	1	3	3	4	0.00028	0.146	KATGPPVSELITK	R	A	0.95	60	46.7	0	1	0	0	2	1340.78	37	49	TRUE
Scaffold rerun with new version	Uncategorized Sample	300mM no BAF	S_300mM_no_BAF.RAW (F001830)	PREDICTED: similar to Histone H1.5 (Histone H1a) [Macaca mulatta].	gi|109070064,gi|4885381,gi|55626268		22563.7	1	3	3	4	0.00028	0.146	NGLSLAALK	R	K	0.95	71.7	47.8	0	1	0	0	2	886.536	58	66	FALSE	gi|57110429,gi|74004254
Scaffold rerun with new version	Uncategorized Sample	300mM no BAF	S_300mM_no_BAF.RAW (F001830)	PREDICTED: similar to ribosomal protein L19 [Macaca mulatta].	gi|109048759,gi|109072118,gi|109086675,gi|109114839,gi|16798651,gi|24059826,gi|26224758,gi|31873372,gi|4506609,gi|62897725,gi|6677773,gi|73966132		23449.4	0.908	1	1	3	0.00021	0.0867	VWLDPNETNEIANANSR	K	Q	0.95	124	45.5	0	3	0	0	2	1942.93	22	38	TRUE
Scaffold rerun with new version	Uncategorized Sample	300mM no BAF	S_300mM_no_BAF.RAW (F001830)	splicing factor 3b, subunit 4 [Mus musculus].	gi|23346437,gi|5032069,gi|62898205,gi|73981537,gi|75948207,gi|94398719		44368.5	0.908	1	1	3	0.00021	0.033	NQDATVYVGGLDEK	R	V	0.95	104	46.5	0	3	0	0	2	1508.72	10	23	TRUE
Scaffold rerun with new version	Uncategorized Sample	300mM no BAF	S_300mM_no_BAF.RAW (F001830)	RecName: Full=Endophilin-A3; AltName: Full=Endophilin-3; AltName:	gi|10720275,gi|109082177,gi|13676845,gi|20071321,gi|28144914,gi|66794529,gi|73951677,gi|84000273		0	0.908	1	1	1	7e-05	0	IKEILSK	-	-	0.95	47.3	48	1	0	0	0	2	830.535	1	0	TRUE
Scaffold rerun with new version	Uncategorized Sample	300mM no BAF	S_300mM_no_BAF.RAW (F001830)	PREDICTED: similar to tropomyosin 1, alpha isoform c isoform 13	gi|109081379,gi|109081385,gi|109081389,gi|109081393,gi|109081409,gi|109081413,gi|207353,gi|27597085,gi|339958,gi|63252900,gi|78000192,gi|82469907,gi|854189		32831.1	0.998	2	2	4	0.00028	0.0775	AELSEGQVR	R	Q	0.95	50.5	47.5	0	2	0	0	2	988.506	183	191	TRUE
Scaffold rerun with new version	Uncategorized Sample	300mM no BAF	S_300mM_no_BAF.RAW (F001830)	PREDICTED: similar to tropomyosin 1, alpha isoform c isoform 13	gi|109081379,gi|109081385,gi|109081389,gi|109081393,gi|109081409,gi|109081413,gi|207353,gi|27597085,gi|339958,gi|63252900,gi|78000192,gi|82469907,gi|854189		32831.1	0.998	2	2	4	0.00028	0.0775	ATDAEADVASLNR	K	R	0.95	71.8	47	0	2	0	0	2	1332.64	78	90	TRUE
Scaffold rerun with new version	Uncategorized Sample	300mM no BAF	S_300mM_no_BAF.RAW (F001830)	enhancer of rudimentary homolog [Homo sapiens], gi|6679685|ref|NP_031977.1| enhancer of rudimentary homolog [Mus musculus], gi|77735625|ref|NP_001029508.1| enhancer of rudimentary homolog [Bos taurus], gi|147900462|ref|NP_001083823.1| enhancer of rudimentary homologue ERH [Xenopus laevis], gi|55640957|ref|XP_510031.1| PREDICTED: enhancer of rudimentary homolog isoform 2 [Pan troglodytes], gi|1090…	gi|4758302,gi|73964238		12241.3	0.997	2	2	3	0.00021	0.269	ADTQTYQPYNK	R	D	0.934	41.9	46.6	0	2	0	0	2	1328.61	74	84	TRUE	gi|66360372
Scaffold rerun with new version	Uncategorized Sample	300mM no BAF	S_300mM_no_BAF.RAW (F001830)	enhancer of rudimentary homolog [Homo sapiens], gi|6679685|ref|NP_031977.1| enhancer of rudimentary homolog [Mus musculus], gi|77735625|ref|NP_001029508.1| enhancer of rudimentary homolog [Bos taurus], gi|147900462|ref|NP_001083823.1| enhancer of rudimentary homologue ERH [Xenopus laevis], gi|55640957|ref|XP_510031.1| PREDICTED: enhancer of rudimentary homolog isoform 2 [Pan troglodytes], gi|1090…	gi|4758302,gi|73964238		12241.3	0.997	2	2	3	0.00021	0.269	TYADYESVNECMEGVCK	R	M	0.95	77	45.4	0	1	0	0	2	2054.81	18	34	TRUE
Scaffold rerun with new version	Uncategorized Sample	300mM no BAF	S_300mM_no_BAF.RAW (F001830)	PREDICTED: similar to heat shock protein 8 [Rattus norvegicus].	gi|109464859,gi|123647,gi|13242237,gi|13399491,gi|16041102,gi|24234686,gi|309319,gi|347019,gi|42542422,gi|428,gi|56403676,gi|5729877,gi|6137547,gi|6137549,gi|62896815,gi|62897129,gi|63101351,gi|6729733,gi|6729825,gi|73954621,gi|73954623,gi|74012289,gi|74012291,gi|74142813,gi|74143862,gi|74181586,gi|74184057,gi|74186087,gi|74190799,gi|74191381,gi|74198978,gi|74208631,gi|74211667,gi|74214176,gi|742…		0	1	4	4	5	0.00035	0	FDDAVVQSDMK	-	-	0.891	39.5	46.7	0	1	0	0	2	1254.57	1	0	TRUE
Scaffold rerun with new version	Uncategorized Sample	300mM no BAF	S_300mM_no_BAF.RAW (F001830)	PREDICTED: similar to heat shock protein 8 [Rattus norvegicus].	gi|109464859,gi|123647,gi|13242237,gi|13399491,gi|16041102,gi|24234686,gi|309319,gi|347019,gi|42542422,gi|428,gi|56403676,gi|5729877,gi|6137547,gi|6137549,gi|62896815,gi|62897129,gi|63101351,gi|6729733,gi|6729825,gi|73954621,gi|73954623,gi|74012289,gi|74012291,gi|74142813,gi|74143862,gi|74181586,gi|74184057,gi|74186087,gi|74190799,gi|74191381,gi|74198978,gi|74208631,gi|74211667,gi|74214176,gi|742…		0	1	4	4	5	0.00035	0	FEELNADLFR	-	-	0.548	31.4	46.6	0	1	0	0	2	1253.62	1	0	TRUE
Scaffold rerun with new version	Uncategorized Sample	300mM no BAF	S_300mM_no_BAF.RAW (F001830)	PREDICTED: similar to heat shock protein 8 [Rattus norvegicus].	gi|109464859,gi|123647,gi|13242237,gi|13399491,gi|16041102,gi|24234686,gi|309319,gi|347019,gi|42542422,gi|428,gi|56403676,gi|5729877,gi|6137547,gi|6137549,gi|62896815,gi|62897129,gi|63101351,gi|6729733,gi|6729825,gi|73954621,gi|73954623,gi|74012289,gi|74012291,gi|74142813,gi|74143862,gi|74181586,gi|74184057,gi|74186087,gi|74190799,gi|74191381,gi|74198978,gi|74208631,gi|74211667,gi|74214176,gi|742…		0	1	4	4	5	0.00035	0	SQIHDIVLVGGSTR	-	-	0.95	45.4	46.3	0	1	0	0	2	1481.81	1	0	TRUE
Scaffold rerun with new version	Uncategorized Sample	300mM no BAF	S_300mM_no_BAF.RAW (F001830)	PREDICTED: similar to heat shock protein 8 [Rattus norvegicus].	gi|109464859,gi|123647,gi|13242237,gi|13399491,gi|16041102,gi|24234686,gi|309319,gi|347019,gi|42542422,gi|428,gi|56403676,gi|5729877,gi|6137547,gi|6137549,gi|62896815,gi|62897129,gi|63101351,gi|6729733,gi|6729825,gi|73954621,gi|73954623,gi|74012289,gi|74012291,gi|74142813,gi|74143862,gi|74181586,gi|74184057,gi|74186087,gi|74190799,gi|74191381,gi|74198978,gi|74208631,gi|74211667,gi|74214176,gi|742…		0	1	4	4	5	0.00035	0	TTPSYVAFTDTER	-	-	0.95	79.2	46.3	0	2	0	0	2	1487.7	1	0	TRUE	gi|32451998,gi|40254806,gi|56749085,gi|193983,gi|73853769,gi|6016261,gi|47523308,gi|6729803,gi|50978734,gi|14010867,gi|75077423,gi|56757663,gi|197098904,gi|124339829,gi|124339826,gi|74178877,gi|47059179,gi|42543698,gi|167466173,gi|2495339,gi|386785,gi|4529892,gi|62089222,gi|4529893
Scaffold rerun with new version	Uncategorized Sample	300mM no BAF	S_300mM_no_BAF.RAW (F001830)	PREDICTED: similar to Myosin regulatory light chain 2,	gi|109121665,gi|15809016,gi|197100396,gi|2119367,gi|21326175,gi|228542,gi|5453740,gi|57089773,gi|62751407,gi|73961895,gi|74226082,gi|8393781		20440	0.998	3	3	4	0.00028	0.226	DGFIDKEDLHDMLASLGK	R	N	0.727	33.4	45.4	0	1	0	0	2	2003.98	51	68	TRUE
Scaffold rerun with new version	Uncategorized Sample	300mM no BAF	S_300mM_no_BAF.RAW (F001830)	PREDICTED: similar to Myosin regulatory light chain 2,	gi|109121665,gi|15809016,gi|197100396,gi|2119367,gi|21326175,gi|228542,gi|5453740,gi|57089773,gi|62751407,gi|73961895,gi|74226082,gi|8393781		20440	0.998	3	3	4	0.00028	0.226	FTDEEVDELYR	R	E	0.95	72.4	46.5	0	2	0	0	2	1415.63	139	149	TRUE
Scaffold rerun with new version	Uncategorized Sample	300mM no BAF	S_300mM_no_BAF.RAW (F001830)	PREDICTED: similar to Myosin regulatory light chain 2,	gi|109121665,gi|15809016,gi|197100396,gi|2119367,gi|21326175,gi|228542,gi|5453740,gi|57089773,gi|62751407,gi|73961895,gi|74226082,gi|8393781		20440	0.998	3	3	4	0.00028	0.226	LNGTDPEDVIR	K	N	0.82	36.9	46.6	0	1	0	0	2	1228.62	99	109	TRUE
Scaffold rerun with new version	Uncategorized Sample	300mM no BAF	S_300mM_no_BAF.RAW (F001830)	DEAD (Asp-Glu-Ala-Asp) box polypeptide 5 [Pongo abelii]	gi|197099326,gi|226021,gi|33096800,gi|4758138,gi|62089424,gi|73965221,gi|73965223,gi|73965225,gi|73965227,gi|73965229,gi|73965233,gi|73965239,gi|73965241,gi|73965243,gi|74354729,gi|75076425		69131.7	0.998	2	2	2	0.00014	0.0342	APILIATDVASR	K	G	0.95	75.3	46.5	0	1	0	0	2	1226.71	392	403	TRUE
Scaffold rerun with new version	Uncategorized Sample	300mM no BAF	S_300mM_no_BAF.RAW (F001830)	DEAD (Asp-Glu-Ala-Asp) box polypeptide 5 [Pongo abelii]	gi|197099326,gi|226021,gi|33096800,gi|4758138,gi|62089424,gi|73965221,gi|73965223,gi|73965225,gi|73965227,gi|73965229,gi|73965233,gi|73965239,gi|73965241,gi|73965243,gi|74354729,gi|75076425		69131.7	0.998	2	2	2	0.00014	0.0342	TAQEVETYR	R	R	0.95	50.2	46.6	0	1	0	0	2	1096.53	69	77	TRUE
Scaffold rerun with new version	Uncategorized Sample	300mM no BAF	S_300mM_no_BAF.RAW (F001830)	PREDICTED: heat shock 70kDa protein 5 (glucose-regulated protein,	gi|109112233,gi|16507237,gi|197101513		72316.7	0.998	2	2	2	0.00014	0.0367	DAGTIAGLNVMR	K	I	0.95	46.5	46.9	0	1	0	0	2	1217.63	186	197	TRUE
Scaffold rerun with new version	Uncategorized Sample	300mM no BAF	S_300mM_no_BAF.RAW (F001830)	PREDICTED: heat shock 70kDa protein 5 (glucose-regulated protein,	gi|109112233,gi|16507237,gi|197101513		72316.7	0.998	2	2	2	0.00014	0.0367	TWNDPSVQQDIK	R	F	0.95	48.6	46.4	0	1	0	0	2	1430.69	102	113	TRUE
Scaffold rerun with new version	Uncategorized Sample	300mM no BAF	S_300mM_no_BAF.RAW (F001830)	breakpoint cluster region protein 1 [Homo sapiens]	gi|10120888,gi|3002951,gi|4502389		10000.3	1	3	4	11	0.00077	0.213	AYVVLGQFLVLK	K	K	0.95	97.3	46.8	0	4	0	0	2	1349.82	42	53	TRUE	gi|88953904
Scaffold rerun with new version	Uncategorized Sample	300mM no BAF	S_300mM_no_BAF.RAW (F001830)	breakpoint cluster region protein 1 [Homo sapiens]	gi|10120888,gi|3002951,gi|4502389		10000.3	1	3	4	11	0.00077	0.213	DEDLFR	K	E	0.926	40.8	47.1	2	1	0	0	2	794.369	55	60	TRUE
Scaffold rerun with new version	Uncategorized Sample	300mM no BAF	S_300mM_no_BAF.RAW (F001830)	breakpoint cluster region protein 1 [Homo sapiens]	gi|10120888,gi|3002951,gi|4502389		10000.3	1	3	4	11	0.00077	0.213	KDEDLFR	K	E	0.95	66.8	47.3	0	4	0	0	2	922.464	54	60	TRUE
Scaffold rerun with new version	Uncategorized Sample	300mM no BAF	S_300mM_no_BAF.RAW (F001830)	PREDICTED: similar to structure specific recognition protein 1	gi|109106294,gi|111154063,gi|27502780,gi|4507241,gi|54020668,gi|60552474		81059.6	0.98	2	2	2	0.00014	0.0296	SDHPGISITDLSK	K	K	0.95	51.2	46.4	0	1	0	0	2	1369.7	567	579	TRUE
Scaffold rerun with new version	Uncategorized Sample	300mM no BAF	S_300mM_no_BAF.RAW (F001830)	PREDICTED: similar to structure specific recognition protein 1	gi|109106294,gi|111154063,gi|27502780,gi|4507241,gi|54020668,gi|60552474		81059.6	0.98	2	2	2	0.00014	0.0296	VALGHGLK	R	L	0.597	32.4	46.8	0	1	0	0	2	794.489	56	63	TRUE
Scaffold rerun with new version	Uncategorized Sample	300mM no BAF	S_300mM_no_BAF.RAW (F001830)	ribosomal protein S28 [Cricetulus griseus].	gi|12239511,gi|4506715,gi|45268967		7822.9	0.998	2	2	4	0.00028	0.304	EGDVLTLLESER	R	E	0.95	82.4	46.8	0	2	0	0	2	1360.7	52	63	TRUE
Scaffold rerun with new version	Uncategorized Sample	300mM no BAF	S_300mM_no_BAF.RAW (F001830)	ribosomal protein S28 [Cricetulus griseus].	gi|12239511,gi|4506715,gi|45268967		7822.9	0.998	2	2	4	0.00028	0.304	VEFMDDTSR	R	S	0.95	59.8	46.8	0	2	0	0	2	1099.47	32	40	TRUE
Scaffold rerun with new version	Uncategorized Sample	300mM no BAF	S_300mM_no_BAF.RAW (F001830)	histone cluster 1, H2ae [Homo sapiens], gi|19557656|ref|NP_003504.2| histone cluster 1, H2ab [Homo sapiens], gi|30061357|ref|NP_835495.1| histone cluster 1, H2ad [Mus musculus], gi|30061361|ref|NP_835493.1| histone cluster 1, H2ag [Mus musculus], gi|30061363|ref|NP_835496.1| histone cluster 1, H2ac [Mus musculus], gi|30061365|ref|NP_835491.1| histone cluster 1, H2an [Mus musculus], gi|30061367|re…	gi|10645195,gi|10800130,gi|10800144,gi|109069903,gi|109070062,gi|109070072,gi|109095827,gi|109157563,gi|109505979,gi|109505989,gi|12025520,gi|149431856,gi|15617199,gi|157821615,gi|18105045,gi|224567,gi|24638446,gi|28316756,gi|29244126,gi|29553970,gi|30061327,gi|30061371,gi|30061379,gi|32111,gi|387182,gi|4504239,gi|4504245,gi|4504251,gi|51304,gi|57096146,gi|57106965,gi|57110393,gi|57110409,gi|5711…		0	0.908	1	2	3	0.00021	0	AGLQFPVGR	-	-	0.95	79.2	47.4	2	2	0	0	2	944.532	1	0	FALSE	gi|6912616,gi|109066680,gi|62087582,gi|74195793,gi|4504255,gi|56238118,gi|109500010
Scaffold rerun with new version	Uncategorized Sample	300mM no BAF	S_300mM_no_BAF.RAW (F001830)	histone cluster 1, H2ae [Homo sapiens], gi|19557656|ref|NP_003504.2| histone cluster 1, H2ab [Homo sapiens], gi|30061357|ref|NP_835495.1| histone cluster 1, H2ad [Mus musculus], gi|30061361|ref|NP_835493.1| histone cluster 1, H2ag [Mus musculus], gi|30061363|ref|NP_835496.1| histone cluster 1, H2ac [Mus musculus], gi|30061365|ref|NP_835491.1| histone cluster 1, H2an [Mus musculus], gi|30061367|re…	gi|10645195,gi|10800130,gi|10800144,gi|109069903,gi|109070062,gi|109070072,gi|109095827,gi|109157563,gi|109505979,gi|109505989,gi|12025520,gi|149431856,gi|15617199,gi|157821615,gi|18105045,gi|224567,gi|24638446,gi|28316756,gi|29244126,gi|29553970,gi|30061327,gi|30061371,gi|30061379,gi|32111,gi|387182,gi|4504239,gi|4504245,gi|4504251,gi|51304,gi|57096146,gi|57106965,gi|57110393,gi|57110409,gi|5711…		0	0.908	1	2	3	0.00021	0	HLQLAIR	-	-	0.842	38	47.1	0	9	0	0	2	850.526	1	0	FALSE	gi|6912616,gi|109066680,gi|62087582,gi|74195793,gi|4504255,gi|56238118,gi|74207672,gi|109500010
Scaffold rerun with new version	Uncategorized Sample	300mM no BAF	S_300mM_no_BAF.RAW (F001830)	histone cluster 1, H2ae [Homo sapiens], gi|19557656|ref|NP_003504.2| histone cluster 1, H2ab [Homo sapiens], gi|30061357|ref|NP_835495.1| histone cluster 1, H2ad [Mus musculus], gi|30061361|ref|NP_835493.1| histone cluster 1, H2ag [Mus musculus], gi|30061363|ref|NP_835496.1| histone cluster 1, H2ac [Mus musculus], gi|30061365|ref|NP_835491.1| histone cluster 1, H2an [Mus musculus], gi|30061367|re…	gi|10645195,gi|10800130,gi|10800144,gi|109069903,gi|109070062,gi|109070072,gi|109095827,gi|109157563,gi|109505979,gi|109505989,gi|12025520,gi|149431856,gi|15617199,gi|157821615,gi|18105045,gi|224567,gi|24638446,gi|28316756,gi|29244126,gi|29553970,gi|30061327,gi|30061371,gi|30061379,gi|32111,gi|387182,gi|4504239,gi|4504245,gi|4504251,gi|51304,gi|57096146,gi|57106965,gi|57110393,gi|57110409,gi|5711…		0	0.908	1	2	3	0.00021	0	VTIAQGGVLPNIQAVLLPK	-	-	0.95	74.5	45.8	0	2	1	0	2	1931.17	1	0	TRUE
Scaffold rerun with new version	Uncategorized Sample	300mM no BAF	S_300mM_no_BAF.RAW (F001830)	Ribosomal protein L14 [Homo sapiens].	gi|12653649		23485.3	0.908	1	1	1	7e-05	0.0556	LVAIVDVIDQNR	K	A	0.95	55.2	46.6	0	1	0	0	2	1354.77	24	35	TRUE
Scaffold rerun with new version	Uncategorized Sample	300mM no BAF	S_300mM_no_BAF.RAW (F001830)	PREDICTED: THO complex 4 [Macaca mulatta]	gi|109119121,gi|109492372,gi|109492374,gi|26339222,gi|34810642,gi|48474967,gi|55770864,gi|6755763,gi|68534069,gi|7159943,gi|73964741,gi|78369418		23828.4	0.908	1	1	2	0.00014	0.0505	SLGTADVHFER	R	R	0.95	75.4	47	0	2	0	0	2	1231.61	114	124	TRUE
Scaffold rerun with new version	Uncategorized Sample	300mM no BAF	S_300mM_no_BAF.RAW (F001830)	PREDICTED: similar to 40S ribosomal protein S25 [Rattus	gi|109483864		15890.4	0.908	1	1	2	0.00014	0.0694	LITPAVVSER	K	L	0.95	49.1	47	0	2	0	0	2	1084.64	86	95	TRUE
Scaffold rerun with new version	Uncategorized Sample	300mM no BAF	S_300mM_no_BAF.RAW (F001830)	SRp55-3.	gi|1049086,gi|1049088,gi|20127499,gi|62087532,gi|73992466,gi|78369222		39570.4	1	3	3	5	0.00035	0.0872	DADDAVYELNGK	R	E	0.95	43.7	46.6	0	1	0	0	2	1309.59	47	58	TRUE
Scaffold rerun with new version	Uncategorized Sample	300mM no BAF	S_300mM_no_BAF.RAW (F001830)	SRp55-3.	gi|1049086,gi|1049088,gi|20127499,gi|62087532,gi|73992466,gi|78369222		39570.4	1	3	3	5	0.00035	0.0872	LIVENLSSR	R	C	0.95	48.5	47.4	0	2	0	0	2	1030.59	112	120	TRUE
Scaffold rerun with new version	Uncategorized Sample	300mM no BAF	S_300mM_no_BAF.RAW (F001830)	SRp55-3.	gi|1049086,gi|1049088,gi|20127499,gi|62087532,gi|73992466,gi|78369222		39570.4	1	3	3	5	0.00035	0.0872	TNEGVIEFR	R	S	0.95	46.5	46.9	0	2	0	0	2	1064.54	146	154	TRUE
Scaffold rerun with new version	Uncategorized Sample	300mM no BAF	S_300mM_no_BAF.RAW (F001830)	PREDICTED: similar to small nuclear ribonucleoparticle-associated	gi|109080354,gi|109080392,gi|109092660,gi|109505083,gi|112307,gi|119331232,gi|12643865,gi|134545,gi|190247,gi|206694,gi|207008,gi|3142634,gi|337459,gi|337461,gi|36495,gi|38150007,gi|4507125,gi|4507135,gi|53690154,gi|57045593,gi|5870129,gi|5870130,gi|62896825,gi|6678053,gi|6730226,gi|73950978,gi|75057373,gi|77020260,gi|77736407,gi|86438323		24596.4	0.908	1	1	1	7e-05	0.0625	GENLVSMTVEGPPPK	R	D	0.95	51.2	46.2	0	1	0	0	2	1554.78	74	88	TRUE
Scaffold rerun with new version	Uncategorized Sample	300mM no BAF	S_300mM_no_BAF.RAW (F001830)	PREDICTED: similar to 60S ribosomal protein L23a [Macaca mulatta].	gi|109076051,gi|109113784,gi|109120362,gi|109148510,gi|109464365,gi|109500504,gi|16741485,gi|17105394,gi|20071865,gi|306549,gi|404015,gi|73950692,gi|76625673,gi|76634831		17535.2	0.99	2	2	4	0.00028	0.122	LDHYAIIK	K	F	0.799	37	47.3	0	1	0	0	2	972.552	71	78	TRUE
Scaffold rerun with new version	Uncategorized Sample	300mM no BAF	S_300mM_no_BAF.RAW (F001830)	PREDICTED: similar to 60S ribosomal protein L23a [Macaca mulatta].	gi|109076051,gi|109113784,gi|109120362,gi|109148510,gi|109464365,gi|109500504,gi|16741485,gi|17105394,gi|20071865,gi|306549,gi|404015,gi|73950692,gi|76625673,gi|76634831		17535.2	0.99	2	2	4	0.00028	0.122	VNTLIRPDGEK	K	K	0.95	44.4	46.6	0	3	0	0	2	1241.69	124	134	TRUE
Scaffold rerun with new version	Uncategorized Sample	300mM no BAF	S_300mM_no_BAF.RAW (F001830)	unnamed protein product [Homo sapiens].	gi|21754583,gi|4557701		48088.7	0.998	2	2	3	0.00021	0.118	ASLEGNLAETENR	K	Y	0.95	54.2	46.6	0	2	0	0	2	1403.68	322	334	TRUE
Scaffold rerun with new version	Uncategorized Sample	300mM no BAF	S_300mM_no_BAF.RAW (F001830)	unnamed protein product [Homo sapiens].	gi|21754583,gi|4557701		48088.7	0.998	2	2	3	0.00021	0.118	CEMEQQNQEYK	R	I	0.874	38.4	46.3	0	1	0	0	2	1486.59	358	368	FALSE	gi|15431310,gi|386848,gi|12803709
Scaffold rerun with new version	Uncategorized Sample	300mM no BAF	S_300mM_no_BAF.RAW (F001830)	unnamed protein product [Homo sapiens].	gi|21754583,gi|4557701		48088.7	0.998	2	2	3	0.00021	0.118	LASYLDK	R	V	0.858	34.4	46.8	1	1	0	0	2	809.441	95	101	FALSE	gi|55956899,gi|81175178,gi|24430192,gi|15431310,gi|1195531,gi|386848,gi|28317,gi|21961605,gi|12803709
Scaffold rerun with new version	Uncategorized Sample	300mM no BAF	S_300mM_no_BAF.RAW (F001830)	unnamed protein product [Homo sapiens].	gi|21754583,gi|4557701		48088.7	0.998	2	2	3	0.00021	0.118	LEQEIATYR	R	R	0.91	40.6	46.8	0	1	0	0	2	1122.58	377	385	FALSE	gi|24430192,gi|15431310,gi|1195531,gi|386848,gi|12803709
Scaffold rerun with new version	Uncategorized Sample	300mM no BAF	S_300mM_no_BAF.RAW (F001830)	unnamed protein product [Homo sapiens].	gi|21754583,gi|4557701		48088.7	0.998	2	2	3	0.00021	0.118	LSGGLGAGSCR	R	L	0.95	49.5	47.1	0	1	0	0	2	1034.51	31	41	TRUE
Scaffold rerun with new version	Uncategorized Sample	300mM no BAF	S_300mM_no_BAF.RAW (F001830)	PREDICTED: similar to 40S ribosomal protein S6 isoform 1 [Macaca	gi|109111441,gi|109124488,gi|15342049,gi|20381196,gi|225901,gi|26389925,gi|337514,gi|337516,gi|34785048,gi|57101416,gi|62752040,gi|6677809,gi|74177679,gi|82885362,gi|82955311		28663.7	0.995	2	2	2	0.00014	0.0803	DIPGLTDTTVPR	K	R	0.95	45.8	46.5	0	1	0	0	2	1284.68	120	131	TRUE
Scaffold rerun with new version	Uncategorized Sample	300mM no BAF	S_300mM_no_BAF.RAW (F001830)	PREDICTED: similar to 40S ribosomal protein S6 isoform 1 [Macaca	gi|109111441,gi|109124488,gi|15342049,gi|20381196,gi|225901,gi|26389925,gi|337514,gi|337516,gi|34785048,gi|57101416,gi|62752040,gi|6677809,gi|74177679,gi|82885362,gi|82955311		28663.7	0.995	2	2	2	0.00014	0.0803	LIEVDDER	K	K	0.898	40.6	47.5	0	1	0	0	2	988.495	15	22	TRUE
Scaffold rerun with new version	Uncategorized Sample	300mM no BAF	S_300mM_no_BAF.RAW (F001830)	ribosomal protein S5 [Homo sapiens], gi|62751703|ref|NP_001015531.1| ribosomal protein S5 [Bos taurus], gi|57036143|ref|XP_533568.1| PREDICTED: similar to ribosomal protein S5 isoform 1 [Canis familiaris], gi|73946777|ref|XP_861863.1| PREDICTED: similar to ribosomal protein S5 isoform 5 [Canis familiaris], gi|109126282|ref|XP_001096993.1| PREDICTED: similar to ribosomal protein S5 isoform 1 [Maca…	gi|13904870,gi|3088336,gi|3717978,gi|550021,gi|55824584,gi|62897773,gi|73946771,gi|73946773		22759.8	0.908	1	1	1	7e-05	0.0735	TIAECLADELINAAK	K	G	0.95	51.7	46.3	0	1	0	0	2	1631.83	168	182	TRUE
Scaffold rerun with new version	Uncategorized Sample	300mM no BAF	S_300mM_no_BAF.RAW (F001830)	keratin 1 [Homo sapiens].	gi|11935049		66050.3	1	17	17	34	0.00238	0.3	AEAESLYQSK	K	Y	0.95	61.7	46.7	0	2	0	0	2	1125.54	367	376	TRUE	gi|109096823,gi|109096825,gi|109096827,gi|109096829
Scaffold rerun with new version	Uncategorized Sample	300mM no BAF	S_300mM_no_BAF.RAW (F001830)	keratin 1 [Homo sapiens].	gi|11935049		66050.3	1	17	17	34	0.00238	0.3	AQYEDIAQK	K	S	0.936	42.5	47.1	0	2	0	0	2	1065.52	356	364	TRUE
Scaffold rerun with new version	Uncategorized Sample	300mM no BAF	S_300mM_no_BAF.RAW (F001830)	keratin 1 [Homo sapiens].	gi|11935049		66050.3	1	17	17	34	0.00238	0.3	DVDGAYMTK	K	V	0.873	39	46.9	0	3	0	0	2	999.446	290	298	TRUE
Scaffold rerun with new version	Uncategorized Sample	300mM no BAF	S_300mM_no_BAF.RAW (F001830)	keratin 1 [Homo sapiens].	gi|11935049		66050.3	1	17	17	34	0.00238	0.3	DYQELMNTK	R	L	0.95	47.8	46.9	0	2	0	0	2	1141.52	464	472	TRUE	gi|109096823,gi|109096825,gi|81891716,gi|109096827,gi|109096829
Scaffold rerun with new version	Uncategorized Sample	300mM no BAF	S_300mM_no_BAF.RAW (F001830)	keratin 1 [Homo sapiens].	gi|11935049		66050.3	1	17	17	34	0.00238	0.3	FSSCGGGGGSFGAGGGFGSR	R	S	0.909	40	46.3	0	1	0	0	2	1765.74	46	65	TRUE
Scaffold rerun with new version	Uncategorized Sample	300mM no BAF	S_300mM_no_BAF.RAW (F001830)	keratin 1 [Homo sapiens].	gi|11935049		66050.3	1	17	17	34	0.00238	0.3	IEISELNR	K	V	0.95	52.7	47.6	0	2	0	0	2	973.532	396	403	TRUE	gi|109096823,gi|109096825,gi|47132620,gi|547754,gi|109096827,gi|109096829
Scaffold rerun with new version	Uncategorized Sample	300mM no BAF	S_300mM_no_BAF.RAW (F001830)	keratin 1 [Homo sapiens].	gi|11935049		66050.3	1	17	17	34	0.00238	0.3	LNDLEDALQQAK	K	E	0.95	85	46.6	0	4	0	0	2	1357.7	444	455	TRUE	gi|109096823,gi|109096825,gi|109096827,gi|109096829
Scaffold rerun with new version	Uncategorized Sample	300mM no BAF	S_300mM_no_BAF.RAW (F001830)	keratin 1 [Homo sapiens].	gi|11935049		66050.3	1	17	17	34	0.00238	0.3	MSGECAPNVSVSVSTSHTTISGGGSR	R	G	0.95	43.2	44.5	0	0	2	0	2	2565.17	493	518	TRUE
Scaffold rerun with new version	Uncategorized Sample	300mM no BAF	S_300mM_no_BAF.RAW (F001830)	keratin 1 [Homo sapiens].	gi|11935049		66050.3	1	17	17	34	0.00238	0.3	NMQDMVEDYR	K	N	0.905	40.1	46.6	0	2	0	0	2	1300.53	258	267	TRUE	gi|109096823,gi|109096825,gi|109096827,gi|109096829
Scaffold rerun with new version	Uncategorized Sample	300mM no BAF	S_300mM_no_BAF.RAW (F001830)	keratin 1 [Homo sapiens].	gi|11935049		66050.3	1	17	17	34	0.00238	0.3	QISNLQQSISDAEQR	K	G	0.95	85.4	46	0	2	0	0	2	1716.85	418	432	TRUE
Scaffold rerun with new version	Uncategorized Sample	300mM no BAF	S_300mM_no_BAF.RAW (F001830)	keratin 1 [Homo sapiens].	gi|11935049		66050.3	1	17	17	34	0.00238	0.3	SKAEAESLYQSK	K	Y	0.95	53.6	46.6	0	2	0	0	2	1340.67	365	376	TRUE	gi|109096823,gi|109096825,gi|109096827,gi|109096829
Scaffold rerun with new version	Uncategorized Sample	300mM no BAF	S_300mM_no_BAF.RAW (F001830)	keratin 1 [Homo sapiens].	gi|11935049		66050.3	1	17	17	34	0.00238	0.3	SLDLDSIIAEVK	R	A	0.95	107	46.9	0	2	0	0	2	1302.72	344	355	TRUE	gi|109096823,gi|109096825,gi|109096827,gi|109096829
Scaffold rerun with new version	Uncategorized Sample	300mM no BAF	S_300mM_no_BAF.RAW (F001830)	keratin 1 [Homo sapiens].	gi|11935049		66050.3	1	17	17	34	0.00238	0.3	SLNNQFASFIDK	K	V	0.95	89.1	46.4	0	3	0	0	2	1383.69	186	197	TRUE	gi|109096823,gi|109096825,gi|109096827,gi|109096829
Scaffold rerun with new version	Uncategorized Sample	300mM no BAF	S_300mM_no_BAF.RAW (F001830)	keratin 1 [Homo sapiens].	gi|11935049		66050.3	1	17	17	34	0.00238	0.3	SLVNLGGSK	R	S	0.655	29.5	47.9	1	0	0	0	2	874.5	66	74	TRUE	gi|109096823,gi|109096825,gi|109096827,gi|109096829
Scaffold rerun with new version	Uncategorized Sample	300mM no BAF	S_300mM_no_BAF.RAW (F001830)	keratin 1 [Homo sapiens].	gi|11935049		66050.3	1	17	17	34	0.00238	0.3	TLLEGEESR	R	M	0.891	39.9	47.1	0	1	0	0	2	1033.52	484	492	TRUE	gi|109096823,gi|109096825,gi|109096827,gi|109096829
Scaffold rerun with new version	Uncategorized Sample	300mM no BAF	S_300mM_no_BAF.RAW (F001830)	keratin 1 [Homo sapiens].	gi|11935049		66050.3	1	17	17	34	0.00238	0.3	TNAENEFVTIK	R	K	0.95	77.8	46.7	0	2	0	0	2	1265.64	278	288	TRUE	gi|109096823,gi|109096825,gi|81891716,gi|109096827,gi|109096829
Scaffold rerun with new version	Uncategorized Sample	300mM no BAF	S_300mM_no_BAF.RAW (F001830)	keratin 1 [Homo sapiens].	gi|11935049		66050.3	1	17	17	34	0.00238	0.3	YEELQITAGR	K	H	0.95	48.3	46.9	0	1	0	0	2	1179.6	377	386	TRUE	gi|109096781,gi|109096823,gi|109096825,gi|109096827,gi|109096829
Scaffold rerun with new version	Uncategorized Sample	300mM no BAF	S_300mM_no_BAF.RAW (F001830)	ribosomal protein S14 [Rattus norvegicus].	gi|12083607,gi|3097244,gi|5032051,gi|5441523,gi|63680339,gi|74226871,gi|82958328		16254.9	0.984	2	2	3	0.00021	0.159	IEDVTPIPSDSTR	R	R	0.676	33.2	46.3	0	1	0	0	2	1429.72	129	141	TRUE
Scaffold rerun with new version	Uncategorized Sample	300mM no BAF	S_300mM_no_BAF.RAW (F001830)	ribosomal protein S14 [Rattus norvegicus].	gi|12083607,gi|3097244,gi|5032051,gi|5441523,gi|63680339,gi|74226871,gi|82958328		16254.9	0.984	2	2	3	0.00021	0.159	TPGPGAQSALR	K	A	0.95	48.2	46.7	0	2	0	0	2	1054.56	107	117	TRUE
Scaffold rerun with new version	Uncategorized Sample	300mM no BAF	S_300mM_no_BAF.RAW (F001830)	lamin B1 [Homo sapiens], gi|125953|sp|P20700|LMNB1_HUMAN Lamin-B1, gi|307106|gb|AAA36162.1| lamin B, gi|576840|gb|AAC37575.1| lamin B1 [Homo sapiens], gi|74354337|gb|AAI03724.1| Lamin B1 [Homo sapiens], gi|119569231|gb|EAW48846.1| lamin B1, isoform CRA_b [Homo sapiens], gi|189069155|dbj|BAG35493.1| unnamed protein product [Homo sapiens] [MASS=66408]	gi|5031877		66391.6	0.908	1	1	1	7e-05	0.0392	KLLEGEEER	R	L	0.95	50.8	47.3	0	3	0	0	2	1102.57	379	387	FALSE	gi|27436946,gi|57014043,gi|73987493,gi|74220835,gi|27436951
Scaffold rerun with new version	Uncategorized Sample	300mM no BAF	S_300mM_no_BAF.RAW (F001830)	lamin B1 [Homo sapiens], gi|125953|sp|P20700|LMNB1_HUMAN Lamin-B1, gi|307106|gb|AAA36162.1| lamin B, gi|576840|gb|AAC37575.1| lamin B1 [Homo sapiens], gi|74354337|gb|AAI03724.1| Lamin B1 [Homo sapiens], gi|119569231|gb|EAW48846.1| lamin B1, isoform CRA_b [Homo sapiens], gi|189069155|dbj|BAG35493.1| unnamed protein product [Homo sapiens] [MASS=66408]	gi|5031877		66391.6	0.908	1	1	1	7e-05	0.0392	LLEGEEER	K	L	0.95	47.1	47.4	0	2	0	0	2	974.48	380	387	FALSE	gi|27436946,gi|57014043,gi|73987493,gi|74220835,gi|27436951
Scaffold rerun with new version	Uncategorized Sample	300mM no BAF	S_300mM_no_BAF.RAW (F001830)	lamin B1 [Homo sapiens], gi|125953|sp|P20700|LMNB1_HUMAN Lamin-B1, gi|307106|gb|AAA36162.1| lamin B, gi|576840|gb|AAC37575.1| lamin B1 [Homo sapiens], gi|74354337|gb|AAI03724.1| Lamin B1 [Homo sapiens], gi|119569231|gb|EAW48846.1| lamin B1, isoform CRA_b [Homo sapiens], gi|189069155|dbj|BAG35493.1| unnamed protein product [Homo sapiens] [MASS=66408]	gi|5031877		66391.6	0.908	1	1	1	7e-05	0.0392	LSSEMNTSTVNSAR	R	E	0.95	71	46.3	0	1	0	0	2	1496.7	277	290	TRUE
Scaffold rerun with new version	Uncategorized Sample	300mM no BAF	S_300mM_no_BAF.RAW (F001830)	PREDICTED: similar to heterogeneous nuclear ribonucleoprotein A3	gi|109100194,gi|109100196,gi|109100198,gi|157277969,gi|197098694,gi|31559916,gi|34740329,gi|38328278,gi|51769129,gi|55250278,gi|62027493,gi|73959030,gi|73959032,gi|74004682,gi|74004690,gi|74004692,gi|74004694,gi|74004696,gi|74004700,gi|74004702,gi|74004704,gi|74004706,gi|74228812,gi|82801284,gi|82918359,gi|82918363,gi|82956957,gi|82957137,gi|94371439,gi|94400765		39634.2	0.999	3	3	6	0.00042	0.103	DYFEKYGK	R	I	0.783	36.5	47.2	0	2	0	0	2	1049.49	144	151	TRUE	gi|14043070,gi|74204146,gi|149714872,gi|109098438,gi|74220381,gi|73993824,gi|73993822,gi|8393547,gi|85060507,gi|109131409,gi|75517570,gi|38328245,gi|133254,gi|112421201,gi|13436308,gi|4504445,gi|73996141
Scaffold rerun with new version	Uncategorized Sample	300mM no BAF	S_300mM_no_BAF.RAW (F001830)	PREDICTED: similar to heterogeneous nuclear ribonucleoprotein A3	gi|109100194,gi|109100196,gi|109100198,gi|157277969,gi|197098694,gi|31559916,gi|34740329,gi|38328278,gi|51769129,gi|55250278,gi|62027493,gi|73959030,gi|73959032,gi|74004682,gi|74004690,gi|74004692,gi|74004694,gi|74004696,gi|74004700,gi|74004702,gi|74004704,gi|74004706,gi|74228812,gi|82801284,gi|82918359,gi|82918363,gi|82956957,gi|82957137,gi|94371439,gi|94400765		39634.2	0.999	3	3	6	0.00042	0.103	EDTEEYNLR	K	D	0.95	62.8	46.6	0	2	0	0	2	1168.51	135	143	TRUE
Scaffold rerun with new version	Uncategorized Sample	300mM no BAF	S_300mM_no_BAF.RAW (F001830)	PREDICTED: similar to heterogeneous nuclear ribonucleoprotein A3	gi|109100194,gi|109100196,gi|109100198,gi|157277969,gi|197098694,gi|31559916,gi|34740329,gi|38328278,gi|51769129,gi|55250278,gi|62027493,gi|73959030,gi|73959032,gi|74004682,gi|74004690,gi|74004692,gi|74004694,gi|74004696,gi|74004700,gi|74004702,gi|74004704,gi|74004706,gi|74228812,gi|82801284,gi|82918359,gi|82918363,gi|82956957,gi|82957137,gi|94371439,gi|94400765		39634.2	0.999	3	3	6	0.00042	0.103	SSGSPYGGGYGSGGGSGGYGSR	R	R	0.95	118	45.6	0	2	0	0	2	1910.79	356	377	TRUE
Scaffold rerun with new version	Uncategorized Sample	300mM no BAF	S_300mM_no_BAF.RAW (F001830)	RecName: Full=Eukaryotic translation initiation factor 6;	gi|118593822,gi|13785574,gi|41386715,gi|4504771,gi|57104176,gi|73991736		26580.2	0.997	2	2	4	0.00028	0.131	ASFENNCEIGCFAK	R	L	0.95	59.2	46.3	0	3	0	0	2	1646.69	5	18	TRUE
Scaffold rerun with new version	Uncategorized Sample	300mM no BAF	S_300mM_no_BAF.RAW (F001830)	RecName: Full=Eukaryotic translation initiation factor 6;	gi|118593822,gi|13785574,gi|41386715,gi|4504771,gi|57104176,gi|73991736		26580.2	0.997	2	2	4	0.00028	0.131	HGLLVPNNTTDQELQHIR	R	N	0.937	40	45.2	0	0	1	0	2	2085.08	68	85	TRUE
Scaffold rerun with new version	Uncategorized Sample	300mM no BAF	S_300mM_no_BAF.RAW (F001830)	PREDICTED: similar to ribosomal protein S19 isoform 2 [Macaca	gi|109124932,gi|109483232,gi|12963511,gi|16924231,gi|2500494,gi|38083674,gi|4506695,gi|50981396,gi|56541224,gi|61815543,gi|73948285,gi|82886943,gi|94397093		16410	0.991	2	2	2	0.00014	0.069	RVLQALEGLK	R	M	0.858	38.2	46.7	0	1	0	0	2	1126.69	102	111	TRUE
Scaffold rerun with new version	Uncategorized Sample	300mM no BAF	S_300mM_no_BAF.RAW (F001830)	PREDICTED: similar to ribosomal protein S19 isoform 2 [Macaca	gi|109124932,gi|109483232,gi|12963511,gi|16924231,gi|2500494,gi|38083674,gi|4506695,gi|50981396,gi|56541224,gi|61815543,gi|73948285,gi|82886943,gi|94397093		16410	0.991	2	2	2	0.00014	0.069	VLQALEGLK	R	M	0.939	42.6	46.9	0	1	0	0	2	970.594	103	111	TRUE
Scaffold rerun with new version	Uncategorized Sample	300mM no BAF	S_300mM_no_BAF.RAW (F001830)	PREDICTED: similar to ribosomal protein S18 isoform 1 [Macaca	gi|109073771,gi|149263957,gi|28189422,gi|28189549,gi|6755368,gi|74197062		15380.7	1	3	3	6	0.00042	0.244	AGELTEDEVER	R	V	0.95	65	46.8	0	3	0	0	2	1247.58	56	66	TRUE
Scaffold rerun with new version	Uncategorized Sample	300mM no BAF	S_300mM_no_BAF.RAW (F001830)	PREDICTED: similar to ribosomal protein S18 isoform 1 [Macaca	gi|109073771,gi|149263957,gi|28189422,gi|28189549,gi|6755368,gi|74197062		15380.7	1	3	3	6	0.00042	0.244	VLNTNIDGR	R	R	0.95	45	47.5	0	1	0	0	2	1001.54	15	23	TRUE
Scaffold rerun with new version	Uncategorized Sample	300mM no BAF	S_300mM_no_BAF.RAW (F001830)	PREDICTED: similar to ribosomal protein S18 isoform 1 [Macaca	gi|109073771,gi|149263957,gi|28189422,gi|28189549,gi|6755368,gi|74197062		15380.7	1	3	3	6	0.00042	0.244	YSQVLANGLDNK	K	L	0.95	46.3	46.7	0	2	0	0	2	1321.68	95	106	TRUE
Scaffold rerun with new version	Uncategorized Sample	300mM no BAF	S_300mM_no_BAF.RAW (F001830)	PREDICTED: similar to ribosomal protein L4 isoform 2 [Macaca mulatta]	gi|109081576,gi|75076107		47690.9	0.908	1	1	2	0.00014	0.0468	AAAAAAALEAK	K	S	0.95	48.2	47.2	0	2	0	0	2	957.537	354	364	TRUE
Scaffold rerun with new version	Uncategorized Sample	300mM no BAF	S_300mM_no_BAF.RAW (F001830)	PREDICTED: similar to ribosomal protein L4 isoform 2 [Macaca mulatta]	gi|109081576,gi|75076107		47690.9	0.908	1	1	2	0.00014	0.0468	LDELYGTWR	K	K	0.95	51.3	46.8	0	1	0	0	2	1152.57	260	268	FALSE	gi|62087534,gi|197097764,gi|16579885
Scaffold rerun with new version	Uncategorized Sample	300mM no BAF	S_300mM_no_BAF.RAW (F001830)	PREDICTED: similar to ribosomal protein S8 [Macaca mulatta].	gi|109075664,gi|13542987,gi|26353710,gi|27689323,gi|28491531,gi|4506743,gi|73977177,gi|73977179,gi|73977181,gi|73977183,gi|73977185,gi|82922494,gi|94387984		24188.4	0.998	2	2	4	0.00028	0.106	ADGYVLEGK	R	E	0.95	60.7	47	0	2	0	0	2	951.479	185	193	TRUE
Scaffold rerun with new version	Uncategorized Sample	300mM no BAF	S_300mM_no_BAF.RAW (F001830)	PREDICTED: similar to ribosomal protein S8 [Macaca mulatta].	gi|109075664,gi|13542987,gi|26353710,gi|27689323,gi|28491531,gi|4506743,gi|73977177,gi|73977179,gi|73977181,gi|73977183,gi|73977185,gi|82922494,gi|94387984		24188.4	0.998	2	2	4	0.00028	0.106	ISSLLEEQFQQGK	K	L	0.95	76.7	46.3	0	2	0	0	2	1506.78	158	170	TRUE
Scaffold rerun with new version	Uncategorized Sample	300mM no BAF	S_300mM_no_BAF.RAW (F001830)	PREDICTED: similar to splicing factor, arginine/serine-rich 7 [Macaca mulatta]	gi|109102749,gi|15928796,gi|20071765,gi|21749793,gi|22122585,gi|26328639,gi|26350021,gi|71162370,gi|72534660,gi|73980752,gi|77735509,gi|84781668		37354.1	0.908	1	1	3	0.00021	0.0365	VYVGNLGTGAGK	K	G	0.95	72.4	47.6	0	3	0	0	2	1135.61	104	115	TRUE
Scaffold rerun with new version	Uncategorized Sample	300mM no BAF	S_300mM_no_BAF.RAW (F001830)	spectrin, alpha, non-erythrocytic 1 (alpha-fodrin) isoform 2 [Homo sapiens], gi|94730425|sp|Q13813|SPTA2_HUMAN Spectrin alpha chain, brain (Spectrin, non-erythroid alpha chain) (Alpha-II spectrin) (Fodrin alpha chain), gi|55663122|emb|CAH71405.1| spectrin, alpha, non-erythrocytic 1 (alpha-fodrin) [Homo sapiens] [MASS=284537]	gi|154759259,gi|17380501,gi|1805280,gi|194595509,gi|31543764,gi|31565122,gi|47477769,gi|62089306		0	1	6	6	9	0.00063	0	ASAFNSWFENAEEDLTDPVR	-	-	0.878	37.2	44.9	0	1	0	0	2	2298.03	1	0	TRUE
Scaffold rerun with new version	Uncategorized Sample	300mM no BAF	S_300mM_no_BAF.RAW (F001830)	spectrin, alpha, non-erythrocytic 1 (alpha-fodrin) isoform 2 [Homo sapiens], gi|94730425|sp|Q13813|SPTA2_HUMAN Spectrin alpha chain, brain (Spectrin, non-erythroid alpha chain) (Alpha-II spectrin) (Fodrin alpha chain), gi|55663122|emb|CAH71405.1| spectrin, alpha, non-erythrocytic 1 (alpha-fodrin) [Homo sapiens] [MASS=284537]	gi|154759259,gi|17380501,gi|1805280,gi|194595509,gi|31543764,gi|31565122,gi|47477769,gi|62089306		0	1	6	6	9	0.00063	0	DCEQAENWMAAR	-	-	0.95	58.1	46.2	0	1	0	0	2	1480.59	1	0	TRUE
Scaffold rerun with new version	Uncategorized Sample	300mM no BAF	S_300mM_no_BAF.RAW (F001830)	spectrin, alpha, non-erythrocytic 1 (alpha-fodrin) isoform 2 [Homo sapiens], gi|94730425|sp|Q13813|SPTA2_HUMAN Spectrin alpha chain, brain (Spectrin, non-erythroid alpha chain) (Alpha-II spectrin) (Fodrin alpha chain), gi|55663122|emb|CAH71405.1| spectrin, alpha, non-erythrocytic 1 (alpha-fodrin) [Homo sapiens] [MASS=284537]	gi|154759259,gi|17380501,gi|1805280,gi|194595509,gi|31543764,gi|31565122,gi|47477769,gi|62089306		0	1	6	6	9	0.00063	0	IDGITIQAR	-	-	0.95	58.4	47.4	0	2	0	0	2	986.564	1	0	TRUE
Scaffold rerun with new version	Uncategorized Sample	300mM no BAF	S_300mM_no_BAF.RAW (F001830)	spectrin, alpha, non-erythrocytic 1 (alpha-fodrin) isoform 2 [Homo sapiens], gi|94730425|sp|Q13813|SPTA2_HUMAN Spectrin alpha chain, brain (Spectrin, non-erythroid alpha chain) (Alpha-II spectrin) (Fodrin alpha chain), gi|55663122|emb|CAH71405.1| spectrin, alpha, non-erythrocytic 1 (alpha-fodrin) [Homo sapiens] [MASS=284537]	gi|154759259,gi|17380501,gi|1805280,gi|194595509,gi|31543764,gi|31565122,gi|47477769,gi|62089306		0	1	6	6	9	0.00063	0	SSEEIESAFR	-	-	0.95	72	46.7	0	2	0	0	2	1154.53	1	0	TRUE
Scaffold rerun with new version	Uncategorized Sample	300mM no BAF	S_300mM_no_BAF.RAW (F001830)	spectrin, alpha, non-erythrocytic 1 (alpha-fodrin) isoform 2 [Homo sapiens], gi|94730425|sp|Q13813|SPTA2_HUMAN Spectrin alpha chain, brain (Spectrin, non-erythroid alpha chain) (Alpha-II spectrin) (Fodrin alpha chain), gi|55663122|emb|CAH71405.1| spectrin, alpha, non-erythrocytic 1 (alpha-fodrin) [Homo sapiens] [MASS=284537]	gi|154759259,gi|17380501,gi|1805280,gi|194595509,gi|31543764,gi|31565122,gi|47477769,gi|62089306		0	1	6	6	9	0.00063	0	VLETAEDIQER	-	-	0.95	77.7	46.9	0	2	0	0	2	1302.65	1	0	TRUE
Scaffold rerun with new version	Uncategorized Sample	300mM no BAF	S_300mM_no_BAF.RAW (F001830)	spectrin, alpha, non-erythrocytic 1 (alpha-fodrin) isoform 2 [Homo sapiens], gi|94730425|sp|Q13813|SPTA2_HUMAN Spectrin alpha chain, brain (Spectrin, non-erythroid alpha chain) (Alpha-II spectrin) (Fodrin alpha chain), gi|55663122|emb|CAH71405.1| spectrin, alpha, non-erythrocytic 1 (alpha-fodrin) [Homo sapiens] [MASS=284537]	gi|154759259,gi|17380501,gi|1805280,gi|194595509,gi|31543764,gi|31565122,gi|47477769,gi|62089306		0	1	6	6	9	0.00063	0	VNDVCTNGQDLIK	-	-	0.65	33.1	46.5	0	1	0	0	2	1475.72	1	0	TRUE
Scaffold rerun with new version	Uncategorized Sample	300mM no BAF	S_300mM_no_BAF.RAW (F001830)	myosin, heavy polypeptide 9, non-muscle [Homo sapiens], gi|6166599|sp|P35579.4|MYH9_HUMAN Myosin-9 (Myosin heavy chain 9) (Myosin heavy chain, non-muscle IIa) (Non-muscle myosin heavy chain IIa) (NMMHC II-a) (NMMHC-IIA) (Cellular myosin heavy chain, type A) (Non-muscle myosin heavy chain-A) (NMMHC-A), gi|3169000|emb|CAB05105.1| myosin, heavy chain 9, non-muscle [Homo sapiens], gi|47678583|emb|CAG…	gi|12667788		226520	1	15	15	26	0.00182	0.0949	ADFCIIHYAGK	K	V	0.58	31.9	46.5	0	2	0	0	2	1294.63	566	576	TRUE	gi|30268331
Scaffold rerun with new version	Uncategorized Sample	300mM no BAF	S_300mM_no_BAF.RAW (F001830)	myosin, heavy polypeptide 9, non-muscle [Homo sapiens], gi|6166599|sp|P35579.4|MYH9_HUMAN Myosin-9 (Myosin heavy chain 9) (Myosin heavy chain, non-muscle IIa) (Non-muscle myosin heavy chain IIa) (NMMHC II-a) (NMMHC-IIA) (Cellular myosin heavy chain, type A) (Non-muscle myosin heavy chain-A) (NMMHC-A), gi|3169000|emb|CAB05105.1| myosin, heavy chain 9, non-muscle [Homo sapiens], gi|47678583|emb|CAG…	gi|12667788		226520	1	15	15	26	0.00182	0.0949	ALEEAMEQK	R	A	0.95	61.7	47.2	0	2	0	0	2	1048.5	1484	1492	TRUE	gi|30268331
Scaffold rerun with new version	Uncategorized Sample	300mM no BAF	S_300mM_no_BAF.RAW (F001830)	myosin, heavy polypeptide 9, non-muscle [Homo sapiens], gi|6166599|sp|P35579.4|MYH9_HUMAN Myosin-9 (Myosin heavy chain 9) (Myosin heavy chain, non-muscle IIa) (Non-muscle myosin heavy chain IIa) (NMMHC II-a) (NMMHC-IIA) (Cellular myosin heavy chain, type A) (Non-muscle myosin heavy chain-A) (NMMHC-A), gi|3169000|emb|CAB05105.1| myosin, heavy chain 9, non-muscle [Homo sapiens], gi|47678583|emb|CAG…	gi|12667788		226520	1	15	15	26	0.00182	0.0949	ASITALEAK	K	I	0.95	53.7	47.7	0	2	0	0	2	903.515	1807	1815	TRUE	gi|30268331
Scaffold rerun with new version	Uncategorized Sample	300mM no BAF	S_300mM_no_BAF.RAW (F001830)	myosin, heavy polypeptide 9, non-muscle [Homo sapiens], gi|6166599|sp|P35579.4|MYH9_HUMAN Myosin-9 (Myosin heavy chain 9) (Myosin heavy chain, non-muscle IIa) (Non-muscle myosin heavy chain IIa) (NMMHC II-a) (NMMHC-IIA) (Cellular myosin heavy chain, type A) (Non-muscle myosin heavy chain-A) (NMMHC-A), gi|3169000|emb|CAB05105.1| myosin, heavy chain 9, non-muscle [Homo sapiens], gi|47678583|emb|CAG…	gi|12667788		226520	1	15	15	26	0.00182	0.0949	DELADEIANSSGK	R	G	0.95	59.9	47	0	2	0	0	2	1348.62	1704	1716	TRUE	gi|30268331
Scaffold rerun with new version	Uncategorized Sample	300mM no BAF	S_300mM_no_BAF.RAW (F001830)	myosin, heavy polypeptide 9, non-muscle [Homo sapiens], gi|6166599|sp|P35579.4|MYH9_HUMAN Myosin-9 (Myosin heavy chain 9) (Myosin heavy chain, non-muscle IIa) (Non-muscle myosin heavy chain IIa) (NMMHC II-a) (NMMHC-IIA) (Cellular myosin heavy chain, type A) (Non-muscle myosin heavy chain-A) (NMMHC-A), gi|3169000|emb|CAB05105.1| myosin, heavy chain 9, non-muscle [Homo sapiens], gi|47678583|emb|CAG…	gi|12667788		226520	1	15	15	26	0.00182	0.0949	DLEAHIDSANK	K	N	0.95	63.2	46.6	0	2	0	0	2	1212.59	1621	1631	TRUE	gi|30268331
Scaffold rerun with new version	Uncategorized Sample	300mM no BAF	S_300mM_no_BAF.RAW (F001830)	myosin, heavy polypeptide 9, non-muscle [Homo sapiens], gi|6166599|sp|P35579.4|MYH9_HUMAN Myosin-9 (Myosin heavy chain 9) (Myosin heavy chain, non-muscle IIa) (Non-muscle myosin heavy chain IIa) (NMMHC II-a) (NMMHC-IIA) (Cellular myosin heavy chain, type A) (Non-muscle myosin heavy chain-A) (NMMHC-A), gi|3169000|emb|CAB05105.1| myosin, heavy chain 9, non-muscle [Homo sapiens], gi|47678583|emb|CAG…	gi|12667788		226520	1	15	15	26	0.00182	0.0949	EDQSILCTGESGAGK	R	T	0.95	74.6	46.3	0	2	0	0	2	1551.7	166	180	TRUE	gi|30268331
Scaffold rerun with new version	Uncategorized Sample	300mM no BAF	S_300mM_no_BAF.RAW (F001830)	myosin, heavy polypeptide 9, non-muscle [Homo sapiens], gi|6166599|sp|P35579.4|MYH9_HUMAN Myosin-9 (Myosin heavy chain 9) (Myosin heavy chain, non-muscle IIa) (Non-muscle myosin heavy chain IIa) (NMMHC II-a) (NMMHC-IIA) (Cellular myosin heavy chain, type A) (Non-muscle myosin heavy chain-A) (NMMHC-A), gi|3169000|emb|CAB05105.1| myosin, heavy chain 9, non-muscle [Homo sapiens], gi|47678583|emb|CAG…	gi|12667788		226520	1	15	15	26	0.00182	0.0949	ELEDATETADAMNR	R	E	0.95	94.6	46.3	0	1	0	0	2	1565.68	1899	1912	TRUE
Scaffold rerun with new version	Uncategorized Sample	300mM no BAF	S_300mM_no_BAF.RAW (F001830)	myosin, heavy polypeptide 9, non-muscle [Homo sapiens], gi|6166599|sp|P35579.4|MYH9_HUMAN Myosin-9 (Myosin heavy chain 9) (Myosin heavy chain, non-muscle IIa) (Non-muscle myosin heavy chain IIa) (NMMHC II-a) (NMMHC-IIA) (Cellular myosin heavy chain, type A) (Non-muscle myosin heavy chain-A) (NMMHC-A), gi|3169000|emb|CAB05105.1| myosin, heavy chain 9, non-muscle [Homo sapiens], gi|47678583|emb|CAG…	gi|12667788		226520	1	15	15	26	0.00182	0.0949	IAQLEEQLDNETK	K	E	0.95	86.8	46.3	0	3	0	0	2	1530.77	1816	1828	TRUE	gi|30268331
Scaffold rerun with new version	Uncategorized Sample	300mM no BAF	S_300mM_no_BAF.RAW (F001830)	myosin, heavy polypeptide 9, non-muscle [Homo sapiens], gi|6166599|sp|P35579.4|MYH9_HUMAN Myosin-9 (Myosin heavy chain 9) (Myosin heavy chain, non-muscle IIa) (Non-muscle myosin heavy chain IIa) (NMMHC II-a) (NMMHC-IIA) (Cellular myosin heavy chain, type A) (Non-muscle myosin heavy chain-A) (NMMHC-A), gi|3169000|emb|CAB05105.1| myosin, heavy chain 9, non-muscle [Homo sapiens], gi|47678583|emb|CAG…	gi|12667788		226520	1	15	15	26	0.00182	0.0949	KFDQLLAEEK	K	T	0.95	49.8	46.9	0	2	0	0	2	1220.65	1445	1454	TRUE	gi|30268331
Scaffold rerun with new version	Uncategorized Sample	300mM no BAF	S_300mM_no_BAF.RAW (F001830)	myosin, heavy polypeptide 9, non-muscle [Homo sapiens], gi|6166599|sp|P35579.4|MYH9_HUMAN Myosin-9 (Myosin heavy chain 9) (Myosin heavy chain, non-muscle IIa) (Non-muscle myosin heavy chain IIa) (NMMHC II-a) (NMMHC-IIA) (Cellular myosin heavy chain, type A) (Non-muscle myosin heavy chain-A) (NMMHC-A), gi|3169000|emb|CAB05105.1| myosin, heavy chain 9, non-muscle [Homo sapiens], gi|47678583|emb|CAG…	gi|12667788		226520	1	15	15	26	0.00182	0.0949	MEDSVGCLETAEEVK	K	R	0.887	38.7	46.1	0	1	0	0	2	1696.74	1373	1387	TRUE
Scaffold rerun with new version	Uncategorized Sample	300mM no BAF	S_300mM_no_BAF.RAW (F001830)	myosin, heavy polypeptide 9, non-muscle [Homo sapiens], gi|6166599|sp|P35579.4|MYH9_HUMAN Myosin-9 (Myosin heavy chain 9) (Myosin heavy chain, non-muscle IIa) (Non-muscle myosin heavy chain IIa) (NMMHC II-a) (NMMHC-IIA) (Cellular myosin heavy chain, type A) (Non-muscle myosin heavy chain-A) (NMMHC-A), gi|3169000|emb|CAB05105.1| myosin, heavy chain 9, non-muscle [Homo sapiens], gi|47678583|emb|CAG…	gi|12667788		226520	1	15	15	26	0.00182	0.0949	NTDQASMPDNTAAQK	R	V	0.95	75.3	46	0	2	0	0	2	1591.7	359	373	TRUE	gi|30268331
Scaffold rerun with new version	Uncategorized Sample	300mM no BAF	S_300mM_no_BAF.RAW (F001830)	myosin, heavy polypeptide 9, non-muscle [Homo sapiens], gi|6166599|sp|P35579.4|MYH9_HUMAN Myosin-9 (Myosin heavy chain 9) (Myosin heavy chain, non-muscle IIa) (Non-muscle myosin heavy chain IIa) (NMMHC II-a) (NMMHC-IIA) (Cellular myosin heavy chain, type A) (Non-muscle myosin heavy chain-A) (NMMHC-A), gi|3169000|emb|CAB05105.1| myosin, heavy chain 9, non-muscle [Homo sapiens], gi|47678583|emb|CAG…	gi|12667788		226520	1	15	15	26	0.00182	0.0949	QLLQANPILEAFGNAK	R	T	0.95	68.8	45.9	0	1	0	0	2	1726.95	210	225	TRUE	gi|30268331
Scaffold rerun with new version	Uncategorized Sample	300mM no BAF	S_300mM_no_BAF.RAW (F001830)	myosin, heavy polypeptide 9, non-muscle [Homo sapiens], gi|6166599|sp|P35579.4|MYH9_HUMAN Myosin-9 (Myosin heavy chain 9) (Myosin heavy chain, non-muscle IIa) (Non-muscle myosin heavy chain IIa) (NMMHC II-a) (NMMHC-IIA) (Cellular myosin heavy chain, type A) (Non-muscle myosin heavy chain-A) (NMMHC-A), gi|3169000|emb|CAB05105.1| myosin, heavy chain 9, non-muscle [Homo sapiens], gi|47678583|emb|CAG…	gi|12667788		226520	1	15	15	26	0.00182	0.0949	THEAQIQEMR	K	Q	0.658	33.4	46.7	0	1	0	0	2	1242.59	1182	1191	TRUE
Scaffold rerun with new version	Uncategorized Sample	300mM no BAF	S_300mM_no_BAF.RAW (F001830)	myosin, heavy polypeptide 9, non-muscle [Homo sapiens], gi|6166599|sp|P35579.4|MYH9_HUMAN Myosin-9 (Myosin heavy chain 9) (Myosin heavy chain, non-muscle IIa) (Non-muscle myosin heavy chain IIa) (NMMHC II-a) (NMMHC-IIA) (Cellular myosin heavy chain, type A) (Non-muscle myosin heavy chain-A) (NMMHC-A), gi|3169000|emb|CAB05105.1| myosin, heavy chain 9, non-muscle [Homo sapiens], gi|47678583|emb|CAG…	gi|12667788		226520	1	15	15	26	0.00182	0.0949	VEAQLQELQVK	K	F	0.95	46.1	46.6	0	1	0	0	2	1284.72	1250	1260	TRUE
Scaffold rerun with new version	Uncategorized Sample	300mM no BAF	S_300mM_no_BAF.RAW (F001830)	myosin, heavy polypeptide 9, non-muscle [Homo sapiens], gi|6166599|sp|P35579.4|MYH9_HUMAN Myosin-9 (Myosin heavy chain 9) (Myosin heavy chain, non-muscle IIa) (Non-muscle myosin heavy chain IIa) (NMMHC II-a) (NMMHC-IIA) (Cellular myosin heavy chain, type A) (Non-muscle myosin heavy chain-A) (NMMHC-A), gi|3169000|emb|CAB05105.1| myosin, heavy chain 9, non-muscle [Homo sapiens], gi|47678583|emb|CAG…	gi|12667788		226520	1	15	15	26	0.00182	0.0949	VISGVLQLGNIVFK	R	K	0.95	43.2	46.3	0	2	0	0	2	1486.9	342	355	TRUE	gi|30268331
Scaffold rerun with new version	Uncategorized Sample	300mM no BAF	S_300mM_no_BAF.RAW (F001830)	beta-actin [Mustela putorius furo]	gi|2724046		35820.4	0.908	1	1	1	7e-05	0.183	EITALAPSTMK	K	I	0.95	44.8	47.1	0	2	0	0	2	1161.62	258	268	FALSE	gi|15277503,gi|66735458,gi|1351867,gi|62897409,gi|14250401,gi|73964667,gi|2318133,gi|73958059,gi|74151948,gi|62897625,gi|809561,gi|74191399,gi|74190672,gi|60389477,gi|109492380,gi|73958065,gi|73958067,gi|74191566,gi|74191564,gi|74213524,gi|47116231,gi|45269029,gi|16924319,gi|62897671,gi|67971314,gi|74187644,gi|197099682,gi|4501887,gi|4501885,gi|28336
Scaffold rerun with new version	Uncategorized Sample	300mM no BAF	S_300mM_no_BAF.RAW (F001830)	beta-actin [Mustela putorius furo]	gi|2724046		35820.4	0.908	1	1	1	7e-05	0.183	QEYDESGPSIVHR	K	K	0.95	51.9	46.4	0	3	1	0	2	1516.7	302	314	FALSE	gi|15277503,gi|66735458,gi|1351867,gi|62897409,gi|74178273,gi|14250401,gi|73964667,gi|2318133,gi|73958059,gi|74151948,gi|62897625,gi|809561,gi|74191399,gi|74190672,gi|60389477,gi|109492380,gi|73958065,gi|73958067,gi|74191566,gi|74191564,gi|74213524,gi|47116231,gi|45269029,gi|16924319,gi|62897671,gi|67971314,gi|74187644,gi|197099682,gi|4501887,gi|4501885,gi|28336
Scaffold rerun with new version	Uncategorized Sample	300mM no BAF	S_300mM_no_BAF.RAW (F001830)	beta-actin [Mustela putorius furo]	gi|2724046		35820.4	0.908	1	1	1	7e-05	0.183	TVLSGGTTMYPGIADR	K	M	0.95	50.7	46	0	1	0	0	2	1638.82	239	254	TRUE
Scaffold rerun with new version	Uncategorized Sample	300mM no BAF	S_300mM_no_BAF.RAW (F001830)	beta-actin [Mustela putorius furo]	gi|2724046		35820.4	0.908	1	1	1	7e-05	0.183	VAPEEHPVLLTEAPLNPK	R	A	0.95	79.4	45.3	0	4	0	0	2	1954.07	38	55	FALSE	gi|15277503,gi|66735458,gi|1351867,gi|62897409,gi|14250401,gi|73964667,gi|2318133,gi|73958059,gi|74151948,gi|62897625,gi|809561,gi|74191399,gi|74190672,gi|60389477,gi|109492380,gi|73958065,gi|73958067,gi|74191566,gi|74191564,gi|74213524,gi|47116231,gi|45269029,gi|16924319,gi|62897671,gi|67971314,gi|74187644,gi|197099682,gi|4501887,gi|4501885,gi|28336
Scaffold rerun with new version	Uncategorized Sample	300mM no BAF	S_300mM_no_BAF.RAW (F001830)	ribosomal protein L4 [Homo sapiens], gi|114657764|ref|XP_001174726.1| PREDICTED: similar to ribosomal protein isoform 2 [Pan troglodytes], gi|22002063|sp|P36578|RL4_HUMAN 60S ribosomal protein L4 (L1), gi|432359|dbj|BAA04887.1| ribosomal protein [Homo sapiens], gi|12655035|gb|AAH01365.1| Ribosomal protein L4 [Homo sapiens], gi|13543304|gb|AAH05817.1| Ribosomal protein L4 [Homo sapiens], gi|140435…	gi|16579885,gi|197097764,gi|62087534		47681.1	0.908	1	1	1	7e-05	0.0211	LDELYGTWR	K	K	0.95	51.3	46.8	0	1	0	0	2	1152.57	260	268	TRUE	gi|75076107,gi|109081576
Scaffold rerun with new version	Uncategorized Sample	300mM no BAF	S_300mM_no_BAF.RAW (F001830)	PREDICTED: similar to eukaryotic translation elongation factor 1	gi|109071712,gi|109071714,gi|109071716,gi|109107440,gi|109107442,gi|197102737,gi|4503471,gi|48734733,gi|48734966,gi|55824554,gi|56403849,gi|62896589,gi|62896605,gi|62896661,gi|62897525,gi|62897621,gi|62897653,gi|73994092,gi|74001312,gi|74746925		50123.2	0.908	1	1	2	0.00014	0.0238	IGGIGTVPVGR	K	V	0.95	54.5	46.6	0	2	0	0	2	1025.61	256	266	TRUE
Scaffold rerun with new version	Uncategorized Sample	300mM no BAF	S_300mM_no_BAF.RAW (F001830)	PREDICTED: scaffold attachment factor B2 isoform 3 [Macaca	gi|109123038,gi|109123040,gi|109123042,gi|19263680,gi|40788876,gi|7661936		107456	0.998	2	2	3	0.00021	0.0399	NLWVSGLSSTTR	R	A	0.95	53.7	46.7	0	1	0	0	2	1320.69	408	419	TRUE
Scaffold rerun with new version	Uncategorized Sample	300mM no BAF	S_300mM_no_BAF.RAW (F001830)	PREDICTED: scaffold attachment factor B2 isoform 3 [Macaca	gi|109123038,gi|109123040,gi|109123042,gi|19263680,gi|40788876,gi|7661936		107456	0.998	2	2	3	0.00021	0.0399	SEPVKEESSELEQPFAQDTSSVGPDR	K	K	0.95	46.7	44.2	0	0	2	0	2	2848.31	226	251	TRUE
Scaffold rerun with new version	Uncategorized Sample	300mM no BAF	S_300mM_no_BAF.RAW (F001830)	PREDICTED: similar to ribosomal protein L3 isoform a isoform 5	gi|109080468,gi|109080470,gi|149270989,gi|337580,gi|38454246,gi|4506649,gi|74181618,gi|74185237,gi|74185347,gi|74191638,gi|75076108,gi|76496472,gi|94404874		46091.5	1	5	5	8	0.00056	0.119	AGMTHIVR	K	E	0.51	31	46.7	0	1	0	0	2	884.478	51	58	TRUE
Scaffold rerun with new version	Uncategorized Sample	300mM no BAF	S_300mM_no_BAF.RAW (F001830)	PREDICTED: similar to ribosomal protein L3 isoform a isoform 5	gi|109080468,gi|109080470,gi|149270989,gi|337580,gi|38454246,gi|4506649,gi|74181618,gi|74185237,gi|74185347,gi|74191638,gi|75076108,gi|76496472,gi|94404874		46091.5	1	5	5	8	0.00056	0.119	HGSLGFLPR	R	K	0.95	54.3	46.4	0	2	0	0	2	983.543	11	19	TRUE
Scaffold rerun with new version	Uncategorized Sample	300mM no BAF	S_300mM_no_BAF.RAW (F001830)	PREDICTED: similar to ribosomal protein L3 isoform a isoform 5	gi|109080468,gi|109080470,gi|149270989,gi|337580,gi|38454246,gi|4506649,gi|74181618,gi|74185237,gi|74185347,gi|74191638,gi|75076108,gi|76496472,gi|94404874		46091.5	1	5	5	8	0.00056	0.119	NNASTDYDLSDK	K	S	0.95	66.6	46.5	0	2	0	0	2	1342.58	301	312	TRUE
[truncated: 849 more rows]
